# Supplementary material for: The interferon-inducible GTPase MxB promotes capsid disassembly and genome release of herpesviruses
Source: eLife journal article supplement (doi:10.7554/elife.76804), 2022-04-27
Supplement: fig5-data1 [file Figure 5B-source data 3-quantification.xlsx]

## Sheet: Sheet1
1		B	D	0.1 M KCl	0.5 M KCl	1 M KCl	C	B	A		3	B	D	0.1 M KCl	0.5 M KCl	1 M KCl	C	B	A
	MxB	5670	3540000	150000	95500	1540000	2380000	373000	3170000		MxB	-9220	722000	-26200	154000	373000	364000	-891	815000
	VP5	3480	6300000	9630000	6930000	5240000	5040000	6520000	7200000		VP5	1540000	1640000	1640000	1670000	1590000	1430000	1700000	1760000
	ratio	1.62931	0.561905	0.0155763	0.0137807	0.293893	0.472222	0.0572086	0.440278		ratio	-0.00598701	0.440244	-0.0159756	0.0922156	0.234591	0.254545	-0.000524118	0.463068
2		B	D	0.1 M KCl	0.5 M KCl	1 M KCl	C	B	A
	MxB	255000	6550000	7140000	9440000	6190000	10300000	4350000	11000000		average	B	D	0.1 M KCl	0.5 M KCl	1 M KCl	C	B	A
	VP5	-195000	16100000	71400000	80200000	77900000	20000000	18200000	22600000		ratio	0.10521	0.46966	0.0332002	0.0745673	0.202648	0.413923	0.0985652	0.463357
	ratio	-1.30769	0.406832	0.1	0.117706	0.0794608	0.515	0.239011	0.486726		SD	1.47166	0.0816141	0.0599628	0.0541636	0.110727	0.139672	0.125008	0.0232253
