# Supplementary material for: The interferon-inducible GTPase MxB promotes capsid disassembly and genome release of herpesviruses
Source: eLife journal article supplement (doi:10.7554/elife.76804), 2022-04-27
Supplement: fig5-data1 [file Figure 5C-source data 5-quantification.xlsx]

## Sheet: Sheet1
raw
cyt	MxA			MxB			MxB-ΔNTE			MxB-ΔGTPbind			MxB-ΔGTPase			MxB-Δdimer
capsid	0.1	0.5	D	0.1	0.5	D	0.1	0.5	D	0.1	0.5	D	0.1	0.5	D	0.1	0.5	D
MxB 1	-35900	9770	8690	173000	881000	1330000	279000	367000	933000	151000	138000	88800	1190000	1500000	2360000	196000	1729000	1960000
MxB 2	33100	16400	21000	1100000	2460000	3360000	1200000	2670000	2510000	122000	56100	63500	692000	432000	4636000	820000	800000	635000
MxB 3	41000	24000	54000	204000	750000	1450000	18000	450000	878000	18000	24000	45000	548000	974000	2480000	110000	271000	880000
VP5 1	15400000	19800000	12100000	13800000	8330000	11500000	10800000	13900000	11000000	10800000	7220000	3830000	7770000	12700000	8830000	3360000	9960000	8360000
VP5 2	14500000	15180000	16390000	16740000	15570000	14240000	16400000	15400000	14820000	13440000	13720000	14030000	14760000	5650000	15230000	14580000	14350000	14110000
VP5 3	6840000	6660000	5760000	6120000	5460000	6270000	6730000	6010000	6110000	5570000	6850000	5250000	6400000	6020000	6110000	5770000	6260000	6140000
ratios
cyt	MxA			MxB			MxB-ΔNTE			MxB-ΔGTPbind			MxB-ΔGTPase			MxB-Δdimer
capsid	0.1	0.5	D	0.1	0.5	D	0.1	0.5	D	0.1	0.5	D	0.1	0.5	D	0.1	0.5	D
M1	-0.00233117	0.000493434	0.000718182	0.0125362	0.105762	0.115652	0.0258333	0.0264029	0.0848182	0.0139815	0.0191136	0.0231854	0.153153	0.11811	0.267271	0.0583333	0.173594	0.23445
M2	0.00228276	0.00108037	0.00128127	0.0657109	0.157996	0.235955	0.0731707	0.173377	0.169366	0.00907738	0.00408892	0.00452602	0.0468835	0.0764602	0.304399	0.0562414	0.0557491	0.0450035
M3	0.00599415	0.0036036	0.009375	0.0333333	0.137363	0.23126	0.00267459	0.0748752	0.143699	0.0032316	0.00350365	0.00857143	0.085625	0.161794	0.405892	0.0190641	0.0432907	0.143322
