# Supplementary material for: The interferon-inducible GTPase MxB promotes capsid disassembly and genome release of herpesviruses
Source: eLife. 2022 Apr 27;11:e76804. doi: 10.7554/eLife.76804 (PMC9150894; doi:10.7554/eLife.76804)
Supplement: Supplementary file 1. — Intensity-Based Absolute Quantitation (iBAQ) counts of the host proteins identified in the proteomic analysis of the cytosolic extracts prepared from rested or IFN-induced THP-1 φ cytosol. Statistical analyses were performed with a Welch’s t-test. The following cut-offs were set for differentially-expressed proteins: permutation-based false-discovery rate (FDR) ≤ 0.05 and |log2 fold-change| ≥ 1.5. The protein groups were filtered to keep only the intensities measured in at least three out of four replicates per condition. Gene Ontology knowledge was used to reference the proteins previously described as induced by interferon. [file elife-76804-supp1.xlsx]

## Sheet: 1. MS analysis pipepline
Project	HSV1-capsid_interactome_Thp1
Analysis	VG - 04.2021
Perseus	1.6.5.0 version
Protein groups	3956
Workflow general
	iBAQ intensity
	Cleaning filter
	Annotation (taxonony, GO terms)
	Export for "isolated capsid" normalisation
	filter for "cytosol"
	Grouping / condition
	log2
	Filter valid value mini. 3/ each condition
	keep human proteins
	back transform intensities
	imputation NaN > 0
	Export for "cytosol" normalisation
	filter for "beads" samples
	Grouping / condition
	log2
	Filter valid value mini. 3/ each condition
	keep human proteins
	back transform intensities
	imputation NaN > 0
	Export for "cytosol" normalisation
Normalisation
	Cytosol (no MCP) > Norm to all (3 values per condition): iBAQ(pg) / (iBAQ median all sample / iBAQ median all all)
	Normalised matrices - loaded to perseus
Cytosol +/- IFN treatment
	Filter for "cytosol" samples
	Keep human proteins
	log2 transform
	Grouping / condition
	Filter valid value mini.3 In one condition
	Imputation (normal - column)
	Annotation ISGs: Interferome DB - FC > 2 (21042021_interferome_up.txt)
	two-sampe t-test (Welch)
	Permutation-based FDR < 0.05; S0 = 0
	Fisher exact test - BH-FDR < 0.05

## Sheet: 2. legend
iBAQ	log2 iBAQ normalised imputed
Taxonomy	homo sapiens annotation (Perseus 2015)
GOBP name	GO annotations (Persues 2015)
GOMF name	GO annotations (Persues 2015)
GOCC name	GO annotations (Persues 2015)
Taxonomy manual	manual annotation to include viral and hamster proteins
Interferome FC>2	annotation gene list Interferome DB (http://www.interferome.org/interferome/home.jspx) Fold change > 2
Interferome_n_exp	number of experiments considered in Interferom DB
welch t-test perm Sign. …..	significant hits in the given test using the Permutation-based FDR correction
Peptides	total number of peptides
Razor + unique peptides	shared and unique peptides - used for quantification
Unique peptides	unique peptides
Sequence coverage [%]
Unique + razor sequence coverage [%]
Unique sequence coverage [%]
Mol. weight [kDa]
Q-value
Score
Intensity
MS/MS count
Protein IDs
Majority protein IDs
Protein names
Gene names

## Sheet: 3. all raw iBAQs
iBAQ THP1 φ +IFN_WholeCyt_A6_21	iBAQ THP1 φ +IFN_WholeCyt_B6_22	iBAQ THP1 φ +IFN_WholeCyt_C6_23	iBAQ THP1 φ +IFN_WholeCyt_D6_24	iBAQ THP1 φ WholeCyt_A5_17	iBAQ THP1 φ WholeCyt_B5_18	iBAQ THP1 φ WholeCyt_C5_19	iBAQ THP1 φ WholeCyt_D5_20	Only identified by site	Reverse	Potential contaminant	Taxonomy	GOBP name	GOMF name	GOCC name	Peptides	Razor + unique peptides	Unique peptides	Sequence coverage [%]	Unique + razor sequence coverage [%]	Unique sequence coverage [%]	Mol. weight [kDa]	Q-value	Score	Intensity	MS/MS count	Protein IDs	Majority protein IDs	Protein names	Gene names
0	0	0	0	0	0	0	0				Homo sapiens	activation of immune response;activation of innate immune response;activation of MAPK activity;activation of MAPKK activity;activation of protein kinase activity;aging;anaphase-promoting complex-dependent proteasomal ubiquitin-dependent protein catabolic process;anatomical structure development;anatomical structure morphogenesis;apoptosis;axon guidance;biological regulation;biosynthetic process;c…	adenyl nucleotide binding;adenyl ribonucleotide binding;ATP binding;binding;catalytic activity;cyclin-dependent protein kinase activity;histone kinase activity;kinase activity;nucleotide binding;phosphotransferase activity, alcohol group as acceptor;protein kinase activity;protein serine/threonine kinase activity;purine nucleotide binding;purine ribonucleoside triphosphate binding;purine ribonucl…	cell part;centrosome;cytoplasm;cytoplasmic part;cytoskeletal part;cytosol;extracellular membrane-bounded organelle;extracellular organelle;extracellular region part;extracellular vesicular exosome;intracellular membrane-bounded organelle;intracellular non-membrane-bounded organelle;intracellular organelle;intracellular organelle part;intracellular part;macromolecular complex;membrane;membrane-bou…	11	1	1	42.1	5.4	5.4	34.081	0.0078519	2.1608	0	1	A0A024QZP7;P06493;A0A087WZZ9;E5RIU6;P06493-2;tr|A0A1U8BN03|A0A1U8BN03_MESAU;tr|A0A1U7QLS7|A0A1U7QLS7_MESAU;G3V317;F8VXD2;F8VYH9;F8VZZ0;F8VTV8;F8VWX7;F8VZ51;K7EJ83;H0YAZ9;tr|A0A1U7QSC9|A0A1U7QSC9_MESAU;Q9BVE2;E7EUK8;tr|A0A1U8CQB4|A0A1U8CQB4_MESAU;E5RGN0;A0A087X209;tr|A0A1U7RC33|A0A1U7RC33_MESAU;tr|A0A1U7Q6A0|A0A1U7Q6A0_MESAU;A0A087WZU2;tr|A0A1U7R9G4|A0A1U7R9G4_MESAU;F5H6Z0;tr|A0A1U8CV62|A0A1U8CV62…	A0A024QZP7;P06493;A0A087WZZ9;E5RIU6;P06493-2	Cyclin-dependent kinase 1	CDC2;CDK1
12251000	7468300	11447000	7152400	10323000	23486000	11973000	6614900				Homo sapiens	biological regulation;cellular process;cellular response to abiotic stimulus;cellular response to osmotic stress;cellular response to stimulus;cellular response to stress;multicellular organismal process;negative regulation of catalytic activity;negative regulation of endopeptidase activity;negative regulation of hydrolase activity;negative regulation of molecular function;negative regulation of …	binding;endopeptidase inhibitor activity;endopeptidase regulator activity;enzyme binding;enzyme inhibitor activity;enzyme regulator activity;peptidase inhibitor activity;peptidase regulator activity;protease binding;protein binding;serine-type endopeptidase inhibitor activity	cell part;cytoplasm;cytoplasmic part;cytosol;extracellular membrane-bounded organelle;extracellular organelle;extracellular region part;extracellular space;extracellular vesicular exosome;intracellular part;macromolecular complex;membrane-bounded organelle;membrane-bounded vesicle;organelle;protein complex;vesicle	9	8	7	32.1	30	27.1	43.024	0	206.89	2340200000	43	A0A024QZX5;A0A087X1N8;P35237	A0A024QZX5;A0A087X1N8;P35237	Serpin B6	SERPINB6
0	65988000	69499000	0	52586000	185040000	0	7506700				Homo sapiens	biological regulation;catabolic process;cellular component organization;cellular component organization or biogenesis;cellular lipid metabolic process;cellular macromolecule metabolic process;cellular metabolic process;cellular process;cellular response to stimulus;chemical homeostasis;cholesterol efflux;cholesterol homeostasis;cholesterol transport;chylomicron remnant clearance;chylomicron remod…	binding;enzyme activator activity;enzyme binding;enzyme inhibitor activity;enzyme regulator activity;identical protein binding;lipase activator activity;lipase inhibitor activity;lipid binding;lipoprotein lipase activator activity;phospholipase activator activity;phospholipase binding;protein binding;protein dimerization activity;protein homodimerization activity	cell part;chylomicron;cytoplasmic part;early endosome;endosome;extracellular membrane-bounded organelle;extracellular organelle;extracellular region;extracellular region part;extracellular space;extracellular vesicular exosome;high-density lipoprotein particle;intermediate-density lipoprotein particle;intracellular membrane-bounded organelle;intracellular organelle;intracellular part;low-density …	2	2	2	25	25	25	8.1463	0.0035367	2.5322	1169800000	2	Q6P163;A0A024R0T9;K7ER74;P02655	Q6P163;A0A024R0T9;K7ER74;P02655	Apolipoprotein C-II;Proapolipoprotein C-II	APOC2;APOC4-APOC2
28946000	4513000	5670400	6217500	4717900	10356000	10583000	4066200				Homo sapiens	alcohol metabolic process;cholesterol metabolic process;establishment of localization;lipid metabolic process;lipid transport;metabolic process;organic substance transport;primary metabolic process;small molecule metabolic process;steroid metabolic process;sterol metabolic process;transport	binding;lipid binding;nucleic acid binding;RNA binding	cell part;cytoplasm;extracellular region part;high-density lipoprotein particle;intracellular membrane-bounded organelle;intracellular organelle;intracellular part;macromolecular complex;membrane;membrane-bounded organelle;nucleus;organelle;plasma lipoprotein particle;plasma membrane;protein-lipid complex	27	27	4	27.1	27.1	5.6	141.44	0	253.62	16081000000	173	A0A024R4E5;Q00341;Q00341-2;H0Y394;H7C0A4;C9JIZ1;H7BZC3;C9J5E5;H7C2D1;C9JHS7;C9JHZ8;C9JES8;C9JZI8;C9JT62;C9JK79;C9JMQ6;C9JQ82;C9JBS3;C9JEJ8;C9JHN6;C9JHS9;C9J739	A0A024R4E5;Q00341;Q00341-2;H0Y394	Vigilin	HDLBP
373849984	199460000	322769984	35737000	258950000	288600000	64004000	417840000				Homo sapiens	biological regulation;biosynthetic process;catabolic process;cellular biosynthetic process;cellular catabolic process;cellular component disassembly;cellular component disassembly at cellular level;cellular component organization;cellular component organization at cellular level;cellular component organization or biogenesis;cellular component organization or biogenesis at cellular level;cellular …	binding;nucleic acid binding;RNA binding;rRNA binding;structural constituent of ribosome;structural molecule activity;translation regulator activity	adherens junction;anchoring junction;cell junction;cell part;cell-substrate adherens junction;cell-substrate junction;cytoplasm;cytoplasmic part;cytosol;cytosolic small ribosomal subunit;extracellular membrane-bounded organelle;extracellular organelle;extracellular region part;extracellular vesicular exosome;focal adhesion;intracellular membrane-bounded organelle;intracellular non-membrane-bounde…	15	15	15	51	51	51	22.591	0	67.861	94388000000	333	tr|A0A1U7R9S7|A0A1U7R9S7_MESAU;A0A024R4M0;P46781;B5MCT8;C9JM19;F2Z3C0;A8MXK4	tr|A0A1U7R9S7|A0A1U7R9S7_MESAU;A0A024R4M0;P46781;B5MCT8;C9JM19	40S ribosomal protein S9	RPS9
77990000	27428000	35903000	14345000	41502000	70348000	35175000	49801000				Homo sapiens	biological regulation;blood coagulation;cell projection organization;cellular component assembly;cellular component organization;cellular component organization at cellular level;cellular component organization or biogenesis;cellular component organization or biogenesis at cellular level;cellular membrane organization;cellular process;chemical homeostasis;cholesterol homeostasis;coagulation;endoc…	adenyl nucleotide binding;adenyl ribonucleotide binding;ATP binding;binding;calcium ion binding;cation binding;enzyme binding;GTP binding;GTPase binding;guanyl nucleotide binding;guanyl ribonucleotide binding;ion binding;metal ion binding;nucleotide binding;protein binding;purine nucleotide binding;purine ribonucleoside triphosphate binding;purine ribonucleotide binding;Rab GTPase binding;Ras GTP…	cell part;cytoplasmic membrane-bounded vesicle;cytoplasmic part;cytoplasmic vesicle;early endosome;early endosome membrane;endocytic vesicle;endosomal part;endosome;endosome membrane;extracellular membrane-bounded organelle;extracellular organelle;extracellular region part;extracellular vesicular exosome;intracellular membrane-bounded organelle;intracellular organelle;intracellular organelle part…	26	23	1	54.6	49.5	2.2	61.927	0	216.54	62459000000	355	A0A024R571;Q9H4M9;C9JC03;C9J2Z4;C9JDQ8;C9JIJ3;C9IZH1	A0A024R571;Q9H4M9;C9JC03;C9J2Z4	EH domain-containing protein 1	EHD1
0	0	1179700	0	0	0	0	0				Homo sapiens	acute inflammatory response;acute-phase response;biological regulation;blood coagulation;cell activation;cellular process;coagulation;defense response;establishment of localization;establishment of localization in cell;exocytosis;hemostasis;inflammatory response;multicellular organismal process;negative regulation of catalytic activity;negative regulation of endopeptidase activity;negative regula…	binding;endopeptidase inhibitor activity;endopeptidase regulator activity;enzyme binding;enzyme inhibitor activity;enzyme regulator activity;glycoprotein binding;identical protein binding;peptidase inhibitor activity;peptidase regulator activity;protease binding;protein binding;serine-type endopeptidase inhibitor activity	cell part;cytoplasmic membrane-bounded vesicle lumen;cytoplasmic part;cytoplasmic vesicle part;endoplasmic reticulum;extracellular matrix;extracellular membrane-bounded organelle;extracellular organelle;extracellular region;extracellular region part;extracellular space;extracellular vesicular exosome;Golgi apparatus;intracellular membrane-bounded organelle;intracellular organelle;intracellular or…	1	1	1	5	5	5	40.234	0.00067636	4.0778	44431000	2	A0A0G2JRN3;A0A024R6I7;P01009-2;P01009	A0A0G2JRN3;A0A024R6I7;P01009-2;P01009	Alpha-1-antitrypsin;Short peptide from AAT	SERPINA1
0	1816000	650640	0	2630300	1104300	0	1163100				Homo sapiens	catabolic process;metabolic process	carboxylic ester hydrolase activity;catalytic activity;deacetylase activity;hydrolase activity;hydrolase activity, acting on ester bonds;methylumbelliferyl-acetate deacetylase activity	cell part;cytoplasmic part;endoplasmic reticulum;endoplasmic reticulum lumen;endoplasmic reticulum part;extracellular region part;extracellular space;intracellular membrane-bounded organelle;intracellular organelle;intracellular organelle lumen;intracellular organelle part;intracellular part;membrane-bounded organelle;membrane-enclosed lumen;organelle;organelle lumen;organelle part	2	2	2	3.5	3.5	3.5	68.898	0.00035436	4.7426	169380000	3	A0A024R6X1;O00748;O00748-2	A0A024R6X1;O00748;O00748-2	Carboxylic ester hydrolase;Cocaine esterase	CES2
162970000	249500000	298790016	59473000	254870000	393790016	82643000	214420000				Homo sapiens	activation of immune response;activation of innate immune response;anaphase-promoting complex-dependent proteasomal ubiquitin-dependent protein catabolic process;antigen processing and presentation;antigen processing and presentation of exogenous antigen;antigen processing and presentation of exogenous peptide antigen;antigen processing and presentation of exogenous peptide antigen via MHC class …	catalytic activity;endopeptidase activity;hydrolase activity;peptidase activity;peptidase activity, acting on L-amino acid peptides;threonine-type endopeptidase activity;threonine-type peptidase activity	cell part;cytoplasm;cytoplasmic mRNA processing body;cytoplasmic part;cytosol;extracellular membrane-bounded organelle;extracellular organelle;extracellular region part;extracellular vesicular exosome;intracellular membrane-bounded organelle;intracellular non-membrane-bounded organelle;intracellular organelle;intracellular organelle part;intracellular part;macromolecular complex;membrane-bounded …	9	9	9	47	47	47	25.898	0	323.31	35094000000	99	tr|A0A1U7QGL6|A0A1U7QGL6_MESAU;A0A024RA52;P25787;C9JCK5;H7C402;H3BT36	tr|A0A1U7QGL6|A0A1U7QGL6_MESAU;A0A024RA52;P25787;C9JCK5	Proteasome subunit alpha type;Proteasome subunit alpha type-2	PSMA2
22830000	14841000	14294000	5786100	20600000	24611000	57371000	13736000				Homo sapiens	anatomical structure development;apoptosis;apoptosis in response to endoplasmic reticulum stress;biological regulation;brain development;catabolic process;cell cycle process;cell death;cell differentiation;cellular catabolic process;cellular component assembly;cellular component assembly at cellular level;cellular component organization;cellular component organization at cellular level;cellular c…	binding;enzyme binding;polyubiquitin binding;proteasome binding;protein binding;protein complex binding;ribonucleoprotein binding;ribosome binding;small conjugating protein binding;ubiquitin binding;ubiquitin protein ligase binding	BAT3 complex;cell part;cytoplasm;cytoplasmic part;cytosol;cytosolic part;ER membrane insertion complex;intracellular membrane-bounded organelle;intracellular organelle;intracellular organelle part;intracellular part;macromolecular complex;membrane-bounded organelle;nuclear part;nucleoplasm;nucleus;organelle;organelle part;protein complex	18	18	18	25.9	25.9	25.9	118.7	0	159.96	6293300000	82	A0A024RCR6;A0A0G2JK23;P46379-2;P46379;P46379-3;A0A0G2JL47;P46379-5;tr|A0A1U7RE42|A0A1U7RE42_MESAU;tr|A0A1U7R3N0|A0A1U7R3N0_MESAU;tr|A0A1U8CZK8|A0A1U8CZK8_MESAU;tr|A0A1U8CPC5|A0A1U8CPC5_MESAU;P46379-4;tr|A0A1U7R650|A0A1U7R650_MESAU;tr|A0A1U7RGJ3|A0A1U7RGJ3_MESAU;tr|A0A1U8CS58|A0A1U8CS58_MESAU;F6S6P2;X6REW1;A0A0G2JJM1;F6UR09;F6U1F2;F6XTU0;A0A0G2JJR8;A0A1B0GX79;F6WML8;F6VEM6;F6X9W3;F6U341;F6TC96;H0Y…	A0A024RCR6;A0A0G2JK23;P46379-2;P46379;P46379-3;A0A0G2JL47;P46379-5;tr|A0A1U7RE42|A0A1U7RE42_MESAU;tr|A0A1U7R3N0|A0A1U7R3N0_MESAU;tr|A0A1U8CZK8|A0A1U8CZK8_MESAU;tr|A0A1U8CPC5|A0A1U8CPC5_MESAU;P46379-4;tr|A0A1U7R650|A0A1U7R650_MESAU;tr|A0A1U7RGJ3|A0A1U7RGJ3_MESAU;tr|A0A1U8CS58|A0A1U8CS58_MESAU	Large proline-rich protein BAG6	BAT3;BAG6
0	0	0	0	0	0	252050	3112600				Homo sapiens	macromolecule metabolic process;membrane protein proteolysis;metabolic process;primary metabolic process;protein metabolic process;proteolysis	aspartic endopeptidase activity, intramembrane cleaving;aspartic-type endopeptidase activity;aspartic-type peptidase activity;binding;catalytic activity;endopeptidase activity;enzyme binding;hydrolase activity;identical protein binding;peptidase activity;peptidase activity, acting on L-amino acid peptides;protein binding;protein dimerization activity;protein homodimerization activity;ubiquitin pr…	cell part;cell surface;cytoplasmic part;endoplasmic reticulum;endoplasmic reticulum part;integral to cytosolic side of endoplasmic reticulum membrane;integral to endoplasmic reticulum membrane;integral to lumenal side of endoplasmic reticulum membrane;integral to membrane;integral to organelle membrane;intracellular membrane-bounded organelle;intracellular organelle;intracellular organelle part;i…	2	2	2	7.7	7.7	7.7	30.162	0.0073654	2.2384	62522000	2	A0A075B6F6;Q8TCT9-5;Q8TCT9;Q8TCT9-4;Q8TCT9-2;A0A0C4DGU3	A0A075B6F6;Q8TCT9-5;Q8TCT9;Q8TCT9-4;Q8TCT9-2;A0A0C4DGU3	Minor histocompatibility antigen H13	HM13
0	2568900	6871900	0	0	0	0	0				Homo sapiens	activation of immune response;biological regulation;cellular component organization;cellular component organization or biogenesis;cellular membrane organization;cellular process;complement activation;complement activation, classical pathway;defense response;endocytosis;establishment of localization;humoral immune response;immune effector process;immune response;immune system process;innate immune…	antigen binding;binding	blood microparticle;cell part;extracellular membrane-bounded organelle;extracellular organelle;extracellular region;extracellular region part;extracellular vesicular exosome;membrane;membrane-bounded organelle;membrane-bounded vesicle;organelle;plasma membrane;vesicle	1	1	1	13.9	13.9	13.9	12.332	0	6.7746	92679000	2	A0A075B6K5;P80748	A0A075B6K5;P80748	Ig lambda chain V-III region LOI	IGLV3-9
0	1354100	1675700	0	2066700	2598700	0	5643200				Homo sapiens	anatomical structure development;biological adhesion;biological regulation;blood coagulation;cell activation;cell adhesion;cell migration;cell motility;cell recognition;cellular component movement;cellular component organization;cellular component organization at cellular level;cellular component organization or biogenesis;cellular component organization or biogenesis at cellular level;cellular m…		cell junction;cell part;contractile fiber;contractile fiber part;cytoplasmic part;cytoplasmic vesicle membrane;cytoplasmic vesicle part;external side of plasma membrane;extracellular membrane-bounded organelle;extracellular organelle;extracellular region part;extracellular space;extracellular vesicular exosome;integral to membrane;intracellular non-membrane-bounded organelle;intracellular organel…	7	7	7	11.2	11.2	11.2	82.521	0	39.857	689050000	7	A0A075B738;P16284-3;P16284-2;P16284;P16284-6;P16284-5;P16284-4;A0A075B727;A0A075B728	A0A075B738;P16284-3;P16284-2;P16284;P16284-6;P16284-5;P16284-4	Platelet endothelial cell adhesion molecule	PECAM1
0	7862500	2842200	912030	2114000	2027300	0	52304				Homo sapiens	cellular component assembly;cellular component assembly at cellular level;cellular component organization;cellular component organization at cellular level;cellular component organization or biogenesis;cellular component organization or biogenesis at cellular level;cellular macromolecular complex assembly;cellular macromolecular complex subunit organization;cellular process;cellular protein compl…	binding;enzyme binding;protein binding	cell part;centrosome;contractile fiber;cytoplasm;cytoplasmic part;cytoskeletal part;Golgi apparatus;intracellular membrane-bounded organelle;intracellular non-membrane-bounded organelle;intracellular organelle;intracellular organelle part;intracellular part;membrane-bounded organelle;microtubule organizing center;myofibril;non-membrane-bounded organelle;nucleus;organelle;organelle part	3	3	3	1.7	1.7	1.7	254.07	0.00066379	3.7878	33055000000	14	A0A087WVF8;A0A0A0MRM0;A0A0A0MRM1;A0A087WX83;A0A075B749;Q5VU43-3;Q5VU43;Q5VU43-4;E9PQG4;A0A0A0MRL8;A0A0A0MRL9;E9PL24;A0A0C4DFQ0;Q5VU43-6;Q5VU43-7;Q5VU43-2	A0A087WVF8;A0A0A0MRM0;A0A0A0MRM1;A0A087WX83;A0A075B749;Q5VU43-3;Q5VU43;Q5VU43-4;E9PQG4;A0A0A0MRL8;A0A0A0MRL9;E9PL24;A0A0C4DFQ0;Q5VU43-6;Q5VU43-7;Q5VU43-2	Myomegalin	PDE4DIP
2973400	1294800	0	0	0	0	0	0				Homo sapiens	biological regulation;metabolic process;negative regulation of catalytic activity;negative regulation of molecular function;negative regulation of monooxygenase activity;negative regulation of nitric-oxide synthase activity;negative regulation of oxidoreductase activity;nitric oxide metabolic process;nitrogen compound metabolic process;regulation of biological process;regulation of catalytic acti…		cell part;cytoplasm;cytoplasmic part;cytosol;Golgi apparatus part;Golgi membrane;intracellular membrane-bounded organelle;intracellular organelle;intracellular organelle part;intracellular part;membrane;membrane-bounded organelle;nuclear part;nucleoplasm;nucleus;organelle;organelle membrane;organelle part	1	1	1	9.1	9.1	9.1	25.62	0	10.704	42682000	1	A0A075B797;M0R3B2;Q9Y314	A0A075B797;M0R3B2;Q9Y314	Nitric oxide synthase-interacting protein	NOSIP
3285100	9262700	7792000	3964300	9036300	5685200	7308500	5034300				Homo sapiens	actin filament severing;actin filament-based process;anatomical structure development;anatomical structure morphogenesis;axon guidance;biological adhesion;biological regulation;cell adhesion;cell morphogenesis;cell morphogenesis involved in differentiation;cell part morphogenesis;cell projection assembly;cell projection morphogenesis;cell projection organization;cell-substrate adhesion;cellular c…	binding;enzyme activator activity;enzyme binding;enzyme regulator activity;GTPase activator activity;GTPase binding;GTPase regulator activity;identical protein binding;nucleoside-triphosphatase regulator activity;protein binding;protein dimerization activity;protein homodimerization activity;Rac GTPase binding;Ras GTPase binding;Rho GTPase binding;small GTPase binding	cell junction;cell part;cell projection;cell projection part;cytoplasm;cytoplasmic membrane-bounded vesicle;cytoplasmic part;cytoplasmic vesicle;cytoskeletal part;cytosol;dendritic spine head;endocytic vesicle;intracellular;intracellular membrane-bounded organelle;intracellular organelle;intracellular organelle part;intracellular part;lamellipodium;membrane;membrane-bounded organelle;membrane-bou…	12	12	12	15.7	15.7	15.7	90.908	0	28.279	8446200000	34	A0A075B7B5;B7ZM87;A2RUF3;O75044;tr|A0A1U7R5K9|A0A1U7R5K9_MESAU;tr|A0A1U8C8Q5|A0A1U8C8Q5_MESAU;tr|A0A1U8C8R7|A0A1U8C8R7_MESAU;tr|A0A1U7R2U8|A0A1U7R2U8_MESAU;Q5VZB4;P0DMP2;P0DJJ0;A0A075B743;A0A075B7E6;A0A087X1G6;A0A075B7C8;A0A075B7E9;E9PDX4;A0A087X0L1;A0A087WW56;tr|A0A1U8CJB8|A0A1U8CJB8_MESAU;G5EA48;Q7Z6B7-2;Q7Z6B7	A0A075B7B5;B7ZM87;A2RUF3;O75044;tr|A0A1U7R5K9|A0A1U7R5K9_MESAU;tr|A0A1U8C8Q5|A0A1U8C8Q5_MESAU;tr|A0A1U8C8R7|A0A1U8C8R7_MESAU;tr|A0A1U7R2U8|A0A1U7R2U8_MESAU;Q5VZB4	SLIT-ROBO Rho GTPase-activating protein 2	SRGAP2
0	758120	1141400	0	750640	862370	0	0				Homo sapiens	establishment of localization;establishment of protein localization;establishment of RNA localization;mRNA transport;nucleic acid transport;nucleobase-containing compound transport;protein transport;RNA transport;transport		cell part;cytoplasmic part;endoplasmic reticulum membrane;endoplasmic reticulum part;intracellular organelle part;intracellular part;macromolecular complex;membrane;membrane part;nuclear membrane;nuclear part;nuclear pore;organelle membrane;organelle part;pore complex;protein complex	1	1	1	2.5	2.5	2.5	99.135	0.0076014	2.1892	87812000	1	A0A087WY75;A0A075B7F8;A6NF01;A8CG34-2;A8CG34	A0A087WY75;A0A075B7F8;A6NF01;A8CG34-2;A8CG34	Putative nuclear envelope pore membrane protein POM 121B;Nuclear envelope pore membrane protein POM 121C	POM121C;POM121B
13086000	12900000	31289000	1314800	31393000	38958000	1601200	14048000				Homo sapiens		binding;calcium ion binding;cation binding;DNA binding;ion binding;metal ion binding;nucleic acid binding	cell part;cytoplasmic part;cytosol;endoplasmic reticulum;endoplasmic reticulum-Golgi intermediate compartment;envelope;extracellular membrane-bounded organelle;extracellular organelle;extracellular region part;extracellular space;extracellular vesicular exosome;Golgi apparatus;intracellular membrane-bounded organelle;intracellular organelle;intracellular organelle part;intracellular part;membrane…	6	5	5	18.9	16.6	16.6	40.368	0	12.531	2528600000	22	E9PKG6;V9HW75;A0A087WSV8;P80303-2;P80303;E9PLR0;E9PLE9;Q2L696;tr|A0A1U7QVP5|A0A1U7QVP5_MESAU;E9PJP3;E9PM22;H0YD18	E9PKG6;V9HW75;A0A087WSV8;P80303-2;P80303;E9PLR0;E9PLE9;Q2L696;tr|A0A1U7QVP5|A0A1U7QVP5_MESAU	Nucleobindin-2;Nesfatin-1	NUCB2;HEL-S-109;Nucb2
242170000	146740000	181470000	87850000	260960000	383020000	168400000	123200000				Homo sapiens	anatomical structure formation involved in morphogenesis;biological regulation;biosynthetic process;cell proliferation;cell redox homeostasis;cellular biosynthetic process;cellular homeostasis;cellular lipid metabolic process;cellular macromolecule metabolic process;cellular metabolic process;cellular nitrogen compound metabolic process;cellular process;cellular response to stimulus;developmental…	antioxidant activity;binding;catalytic activity;coenzyme binding;cofactor binding;disulfide oxidoreductase activity;electron carrier activity;flavin adenine dinucleotide binding;oxidoreductase activity;oxidoreductase activity, acting on a sulfur group of donors;oxidoreductase activity, acting on a sulfur group of donors, NAD or NADP as acceptor;oxidoreductase activity, acting on NADH or NADPH;pro…	cell part;cytoplasmic part;cytosol;extracellular membrane-bounded organelle;extracellular organelle;extracellular region part;extracellular vesicular exosome;intracellular membrane-bounded organelle;intracellular non-membrane-bounded organelle;intracellular organelle;intracellular organelle part;intracellular part;membrane-bounded organelle;membrane-bounded vesicle;mitochondrion;non-membrane-boun…	23	23	23	52.3	52.3	52.3	53.166	0	323.31	42768000000	200	E9PIR7;F8W809;A0A087WSW9;A0A182DWI3;A0A087WSY9;Q16881-5;Q16881-2;Q16881-4;Q16881-3;Q16881-6;Q16881;E2QRB9;Q16881-7;E9PKD3;tr|A0A1U8CJZ9|A0A1U8CJZ9_MESAU;tr|A0A1U7QYQ1|A0A1U7QYQ1_MESAU;A0A0B4J225;E9PIZ5;E9PQI3;E9PLT3;E9PKI4;E9PRI8;tr|A0A1U7QCV0|A0A1U7QCV0_MESAU;E9PJU2	E9PIR7;F8W809;A0A087WSW9;A0A182DWI3;A0A087WSY9;Q16881-5;Q16881-2;Q16881-4;Q16881-3;Q16881-6;Q16881;E2QRB9;Q16881-7;E9PKD3	Thioredoxin reductase 1, cytoplasmic	TXNRD1
11377000	10688000	16436000	1466100	17767000	12063000	12350000	9552900				Homo sapiens	metabolic process	binding;catalytic activity;cation binding;hydrolase activity;hydrolase activity, acting on ester bonds;ion binding;metal ion binding;transition metal ion binding;zinc ion binding	cell part;extracellular membrane-bounded organelle;extracellular organelle;extracellular region part;extracellular vesicular exosome;intracellular membrane-bounded organelle;intracellular organelle;intracellular part;membrane-bounded organelle;membrane-bounded vesicle;nucleus;organelle;vesicle	5	5	5	24.2	24.2	24.2	28.683	0	10.813	1545900000	11	A0A087WT99;Q9H0W9-2;Q9H0W9;E9PJU8;Q9H0W9-4;Q9H0W9-3;E9PQS1;A0A1W2PRB8;E9PPB5;E9PR95;E9PSC3;E9PLC5;E9PLB3;E9PIP1;tr|A0A1U8CUB8|A0A1U8CUB8_MESAU	A0A087WT99;Q9H0W9-2;Q9H0W9;E9PJU8;Q9H0W9-4;Q9H0W9-3;E9PQS1;A0A1W2PRB8	Ester hydrolase C11orf54	C11orf54
24013000	2211100	12584000	1894100	7552700	14138000	4611700	7763800				Homo sapiens	anatomical structure development;axon ensheathment;biological regulation;biosynthetic process;cell development;cellular biosynthetic process;cellular developmental process;cellular macromolecule biosynthetic process;cellular macromolecule metabolic process;cellular metabolic process;cellular process;cellular protein metabolic process;cellular response to stimulus;cellular response to stress;devel…	binding;nucleic acid binding;protein binding;RNA binding;translation factor activity, nucleic acid binding;translation initiation factor activity;translation initiation factor binding	cell part;cytoplasm;cytoplasmic part;cytosol;eukaryotic translation initiation factor 2B complex;intracellular part;macromolecular complex;protein complex	10	10	10	27.7	27.7	27.7	57.495	0	64.58	4599100000	65	A0A087WTA5;E7ERK9;Q9UI10-3;Q9UI10;Q9UI10-2;A0A087WW69;tr|A0A1U7QGQ9|A0A1U7QGQ9_MESAU;tr|A0A1U8C780|A0A1U8C780_MESAU;H7C2L8;F8W8L6	A0A087WTA5;E7ERK9;Q9UI10-3;Q9UI10;Q9UI10-2;A0A087WW69;tr|A0A1U7QGQ9|A0A1U7QGQ9_MESAU;tr|A0A1U8C780|A0A1U8C780_MESAU	Translation initiation factor eIF-2B subunit delta	EIF2B4
37439000	44978000	49745000	4187900	52343000	59917000	10352000	30586000				Homo sapiens	biological regulation;biosynthetic process;catabolic process;cellular biosynthetic process;cellular catabolic process;cellular macromolecule biosynthetic process;cellular macromolecule catabolic process;cellular macromolecule metabolic process;cellular metabolic process;cellular nitrogen compound metabolic process;cellular process;establishment of localization;establishment of RNA localization;ge…	binding;DNA binding;mRNA binding;nucleic acid binding;RNA binding	cell part;cytoplasmic part;cytosol;intracellular non-membrane-bounded organelle;intracellular organelle;intracellular organelle part;intracellular part;macromolecular complex;membrane;non-membrane-bounded organelle;nuclear part;nucleoplasm;organelle;organelle part;ribonucleoprotein complex;RNA granule;stress granule	20	18	18	38.3	35.2	35.2	73.027	0	202.8	10018000000	94	A0A087WTP3;Q92945;tr|A0A1U8CBU7|A0A1U8CBU7_MESAU;M0R0I5;M0QYH3;M0QXW7;M0R3J3;M0QYG1;M0R0C6;M0R251;M0R263	A0A087WTP3;Q92945;tr|A0A1U8CBU7|A0A1U8CBU7_MESAU;M0R0I5	Far upstream element-binding protein 2	KHSRP
1153800	0	304010	3474600	1242200	943200	462440	494210				Homo sapiens	biological regulation;blood coagulation;cellular process;coagulation;establishment of localization;establishment of localization in cell;establishment of protein localization;hemostasis;intracellular protein transport;intracellular transport;membrane docking;multicellular organismal process;protein transport;regulation of biological quality;regulation of body fluid levels;transport;vesicle dockin…		cell part;cytoplasmic part;endosomal part;endosome membrane;Golgi apparatus;Golgi apparatus part;Golgi membrane;integral to membrane;intracellular membrane-bounded organelle;intracellular organelle;intracellular organelle part;intracellular part;intrinsic to membrane;membrane;membrane part;membrane-bounded organelle;organelle;organelle membrane;organelle part	7	7	7	17.4	17.4	17.4	50.736	0	8.0167	2904800000	24	A0A087WU65;tr|A0A1U7R2D6|A0A1U7R2D6_MESAU;Q9NRW7;tr|A0A1U8CL88|A0A1U8CL88_MESAU;A0A1B0GXI6;Q9NRW7-2;B7Z7G7	A0A087WU65;tr|A0A1U7R2D6|A0A1U7R2D6_MESAU;Q9NRW7;tr|A0A1U8CL88|A0A1U8CL88_MESAU;A0A1B0GXI6;Q9NRW7-2	Vacuolar protein sorting-associated protein 45	VPS45
2610500	8105900	2654500	3165900	8815400	9158800	4009400	1479200				Homo sapiens	activation of immune response;activation of innate immune response;apoptosis;B cell homeostasis;B-1 B cell homeostasis;biological regulation;cell death;cellular component assembly;cellular component organization;cellular component organization or biogenesis;cellular macromolecule metabolic process;cellular metabolic process;cellular process;cellular protein metabolic process;cellular response to …	acid-amino acid ligase activity;binding;catalytic activity;cation binding;cysteine-type peptidase activity;DNA binding;enzyme binding;hydrolase activity;ion binding;ligase activity;ligase activity, forming carbon-nitrogen bonds;metal ion binding;nucleic acid binding;peptidase activity;peptidase activity, acting on L-amino acid peptides;protease binding;protein binding;protein self-association;sma…	cell part;centrosome;cytoplasm;cytoplasmic part;cytoskeletal part;cytosol;extracellular membrane-bounded organelle;extracellular organelle;extracellular region part;extracellular vesicular exosome;intracellular membrane-bounded organelle;intracellular non-membrane-bounded organelle;intracellular organelle;intracellular organelle part;intracellular part;lysosome;lytic vacuole;membrane-bounded orga…	9	9	9	15.5	15.5	15.5	76.161	0	15.542	2455200000	19	D3TTY5;A0A087WU80;P21580;A0A087WXL5;A0A087X1N1;tr|A0A1U8D3Z1|A0A1U8D3Z1_MESAU;tr|A0A1U7QH00|A0A1U7QH00_MESAU;Q5VXQ9;Q5VXQ8;A0A087WVN3;Q5VXR0	D3TTY5;A0A087WU80;P21580;A0A087WXL5;A0A087X1N1;tr|A0A1U8D3Z1|A0A1U8D3Z1_MESAU;tr|A0A1U7QH00|A0A1U7QH00_MESAU	Tumor necrosis factor alpha-induced protein 3;A20p50;A20p37	TNFAIP3
0	692090	824670	0	0	381730	0	0				Homo sapiens	biological adhesion;biological regulation;cell adhesion;cellular macromolecule metabolic process;cellular metabolic process;cellular nitrogen compound metabolic process;cellular process;macromolecule metabolic process;metabolic process;mRNA 3'-end processing;mRNA metabolic process;mRNA polyadenylation;mRNA processing;nitrogen compound metabolic process;nucleic acid metabolic process;nucleobase-co…		cell junction;cell part;cell-cell junction;cytoplasm;cytoskeleton;intracellular non-membrane-bounded organelle;intracellular organelle;intracellular organelle part;intracellular part;membrane;non-membrane-bounded organelle;nuclear part;nucleoplasm;occluding junction;organelle;organelle part;plasma membrane;tight junction	2	2	2	3.6	3.6	3.6	74.538	0.00067981	4.1338	68346000	3	M0R3C7;A0A087WUE9;tr|A0A1U7R2V5|A0A1U7R2V5_MESAU;Q92797-2;Q92797;M0R1C2;M0R180;M0QXP5	M0R3C7;A0A087WUE9;tr|A0A1U7R2V5|A0A1U7R2V5_MESAU;Q92797-2;Q92797;M0R1C2;M0R180;M0QXP5	Symplekin	SYMPK
4080800	7987300	18598000	6591200	12644000	16976000	0	9206300				Homo sapiens	anatomical structure development;anatomical structure morphogenesis;biological regulation;biosynthetic process;cell development;cell motility;cell part morphogenesis;cellular biosynthetic process;cellular component morphogenesis;cellular component movement;cellular component organization;cellular component organization at cellular level;cellular component organization or biogenesis;cellular compo…	binding;nucleic acid binding;nucleotide binding	acrosomal vesicle;cell part;cytoplasmic membrane-bounded vesicle;cytoplasmic part;cytoplasmic vesicle;intracellular membrane-bounded organelle;intracellular organelle;intracellular part;macromolecular complex;membrane-bounded organelle;membrane-bounded vesicle;mitochondrion;nucleus;organelle;perinuclear region of cytoplasm;ribonucleoprotein complex;stored secretory granule;vesicle	2	2	2	26.1	26.1	26.1	10.353	0.00034965	4.5115	656130000	7	A0A087WUN7;H0YJ40;G3V4X6;G3V2S9;Q9GZT3-2;Q9GZT3;H0YJI1;H0YJW7	A0A087WUN7;H0YJ40;G3V4X6;G3V2S9;Q9GZT3-2;Q9GZT3;H0YJI1;H0YJW7	SRA stem-loop-interacting RNA-binding protein, mitochondrial	SLIRP
325420000	345070016	495380000	129900000	534809984	622689984	181020000	309830016				Homo sapiens	acylglycerol metabolic process;aging;amine metabolic process;anatomical structure development;anatomical structure formation involved in morphogenesis;anatomical structure morphogenesis;angiogenesis;angiogenesis involved in wound healing;arachidonic acid metabolic process;biological regulation;blood vessel endothelial cell migration;carboxylic acid metabolic process;catabolic process;cell develop…	amine binding;amino acid binding;antioxidant activity;binding;carboxylic acid binding;catalytic activity;glutathione binding;glutathione peroxidase activity;modified amino acid binding;oxidoreductase activity;oxidoreductase activity, acting on paired donors, with incorporation or reduction of molecular oxygen;oxidoreductase activity, acting on peroxide as acceptor;peptide binding;peroxidase activ…	cell part;cytoplasm;cytoplasmic part;cytosol;extracellular membrane-bounded organelle;extracellular organelle;extracellular region part;extracellular vesicular exosome;intracellular membrane-bounded organelle;intracellular organelle;intracellular organelle lumen;intracellular organelle part;intracellular part;membrane-bounded organelle;membrane-bounded vesicle;membrane-enclosed lumen;mitochondria…	11	11	9	61.4	61.4	47.5	21.938	0	323.31	38954000000	168	A0A087WUQ6;P07203;P07203-2	A0A087WUQ6;P07203	Glutathione peroxidase;Glutathione peroxidase 1	GPX1
85096000	26464000	60877000	13577000	57308000	164930000	19960000	103640000				Homo sapiens	biological regulation;biosynthetic process;catabolic process;cellular biosynthetic process;cellular catabolic process;cellular component biogenesis;cellular component biogenesis at cellular level;cellular component disassembly;cellular component disassembly at cellular level;cellular component organization;cellular component organization at cellular level;cellular component organization or biogen…	binding;nucleotide binding;protein binding;structural constituent of ribosome;structural molecule activity;translation initiation factor binding	cell part;cytoplasm;cytoplasmic part;cytosol;cytosolic small ribosomal subunit;intracellular membrane-bounded organelle;intracellular non-membrane-bounded organelle;intracellular organelle;intracellular organelle part;intracellular part;macromolecular complex;membrane;membrane-bounded organelle;non-membrane-bounded organelle;nuclear part;nucleolus;nucleus;organelle;organelle part;ribonucleoprotei…	5	5	5	35.9	35.9	35.9	15.197	0	21.993	12282000000	140	E7ETK0;A0A087WUS0;sp|P62848|RS24_MESAU;P62847-2;P62847-3;P62847;P62847-4;tr|A0A1U8CJP8|A0A1U8CJP8_MESAU	E7ETK0;A0A087WUS0;sp|P62848|RS24_MESAU;P62847-2;P62847-3;P62847;P62847-4;tr|A0A1U8CJP8|A0A1U8CJP8_MESAU	40S ribosomal protein S24	RPS24
8820500	10445000	3762800	481590	4865200	8359400	845160	12990000				Homo sapiens	biological regulation;biosynthetic process;cellular biosynthetic process;cellular macromolecule biosynthetic process;cellular macromolecule metabolic process;cellular metabolic process;cellular process;cellular protein metabolic process;gene expression;macromolecule biosynthetic process;macromolecule metabolic process;metabolic process;posttranscriptional regulation of gene expression;primary met…	binding;catalytic activity;GTP binding;GTPase activity;guanyl nucleotide binding;guanyl ribonucleotide binding;hydrolase activity;hydrolase activity, acting on acid anhydrides;hydrolase activity, acting on acid anhydrides, in phosphorus-containing anhydrides;nucleic acid binding;nucleoside-triphosphatase activity;nucleotide binding;purine nucleotide binding;purine ribonucleoside triphosphate bind…	cell part;cytoplasm;cytoplasmic part;cytosol;intracellular part	14	14	14	17.7	17.7	17.7	138.68	0	85.38	4405300000	43	A0A087WUT6;O60841;tr|A0A1U8CB19|A0A1U8CB19_MESAU;tr|A0A1U8CT40|A0A1U8CT40_MESAU	A0A087WUT6;O60841;tr|A0A1U8CB19|A0A1U8CB19_MESAU	Eukaryotic translation initiation factor 5B	EIF5B
25067000	14340000	14475000	5309400	19681000	19013000	12475000	7742600				Homo sapiens	activation of immune response;activation of innate immune response;activation of MAPK activity;activation of NF-kappaB-inducing kinase activity;activation of protein kinase activity;antigen receptor-mediated signaling pathway;apoptosis;B cell homeostasis;biological regulation;biosynthetic process;cell death;cell surface receptor linked signaling pathway;cellular biosynthetic process;cellular macr…	binding;cation binding;enzyme binding;identical protein binding;ion binding;K63-linked polyubiquitin binding;metal ion binding;molecular transducer activity;polyubiquitin binding;protein binding;protein dimerization activity;protein domain specific binding;protein heterodimerization activity;protein homodimerization activity;signal transducer activity;small conjugating protein binding;ubiquitin b…	cell part;cytoplasm;cytoplasmic part;cytoskeletal part;cytosol;cytosolic part;IkappaB kinase complex;intracellular;intracellular membrane-bounded organelle;intracellular non-membrane-bounded organelle;intracellular organelle;intracellular organelle part;intracellular part;macromolecular complex;membrane-bounded organelle;mitotic spindle;non-membrane-bounded organelle;nucleus;organelle;organelle p…	7	7	7	25.1	25.1	25.1	47.256	0	323.31	6380200000	84	A0A087X0G7;A0A087WUW6;A0A087X1B1;Q9Y6K9;Q9Y6K9-2;tr|A0A1U7RGP0|A0A1U7RGP0_MESAU;tr|A0A1U8CS87|A0A1U8CS87_MESAU;A0A087WV30;C9JN51;Q9Y6K9-3;C9J2V2;C9JH59	A0A087X0G7;A0A087WUW6;A0A087X1B1;Q9Y6K9;Q9Y6K9-2;tr|A0A1U7RGP0|A0A1U7RGP0_MESAU;tr|A0A1U8CS87|A0A1U8CS87_MESAU	NF-kappa-B essential modulator	IKBKG
681840	2114800	2187200	63101	2719000	4593200	103410	1004800				Homo sapiens	actin filament capping;axon guidance;biological regulation;cell cycle cytokinesis;cell cycle process;cellular component assembly;cellular component assembly at cellular level;cellular component organization;cellular component organization at cellular level;cellular component organization or biogenesis;cellular component organization or biogenesis at cellular level;cellular macromolecule metabolic…	actin binding;ankyrin binding;binding;cytoskeletal protein binding;enzyme binding;GTPase binding;lipid binding;phospholipid binding;protein binding;structural constituent of cytoskeleton;structural molecule activity	axolemma;axon part;cell cortex part;cell part;cell projection membrane;cell projection part;contractile fiber part;cuticular plate;cytoplasm;cytoplasmic part;cytoskeletal part;cytoskeleton;cytosol;extracellular membrane-bounded organelle;extracellular organelle;extracellular region part;extracellular vesicular exosome;intracellular non-membrane-bounded organelle;intracellular organelle;intracellu…	20	20	20	11.4	11.4	11.4	274.83	0	36.875	2188000000	37	A0A087WUZ3;Q01082;Q01082-3;Q01082-2;tr|A0A1U7QLZ6|A0A1U7QLZ6_MESAU;tr|A0A1U8BZS2|A0A1U8BZS2_MESAU;tr|A0A1U7QBK2|A0A1U7QBK2_MESAU;F8W6C1;tr|A0A1U7Q2V5|A0A1U7Q2V5_MESAU;tr|A0A1U8BIF5|A0A1U8BIF5_MESAU;O15020-2;O15020	A0A087WUZ3;Q01082;Q01082-3;Q01082-2;tr|A0A1U7QLZ6|A0A1U7QLZ6_MESAU;tr|A0A1U8BZS2|A0A1U8BZS2_MESAU;tr|A0A1U7QBK2|A0A1U7QBK2_MESAU	Spectrin beta chain, non-erythrocytic 1	SPTBN1
0	4302000	2316200	2604200	18371000	16798000	2653600	2763800				Homo sapiens	biological regulation;biosynthetic process;cellular biosynthetic process;cellular macromolecule biosynthetic process;cellular macromolecule metabolic process;cellular metabolic process;cellular nitrogen compound metabolic process;cellular process;gamete generation;macromolecule biosynthetic process;macromolecule metabolic process;male gamete generation;metabolic process;multicellular organismal p…	protein binding transcription factor activity;transcription coactivator activity;transcription cofactor activity;transcription factor binding transcription factor activity	cell part;centrosome;cytoplasm;cytoplasmic part;cytoskeletal part;intracellular membrane-bounded organelle;intracellular non-membrane-bounded organelle;intracellular organelle;intracellular organelle part;intracellular part;membrane-bounded organelle;microtubule organizing center;mitochondrion;non-membrane-bounded organelle;nucleus;organelle;organelle part	3	3	3	43.6	43.6	43.6	12.755	0	84.471	398470000	5	A0A087WV05;Q99417;tr|A0A1U7RA32|A0A1U7RA32_MESAU	A0A087WV05;Q99417;tr|A0A1U7RA32|A0A1U7RA32_MESAU	C-Myc-binding protein	MYCBP
106760000	85942000	106430000	19600000	144480000	138050000	29575000	226750000				Homo sapiens	biosynthetic process;catabolic process;cellular biosynthetic process;cellular catabolic process;cellular component disassembly;cellular component disassembly at cellular level;cellular component organization;cellular component organization at cellular level;cellular component organization or biogenesis;cellular component organization or biogenesis at cellular level;cellular macromolecular complex…	structural constituent of ribosome;structural molecule activity	cell part;cytoplasmic part;cytosol;cytosolic large ribosomal subunit;endoplasmic reticulum;intracellular membrane-bounded organelle;intracellular non-membrane-bounded organelle;intracellular organelle;intracellular organelle part;intracellular part;large ribosomal subunit;macromolecular complex;membrane;membrane-bounded organelle;non-membrane-bounded organelle;nucleus;organelle;organelle part;pol…	6	6	6	32.5	32.5	32.5	18.565	0	19.65	31386000000	218	F8W7C6;A0A087WV22;X1WI28;P27635;H7C123;H7C2C5;tr|A0A1U7RAC1|A0A1U7RAC1_MESAU;tr|A0A1U8BYR8|A0A1U8BYR8_MESAU;tr|A0A1U7R6W9|A0A1U7R6W9_MESAU;tr|A0A1U7QZ06|A0A1U7QZ06_MESAU;Q96L21;H7C2U2;B8A6G2;tr|A0A1U7RGP8|A0A1U7RGP8_MESAU;A6QRI9	F8W7C6;A0A087WV22;X1WI28;P27635;H7C123;H7C2C5;tr|A0A1U7RAC1|A0A1U7RAC1_MESAU;tr|A0A1U8BYR8|A0A1U8BYR8_MESAU;tr|A0A1U7R6W9|A0A1U7R6W9_MESAU;tr|A0A1U7QZ06|A0A1U7QZ06_MESAU;Q96L21	60S ribosomal protein L10;60S ribosomal protein L10-like	RPL10;RPL10L
0	2828900	0	0	0	0	0	0				Homo sapiens	biological regulation;cell cycle;cell cycle process;cellular component organization;cellular component organization at cellular level;cellular component organization or biogenesis;cellular component organization or biogenesis at cellular level;cellular macromolecule metabolic process;cellular metabolic process;cellular process;cellular protein metabolic process;cellular response to stimulus;cytos…	binding;catalytic activity;enzyme binding;enzyme inhibitor activity;enzyme regulator activity;GTPase regulator activity;guanyl-nucleotide exchange factor activity;identical protein binding;kinase activity;kinase binding;kinase inhibitor activity;kinase regulator activity;nucleoside-triphosphatase regulator activity;phosphotransferase activity, alcohol group as acceptor;protein binding;protein dim…	cell part;centrosome;cytoplasmic part;cytoskeletal part;cytosol;intracellular membrane-bounded organelle;intracellular non-membrane-bounded organelle;intracellular organelle;intracellular organelle part;intracellular part;membrane-bounded organelle;microtubule organizing center;non-membrane-bounded organelle;nucleus;organelle;organelle part;perinuclear region of cytoplasm	1	1	1	8.8	8.8	8.8	38.099	0	99.366	42433000	1	A0A087WV25;Q8N103-3;O95684-2;O95684	A0A087WV25;Q8N103-3;O95684-2;O95684	FGFR1 oncogene partner	FGFR1OP
0	0	0	0	0	0	0	0				Homo sapiens		acetyltransferase activity;adenyl nucleotide binding;adenyl ribonucleotide binding;ATP binding;binding;catalytic activity;N-acetyltransferase activity;N-acyltransferase activity;nucleotide binding;purine nucleotide binding;purine ribonucleoside triphosphate binding;purine ribonucleotide binding;ribonucleotide binding;transferase activity;transferase activity, transferring acyl groups;transferase …	cell part;intracellular membrane-bounded organelle;intracellular non-membrane-bounded organelle;intracellular organelle;intracellular organelle part;intracellular part;membrane;membrane-bounded organelle;non-membrane-bounded organelle;nuclear part;nucleolus;nucleus;organelle;organelle part	1	1	1	1.8	1.8	1.8	93.533	0.0021618	2.9538	0	1	A0A087WV29;tr|A0A1U7Q5B3|A0A1U7Q5B3_MESAU;Q9H0A0-2;Q9H0A0	A0A087WV29;tr|A0A1U7Q5B3|A0A1U7Q5B3_MESAU;Q9H0A0-2;Q9H0A0	N-acetyltransferase 10	NAT10
0	0	0	0	0	0	0	0				Homo sapiens			extracellular region part;extracellular space	1	1	1	12.1	12.1	12.1	14.001	0.00034329	4.2736	335830000	9	A0A087WYF5;A0A0A0MT31;A0A087WYT0;A0A087WV42;A0A087WZY1;P02810	A0A087WYF5;A0A0A0MT31;A0A087WYT0;A0A087WV42;A0A087WZY1;P02810	Salivary acidic proline-rich phosphoprotein 1/2;Salivary acidic proline-rich phosphoprotein 1/2;Salivary acidic proline-rich phosphoprotein 3/4;Peptide P-C	PRH1
1391600	1207700	1577200	618310	1805200	3181100	1581100	1353200				Homo sapiens	activation of immune response;activation of innate immune response;activation of phospholipase C activity;activation of protein kinase A activity;activation of protein kinase activity;acylglycerol catabolic process;acylglycerol metabolic process;alcohol biosynthetic process;alcohol metabolic process;anatomical structure formation involved in morphogenesis;biological regulation;biosynthetic proces…	adenyl nucleotide binding;adenyl ribonucleotide binding;ATP binding;binding;cAMP-dependent protein kinase activity;catalytic activity;cation binding;cyclic nucleotide-dependent protein kinase activity;enzyme binding;ion binding;kinase activity;magnesium ion binding;metal ion binding;nucleotide binding;phosphotransferase activity, alcohol group as acceptor;protein binding;protein kinase activity;p…	cAMP-dependent protein kinase complex;cell part;centrosome;cytoplasmic part;cytoskeletal part;cytosol;extracellular membrane-bounded organelle;extracellular organelle;extracellular region part;extracellular vesicular exosome;intracellular non-membrane-bounded organelle;intracellular organelle;intracellular organelle part;intracellular part;macromolecular complex;membrane;membrane-bounded organell…	8	2	1	21	6.2	3.6	39.236	0	5.4769	890370000	13	A0A087WVC4;A0A0A0MS54;P22694-4;P22694-3;P22694;P22694-5;P22694-7;P22694-6;P22694-9;P22694-2;tr|A0A1U8D0V7|A0A1U8D0V7_MESAU;P22694-10;B1APF7;B1APG1;B1APG0;B1APG2;B1APF8;B1APF9;B1APG3;P22694-8;P22612	A0A087WVC4;A0A0A0MS54;P22694-4;P22694-3;P22694;P22694-5;P22694-7;P22694-6;P22694-9;P22694-2;tr|A0A1U8D0V7|A0A1U8D0V7_MESAU;P22694-10;B1APF7;B1APG1;B1APG0;B1APG2;B1APF8;B1APF9;B1APG3;P22694-8	cAMP-dependent protein kinase catalytic subunit beta	PRKACB
79904000	0	33535000	8611600	0	5115500	19793000	15068000				Homo sapiens	cellular metabolic process;cellular nitrogen compound metabolic process;cellular process;metabolic process;nitrogen compound metabolic process;nucleobase-containing compound metabolic process;nucleobase-containing small molecule metabolic process;nucleoside phosphate metabolic process;nucleotide metabolic process;nucleotide phosphorylation;phosphate-containing compound metabolic process;phosphoru…	adenyl nucleotide binding;adenyl ribonucleotide binding;adenylate kinase activity;ATP binding;ATPase activity;binding;catalytic activity;hydrolase activity;hydrolase activity, acting on acid anhydrides;hydrolase activity, acting on acid anhydrides, in phosphorus-containing anhydrides;kinase activity;nucleobase-containing compound kinase activity;nucleoside-triphosphatase activity;nucleotide bindi…	Cajal body;cell part;intracellular organelle part;intracellular part;membrane;nuclear body;nuclear part;nucleoplasm;nucleoplasm part;organelle part	2	2	2	53.2	53.2	53.2	4.9969	0.00034423	4.2958	343280000	3	A0A087WY94;A0A087WVD7;Q9Y3D8;Q9Y3D8-2	A0A087WY94;A0A087WVD7;Q9Y3D8;Q9Y3D8-2	Adenylate kinase isoenzyme 6	TAF9;AK6
274630	1289500	712840	88098	436980	2369000	1221500	2313100				Homo sapiens	cellular component organization;cellular component organization at cellular level;cellular component organization or biogenesis;cellular component organization or biogenesis at cellular level;cellular process;establishment of localization;establishment of localization in cell;establishment of protein localization;Golgi organization;Golgi vesicle transport;intracellular transport;intra-Golgi vesic…		cell part;cytoplasmic part;Golgi apparatus;Golgi apparatus part;Golgi membrane;Golgi transport complex;intracellular membrane-bounded organelle;intracellular organelle;intracellular organelle part;intracellular part;macromolecular complex;membrane;membrane-bounded organelle;organelle;organelle membrane;organelle part;protein complex	6	6	6	8.5	8.5	8.5	104.79	0	9.1927	541410000	8	A0A087WVI0;Q8WTW3;E9PBL8;J3KRP4;tr|A0A1U8BMW7|A0A1U8BMW7_MESAU;tr|A0A1U8BRK7|A0A1U8BRK7_MESAU;tr|A0A1U7QNU6|A0A1U7QNU6_MESAU	A0A087WVI0;Q8WTW3;E9PBL8	Conserved oligomeric Golgi complex subunit 1	COG1
339220000	164260000	218510000	94638000	236540000	371209984	141380000	306969984				Homo sapiens	antigen processing and presentation;antigen processing and presentation of exogenous antigen;antigen processing and presentation of exogenous peptide antigen;antigen processing and presentation of exogenous peptide antigen via MHC class II;antigen processing and presentation of peptide antigen;antigen processing and presentation of peptide antigen via MHC class II;antigen processing and presentat…	binding;clathrin binding;clathrin light chain binding;double-stranded RNA binding;enzyme binding;kinase binding;nucleic acid binding;protein binding;protein kinase binding;RNA binding;structural molecule activity	adherens junction;anchoring junction;cell junction;cell part;cell-substrate adherens junction;cell-substrate junction;clathrin coat;clathrin coat of coated pit;clathrin coat of trans-Golgi network vesicle;clathrin coated vesicle membrane;clathrin complex;clathrin vesicle coat;clathrin-coated endocytic vesicle membrane;clathrin-coated vesicle;coated vesicle;coated vesicle membrane;cytoplasm;cytopl…	73	73	73	53.4	53.4	53.4	191.63	0	323.31	220520000000	1322	tr|A0A1U7QDR7|A0A1U7QDR7_MESAU;A0A087WVQ6;tr|A0A1U8CDB7|A0A1U8CDB7_MESAU;Q00610-2;Q00610;J3KS13;P53675-2;P53675;A0A087WX41;K7EJJ5;J3KSQ2;J3QL20;J3KRF5;F5H5N6;A0A087WV74;A0A087WXH4	tr|A0A1U7QDR7|A0A1U7QDR7_MESAU;A0A087WVQ6;tr|A0A1U8CDB7|A0A1U8CDB7_MESAU;Q00610-2;Q00610	Clathrin heavy chain;Clathrin heavy chain 1	CLTC
0	0	0	0	343720000	0	0	0				Homo sapiens	biological regulation;cellular metabolic process;cellular nitrogen compound metabolic process;cellular process;cellular response to stimulus;metabolic process;nitrogen compound metabolic process;nucleobase-containing compound metabolic process;nucleobase-containing small molecule metabolic process;nucleoside phosphate metabolic process;nucleotide metabolic process;nucleotide phosphorylation;phosp…	catalytic activity;guanylate kinase activity;kinase activity;nucleobase-containing compound kinase activity;nucleotide kinase activity;phosphotransferase activity, phosphate group as acceptor;transferase activity;transferase activity, transferring phosphorus-containing groups	cell part;integral to membrane;integral to plasma membrane;intrinsic to membrane;intrinsic to plasma membrane;membrane;membrane part;plasma membrane part	1	1	1	13.7	13.7	13.7	7.947	0.0075928	2.1828	687450000	1	E5RFN8;A0A087X0C7;E5RK50;E5RJK0;E5RK44;E5RI32;E5RIU3;A0A087WVY2;E5RI47;B4DZ84;tr|A0A1U7Q5R3|A0A1U7Q5R3_MESAU;D3DX48;tr|A0A1U7QDM7|A0A1U7QDM7_MESAU;A0A0A0MRU0;A0A0D9SFF8;D3DX49;A0A0C4DH75;Q14168-6;Q14168-2;Q14168-3;Q14168;Q14168-4	E5RFN8;A0A087X0C7;E5RK50;E5RJK0;E5RK44;E5RI32;E5RIU3;A0A087WVY2;E5RI47;B4DZ84;tr|A0A1U7Q5R3|A0A1U7Q5R3_MESAU;D3DX48;tr|A0A1U7QDM7|A0A1U7QDM7_MESAU;A0A0A0MRU0;A0A0D9SFF8;D3DX49;A0A0C4DH75;Q14168-6;Q14168-2;Q14168-3;Q14168;Q14168-4	MAGUK p55 subfamily member 2	MPP2
0	0	1370300	2008900	1888200	0	0	0				Homo sapiens	biological regulation;biosynthetic process;cellular biosynthetic process;cellular macromolecule biosynthetic process;cellular macromolecule metabolic process;cellular metabolic process;cellular nitrogen compound metabolic process;cellular process;cellular response to stimulus;cellular response to stress;defense response;developmental process;DNA metabolic process;DNA repair;gene expression;immune…	binding;catalytic activity;DNA binding;DNA-directed RNA polymerase activity;nucleic acid binding;nucleotidyltransferase activity;RNA polymerase activity;transferase activity;transferase activity, transferring phosphorus-containing groups	cell part;cytoplasmic part;cytosol;DNA-directed RNA polymerase complex;DNA-directed RNA polymerase I complex;DNA-directed RNA polymerase II, core complex;DNA-directed RNA polymerase III complex;intracellular membrane-bounded organelle;intracellular organelle;intracellular organelle part;intracellular part;macromolecular complex;membrane-bounded organelle;nuclear DNA-directed RNA polymerase comple…	2	2	2	16.8	16.8	16.8	21.459	0	13.374	265840000	1	A0A087WVZ9;A0A0A0MQR7;tr|A0A1U8CSM2|A0A1U8CSM2_MESAU;P19388;A0A087WVN5;A0A087WWX0	A0A087WVZ9;A0A0A0MQR7;tr|A0A1U8CSM2|A0A1U8CSM2_MESAU;P19388;A0A087WVN5;A0A087WWX0	DNA-directed RNA polymerases I, II, and III subunit RPABC1	POLR2E
67292000	21645000	33553000	21398000	46520000	54925000	47255000	21021000				Homo sapiens	apoptosis;autophagic cell death;biological regulation;biosynthetic process;carboxylic acid biosynthetic process;carboxylic acid metabolic process;catabolic process;cell communication;cell death;cellular biosynthetic process;cellular catabolic process;cellular component assembly;cellular component organization;cellular component organization or biogenesis;cellular ketone metabolic process;cellular…	binding;carboxylic acid binding;catalytic activity;fatty acid binding;identical protein binding;lipid binding;lysophosphatidic acid acyltransferase activity;lysophospholipid acyltransferase activity;monocarboxylic acid binding;protein binding;protein dimerization activity;protein homodimerization activity;transferase activity;transferase activity, transferring acyl groups;transferase activity, tr…	autophagic vacuole membrane;cell part;cytoplasm;cytoplasmic part;extracellular membrane-bounded organelle;extracellular organelle;extracellular region part;extracellular vesicular exosome;Golgi apparatus part;Golgi membrane;intracellular organelle part;intracellular part;macromolecular complex;membrane;membrane-bounded organelle;membrane-bounded vesicle;midbody;mitochondrial membrane;mitochondria…	15	15	14	40.4	40.4	38.3	44.26	0	323.31	90434000000	463	A0A087WW40;Q9Y371;Q9Y371-2;tr|A0A1U8CPH7|A0A1U8CPH7_MESAU;Q9Y371-3	A0A087WW40;Q9Y371;Q9Y371-2;tr|A0A1U8CPH7|A0A1U8CPH7_MESAU	Endophilin-B1	SH3GLB1
6920600	7019700	9489100	0	27875000	8478300	2749400	6309500				Homo sapiens	adult behavior;adult locomotory behavior;adult walking behavior;alcohol metabolic process;amine metabolic process;amine transport;amino acid transport;anatomical structure development;anatomical structure maturation;anatomical structure morphogenesis;anion homeostasis;behavior;behavioral response to pain;biological regulation;calcium ion homeostasis;calcium ion import;calcium ion transmembrane tr…	binding;calcium channel activity;cation binding;cation channel activity;cation transmembrane transporter activity;channel activity;gated channel activity;high voltage-gated calcium channel activity;ion binding;ion channel activity;ion transmembrane transporter activity;metal ion binding;passive transmembrane transporter activity;protein binding;SNARE binding;substrate-specific channel activity;su…	calcium channel complex;cation channel complex;cell body;cell part;cell projection;cytoplasm;dendrite;integral to membrane;intracellular membrane-bounded organelle;intracellular organelle;intracellular part;intrinsic to membrane;ion channel complex;macromolecular complex;membrane;membrane part;membrane-bounded organelle;neuron projection;neuronal cell body;nucleus;organelle;plasma membrane;plasma…	1	1	1	2.6	2.6	2.6	53.135	0.0096578	2.0432	1379000000	8	A0A1B0GVX1;A0A1B0GUM7;K7EKF7;K7EQ95;A0A1B0GTI4;B5TYJ1;A0A1B0GVQ9;A0A1B0GU74;tr|A0A1U8CQ91|A0A1U8CQ91_MESAU;A0A1B0GTW2;A0A1B0GUS3;A0A1B0GU81;A0A1B0GTN7;A0A1C7CYY9;A0A087WW63;O00555-5;O00555-3;O00555-2;O00555-6;O00555-4;O00555;O00555-8	A0A1B0GVX1;A0A1B0GUM7;K7EKF7;K7EQ95;A0A1B0GTI4;B5TYJ1;A0A1B0GVQ9;A0A1B0GU74;tr|A0A1U8CQ91|A0A1U8CQ91_MESAU;A0A1B0GTW2;A0A1B0GUS3;A0A1B0GU81;A0A1B0GTN7;A0A1C7CYY9;A0A087WW63;O00555-5;O00555-3;O00555-2;O00555-6;O00555-4;O00555;O00555-8	Voltage-dependent P/Q-type calcium channel subunit alpha-1A	CACNA1A
0	0	0	0	0	0	4689200	0				Homo sapiens	anatomical structure homeostasis;biological regulation;cell cycle process;cellular component organization;cellular component organization at cellular level;cellular component organization or biogenesis;cellular component organization or biogenesis at cellular level;cellular homeostasis;cellular process;cognition;cytokinetic cell separation;cytokinetic process;endosome organization;endosome transp…	binding;protein binding;protein domain specific binding	cell part;cytoplasm;cytoplasmic part;cytosol;endosomal part;endosome membrane;ESCRT III complex;extracellular membrane-bounded organelle;extracellular organelle;extracellular region part;extracellular vesicular exosome;intracellular;intracellular membrane-bounded organelle;intracellular organelle;intracellular organelle part;intracellular part;late endosome membrane;macromolecular complex;membran…	1	1	1	9.5	9.5	9.5	11.714	0.0073343	2.2032	169750000	4	tr|A0A1U7QWZ2|A0A1U7QWZ2_MESAU;A0A087WW88;C9J0A7;Q9UQN3-2;Q9UQN3	tr|A0A1U7QWZ2|A0A1U7QWZ2_MESAU;A0A087WW88;C9J0A7;Q9UQN3-2;Q9UQN3	Charged multivesicular body protein 2b	CHMP2B
3801300	1681100	9997700	985360	14037000	6395400	5725000	1475000				Homo sapiens	biosynthetic process;cellular aromatic compound metabolic process;cellular biosynthetic process;cellular metabolic compound salvage;cellular metabolic process;cellular nitrogen compound biosynthetic process;cellular nitrogen compound metabolic process;cellular process;GMP metabolic process;heterocycle biosynthetic process;heterocycle metabolic process;metabolic process;nitrogen compound metabolic…	binding;catalytic activity;cation binding;GMP reductase activity;ion binding;metal ion binding;oxidoreductase activity;oxidoreductase activity, acting on NADH or NADPH;oxidoreductase activity, acting on NADH or NADPH, nitrogenous group as acceptor	cell part;cytoplasmic part;cytosol;intracellular part	4	4	4	12.7	12.7	12.7	33.921	0.00065253	3.5842	807010000	7	H0YMB3;H0YLV5;tr|A0A1U7REQ2|A0A1U7REQ2_MESAU;A0A087WWM4;F8WAN9;H0YNJ6;Q9P2T1;Q9P2T1-2;H0YK13;H0YK71;Q9P2T1-3;H0YN22;H0YMW6;H0YL68;H0YMR9;H0YMV5;H0YLB8;H0YNH0	H0YMB3;H0YLV5;tr|A0A1U7REQ2|A0A1U7REQ2_MESAU;A0A087WWM4;F8WAN9;H0YNJ6;Q9P2T1;Q9P2T1-2;H0YK13;H0YK71;Q9P2T1-3;H0YN22;H0YMW6	GMP reductase;GMP reductase 2	GMPR2
4459400	988550	2077600	0	1776700	5132800	1174100	924410				Homo sapiens	activation of immune response;activation of innate immune response;adaptive immune response;adaptive immune response based on somatic recombination of immune receptors built from immunoglobulin superfamily domains;anatomical structure formation involved in morphogenesis;antigen receptor-mediated signaling pathway;apoptosis;B cell apoptosis;B cell mediated immunity;biological regulation;cell death…	binding;enzyme binding;kinase binding;NF-kappaB binding;protease binding;protein binding;protein binding transcription factor activity;protein C-terminus binding;protein kinase B binding;protein kinase binding;protein self-association;small conjugating protein binding;transcription coactivator activity;transcription cofactor activity;transcription factor binding;transcription factor binding trans…	CBM complex;cell part;cytoplasm;cytoplasmic microtubule;cytoplasmic part;cytoskeletal part;cytosol;immunological synapse;intracellular membrane-bounded organelle;intracellular organelle;intracellular organelle part;intracellular part;lysosome;lytic vacuole;macromolecular complex;membrane;membrane part;membrane raft;membrane-bounded organelle;microtubule;nucleus;organelle;organelle part;perinuclea…	3	3	3	25	25	25	18.073	0	5.0699	213990000	7	A0A087WWW9;O95999;tr|A0A1U7R8R5|A0A1U7R8R5_MESAU	A0A087WWW9;O95999	B-cell lymphoma/leukemia 10	BCL10
0	196770	216130	129300	543870	841470	548240	386330				Homo sapiens	cellular process;establishment of localization;establishment of localization in cell;establishment of protein localization;intracellular protein transport;intracellular transport;protein transport;transport;vesicle-mediated transport	binding;cation binding;ion binding;metal ion binding;nucleotide binding;protein binding;SNARE binding;syntaxin binding;transition metal ion binding;zinc ion binding	actin filament;cell part;cytoplasmic membrane-bounded vesicle;cytoplasmic part;cytoplasmic vesicle;cytoskeletal part;early endosome;endocytic vesicle;endosomal part;endosome;endosome membrane;HOPS complex;intracellular membrane-bounded organelle;intracellular organelle;intracellular organelle part;intracellular part;late endosome;late endosome membrane;lysosomal membrane;lysosome;lytic vacuole;ma…	4	4	4	5	5	5	107.37	0.00034435	4.2977	336160000	5	B7Z879;tr|A0A1U7QCI6|A0A1U7QCI6_MESAU;A0A087WXL6;Q9H270;A0A087X2J4	B7Z879;tr|A0A1U7QCI6|A0A1U7QCI6_MESAU;A0A087WXL6;Q9H270;A0A087X2J4	Vacuolar protein sorting-associated protein 11 homolog	VPS11
113390000	16169000	32106000	15324000	28391000	76831000	7346000	58008000				Homo sapiens	biosynthetic process;catabolic process;cellular biosynthetic process;cellular catabolic process;cellular component disassembly;cellular component disassembly at cellular level;cellular component organization;cellular component organization at cellular level;cellular component organization or biogenesis;cellular component organization or biogenesis at cellular level;cellular macromolecular complex…	structural constituent of ribosome;structural molecule activity	cell part;cytoplasmic part;cytosol;cytosolic large ribosomal subunit;intracellular membrane-bounded organelle;intracellular organelle;intracellular organelle part;intracellular part;large ribosomal subunit;macromolecular complex;membrane-bounded organelle;nucleus;organelle;organelle part;ribonucleoprotein complex	6	6	6	35.5	35.5	35.5	19.586	0	323.31	22052000000	217	A0A087WXM6;J3QQT2;J3KRX5;tr|A0A1U7QD10|A0A1U7QD10_MESAU;A0A0A6YYL6;P18621;P18621-3;J3KRB3;A0A087WWH0;J3QS96;J3QLC8;A0A0A0MRF8;P18621-2;A0A087WY81;J3KSJ0	A0A087WXM6;J3QQT2;J3KRX5;tr|A0A1U7QD10|A0A1U7QD10_MESAU;A0A0A6YYL6;P18621;P18621-3;J3KRB3;A0A087WWH0;J3QS96;J3QLC8;A0A0A0MRF8;P18621-2;A0A087WY81	60S ribosomal protein L17	RPL17;RPL17-C18orf32
42522000	36081000	31580000	24205000	38997000	60266000	22431000	34680000				Homo sapiens	anion transport;biological regulation;cellular localization;cellular macromolecule localization;cellular macromolecule metabolic process;cellular metabolic process;cellular process;cellular protein localization;cellular protein metabolic process;cellular response to chemical stimulus;cellular response to organic substance;cellular response to stimulus;cellular response to stress;cellular response…	adenyl nucleotide binding;adenyl ribonucleotide binding;anion transmembrane transporter activity;arsenite transmembrane transporter activity;ATP binding;ATPase activity;binding;catalytic activity;cation binding;hydrolase activity;hydrolase activity, acting on acid anhydrides;hydrolase activity, acting on acid anhydrides, in phosphorus-containing anhydrides;inorganic anion transmembrane transporte…	cell part;cytoplasm;cytoplasmic part;endoplasmic reticulum;endoplasmic reticulum membrane;endoplasmic reticulum part;extracellular membrane-bounded organelle;extracellular organelle;extracellular region part;extracellular vesicular exosome;intracellular membrane-bounded organelle;intracellular non-membrane-bounded organelle;intracellular organelle;intracellular organelle part;intracellular part;m…	7	7	7	27.5	27.5	27.5	37.119	0	100.41	6841700000	78	A0A087WXS7;O43681;K7ERW9;tr|A0A1U8CT25|A0A1U8CT25_MESAU	A0A087WXS7;O43681	ATPase ASNA1	ASNA1
1697200	4070500	4307700	366690	6623500	6929200	216670	7021200				Homo sapiens	cellular component organization;cellular component organization or biogenesis;cellular membrane organization;cellular process;endocytosis;establishment of localization;lipid transport;membrane invagination;membrane organization;organic substance transport;transport;vesicle-mediated transport	alcohol binding;amine binding;binding;calcium ion binding;calcium-dependent phospholipid binding;cation binding;identical protein binding;ion binding;lipid binding;metal ion binding;phosphatidylcholine binding;phosphatidylethanolamine binding;phosphatidylinositol binding;phospholipid binding;protein binding;quaternary ammonium group binding	cell part;cytoplasmic part;endoplasmic reticulum part;extrinsic to internal side of plasma membrane;extrinsic to membrane;extrinsic to plasma membrane;integral to membrane;integral to plasma membrane;intracellular organelle part;intracellular part;intrinsic to endoplasmic reticulum membrane;intrinsic to membrane;intrinsic to organelle membrane;intrinsic to plasma membrane;membrane;membrane part;o…	11	11	11	17	17	17	98.008	0	25.573	1682100000	28	H7BXI1;A0A087WXU3;A0FGR8-2;A0FGR8;A0FGR8-6;tr|A0A1U8CLI8|A0A1U8CLI8_MESAU;A0FGR8-5;A0FGR8-4	H7BXI1;A0A087WXU3;A0FGR8-2;A0FGR8;A0FGR8-6;tr|A0A1U8CLI8|A0A1U8CLI8_MESAU;A0FGR8-5;A0FGR8-4	Extended synaptotagmin-2	ESYT2
0	1959700	0	732330	0	3724000	4631200	929650				Homo sapiens	actin cytoskeleton organization;actin filament-based process;anatomical structure development;biological regulation;biosynthetic process;catabolic process;cell communication;cell-cell signaling;cellular biosynthetic process;cellular catabolic process;cellular component organization;cellular component organization at cellular level;cellular component organization or biogenesis;cellular component o…	ATPase binding;binding;catalytic activity;cysteine-type peptidase activity;enzyme binding;exopeptidase activity;hydrolase activity;identical protein binding;omega peptidase activity;peptidase activity;peptidase activity, acting on L-amino acid peptides;protein binding;small conjugating protein-specific protease activity;ubiquitin protein ligase binding;ubiquitin-specific protease activity	cell part;cytoplasm;cytoplasmic part;cytosol;inclusion body;intracellular membrane-bounded organelle;intracellular organelle;intracellular organelle lumen;intracellular organelle part;intracellular part;membrane;membrane-bounded organelle;membrane-enclosed lumen;mitochondrial matrix;mitochondrial membrane;mitochondrial part;nuclear inclusion body;nuclear matrix;nuclear part;nucleoplasm;nucleus;or…	3	3	3	15.1	15.1	15.1	23.509	0.00065963	3.7208	110040000	4	E9PJN5;G3V4U9;A0A087WXY4;tr|A0A1U8BNC3|A0A1U8BNC3_MESAU;D3VVH9;tr|A0A1U8BWL8|A0A1U8BWL8_MESAU;A0A0A0MS38;A0A087X1A8;G3V3R7;tr|A0A1U8BVV4|A0A1U8BVV4_MESAU;tr|A0A1U7QIS4|A0A1U7QIS4_MESAU;tr|A0A1U8BKJ3|A0A1U8BKJ3_MESAU;F5H211;P54252-4;P54252-2;P54252;G3V3A6;D3VVP3;D6R9I5;G3V4B1;G3V390;G3V3S5;G3V4F5;G3V4F4;G3V5H3;G3V526;G3V2G1;G3V328;C9JQV6;P54252-3;G3V3T0;G3V2G2;S4R399;G3V3T6;P54252-5	E9PJN5;G3V4U9;A0A087WXY4;tr|A0A1U8BNC3|A0A1U8BNC3_MESAU;D3VVH9;tr|A0A1U8BWL8|A0A1U8BWL8_MESAU;A0A0A0MS38;A0A087X1A8;G3V3R7;tr|A0A1U8BVV4|A0A1U8BVV4_MESAU;tr|A0A1U7QIS4|A0A1U7QIS4_MESAU;tr|A0A1U8BKJ3|A0A1U8BKJ3_MESAU;F5H211;P54252-4;P54252-2;P54252;G3V3A6;D3VVP3;D6R9I5;G3V4B1;G3V390;G3V3S5;G3V4F5;G3V4F4;G3V5H3;G3V526;G3V2G1;G3V328;C9JQV6;P54252-3	Ataxin-3	ATXN3
930140	347280	1203500	0	544300	1782400	0	0				Homo sapiens	actin filament-based movement;actin filament-based process;anatomical structure morphogenesis;axon ensheathment;biological regulation;biosynthetic process;carboxylic acid biosynthetic process;carboxylic acid metabolic process;cell communication;cell differentiation;cell-cell signaling;cellular biosynthetic process;cellular component movement;cellular component organization;cellular component orga…	adenyl nucleotide binding;adenyl ribonucleotide binding;ATP binding;binding;calcium ion binding;catalytic activity;cation binding;enzyme binding;GTPase binding;hydrolase activity;hydrolase activity, acting on acid anhydrides;hydrolase activity, acting on acid anhydrides, in phosphorus-containing anhydrides;ion binding;metal ion binding;microfilament motor activity;motor activity;nucleoside-tripho…	actomyosin;cell body;cell part;cell projection;cell projection part;cilium;cytoplasm;cytoplasmic membrane-bounded vesicle;cytoplasmic part;cytoplasmic vesicle;cytoskeletal part;cytosol;extracellular membrane-bounded organelle;extracellular organelle;extracellular region part;extracellular vesicular exosome;filopodium tip;Golgi apparatus;growth cone;insulin-responsive compartment;intermediate fila…	3	3	3	1.8	1.8	1.8	210.88	0.00067797	4.1118	811640000	10	tr|A0A1U8C6X1|A0A1U8C6X1_MESAU;A0A087WY00;G3V394;F8WE88;F8W6H6;Q9Y4I1-2;Q9Y4I1;Q9Y4I1-3;Q9UES5;O95317;E7ERV5	tr|A0A1U8C6X1|A0A1U8C6X1_MESAU;A0A087WY00;G3V394;F8WE88;F8W6H6;Q9Y4I1-2;Q9Y4I1;Q9Y4I1-3	Unconventional myosin-Va	MYO5A
149040000	77783000	102800000	53843000	113660000	134890000	80613000	52619000				Homo sapiens	cellular component organization;cellular component organization or biogenesis;cellular process;endosome transport;establishment of localization;establishment of localization in cell;establishment of protein localization;intracellular transport;membrane organization;multivesicular body sorting pathway;non-lytic viral release;non-lytic virus budding;protein transport;release of virus from host;repr…	binding;protein binding;protein C-terminus binding	cell part;cytoplasmic part;cytosol;endosomal part;endosome membrane;extracellular membrane-bounded organelle;extracellular organelle;extracellular region part;extracellular vesicular exosome;intracellular organelle part;intracellular part;membrane;membrane-bounded organelle;membrane-bounded vesicle;organelle;organelle membrane;organelle part;vesicle	9	9	3	36.4	36.4	18.6	31.102	0	154.13	11638000000	87	A0A087WY55;Q9NP79;Q5TGM0;Q9NP79-2	A0A087WY55;Q9NP79	Vacuolar protein sorting-associated protein VTA1 homolog	VTA1
8559900	5943200	3863700	3571300	3672400	7568500	2526600	12492000				Homo sapiens	antigen processing and presentation;antigen processing and presentation of exogenous antigen;antigen processing and presentation of exogenous peptide antigen;antigen processing and presentation of exogenous peptide antigen via MHC class II;antigen processing and presentation of peptide antigen;antigen processing and presentation of peptide antigen via MHC class II;antigen processing and presentat…	binding;lipid binding;lipoprotein particle receptor binding;low-density lipoprotein particle receptor binding;peptide binding;protein binding;receptor binding;signal sequence binding;transporter activity	AP-2 adaptor complex;AP-type membrane coat adaptor complex;cell part;clathrin adaptor complex;clathrin coated vesicle membrane;clathrin-coated endocytic vesicle membrane;coated vesicle membrane;cytoplasmic part;cytoplasmic vesicle membrane;cytoplasmic vesicle part;cytosol;endocytic vesicle membrane;extracellular membrane-bounded organelle;extracellular organelle;extracellular region part;extracel…	4	4	4	10.4	10.4	10.4	49.526	0	5.3696	2689600000	6	A0A087WY71;tr|A0A1U7Q7D6|A0A1U7Q7D6_MESAU;E9PFW3;Q96CW1-2;Q96CW1;C9JJ47;C9JTK4;C9JGT8	A0A087WY71;tr|A0A1U7Q7D6|A0A1U7Q7D6_MESAU;E9PFW3;Q96CW1-2;Q96CW1;C9JJ47	AP-2 complex subunit mu	AP2M1
0	3553900	27706000	0	2799600	3850400	5654900	3012400				Homo sapiens	anatomical structure homeostasis;biological regulation;homeostatic process;multicellular organismal process;neurological system process;regulation of biological quality;retina homeostasis;sensory perception;sensory perception of light stimulus;system process;tissue homeostasis;visual perception		extracellular region part;extracellular space	1	1	1	10.2	10.2	10.2	16.89	0.0075907	2.1826	1019300000	11	A0A087WY73;Q16378	A0A087WY73;Q16378	Proline-rich protein 4	PRR4
162240000	71965000	139420000	0	0	101150000	0	29634000				Homo sapiens	activation of immune response;activation of innate immune response;apoptosis;biological regulation;biosynthetic process;BMP signaling pathway;catabolic process;cell death;cell surface receptor linked signaling pathway;cellular biosynthetic process;cellular catabolic process;cellular macromolecule biosynthetic process;cellular macromolecule catabolic process;cellular macromolecule metabolic proces…	acid-amino acid ligase activity;adenyl nucleotide binding;adenyl ribonucleotide binding;ATP binding;binding;catalytic activity;ligase activity;ligase activity, forming carbon-nitrogen bonds;nucleotide binding;purine nucleotide binding;purine ribonucleoside triphosphate binding;purine ribonucleotide binding;ribonucleotide binding;small conjugating protein ligase activity;ubiquitin-protein ligase a…	cell part;cytoplasmic part;cytosol;endosomal part;endosome membrane;extracellular membrane-bounded organelle;extracellular organelle;extracellular region part;extracellular vesicular exosome;intracellular organelle part;intracellular part;macromolecular complex;membrane;membrane-bounded organelle;membrane-bounded vesicle;nuclear part;nucleoplasm;organelle;organelle membrane;organelle part;plasma …	1	1	1	15.3	15.3	15.3	8.2133	0.0088692	2.0664	1138200000	2	D6RAW0;D6RFM0;D6RAH7;H9KV45;tr|A0A1U8CG12|A0A1U8CG12_MESAU;tr|A0A1U7QN88|A0A1U7QN88_MESAU;tr|A0A1U7QDI3|A0A1U7QDI3_MESAU;A0A0A0MQU3;A0A087WY85;P62837-2;P62837;P61077;P61077-2;P61077-3	D6RAW0;D6RFM0;D6RAH7;H9KV45;tr|A0A1U8CG12|A0A1U8CG12_MESAU;tr|A0A1U7QN88|A0A1U7QN88_MESAU;tr|A0A1U7QDI3|A0A1U7QDI3_MESAU;A0A0A0MQU3;A0A087WY85;P62837-2;P62837;P61077;P61077-2;P61077-3	Ubiquitin-conjugating enzyme E2 D2;Ubiquitin-conjugating enzyme E2 D3	UBE2D3;UBE2D2
1509300	230730	682820	216750	0	0	450340	380030				Homo sapiens	biological regulation;cellular process;endosome transport;establishment of localization;establishment of localization in cell;establishment of protein localization;intracellular transport;negative regulation of barbed-end actin filament capping;negative regulation of biological process;negative regulation of cellular component organization;protein transport;regulation of barbed-end actin filament…	binding;lipid binding;phosphatidylinositol binding;phosphatidylinositol-3,4,5-trisphosphate binding;phosphatidylinositol-3,4-bisphosphate binding;phosphatidylinositol-3,5-bisphosphate binding;phosphatidylinositol-3-phosphate binding;phosphatidylinositol-4,5-bisphosphate binding;phosphatidylinositol-4-phosphate binding;phosphatidylinositol-5-phosphate binding;phospholipid binding	cell part;cytoplasmic part;early endosome;early endosome membrane;endosomal part;endosome;endosome membrane;intracellular membrane-bounded organelle;intracellular organelle;intracellular organelle part;intracellular part;macromolecular complex;membrane;membrane-bounded organelle;organelle;organelle membrane;organelle part;plasma membrane;protein complex;WASH complex	6	6	6	8.8	8.8	8.8	136.57	0	16.018	549840000	7	A0A087WYF6;F8W7U3;J3KP36;E7ESD2;A0A0A0MR88;A0A096LPC5;Q9Y4E1-5;Q9Y4E1-3;Q9Y4E1-6;Q9Y4E1-2;Q9Y4E1;Q9Y4E1-4;Q641Q2-2;Q641Q2;A0A0A0MT65;tr|A0A1U8BR84|A0A1U8BR84_MESAU;B1AP61	A0A087WYF6;F8W7U3;J3KP36;E7ESD2;A0A0A0MR88;A0A096LPC5;Q9Y4E1-5;Q9Y4E1-3;Q9Y4E1-6;Q9Y4E1-2;Q9Y4E1;Q9Y4E1-4;Q641Q2-2;Q641Q2	WASH complex subunit FAM21C;WASH complex subunit FAM21A	FAM21A;FAM21C
8069600	0	0	3550800	0	0	3361600	5151600				Homo sapiens	biosynthetic process;cellular biosynthetic process;cellular macromolecule biosynthetic process;cellular macromolecule metabolic process;cellular metabolic process;cellular process;cellular protein metabolic process;cotranslational protein targeting to membrane;establishment of localization;establishment of localization in cell;establishment of protein localization;establishment of protein localiz…	7S RNA binding;binding;nucleic acid binding;RNA binding	cell part;cytoplasm;cytoplasmic part;cytosol;intracellular membrane-bounded organelle;intracellular non-membrane-bounded organelle;intracellular organelle;intracellular organelle part;intracellular part;macromolecular complex;membrane-bounded organelle;mitochondrion;non-membrane-bounded organelle;nuclear part;nucleolus;nucleoplasm;nucleus;organelle;organelle part;ribonucleoprotein complex;signal …	1	1	1	10	10	10	13.654	0.0057571	2.3379	583770000	7	A0A087WYR0;P09132	A0A087WYR0;P09132	Signal recognition particle 19 kDa protein	SRP19
180220000	156480000	226610000	64394000	211660000	313150016	145840000	89204000				Homo sapiens	biological regulation;regulation of biological process;regulation of cell proliferation;regulation of cellular process	binding;identical protein binding;protein binding;protein dimerization activity;protein heterodimerization activity;protein homodimerization activity	cell part;cytoplasm;cytoplasmic part;intracellular part;perinuclear region of cytoplasm	13	13	1	55	55	5.9	23.764	0	323.31	24540000000	128	A0A087WYR3;O43399;O43399-5;O43399-7;A0A087WZ51	A0A087WYR3;O43399;O43399-5;O43399-7;A0A087WZ51	Tumor protein D54	TPD52L2
126360000	99738000	135180000	47108000	174190000	236660000	127020000	88942000				Homo sapiens	alcohol metabolic process;biosynthetic process;carbohydrate biosynthetic process;carbohydrate metabolic process;carboxylic acid biosynthetic process;carboxylic acid metabolic process;cellular biosynthetic process;cellular carbohydrate biosynthetic process;cellular carbohydrate metabolic process;cellular glucan metabolic process;cellular glucuronidation;cellular ketone metabolic process;cellular m…	binding;carbohydrate binding;catalytic activity;cation binding;glucose binding;identical protein binding;ion binding;metal ion binding;monosaccharide binding;nucleotide binding;nucleotidyltransferase activity;protein binding;pyrimidine nucleotide binding;pyrimidine ribonucleotide binding;ribonucleotide binding;sugar binding;transferase activity;transferase activity, transferring phosphorus-contai…	cell part;cytoplasmic part;cytosol;extracellular membrane-bounded organelle;extracellular organelle;extracellular region part;extracellular vesicular exosome;intracellular membrane-bounded organelle;intracellular organelle;intracellular part;membrane-bounded organelle;membrane-bounded vesicle;nucleus;organelle;vesicle	22	22	1	51.8	51.8	3	56.967	0	323.31	29553000000	173	A0A087WYS1;E7EUC7;Q16851;tr|A0A1U8BNU7|A0A1U8BNU7_MESAU;tr|A0A1U7QBN3|A0A1U7QBN3_MESAU;C9JQU9;C9J6Q0	A0A087WYS1;E7EUC7;Q16851;tr|A0A1U8BNU7|A0A1U8BNU7_MESAU;tr|A0A1U7QBN3|A0A1U7QBN3_MESAU	UTP--glucose-1-phosphate uridylyltransferase	UGP2
156360000	54267000	104960000	27249000	116740000	219750000	61203000	18067000				Homo sapiens	anatomical structure development;anatomical structure homeostasis;arachidonic acid metabolic process;biological regulation;biosynthetic process;carbohydrate biosynthetic process;carbohydrate metabolic process;carboxylic acid biosynthetic process;carboxylic acid metabolic process;cell proliferation;cellular biosynthetic process;cellular carbohydrate biosynthetic process;cellular carbohydrate metab…	binding;catalytic activity;DNA polymerase activity;intramolecular oxidoreductase activity;isomerase activity;nucleotidyltransferase activity;prostaglandin-E synthase activity;protein binding;RNA-directed DNA polymerase activity;telomerase activity;transferase activity;transferase activity, transferring phosphorus-containing groups;unfolded protein binding	cell part;chromosomal part;chromosome, telomeric region;cytoplasm;cytoplasmic part;cytosol;extracellular membrane-bounded organelle;extracellular organelle;extracellular region part;extracellular vesicular exosome;intracellular membrane-bounded organelle;intracellular organelle;intracellular organelle part;intracellular part;macromolecular complex;membrane-bounded organelle;membrane-bounded vesic…	6	6	6	34.4	34.4	34.4	18.721	0	155.25	8603700000	33	tr|A0A1U7QS96|A0A1U7QS96_MESAU;A0A087WYT3;Q15185-3;Q15185-4;Q15185;B4DDC6;Q15185-2	tr|A0A1U7QS96|A0A1U7QS96_MESAU;A0A087WYT3;Q15185-3;Q15185-4;Q15185;B4DDC6	Prostaglandin E synthase 3	PTGES3
4345200	0	0	0	0	7916700	1918900	0				Homo sapiens	antigen processing and presentation;biological regulation;cellular component organization;cellular component organization or biogenesis;cellular process;cellular response to stimulus;establishment of localization;establishment of localization in cell;establishment of protein localization;immune system process;intracellular protein transport;intracellular signal transduction;intracellular transpor…	binding;catalytic activity;GDP binding;GTP binding;GTPase activity;guanyl nucleotide binding;guanyl ribonucleotide binding;hydrolase activity;hydrolase activity, acting on acid anhydrides;hydrolase activity, acting on acid anhydrides, in phosphorus-containing anhydrides;nucleoside-triphosphatase activity;nucleotide binding;protein transporter activity;purine nucleotide binding;purine ribonucleosi…	cell part;cytoplasmic membrane-bounded vesicle;cytoplasmic part;cytoplasmic vesicle;endosome;extracellular membrane-bounded organelle;extracellular organelle;extracellular region part;extracellular vesicular exosome;insulin-responsive compartment;intracellular membrane-bounded organelle;intracellular organelle;intracellular part;membrane;membrane-bounded organelle;membrane-bounded vesicle;organel…	2	2	2	20.4	20.4	20.4	12.505	0.0016051	3.4079	160880000	3	A0A087WYT5;tr|A0A1U7Q5D7|A0A1U7Q5D7_MESAU;P20338	A0A087WYT5;tr|A0A1U7Q5D7|A0A1U7Q5D7_MESAU;P20338	Ras-related protein Rab-4A	RAB4A
0	1144500	3355700	0	3232000	5469300	0	0				Homo sapiens		binding;nucleic acid binding;nucleotide binding	cell part;cytoplasm;intracellular membrane-bounded organelle;intracellular organelle;intracellular part;membrane-bounded organelle;nucleus;organelle	4	4	4	10.8	10.8	10.8	77.843	0	18.479	343780000	6	A0A087WZ13;E9PAU2;Q8IY67;Q8IY67-2;K7EKR9;tr|A0A1U7QT64|A0A1U7QT64_MESAU;Q8IY67-3	A0A087WZ13;E9PAU2;Q8IY67;Q8IY67-2;K7EKR9;tr|A0A1U7QT64|A0A1U7QT64_MESAU	Ribonucleoprotein PTB-binding 1	RAVER1
2538400	1678900	0	863740	2475600	7093200	2526200	3678800				Homo sapiens	biological regulation;positive regulation of biological process;positive regulation of cell adhesion;positive regulation of cell-matrix adhesion;positive regulation of cell-substrate adhesion;positive regulation of cellular process;regulation of biological process;regulation of cell adhesion;regulation of cell-matrix adhesion;regulation of cell-substrate adhesion;regulation of cellular process	1-phosphatidylinositol binding;binding;extracellular matrix binding;fibronectin binding;laminin binding;lipid binding;phosphatidylinositol binding;phospholipid binding;protein binding	cell part;cytoplasm;intracellular membrane-bounded organelle;intracellular organelle;intracellular part;macromolecular complex;membrane;membrane-bounded organelle;nucleus;organelle;plasma membrane;protein complex	4	4	4	12	12	12	41.21	0	6.4909	896170000	7	A0A087WZ32;A0A087X038;A8K727;Q9HB19;E5RHB5	A0A087WZ32;A0A087X038;A8K727;Q9HB19	Pleckstrin homology domain-containing family A member 2	PLEKHA2
0	1135100	0	0	0	0	0	0				Homo sapiens	actin cytoskeleton organization;actin cytoskeleton reorganization;actin filament-based process;biological adhesion;biological regulation;cell adhesion;cell junction assembly;cell junction organization;cell projection assembly;cell projection organization;cellular component assembly;cellular component assembly at cellular level;cellular component organization;cellular component organization at cel…		adherens junction;anchoring junction;cell junction;cell part;cell projection;cell-substrate adherens junction;cell-substrate junction;contractile fiber part;cytoplasmic part;cytoskeleton;cytosol;focal adhesion;intracellular non-membrane-bounded organelle;intracellular organelle;intracellular part;lamellipodium;membrane;non-membrane-bounded organelle;organelle;organelle part;plasma membrane;Z disc	3	2	2	13.5	9	9	33.257	0.0032535	2.5482	412860000	3	A0A087WZB5;tr|A0A1U8BTD6|A0A1U8BTD6_MESAU;Q9HBI1-3;Q9HBI1;Q9HBI1-2;B0QYP8	A0A087WZB5;tr|A0A1U8BTD6|A0A1U8BTD6_MESAU;Q9HBI1-3;Q9HBI1;Q9HBI1-2	Beta-parvin	PARVB
44973000	12788000	26900000	4378600	21814000	25773000	2202100	20046000				Homo sapiens	biological regulation;cellular component organization;cellular component organization at cellular level;cellular component organization or biogenesis;cellular component organization or biogenesis at cellular level;cellular process;chromatin modification;chromatin organization;chromosome organization;organelle organization;positive regulation of biological process;positive regulation of biosynthet…	binding;chromatin binding;DNA binding;hormone receptor binding;nuclear hormone receptor binding;nucleic acid binding;protein binding;receptor binding;thyroid hormone receptor binding;transcription factor binding	cell part;chromatin;chromosomal part;cytoplasm;intracellular membrane-bounded organelle;intracellular organelle;intracellular organelle part;intracellular part;membrane-bounded organelle;nuclear part;nucleoplasm;nucleus;organelle;organelle part	2	2	2	14.4	14.4	14.4	9.4226	0.0040984	2.4644	324250000	6	tr|A0A1U7QIE7|A0A1U7QIE7_MESAU;A0A087WZE9;Q15651-2;P05204;Q15651	tr|A0A1U7QIE7|A0A1U7QIE7_MESAU;A0A087WZE9;Q15651-2;P05204;Q15651	High mobility group nucleosome-binding domain-containing protein 3;Non-histone chromosomal protein HMG-17	HMGN3;HMGN2
45162000	33731000	34813000	10827000	47970000	57519000	13375000	36012000				Homo sapiens	biological regulation;biosynthetic process;cellular biosynthetic process;cellular component assembly;cellular component assembly at cellular level;cellular component organization;cellular component organization at cellular level;cellular component organization or biogenesis;cellular component organization or biogenesis at cellular level;cellular macromolecular complex assembly;cellular macromolec…	binding;nucleic acid binding;RNA binding;translation factor activity, nucleic acid binding;translation initiation factor activity	cell part;cytoplasmic part;cytosol;eukaryotic 43S preinitiation complex;eukaryotic 48S preinitiation complex;eukaryotic translation initiation factor 3 complex;eukaryotic translation initiation factor 3 complex, eIF3m;extracellular membrane-bounded organelle;extracellular organelle;extracellular region part;extracellular vesicular exosome;intracellular part;macromolecular complex;membrane;membran…	8	8	2	21.5	21.5	5.7	39.589	0	32.528	7624900000	47	A0A087WZK9;B3KS98;O15372;E5RJT0	A0A087WZK9;B3KS98;O15372;E5RJT0	Eukaryotic translation initiation factor 3 subunit H	EIF3H
3994900	8477000	8978700	929340	16307000	21908000	977350	10084000				Homo sapiens	catabolic process;cellular catabolic process;cellular macromolecule catabolic process;cellular macromolecule metabolic process;cellular metabolic process;cellular nitrogen compound metabolic process;cellular process;macromolecule catabolic process;macromolecule metabolic process;metabolic process;nitrogen compound metabolic process;nucleic acid metabolic process;nucleobase-containing compound met…	binding;catalytic activity;endonuclease activity;endonuclease activity, active with either ribo- or deoxyribonucleic acids and producing 3'-phosphomonoesters;endoribonuclease activity;endoribonuclease activity, producing 3'-phosphomonoesters;hydrolase activity;hydrolase activity, acting on ester bonds;nuclease activity;nucleic acid binding;ribonuclease activity;ribonuclease T2 activity;RNA binding	cell part;cytoplasmic part;endoplasmic reticulum lumen;endoplasmic reticulum part;extracellular membrane-bounded organelle;extracellular organelle;extracellular region;extracellular region part;extracellular space;extracellular vesicular exosome;intracellular membrane-bounded organelle;intracellular organelle;intracellular organelle lumen;intracellular organelle part;intracellular part;lysosomal …	4	4	4	18.8	18.8	18.8	25.308	0	194.41	955970000	9	D6REQ6;D6RHI9;A0A087WZM2;O00584;H0YAE9	D6REQ6;D6RHI9;A0A087WZM2;O00584;H0YAE9	Ribonuclease T2	RNASET2
0	0	0	0	0	0	2171500	12412000				Homo sapiens	cellular metabolic process;cellular process;metabolic process;methylation;one-carbon metabolic process;small molecule metabolic process	catalytic activity;methyltransferase activity;S-adenosylmethionine-dependent methyltransferase activity;transferase activity;transferase activity, transferring one-carbon groups	cell part;cytoplasm;intracellular part	2	2	2	8.7	8.7	8.7	31.288	0.0035419	2.5379	166700000	1	A0A087WZT2;Q6UX53	A0A087WZT2;Q6UX53	Methyltransferase-like protein 7B	METTL7B
251620	0	0	0	0	498400	732660	0				Homo sapiens	alcohol metabolic process;carbohydrate metabolic process;cellular carbohydrate metabolic process;cellular metabolic process;cellular process;inositol metabolic process;inositol phosphate metabolic process;metabolic process;organophosphate metabolic process;polyol metabolic process;primary metabolic process;small molecule metabolic process	acid phosphatase activity;adenyl nucleotide binding;adenyl ribonucleotide binding;ATP binding;binding;catalytic activity;diphosphoinositol-pentakisphosphate kinase activity;hydrolase activity;hydrolase activity, acting on ester bonds;inositol 1,3,4,5,6-pentakisphosphate kinase activity;inositol hexakisphosphate 1-kinase activity;inositol hexakisphosphate 3-kinase activity;inositol hexakisphosphat…	cell part;cytoplasmic part;cytosol;intracellular part	4	4	3	4.2	4.2	3.1	144.36	0	6.1074	134530000	6	A0A087WZV0;O43314-2;O43314;H0Y9S9;tr|A0A1U8CUC6|A0A1U8CUC6_MESAU;tr|A0A1U8D376|A0A1U8D376_MESAU;tr|A0A1U8D1T2|A0A1U8D1T2_MESAU;tr|A0A1U8CRI5|A0A1U8CRI5_MESAU;tr|A0A1U7R8D1|A0A1U7R8D1_MESAU;D6RFG4;tr|A0A1U8CRJ9|A0A1U8CRJ9_MESAU;tr|A0A1U7QXK4|A0A1U7QXK4_MESAU;D6RBU4;tr|A0A1U8BWZ0|A0A1U8BWZ0_MESAU;tr|A0A1U8BW83|A0A1U8BW83_MESAU;tr|A0A1U8BKV8|A0A1U8BKV8_MESAU;tr|A0A1U8BJW8|A0A1U8BJW8_MESAU;tr|A0A1U7Q…	A0A087WZV0;O43314-2;O43314;H0Y9S9;tr|A0A1U8CUC6|A0A1U8CUC6_MESAU;tr|A0A1U8D376|A0A1U8D376_MESAU;tr|A0A1U8D1T2|A0A1U8D1T2_MESAU;tr|A0A1U8CRI5|A0A1U8CRI5_MESAU;tr|A0A1U7R8D1|A0A1U7R8D1_MESAU	Inositol hexakisphosphate and diphosphoinositol-pentakisphosphate kinase 2	PPIP5K2
1122800	7376100	1994700	1655700	5496000	7298700	676610	135060				Homo sapiens	anatomical structure development;anatomical structure formation involved in morphogenesis;anatomical structure morphogenesis;anterior/posterior pattern specification;antigen processing and presentation;antigen processing and presentation of exogenous antigen;antigen processing and presentation of exogenous peptide antigen;antigen processing and presentation of exogenous peptide antigen via MHC cl…	adenyl nucleotide binding;adenyl ribonucleotide binding;ATP binding;ATPase activity;binding;catalytic activity;cytoskeletal protein binding;hydrolase activity;hydrolase activity, acting on acid anhydrides;hydrolase activity, acting on acid anhydrides, in phosphorus-containing anhydrides;microtubule motor activity;motor activity;nucleoside-triphosphatase activity;nucleotide binding;plus-end-direct…	axoneme;axoneme part;cell part;cell projection;cell projection part;centrosome;cilium;clathrin-coated vesicle;coated vesicle;cytoplasmic membrane-bounded vesicle;cytoplasmic part;cytoplasmic vesicle;cytoskeletal part;cytoskeleton;cytosol;extracellular membrane-bounded organelle;extracellular organelle;extracellular region part;extracellular vesicular exosome;intracellular membrane-bounded organel…	4	4	4	5.2	5.2	5.2	79.951	0	6.1736	1363300000	7	tr|A0A1U7QHX7|A0A1U7QHX7_MESAU;tr|A0A1U7Q8P4|A0A1U7Q8P4_MESAU;J3KPF9;tr|A0A1U8BV89|A0A1U8BV89_MESAU;A0A087X011;tr|A0A1U7Q489|A0A1U7Q489_MESAU;E9PES4;Q9Y496;H7C2F6	tr|A0A1U7QHX7|A0A1U7QHX7_MESAU;tr|A0A1U7Q8P4|A0A1U7Q8P4_MESAU;J3KPF9;tr|A0A1U8BV89|A0A1U8BV89_MESAU;A0A087X011;tr|A0A1U7Q489|A0A1U7Q489_MESAU;E9PES4;Q9Y496;H7C2F6	Kinesin-like protein;Kinesin-like protein KIF3A	KIF3A
30538000	2421300	8325600	5754500	11729000	25865000	17752000	5037300				Homo sapiens	anatomical structure development;biological regulation;biomineral tissue development;bone marrow development;bone mineralization;cell chemotaxis;cell cycle process;cell migration;cell motility;cell proliferation;cellular component assembly;cellular component assembly at cellular level;cellular component biogenesis;cellular component biogenesis at cellular level;cellular component movement;cellula…	binding;cytoskeletal protein binding;microtubule binding;nucleic acid binding;protein binding;ribonucleoprotein binding;ribosome binding;RNA binding;rRNA binding;tubulin binding	cell part;cytoplasm;cytoskeletal part;intracellular membrane-bounded organelle;intracellular non-membrane-bounded organelle;intracellular organelle;intracellular organelle part;intracellular part;membrane-bounded organelle;non-membrane-bounded organelle;nuclear part;nucleolus;nucleoplasm;nucleus;organelle;organelle part;spindle pole	9	9	6	35.6	35.6	24.4	28.864	0	19.604	6956100000	46	A0A087X020;Q9Y3A5;F8WE72;tr|A0A1U8C9S8|A0A1U8C9S8_MESAU	A0A087X020;Q9Y3A5	Ribosome maturation protein SBDS	SBDS
5173300	34613000	15000000	748340	39962000	8860300	9056500	22905000				Homo sapiens	adaptive immune response;adaptive immune response based on somatic recombination of immune receptors built from immunoglobulin superfamily domains;anatomical structure development;anatomical structure homeostasis;anatomical structure morphogenesis;antigen processing and presentation;biological regulation;bradykinin catabolic process;catabolic process;cell killing;cellular catabolic process;cellul…	activating MHC class I receptor activity;aminopeptidase activity;apoptotic protease activator activity;binding;caspase activator activity;caspase regulator activity;catalytic activity;cysteine-type endopeptidase activity;cysteine-type peptidase activity;endopeptidase activity;enzyme activator activity;enzyme regulator activity;exopeptidase activity;HLA-A specific activating MHC class I receptor a…	acrosomal vesicle;axoneme part;cell part;cell projection part;cytoplasmic membrane-bounded vesicle;cytoplasmic part;cytoplasmic vesicle;cytosol;extracellular membrane-bounded organelle;extracellular organelle;extracellular region part;extracellular space;extracellular vesicular exosome;intracellular membrane-bounded organelle;intracellular organelle;intracellular part;lysosome;lytic vacuole;membr…	2	2	2	8	8	8	36.269	0	61.485	2171200000	17	A0A087X0D5;P09668;E9PKT6;tr|A0A1U7R496|A0A1U7R496_MESAU	A0A087X0D5;P09668;E9PKT6;tr|A0A1U7R496|A0A1U7R496_MESAU	Pro-cathepsin H;Cathepsin H mini chain;Cathepsin H;Cathepsin H heavy chain;Cathepsin H light chain	CTSH
3485000	2520700	3292000	0	1610700	5681000	279500	2477500				Homo sapiens			cell part;cytoplasm;intracellular membrane-bounded organelle;intracellular organelle;intracellular organelle part;intracellular part;membrane;membrane-bounded organelle;nuclear part;nucleoplasm;nucleus;organelle;organelle part;plasma membrane	8	8	8	13.7	13.7	13.7	82.89	0	94.15	866650000	26	A0A087X0M4;Q9BWU0;tr|A0A1U8C6K1|A0A1U8C6K1_MESAU;H7C256;A0A087WWF4	A0A087X0M4;Q9BWU0;tr|A0A1U8C6K1|A0A1U8C6K1_MESAU	Kanadaptin	SLC4A1AP
12270000	2221600	5901200	3524100	4492400	6185000	2140100	4787900				Homo sapiens				6	6	5	12.9	12.9	11.3	63.674	0	17.116	1737400000	24	A0A087X0Q1;Q7Z739;A0A024R7W5;tr|A0A1U7RKI4|A0A1U7RKI4_MESAU;A0A087WY31;Q9BYJ9;A0A087X0C3;S4R373	A0A087X0Q1;Q7Z739;A0A024R7W5;tr|A0A1U7RKI4|A0A1U7RKI4_MESAU;A0A087WY31	YTH domain-containing family protein 3	YTHDF3
22608000	7677000	7693100	6354800	20020000	17484000	10679000	6876400				Homo sapiens	biological regulation;cellular component organization;cellular component organization at cellular level;cellular component organization or biogenesis;cellular component organization or biogenesis at cellular level;cellular membrane organization;cellular process;endocytosis;establishment of localization;establishment of protein localization;membrane invagination;membrane organization;negative regu…	binding;enzyme binding;lipid binding;phosphatidylinositol binding;phospholipid binding;protein binding	cell part;cytoplasmic part;early endosome;endosome;extracellular membrane-bounded organelle;extracellular organelle;extracellular region part;extracellular vesicular exosome;extrinsic to membrane;intracellular membrane-bounded organelle;intracellular organelle;intracellular part;membrane part;membrane-bounded organelle;membrane-bounded vesicle;organelle;vesicle	3	3	3	18.1	18.1	18.1	19.246	0.00066094	3.7504	1036100000	8	tr|A0A1U7QL55|A0A1U7QL55_MESAU;A0A087X0R6;Q9UMY4-3;Q9UMY4-2;Q9UMY4	tr|A0A1U7QL55|A0A1U7QL55_MESAU;A0A087X0R6;Q9UMY4-3;Q9UMY4-2;Q9UMY4	Sorting nexin-12	SNX12
31059000	17848000	27602000	2737200	22666000	54089000	3979600	12486000				Homo sapiens	axon guidance;biological adhesion;cell adhesion;cell differentiation;cellular component assembly;cellular component disassembly;cellular component disassembly at cellular level;cellular component organization;cellular component organization at cellular level;cellular component organization or biogenesis;cellular component organization or biogenesis at cellular level;cellular developmental process…	binding;growth factor binding;platelet-derived growth factor binding;protein binding	anchoring collagen;cell part;collagen;collagen type VI;cytoplasmic part;endoplasmic reticulum lumen;endoplasmic reticulum part;extracellular matrix;extracellular matrix part;extracellular membrane-bounded organelle;extracellular organelle;extracellular region;extracellular region part;extracellular vesicular exosome;intracellular organelle lumen;intracellular organelle part;intracellular part;lys…	11	11	11	13.5	13.5	13.5	108.34	0	301.8	9502100000	74	A0A087X0S5;P12109;tr|D0G6X1|D0G6X1_MESAU	A0A087X0S5;P12109	Collagen alpha-1(VI) chain	COL6A1
5023600	1097900	0	684730	539990	3887200	2873000	1026700				Homo sapiens	biological regulation;biosynthetic process;carbohydrate metabolic process;catabolic process;cell surface receptor linked signaling pathway;cellular biosynthetic process;cellular carbohydrate metabolic process;cellular catabolic process;cellular macromolecule catabolic process;cellular macromolecule metabolic process;cellular metabolic process;cellular nitrogen compound biosynthetic process;cellul…	2'-5'-oligoadenylate synthetase activity;adenyl nucleotide binding;adenyl ribonucleotide binding;adenylyltransferase activity;ATP binding;binding;catalytic activity;cation binding;double-stranded RNA binding;ion binding;metal ion binding;nucleic acid binding;nucleotide binding;nucleotidyltransferase activity;purine nucleotide binding;purine ribonucleoside triphosphate binding;purine ribonucleotid…	cell part;cytoplasm;cytoplasmic part;cytosol;endoplasmic reticulum;intracellular membrane-bounded organelle;intracellular organelle;intracellular part;membrane;membrane-bounded organelle;mitochondrion;nucleus;organelle;perinuclear region of cytoplasm	5	5	5	9.6	9.6	9.6	83.234	0	10.298	2350500000	21	A0A087X0V5;P29728-2;P29728;F8W1C5	A0A087X0V5;P29728-2;P29728	2-5-oligoadenylate synthase 2	OAS2
2305100	6629800	10484000	0	9523400	17516000	1220500	5919000				Homo sapiens	acyl-CoA metabolic process;carboxylic acid metabolic process;cellular ketone metabolic process;cellular lipid metabolic process;cellular metabolic process;cellular process;coenzyme metabolic process;cofactor metabolic process;fatty acid metabolic process;lipid metabolic process;long-chain fatty acid metabolic process;metabolic process;monocarboxylic acid metabolic process;organic acid metabolic p…	acyl-CoA hydrolase activity;acyl-CoA thioesterase activity;binding;carboxylic ester hydrolase activity;catalytic activity;CoA hydrolase activity;hydrolase activity;hydrolase activity, acting on ester bonds;palmitoyl-CoA hydrolase activity;protein binding;receptor binding;thiolester hydrolase activity	cell part;cytoplasmic part;cytosol;extracellular membrane-bounded organelle;extracellular organelle;extracellular region part;extracellular vesicular exosome;intracellular membrane-bounded organelle;intracellular organelle;intracellular part;membrane-bounded organelle;membrane-bounded vesicle;mitochondrion;organelle;vesicle	7	7	7	20	20	20	46.292	0	14.061	1350400000	14	A0A087X0W7;Q86TX2;G3V4F2;A0A087WT95;P49753;P49753-2	A0A087X0W7;Q86TX2;G3V4F2;A0A087WT95;P49753	Acyl-coenzyme A thioesterase 1;Acyl-coenzyme A thioesterase 2, mitochondrial	ACOT2;ACOT1
2882200	10008000	6626200	470190	8276500	11754000	440110	62771000				Homo sapiens	alternative nuclear mRNA splicing, via spliceosome;cellular macromolecule metabolic process;cellular metabolic process;cellular nitrogen compound metabolic process;cellular process;gene expression;macromolecule metabolic process;metabolic process;mRNA metabolic process;mRNA processing;nitrogen compound metabolic process;nuclear mRNA splicing, via spliceosome;nucleic acid metabolic process;nucleob…	binding;nucleic acid binding;nucleotide binding;protein binding;protein domain specific binding;RNA binding	catalytic step 2 spliceosome;cell part;extracellular matrix;extracellular membrane-bounded organelle;extracellular organelle;extracellular region part;extracellular vesicular exosome;integral to membrane;integral to plasma membrane;intracellular non-membrane-bounded organelle;intracellular organelle;intracellular organelle part;intracellular part;intrinsic to membrane;intrinsic to plasma membrane…	24	24	8	41.4	41.4	15.2	77.569	0	250.61	16435000000	158	A0A087X0X3;P52272-2;P52272;M0QZM1;M0R019;M0R2T0;M0R2I7;M0QYQ7;M0R0N3;M0R0Y6;M0QY96;M0QYL3	A0A087X0X3;P52272-2;P52272;M0QZM1	Heterogeneous nuclear ribonucleoprotein M	HNRNPM
20813000	15292000	14648000	7434600	16129000	20243000	23113000	8439600				Homo sapiens	cell chemotaxis;cell migration;cell motility;cellular component assembly;cellular component movement;cellular component organization;cellular component organization or biogenesis;cellular membrane organization;cellular process;cellular response to chemical stimulus;cellular response to stimulus;chemotaxis;locomotion;macromolecular complex assembly;macromolecular complex subunit organization;membr…	binding;lipid binding;phospholipid binding	cell cortex;cell junction;cell part;cell projection;cytoplasm;cytoplasmic part;cytoskeletal part;intracellular non-membrane-bounded organelle;intracellular organelle;intracellular organelle part;intracellular part;macromolecular complex;membrane part;non-membrane-bounded organelle;organelle;organelle part;phagocytic cup;plasma membrane part;podosome;protein complex	12	12	11	32.8	32.8	31.4	59.744	0	58.886	3170800000	55	A0A0A0MT10;A0A087X188;Q9UBW5-2;Q9UBW5;S4R418;F5H0W4;tr|A0A1U8BK74|A0A1U8BK74_MESAU;S4R3J0	A0A0A0MT10;A0A087X188;Q9UBW5-2;Q9UBW5;S4R418;F5H0W4	Bridging integrator 2	BIN2
0	435880	0	177170	1461900	4377500	0	1101800				Homo sapiens	biological regulation;cellular localization;cellular macromolecule localization;cellular process;chemical homeostasis;homeostatic process;interaction with host;interspecies interaction between organisms;intracellular mRNA localization;localization;macromolecule localization;multi-organism process;positive regulation of biological process;positive regulation of reproductive process;positive regula…	binding;double-stranded RNA binding;nucleic acid binding;RNA binding	cell body;cell part;cell projection;cytoplasm;cytoplasmic part;cytoskeletal part;dendrite;endoplasmic reticulum;extracellular membrane-bounded organelle;extracellular organelle;extracellular region part;extracellular vesicular exosome;intracellular membrane-bounded organelle;intracellular non-membrane-bounded organelle;intracellular organelle;intracellular organelle part;intracellular part;macrom…	3	3	3	8.1	8.1	8.1	54.945	0.00035753	4.9184	221680000	5	A0A087X1A5;Q5JW30;O95793-2;O95793-3;O95793;F6UDC6;Q5JW28;tr|A0A1U8C980|A0A1U8C980_MESAU;tr|A0A1U7QI61|A0A1U7QI61_MESAU;tr|A0A1U8C164|A0A1U8C164_MESAU	A0A087X1A5;Q5JW30;O95793-2;O95793-3;O95793	Double-stranded RNA-binding protein Staufen homolog 1	STAU1
0	1794400	0	0	0	0	0	18189000				Homo sapiens	biological regulation;biosynthetic process;cellular biosynthetic process;cellular macromolecule biosynthetic process;cellular macromolecule metabolic process;cellular metabolic process;cellular nitrogen compound metabolic process;cellular process;establishment of localization;establishment of localization in cell;establishment of RNA localization;intracellular transport;macromolecule biosynthetic…		cell part;intracellular membrane-bounded organelle;intracellular non-membrane-bounded organelle;intracellular organelle;intracellular organelle part;intracellular part;macromolecular complex;membrane-bounded organelle;non-membrane-bounded organelle;nuclear body;nuclear part;nuclear speck;nucleolus;nucleoplasm;nucleoplasm part;organelle;organelle part;protein complex;transcription export complex	2	2	2	38.2	38.2	38.2	8.5199	0	14.768	99918000	2	A0A087X1B7;tr|A0A1U8C9F9|A0A1U8C9F9_MESAU;tr|A0A1U8C9H3|A0A1U8C9H3_MESAU;X6R700;tr|A0A1U7QT43|A0A1U7QT43_MESAU;tr|A0A1U7QJK6|A0A1U7QJK6_MESAU;Q9Y3Y2-4;Q9Y3Y2;Q9Y3Y2-3;Q5T7Y7	A0A087X1B7;tr|A0A1U8C9F9|A0A1U8C9F9_MESAU;tr|A0A1U8C9H3|A0A1U8C9H3_MESAU;X6R700;tr|A0A1U7QT43|A0A1U7QT43_MESAU;tr|A0A1U7QJK6|A0A1U7QJK6_MESAU;Q9Y3Y2-4;Q9Y3Y2;Q9Y3Y2-3;Q5T7Y7	Chromatin target of PRMT1 protein	CHTOP
0	1500000	856270	467030	776960	3040800	1751000	1721500				Homo sapiens	actin cytoskeleton organization;actin filament-based process;biological regulation;cell projection assembly;cell projection organization;cellular component assembly;cellular component assembly at cellular level;cellular component movement;cellular component organization;cellular component organization at cellular level;cellular component organization or biogenesis;cellular component organization …	binding;enzyme binding;GTP binding;GTPase binding;GTP-dependent protein binding;guanyl nucleotide binding;guanyl ribonucleotide binding;lipid binding;nucleotide binding;phosphatidylinositol binding;phosphatidylinositol-4-phosphate binding;phospholipid binding;protein binding;purine nucleotide binding;purine ribonucleoside triphosphate binding;purine ribonucleotide binding;Rac GTPase binding;Ras G…	cell cortex;cell part;cell projection;cytoplasm;cytoplasmic part;Golgi apparatus part;Golgi membrane;intracellular organelle part;intracellular part;membrane;organelle membrane;organelle part;plasma membrane;ruffle;trans-Golgi network membrane	3	3	3	10.7	10.7	10.7	41.595	0	15.759	271730000	3	A0A087X1E4;P53365-3;P53365;tr|A0A1U8CQI9|A0A1U8CQI9_MESAU;tr|A0A1U8CQD2|A0A1U8CQD2_MESAU;P53365-2;E9PPY7;E9PRV8	A0A087X1E4;P53365-3;P53365;tr|A0A1U8CQI9|A0A1U8CQI9_MESAU;tr|A0A1U8CQD2|A0A1U8CQD2_MESAU;P53365-2	Arfaptin-2	ARFIP2
3474900	3094500	5072200	0	8506300	6668100	0	2228000				Homo sapiens	cellular macromolecule metabolic process;cellular metabolic process;cellular process;cellular protein metabolic process;'de novo' posttranslational protein folding;'de novo' protein folding;macromolecule metabolic process;metabolic process;primary metabolic process;protein folding;protein metabolic process	binding;selenium binding	cell part;cytoplasmic part;endoplasmic reticulum lumen;endoplasmic reticulum part;extracellular membrane-bounded organelle;extracellular organelle;extracellular region part;extracellular vesicular exosome;intracellular organelle lumen;intracellular organelle part;intracellular part;membrane-bounded organelle;membrane-bounded vesicle;membrane-enclosed lumen;organelle;organelle lumen;organelle part…	2	2	2	15.4	15.4	15.4	17.881	0.000342	4.2131	301600000	8	tr|A0A1U7R6G8|A0A1U7R6G8_MESAU;A0A087X1G7;A0A0B4J1S4;O60613;A0A0J9YX89	tr|A0A1U7R6G8|A0A1U7R6G8_MESAU;A0A087X1G7;A0A0B4J1S4;O60613;A0A0J9YX89	15 kDa selenoprotein	2021-09-15
2438000	2745800	2690400	1881000	2671700	890350	4545500	1453800				Homo sapiens		binding;cation binding;enzyme activator activity;enzyme regulator activity;GTPase activator activity;GTPase regulator activity;ion binding;metal ion binding;nucleoside-triphosphatase regulator activity;transition metal ion binding;zinc ion binding	cell part;cytoplasmic part;endosomal part;endosome membrane;intracellular organelle part;intracellular part;membrane;organelle membrane;organelle part	7	7	7	11.5	11.5	11.5	88.02	0	14.171	1108500000	17	A0A087X1H5;Q15057;A0A0U1RQT1;tr|A0A1U8BRZ8|A0A1U8BRZ8_MESAU;tr|A0A1U7QRR4|A0A1U7QRR4_MESAU;tr|A0A1U7QP29|A0A1U7QP29_MESAU;tr|A0A1U8BRM9|A0A1U8BRM9_MESAU;tr|A0A1U8BV71|A0A1U8BV71_MESAU;tr|A0A1U8C346|A0A1U8C346_MESAU;tr|A0A1U8BRZ3|A0A1U8BRZ3_MESAU;tr|A0A1U8BRM5|A0A1U8BRM5_MESAU;H7C3Q8;H7C3K3	A0A087X1H5;Q15057;A0A0U1RQT1;tr|A0A1U8BRZ8|A0A1U8BRZ8_MESAU;tr|A0A1U7QRR4|A0A1U7QRR4_MESAU;tr|A0A1U7QP29|A0A1U7QP29_MESAU;tr|A0A1U8BRM9|A0A1U8BRM9_MESAU;tr|A0A1U8BV71|A0A1U8BV71_MESAU;tr|A0A1U8C346|A0A1U8C346_MESAU;tr|A0A1U8BRZ3|A0A1U8BRZ3_MESAU;tr|A0A1U8BRM5|A0A1U8BRM5_MESAU;H7C3Q8	Arf-GAP with coiled-coil, ANK repeat and PH domain-containing protein 2	ACAP2
2390600	1042900	1452400	655300	763290	3108400	2512100	166440				Homo sapiens			extracellular membrane-bounded organelle;extracellular organelle;extracellular region part;extracellular vesicular exosome;membrane-bounded organelle;membrane-bounded vesicle;organelle;vesicle	4	4	4	6	6	6	91.818	0	170.7	634650000	13	A0A087X1I8;Q7Z3E5-2;Q7Z3E5;H7C3U7;H7BZY2;C9J535;H7BZA2;tr|A0A1U8CQX2|A0A1U8CQX2_MESAU;C9JW07	A0A087X1I8;Q7Z3E5-2;Q7Z3E5;H7C3U7;H7BZY2;C9J535;H7BZA2;tr|A0A1U8CQX2|A0A1U8CQX2_MESAU	LisH domain-containing protein ARMC9	ARMC9
105100000	52919000	94204000	39832000	109140000	122860000	50701000	40532000				Homo sapiens	biological regulation;carboxylic acid metabolic process;catabolic process;cellular catabolic process;cellular ketone metabolic process;cellular lipid metabolic process;cellular macromolecule catabolic process;cellular macromolecule metabolic process;cellular metabolic process;cellular process;cellular protein metabolic process;fatty acid metabolic process;lipid metabolic process;lipoprotein catab…	carboxylic ester hydrolase activity;catalytic activity;hydrolase activity;hydrolase activity, acting on ester bonds;lipase activity;lysophospholipase activity;palmitoyl-(protein) hydrolase activity;phospholipase activity;thiolester hydrolase activity	cell part;cytoplasmic part;cytosol;extracellular membrane-bounded organelle;extracellular organelle;extracellular region part;extracellular vesicular exosome;intracellular membrane-bounded organelle;intracellular organelle;intracellular part;membrane-bounded organelle;membrane-bounded vesicle;mitochondrion;organelle;vesicle	3	3	3	19.3	19.3	19.3	17.981	0	5.7134	6230100000	23	A0A087X1K9;E5RGR0;O75608-2;O75608;B4DP64;E5RJ48;E5RI35;tr|A0A1U7QTZ0|A0A1U7QTZ0_MESAU	A0A087X1K9;E5RGR0;O75608-2;O75608;B4DP64	Acyl-protein thioesterase 1	LYPLA1
6486300	1792900	3017100	709220	3567800	0	3561700	0				Homo sapiens	biological regulation;positive regulation of biological process;positive regulation of cell differentiation;positive regulation of cellular process;positive regulation of developmental process;positive regulation of erythrocyte differentiation;positive regulation of myeloid cell differentiation;regulation of biological process;regulation of cell differentiation;regulation of cellular component or…	binding;cation binding;enzyme activator activity;enzyme regulator activity;GTPase activator activity;GTPase regulator activity;ion binding;metal ion binding;nucleoside-triphosphatase regulator activity;transition metal ion binding;zinc ion binding	cell part;cytoplasm;intracellular part;membrane;plasma membrane	3	2	2	7.5	5.7	5.7	47.796	0.00067476	4.0235	172220000	3	tr|A0A1U7R5R9|A0A1U7R5R9_MESAU;A0A087X1X9;tr|A0A1U7RG70|A0A1U7RG70_MESAU;Q8IYB5-3;Q8IYB5-2;Q8IYB5	tr|A0A1U7R5R9|A0A1U7R5R9_MESAU;A0A087X1X9;tr|A0A1U7RG70|A0A1U7RG70_MESAU;Q8IYB5-3;Q8IYB5-2;Q8IYB5	Stromal membrane-associated protein 1	SMAP1
432409984	334510016	467860000	166780000	651980032	459950016	272040000	343740000				Homo sapiens	activation of immune response;activation of innate immune response;anaphase-promoting complex-dependent proteasomal ubiquitin-dependent protein catabolic process;antigen processing and presentation;antigen processing and presentation of exogenous antigen;antigen processing and presentation of exogenous peptide antigen;antigen processing and presentation of exogenous peptide antigen via MHC class …		cell part;cytoplasmic part;cytosol;extracellular membrane-bounded organelle;extracellular organelle;extracellular region part;extracellular vesicular exosome;intracellular organelle part;intracellular part;macromolecular complex;membrane;membrane-bounded organelle;membrane-bounded vesicle;nuclear part;nucleoplasm;organelle;organelle part;proteasome activator complex;proteasome complex;protein com…	14	14	14	64.2	64.2	64.2	29.126	0	323.31	49432000000	152	A0A087X1Z3;Q9UL46;H0YM70;tr|A0A1U7REP6|A0A1U7REP6_MESAU;H0YKU2;H0YLG1;H0YLD2	A0A087X1Z3;Q9UL46;H0YM70;tr|A0A1U7REP6|A0A1U7REP6_MESAU	Proteasome activator complex subunit 2	PSME2
6293800	4381100	5092600	546420	3797600	5923600	1556000	3540500				Homo sapiens	antigen processing and presentation;antigen processing and presentation of exogenous antigen;antigen processing and presentation of exogenous peptide antigen;antigen processing and presentation of exogenous peptide antigen via MHC class II;antigen processing and presentation of peptide antigen;antigen processing and presentation of peptide antigen via MHC class II;antigen processing and presentat…	binding;clathrin binding;peptide binding;protein binding;protein transporter activity;signal sequence binding;substrate-specific transporter activity;transporter activity	AP-2 adaptor complex;AP-type membrane coat adaptor complex;cell part;clathrin adaptor complex;clathrin coated vesicle membrane;clathrin-coated endocytic vesicle membrane;coated vesicle membrane;cytoplasmic part;cytoplasmic vesicle membrane;cytoplasmic vesicle part;cytosol;endocytic vesicle membrane;intracellular membrane-bounded organelle;intracellular organelle;intracellular organelle part;intra…	16	7	7	21.8	10.7	10.7	101.33	0	15.935	4736000000	48	A0A087X253;tr|A0A1U7QQA6|A0A1U7QQA6_MESAU;tr|A0A1U8C2U8|A0A1U8C2U8_MESAU;P63010;P63010-2;P63010-3;A0A087WYD1;A0A087WU93;A0A087WZQ6;K7EJX1;K7EN71;K7ERB2;A0A087WXS3;K7EKZ5;K7EJ01;H7C034	A0A087X253;tr|A0A1U7QQA6|A0A1U7QQA6_MESAU;tr|A0A1U8C2U8|A0A1U8C2U8_MESAU;P63010;P63010-2;P63010-3;A0A087WYD1;A0A087WU93;A0A087WZQ6	AP-2 complex subunit beta	AP2B1
52445000	21846000	16701000	21837000	7723300	18712000	11392000	3091900				Homo sapiens	apoptotic mitochondrial changes;biological regulation;cell surface receptor linked signaling pathway;cellular component organization;cellular component organization at cellular level;cellular component organization or biogenesis;cellular component organization or biogenesis at cellular level;cellular process;cellular response to chemical stimulus;cellular response to cytokine stimulus;cellular re…		cell part;cytoplasm;cytoplasmic part;cytosol;endoplasmic reticulum;intracellular membrane-bounded organelle;intracellular organelle;intracellular part;membrane-bounded organelle;organelle	12	12	12	24	24	24	55.984	0	323.31	5588400000	30	A0A087X279;P09913	A0A087X279;P09913	Interferon-induced protein with tetratricopeptide repeats 2	IFIT2
1202900	0	0	0	0	558290	0	0				Homo sapiens	biological regulation;cell cycle arrest;cell cycle process;cellular process;negative regulation of autophagy;negative regulation of biological process;negative regulation of catabolic process;negative regulation of cell cycle;negative regulation of cell proliferation;negative regulation of cellular catabolic process;negative regulation of cellular metabolic process;negative regulation of cellular…		cell part;cytoplasm;intracellular part;macromolecular complex;membrane;plasma membrane;protein complex	2	2	2	5	5	5	116.17	0	8.9201	98343000	3	E9PDU5;A0A087X295;Q9NNW5	E9PDU5;A0A087X295;Q9NNW5	WD repeat-containing protein 6	WDR6
17266000	11846000	14411000	1844300	20555000	8257500	2091700	17046000				Homo sapiens	biosynthetic process;cellular biosynthetic process;cellular macromolecule biosynthetic process;cellular macromolecule metabolic process;cellular metabolic process;cellular nitrogen compound metabolic process;cellular process;establishment of localization;establishment of localization in cell;establishment of RNA localization;gene expression;intracellular transport;macromolecule biosynthetic proce…	binding;nucleic acid binding;nucleotide binding;RNA binding	cell part;cytoplasm;intracellular organelle part;intracellular part;nuclear part;nucleoplasm;organelle part	3	2	2	31.6	31.6	31.6	10.32	0.00067385	4.0098	1667600000	24	A0A087X2D0;tr|A0A1U7QS82|A0A1U7QS82_MESAU;P84103-2;P84103	A0A087X2D0;tr|A0A1U7QS82|A0A1U7QS82_MESAU;P84103-2;P84103	Serine/arginine-rich splicing factor 3	SRSF3
71055000	37379000	46320000	30028000	56223000	78937000	40376000	35355000				Homo sapiens	activation of JUN kinase activity;activation of MAPK activity;biological regulation;cell differentiation;cellular component assembly;cellular component organization;cellular component organization or biogenesis;cellular developmental process;cellular macromolecule metabolic process;cellular metabolic process;cellular process;cellular protein metabolic process;developmental process;endosome transp…	binding;binding, bridging;cytoskeletal protein binding;enzyme binding;JUN kinase binding;kinase binding;kinesin binding;MAP-kinase scaffold activity;protein binding;protein complex scaffold;protein kinase binding;receptor signaling complex scaffold activity;signaling adaptor activity;structural molecule activity	acrosomal vesicle;cell part;cytoplasm;cytoplasmic membrane-bounded vesicle;cytoplasmic part;cytoplasmic vesicle;cytosol;extracellular membrane-bounded organelle;extracellular organelle;extracellular region part;extracellular vesicular exosome;integral to membrane;intracellular membrane-bounded organelle;intracellular organelle;intracellular part;intrinsic to membrane;membrane part;membrane-bounde…	37	37	1	39.4	39.4	1.4	145.17	0	323.31	27804000000	221	A0A087X2D8;O60271-4;O60271-2;O60271-5;O60271-9;tr|A0A1U8C0S6|A0A1U8C0S6_MESAU;tr|A0A1U7QXZ8|A0A1U7QXZ8_MESAU;H0YBE9;tr|A0A1U8CCC1|A0A1U8CCC1_MESAU;E9PFH7;A0A087WYG2;Q9UPT6;Q9UPT6-2;H0YBS5;H0Y981	A0A087X2D8;O60271-4;O60271-2;O60271-5;O60271-9;tr|A0A1U8C0S6|A0A1U8C0S6_MESAU	C-Jun-amino-terminal kinase-interacting protein 4	SPAG9
2486300	968610	906010	63400	526980	2520800	1049100	750850				Homo sapiens	anatomical structure formation involved in morphogenesis;cellular macromolecule metabolic process;cellular metabolic process;cellular process;cellular protein metabolic process;developmental process;macromolecule metabolic process;macromolecule modification;metabolic process;neural tube closure;primary metabolic process;protein metabolic process;protein modification by small protein conjugation;p…	acid-amino acid ligase activity;binding;catalytic activity;cation binding;ion binding;ligase activity;ligase activity, forming carbon-nitrogen bonds;metal ion binding;small conjugating protein ligase activity;ubiquitin-protein ligase activity	cell part;cytoplasm;intracellular membrane-bounded organelle;intracellular organelle;intracellular part;membrane-bounded organelle;nucleus;organelle	12	12	11	6.4	6.4	6.2	289.63	0	65.403	3324500000	32	A0A087X2H1;Q9ULT8;H0YJP0;tr|A0A1U8C1I4|A0A1U8C1I4_MESAU;H0YJD4;G3V4V5;A0A087WVU6	A0A087X2H1;Q9ULT8;H0YJP0;tr|A0A1U8C1I4|A0A1U8C1I4_MESAU	E3 ubiquitin-protein ligase HECTD1	HECTD1
86795000	67482000	129000000	27491000	111580000	171150000	32034000	64391000				Homo sapiens	activation of immune response;activation of innate immune response;anaphase-promoting complex-dependent proteasomal ubiquitin-dependent protein catabolic process;antigen processing and presentation;antigen processing and presentation of exogenous antigen;antigen processing and presentation of exogenous peptide antigen;antigen processing and presentation of exogenous peptide antigen via MHC class …	adenyl nucleotide binding;adenyl ribonucleotide binding;ATP binding;ATPase activity;binding;binding, bridging;catalytic activity;hydrolase activity;hydrolase activity, acting on acid anhydrides;hydrolase activity, acting on acid anhydrides, in phosphorus-containing anhydrides;nucleoside-triphosphatase activity;nucleotide binding;protein binding;protein binding, bridging;purine nucleotide binding;…	cell part;cytoplasmic part;cytosol;cytosolic part;cytosolic proteasome complex;extracellular membrane-bounded organelle;extracellular organelle;extracellular region part;extracellular vesicular exosome;inclusion body;intracellular membrane-bounded organelle;intracellular organelle;intracellular organelle part;intracellular part;macromolecular complex;membrane;membrane-bounded organelle;membrane-b…	16	16	16	53.3	53.3	53.3	45.796	0	323.31	22610000000	238	tr|A0A1U7R4M1|A0A1U7R4M1_MESAU;A0A087X2I1;P62333;H0YJC0;H0YJS8;H0YJX2;H0YJE9;H0YJT1	tr|A0A1U7R4M1|A0A1U7R4M1_MESAU;A0A087X2I1;P62333;H0YJC0	26S protease regulatory subunit 10B	PSMC6
0	0	0	0	0	0	0	0				Homo sapiens	apoptosis;cell death;cellular process;death;programmed cell death	binding;catalytic activity;cation binding;hydrolase activity;hydrolase activity, acting on acid anhydrides;hydrolase activity, acting on acid anhydrides, in phosphorus-containing anhydrides;ion binding;metal ion binding;pyrophosphatase activity	cell part;cytoplasm;intracellular part	2	2	2	0.8	0.8	0.8	337.6	0	9.6744	306890000	3	A0A088AWP5;Q8WUY3-4;Q8WUY3;Q8WUY3-2;Q8WUY3-3;A0A0C4DFM3;Q5JUB9;tr|A0A1U8BR87|A0A1U8BR87_MESAU;X6R9J3;Q5JUB8;H7BZH9;E9PDC2;Q8WUY3-5	A0A088AWP5;Q8WUY3-4;Q8WUY3;Q8WUY3-2;Q8WUY3-3;A0A0C4DFM3;Q5JUB9;tr|A0A1U8BR87|A0A1U8BR87_MESAU;X6R9J3;Q5JUB8;H7BZH9;E9PDC2;Q8WUY3-5	Protein prune homolog 2	PRUNE2
2219900	8518900	17560000	2653400	23099000	12611000	6328300	13838000				Homo sapiens			cell part;cytoplasmic part;intracellular membrane-bounded organelle;intracellular organelle;intracellular part;membrane-bounded organelle;mitochondrion;organelle	4	4	4	33	33	33	19.416	0	54.469	1126700000	14	A0A096LNH5;H7C2G3;A0A0B4J2D5;A0A096LPI6;P30042;A0A0B4J2H4;H7C1F6;P30042-2;A0A096LP73;F2Z2Q0;A0A096LP12;A0A096LNJ1	A0A096LNH5;H7C2G3;A0A0B4J2D5;A0A096LPI6;P30042;A0A0B4J2H4;H7C1F6;P30042-2;A0A096LP73;F2Z2Q0;A0A096LP12	ES1 protein homolog, mitochondrial	C21orf33
956220032	323720000	489300000	296409984	293600000	540529984	362910016	148050000				Homo sapiens	biological regulation;biosynthetic process;catabolic process;cell surface receptor linked signaling pathway;cellular biosynthetic process;cellular catabolic process;cellular macromolecule biosynthetic process;cellular macromolecule catabolic process;cellular macromolecule metabolic process;cellular metabolic process;cellular nitrogen compound metabolic process;cellular process;cellular protein me…	protein tag	cell part;cytoplasmic part;cytosol;extracellular region;intracellular organelle part;intracellular part;nuclear part;nucleoplasm;organelle part	6	6	6	57.3	57.3	57.3	15.562	0	290.25	37917000000	137	A0A096LNZ9;A0A096LPJ4;P05161	A0A096LNZ9;A0A096LPJ4;P05161	Ubiquitin-like protein ISG15	ISG15
0	0	0	0	1165400	3576200	938120	0				Homo sapiens				2	2	2	9.2	9.2	9.2	37.531	0	9.0363	280880000	2	A0A0A0MQR2;Q9BY42;A2A2L5	A0A0A0MQR2;Q9BY42;A2A2L5	Protein RTF2 homolog	RTFDC1
2478700	996020	810350	910090	1234900	1849400	1963900	1289400				Homo sapiens		adenyl nucleotide binding;adenyl ribonucleotide binding;ATP binding;binding;catalytic activity;kinase activity;nucleotide binding;phosphotransferase activity, alcohol group as acceptor;protein kinase activity;protein serine/threonine kinase activity;purine nucleotide binding;purine ribonucleoside triphosphate binding;purine ribonucleotide binding;ribonucleotide binding;transferase activity;transf…	cell part;extracellular membrane-bounded organelle;extracellular organelle;extracellular region part;extracellular vesicular exosome;membrane;membrane-bounded organelle;membrane-bounded vesicle;organelle;plasma membrane;vesicle	7	4	4	11.2	7	7	79.875	0	12.303	722910000	6	A0A0A0MQR8;A0A0A0MSZ1;A0A0A0MT23;J3KNR0;P27448-6;P27448-3;P27448-4;P27448-2;P27448;P27448-7;A0A0A0MST9;P27448-8;H0YIY6;H0YNV4;tr|A0A1U7QN29|A0A1U7QN29_MESAU;A2SY06;B4DIB3;A0A087X0I6;Q9P0L2;H0YKP9;Q9P0L2-3	A0A0A0MQR8;A0A0A0MSZ1;A0A0A0MT23;J3KNR0;P27448-6;P27448-3;P27448-4;P27448-2;P27448;P27448-7;A0A0A0MST9;P27448-8;H0YIY6	MAP/microtubule affinity-regulating kinase 3	MARK3
40418000	1322000	8797900	6624500	9161400	27223000	20554000	4349800				Homo sapiens	amine biosynthetic process;amine metabolic process;biosynthetic process;carboxylic acid biosynthetic process;carboxylic acid metabolic process;cellular amine metabolic process;cellular amino acid biosynthetic process;cellular amino acid metabolic process;cellular biosynthetic process;cellular ketone metabolic process;cellular metabolic process;cellular nitrogen compound biosynthetic process;cellu…	catalytic activity;oxidoreductase activity;oxidoreductase activity, acting on the CH-NH group of donors;oxidoreductase activity, acting on the CH-NH group of donors, NAD or NADP as acceptor;pyrroline-5-carboxylate reductase activity		6	6	6	23.4	23.4	23.4	29.892	0	47.184	2040100000	22	A0A0A0MQS1;Q53H96-2;Q53H96;B5MD87;F8WEI0;tr|A0A1U7R2B9|A0A1U7R2B9_MESAU	A0A0A0MQS1;Q53H96-2;Q53H96;B5MD87	Pyrroline-5-carboxylate reductase;Pyrroline-5-carboxylate reductase 3	PYCRL
0	0	0	0	0	0	0	0				Homo sapiens	biological regulation;negative regulation of catalytic activity;negative regulation of endopeptidase activity;negative regulation of hydrolase activity;negative regulation of molecular function;negative regulation of peptidase activity;regulation of biological process;regulation of catalytic activity;regulation of endopeptidase activity;regulation of hydrolase activity;regulation of macromolecule…	binding;cysteine-type endopeptidase inhibitor activity;endopeptidase inhibitor activity;endopeptidase regulator activity;enzyme binding;enzyme inhibitor activity;enzyme regulator activity;peptidase inhibitor activity;peptidase regulator activity;protease binding;protein binding;serine-type endopeptidase inhibitor activity	cell part;cytoplasm;extracellular membrane-bounded organelle;extracellular organelle;extracellular region part;extracellular space;extracellular vesicular exosome;intracellular organelle part;intracellular part;membrane-bounded organelle;membrane-bounded vesicle;nuclear part;nucleoplasm;organelle;organelle part;vesicle	2	2	2	18.8	18.8	18.8	18.885	0.0021381	2.8475	74664000	2	F8WE70;A0A0A0MQW3;Q9UIV8-2;Q9UIV8;C9JL93;tr|A0A1U8CC27|A0A1U8CC27_MESAU;tr|A0A1U7R5K0|A0A1U7R5K0_MESAU	F8WE70;A0A0A0MQW3;Q9UIV8-2;Q9UIV8;C9JL93;tr|A0A1U8CC27|A0A1U8CC27_MESAU;tr|A0A1U7R5K0|A0A1U7R5K0_MESAU	Serpin B13	SERPINB13
63073000	7605300	8180400	50800000	70555000	69745000	112170000	114950000				Homo sapiens	alternative nuclear mRNA splicing, via spliceosome;anatomical structure development;anatomical structure morphogenesis;appendage morphogenesis;biological regulation;cell differentiation;cellular component assembly;cellular component assembly at cellular level;cellular component organization;cellular component organization at cellular level;cellular component organization or biogenesis;cellular co…	binding;cation binding;double-stranded RNA binding;ion binding;metal ion binding;nucleic acid binding;RNA binding	cell part;centrosome;cytoplasm;cytoplasmic part;cytoskeletal part;intracellular membrane-bounded organelle;intracellular non-membrane-bounded organelle;intracellular organelle;intracellular organelle part;intracellular part;macromolecular complex;membrane-bounded organelle;microtubule organizing center;non-membrane-bounded organelle;nuclear part;nucleoplasm;nucleus;organelle;organelle part;ribonu…	3	3	3	5.7	5.7	5.7	37.898	0.0021309	2.8256	28913000000	10	C9JP00;A0A0A0MQX8;Q9NR56-3;Q9NR56-4;Q9NR56-7;Q9NR56-6;Q9NR56-2;Q9NR56-5;Q9NR56;C9JCX1;H7C4Y1;O95205;tr|A0A1U8C7R8|A0A1U8C7R8_MESAU;tr|A0A1U8C7X4|A0A1U8C7X4_MESAU;tr|A0A1U8CAV1|A0A1U8CAV1_MESAU;tr|A0A1U8CIR2|A0A1U8CIR2_MESAU;H7C4T5;tr|A0A1U8CIQ5|A0A1U8CIQ5_MESAU;tr|A0A1U8CF59|A0A1U8CF59_MESAU;tr|A0A1U8C7X7|A0A1U8C7X7_MESAU;tr|A0A1U8CAU7|A0A1U8CAU7_MESAU;tr|A0A1U8C4S5|A0A1U8C4S5_MESAU;tr|A0A1U8CIQ7…	C9JP00;A0A0A0MQX8;Q9NR56-3;Q9NR56-4;Q9NR56-7;Q9NR56-6;Q9NR56-2;Q9NR56-5;Q9NR56	Muscleblind-like protein 1	MBNL1
18995000	6379800	7624300	3549600	2909600	6767300	5834800	2335400				Homo sapiens	biological regulation;blood coagulation;cell activation;cell chemotaxis;cell migration;cell motility;cell surface receptor linked signaling pathway;cellular component movement;cellular metabolic process;cellular process;cellular response to chemical stimulus;cellular response to fibroblast growth factor stimulus;cellular response to growth factor stimulus;cellular response to organic substance;ce…	binding;cation binding;enzyme regulator activity;GTPase regulator activity;guanyl-nucleotide exchange factor activity;ion binding;metal ion binding;nucleic acid binding transcription factor activity;nucleoside-triphosphatase regulator activity;Rac guanyl-nucleotide exchange factor activity;Ras guanyl-nucleotide exchange factor activity;Rho guanyl-nucleotide exchange factor activity;sequence-speci…	cell junction;cell part;cell-cell junction;cytoplasmic part;cytosol;intracellular part;membrane;plasma membrane	12	11	11	18.3	17	17	91.729	0	112.19	2295100000	32	F5H5P4;Q96D37;A0A0A0MR07;P15498;P15498-2;tr|A0A1U7QLC5|A0A1U7QLC5_MESAU	F5H5P4;Q96D37;A0A0A0MR07;P15498;P15498-2	Proto-oncogene vav	VAV1
5287700	5960400	5819400	1519900	7082000	6682700	3593500	5036400				Homo sapiens	amine catabolic process;amine metabolic process;aromatic amino acid family catabolic process;aromatic amino acid family metabolic process;aromatic compound catabolic process;carboxylic acid catabolic process;carboxylic acid metabolic process;catabolic process;cellular amine metabolic process;cellular amino acid catabolic process;cellular amino acid metabolic process;cellular aromatic compound met…	antioxidant activity;binding;catalytic activity;cis-trans isomerase activity;glutathione peroxidase activity;glutathione transferase activity;identical protein binding;isomerase activity;maleylacetoacetate isomerase activity;oxidoreductase activity;oxidoreductase activity, acting on peroxide as acceptor;peroxidase activity;protein binding;protein dimerization activity;protein homodimerization act…	cell part;cytoplasm;cytoplasmic part;cytosol;intracellular membrane-bounded organelle;intracellular organelle;intracellular part;membrane-bounded organelle;mitochondrion;organelle	3	3	3	20.1	20.1	20.1	19.373	0.00034746	4.4038	1893300000	8	A0A0A0MR33;G3V267;G3V5T0;A0A0C4DFM0;G3V4T6;O43708-3;O43708;G3V3B9;O43708-2	A0A0A0MR33;G3V267;G3V5T0;A0A0C4DFM0;G3V4T6;O43708-3;O43708	Maleylacetoacetate isomerase	GSTZ1
20265000	29899000	28244000	2429100	39362000	45858000	1941100	31522000				Homo sapiens	biological regulation;biosynthetic process;cellular biosynthetic process;cellular macromolecule biosynthetic process;cellular macromolecule metabolic process;cellular metabolic process;cellular nitrogen compound metabolic process;cellular process;gene expression;macromolecule biosynthetic process;macromolecule metabolic process;metabolic process;mRNA metabolic process;mRNA processing;multi-organi…	binding;enzyme binding;nucleic acid binding;protein binding;RNA binding	cell part;intracellular membrane-bounded organelle;intracellular organelle;intracellular organelle part;intracellular part;macromolecular complex;membrane-bounded organelle;nuclear part;nucleoplasm;nucleus;organelle;organelle part;ribonucleoprotein complex;viral nucleocapsid;virion part	12	12	12	20.4	20.4	20.4	85.939	0	78.747	9826400000	44	A0A0A0MRA5;B7Z4B8;Q9BUJ2-4;Q9BUJ2-2;Q9BUJ2;Q9BUJ2-3;M0R3F1;tr|A0A1U8CNN7|A0A1U8CNN7_MESAU;tr|A0A1U8CNE5|A0A1U8CNE5_MESAU;tr|A0A1U8CR89|A0A1U8CR89_MESAU;M0QYZ0;M0R203;M0QZV6;M0R0K8;M0QYI8;M0QYM5	A0A0A0MRA5;B7Z4B8;Q9BUJ2-4;Q9BUJ2-2;Q9BUJ2;Q9BUJ2-3;M0R3F1;tr|A0A1U8CNN7|A0A1U8CNN7_MESAU;tr|A0A1U8CNE5|A0A1U8CNE5_MESAU;tr|A0A1U8CR89|A0A1U8CR89_MESAU;M0QYZ0	Heterogeneous nuclear ribonucleoprotein U-like protein 1	HNRNPUL1
0	0	0	0	0	0	0	0				Homo sapiens	cellular component organization;cellular component organization at cellular level;cellular component organization or biogenesis;cellular component organization or biogenesis at cellular level;cellular macromolecule metabolic process;cellular metabolic process;cellular process;cellular protein metabolic process;establishment of localization;establishment of localization in cell;establishment of pr…		cell cortex part;cell part;cell projection part;centriolar satellite;cytoplasmic part;cytoskeletal part;cytosol;exocyst;growth cone membrane;intracellular organelle part;intracellular part;macromolecular complex;membrane;membrane part;microtubule organizing center;microtubule organizing center part;organelle part;plasma membrane;plasma membrane part;protein complex	2	2	2	3.9	3.9	3.9	70.2	0	5.1446	85978000	3	A0A0A0MRE1;tr|A0A1U7QDA6|A0A1U7QDA6_MESAU;B4DJ07;tr|A0A1U8BZS6|A0A1U8BZS6_MESAU;tr|A0A1U7QNQ0|A0A1U7QNQ0_MESAU;A0A0A0MSB8;tr|A0A1U7QL78|A0A1U7QL78_MESAU;Q9UPT5-2;Q9UPT5-5;Q9UPT5-1;Q9UPT5-6;Q9UPT5	A0A0A0MRE1;tr|A0A1U7QDA6|A0A1U7QDA6_MESAU;B4DJ07;tr|A0A1U8BZS6|A0A1U8BZS6_MESAU;tr|A0A1U7QNQ0|A0A1U7QNQ0_MESAU;A0A0A0MSB8;tr|A0A1U7QL78|A0A1U7QL78_MESAU;Q9UPT5-2;Q9UPT5-5;Q9UPT5-1;Q9UPT5-6;Q9UPT5	Exocyst complex component 7	EXOC7
3110300	2042900	2373700	1434800	2518300	4708700	2942400	1501400				Homo sapiens	anatomical structure morphogenesis;cell part morphogenesis;cell projection morphogenesis;cell projection organization;cellular component morphogenesis;cellular component organization;cellular component organization at cellular level;cellular component organization or biogenesis;cellular component organization or biogenesis at cellular level;cellular developmental process;cellular process;cilium m…	binding;cation binding;enzyme activator activity;enzyme regulator activity;GTPase activator activity;GTPase regulator activity;ion binding;lipid binding;metal ion binding;nucleoside-triphosphatase regulator activity;phosphatidylinositol binding;phosphatidylinositol-3,4,5-trisphosphate binding;phosphatidylinositol-4,5-bisphosphate binding;phospholipid binding;transition metal ion binding;zinc ion …	cell part;cytoplasmic part;cytosol;intracellular part;membrane	10	10	10	11.1	11.1	11.1	124.77	0	16.842	1402800000	24	A0A0A0MRE5;Q9ULH1;Q9ULH1-2;H0YBF7;tr|A0A1U8C973|A0A1U8C973_MESAU;H0YBM4;E5RHD7;tr|A0A1U8CNT5|A0A1U8CNT5_MESAU;O43150-2;O43150	A0A0A0MRE5;Q9ULH1;Q9ULH1-2;H0YBF7;tr|A0A1U8C973|A0A1U8C973_MESAU	Arf-GAP with SH3 domain, ANK repeat and PH domain-containing protein 1	ASAP1
2979200	2101800	1282200	400830	2268100	1663300	3189900	1342200				Homo sapiens	developmental process;multicellular organismal development;multicellular organismal process		cell part;cytoplasm;cytoskeletal part;intracellular organelle part;intracellular part;macromolecular complex;microtubule;organelle part;protein complex	5	5	5	7.3	7.3	7.3	98.701	0	12.185	729870000	12	A0A0A0MRE6;O94967-2;O94967;O94967-3;O94967-4;tr|A0A1U8C592|A0A1U8C592_MESAU;tr|A0A1U8CDB9|A0A1U8CDB9_MESAU;tr|A0A1U8CCP9|A0A1U8CCP9_MESAU;tr|A0A1U8C298|A0A1U8C298_MESAU;E9PKZ6;E9PR96	A0A0A0MRE6;O94967-2;O94967;O94967-3;O94967-4	WD repeat-containing protein 47	WDR47
7671700	1448100	0	1226100	0	6022400	1418800	1186800				Homo sapiens				3	3	2	10.9	10.9	7.4	37.971	0.00035575	4.8502	529950000	6	A0A0A0MRI1;Q8IXQ4;Q8IXQ4-2;Q8IXQ4-3	A0A0A0MRI1;Q8IXQ4;Q8IXQ4-2	GPALPP motifs-containing protein 1	GPALPP1
31268000	24496000	20447000	12138000	50512000	45491000	25693000	13776000				Homo sapiens	biological regulation;cellular component organization;cellular component organization at cellular level;cellular component organization or biogenesis;cellular component organization or biogenesis at cellular level;cellular membrane organization;cellular process;endocytosis;endosome transport;establishment of localization;establishment of localization in cell;establishment of protein localization;…	binding;cytoskeletal protein binding;dynactin binding;identical protein binding;lipid binding;phosphatidylinositol binding;phospholipid binding;protein binding;protein dimerization activity;protein homodimerization activity	cell part;cytoplasm;cytoplasmic membrane-bounded vesicle;cytoplasmic part;cytoplasmic vesicle;early endosome membrane;endosomal part;endosome membrane;extrinsic to membrane;intracellular;intracellular membrane-bounded organelle;intracellular organelle;intracellular organelle part;intracellular part;macromolecular complex;membrane;membrane part;membrane-bounded organelle;membrane-bounded vesicle;n…	9	9	8	21.1	21.1	17.7	47.804	0	30.493	5966100000	43	A0A0A0MRI2;Q9UNH7;Q9UNH7-2;G3V5X9;tr|A0A1U8CA31|A0A1U8CA31_MESAU;G3V5U2;H0YJF8;G3V4Z5;Q86XE0-2	A0A0A0MRI2;Q9UNH7;Q9UNH7-2;G3V5X9	Sorting nexin-6;Sorting nexin-6, N-terminally processed	SNX6
208280000	172470000	191700000	52790000	242140000	301030016	163350000	92574000				Homo sapiens	amine metabolic process;carboxylic acid metabolic process;cellular amine metabolic process;cellular amino acid metabolic process;cellular ketone metabolic process;cellular macromolecule metabolic process;cellular metabolic process;cellular modified amino acid metabolic process;cellular nitrogen compound metabolic process;cellular process;cellular protein metabolic process;coenzyme metabolic proce…	carboxyl-O-methyltransferase activity;catalytic activity;methyltransferase activity;O-methyltransferase activity;protein carboxyl O-methyltransferase activity;protein methyltransferase activity;protein-L-isoaspartate (D-aspartate) O-methyltransferase activity;S-adenosylmethionine-dependent methyltransferase activity;transferase activity;transferase activity, transferring one-carbon groups	cell part;cytoplasm;cytoplasmic part;endoplasmic reticulum;extracellular membrane-bounded organelle;extracellular organelle;extracellular region part;extracellular vesicular exosome;intracellular membrane-bounded organelle;intracellular organelle;intracellular part;membrane-bounded organelle;membrane-bounded vesicle;organelle;vesicle	12	12	12	52.3	52.3	52.3	30.315	0	323.31	22848000000	122	A0A0A0MRJ6;H7BY58;P22061;P22061-2;F6S8N6;tr|A0A1U7Q3J9|A0A1U7Q3J9_MESAU;F8WDT3;F8WAV5;F8WAX2;C9J0F2;H7C4X2	A0A0A0MRJ6;H7BY58;P22061;P22061-2;F6S8N6;tr|A0A1U7Q3J9|A0A1U7Q3J9_MESAU	Protein-L-isoaspartate O-methyltransferase;Protein-L-isoaspartate(D-aspartate) O-methyltransferase	PCMT1
986350	0	0	908060	0	0	2041600	0				Homo sapiens	activation of caspase activity;activation of caspase activity by cytochrome c;aging;anatomical structure development;apoptosis;apoptotic mitochondrial changes;biological regulation;cell death;cellular component disassembly;cellular component disassembly at cellular level;cellular component disassembly involved in apoptosis;cellular component organization;cellular component organization at cellula…	aspartic-type endopeptidase activity;aspartic-type peptidase activity;catalytic activity;cysteine-type endopeptidase activity;cysteine-type endopeptidase activity involved in apoptotic process;cysteine-type peptidase activity;endopeptidase activity;hydrolase activity;peptidase activity;peptidase activity, acting on L-amino acid peptides	cell part;cytoplasm;cytoplasmic part;cytosol;intracellular membrane-bounded organelle;intracellular organelle;intracellular organelle part;intracellular part;membrane-bounded organelle;nuclear part;nucleoplasm;nucleus;organelle;organelle part	2	2	2	5.4	5.4	5.4	43.728	0.0057438	2.323	219130000	2	A0A0A0MRL7;P55210-4;P55210;P55210-3;Q5SVL2;tr|A0A1U7Q2E9|A0A1U7Q2E9_MESAU;sp|P55214|CASP7_MESAU	A0A0A0MRL7;P55210-4;P55210;P55210-3;Q5SVL2;tr|A0A1U7Q2E9|A0A1U7Q2E9_MESAU;sp|P55214|CASP7_MESAU	Caspase-7;Caspase-7 subunit p20;Caspase-7 subunit p11	CASP7
14369000	4194100	5355900	4540500	3156400	7776900	8484700	2436400				Homo sapiens	actin filament-based movement;actin filament-based process;anatomical structure development;anatomical structure morphogenesis;auditory receptor cell differentiation;behavior;biological regulation;cell communication;cell differentiation;cell projection organization;cell-cell signaling;cellular component assembly;cellular component assembly at cellular level;cellular component movement;cellular co…	actin binding;actin filament binding;adenyl nucleotide binding;adenyl ribonucleotide binding;ADP binding;ATP binding;binding;calmodulin binding;catalytic activity;cytoskeletal protein binding;hydrolase activity;hydrolase activity, acting on acid anhydrides;hydrolase activity, acting on acid anhydrides, in phosphorus-containing anhydrides;microfilament motor activity;minus-end directed microfilame…	apical part of cell;axon;cell body;cell cortex;cell part;cell projection;cell projection membrane;cell projection part;clathrin coated vesicle membrane;coated pit;coated vesicle membrane;cytoplasm;cytoplasmic membrane-bounded vesicle;cytoplasmic part;cytoplasmic vesicle;cytoplasmic vesicle membrane;cytoplasmic vesicle part;cytoskeletal part;cytosol;DNA-directed RNA polymerase II, holoenzyme;endoc…	19	19	7	18	18	7	145.01	0	94.466	3827700000	60	A0A0A0MRM8;Q9UM54-6;A0A0D9SGC1;E7EW20;Q9UM54-5;Q9UM54-2;Q9UM54-4;Q9UM54-1;Q9UM54	A0A0A0MRM8;Q9UM54-6;A0A0D9SGC1;E7EW20;Q9UM54-5;Q9UM54-2;Q9UM54-4;Q9UM54-1;Q9UM54	Unconventional myosin-VI	MYO6
1042900	3232600	1599900	324330	3571200	2998200	0	2967600				Homo sapiens	cell cycle;cell cycle phase;cell cycle process;cellular component organization;cellular component organization at cellular level;cellular component organization or biogenesis;cellular component organization or biogenesis at cellular level;cellular macromolecule metabolic process;cellular metabolic process;cellular nitrogen compound metabolic process;cellular process;macromolecule metabolic proces…	adenyl nucleotide binding;adenyl ribonucleotide binding;ATP binding;binding;GTP binding;guanyl nucleotide binding;guanyl ribonucleotide binding;nucleotide binding;purine nucleotide binding;purine ribonucleoside triphosphate binding;purine ribonucleotide binding;ribonucleotide binding	Cajal body;cell part;cytoplasm;intracellular non-membrane-bounded organelle;intracellular organelle;intracellular organelle part;intracellular part;non-membrane-bounded organelle;nuclear body;nuclear part;nucleolus;nucleoplasm;nucleoplasm part;organelle;organelle part	4	4	4	7.2	7.2	7.2	74.543	0.00035907	5.0115	716950000	7	A0A0A0MRM9;Q14978;Q14978-3;Q14978-2;S4R402;S4R341;S4R349;tr|A0A1U8D523|A0A1U8D523_MESAU	A0A0A0MRM9;Q14978;Q14978-3;Q14978-2	Nucleolar and coiled-body phosphoprotein 1	NOLC1
0	475900	796110	0	860120	685380	0	1449300				Homo sapiens	biological regulation;biosynthetic process;cellular biosynthetic process;cellular macromolecule biosynthetic process;cellular macromolecule metabolic process;cellular metabolic process;cellular nitrogen compound metabolic process;cellular process;macromolecule biosynthetic process;macromolecule metabolic process;metabolic process;mRNA metabolic process;mRNA processing;nitrogen compound metabolic …	basal RNA polymerase II transcription machinery binding;basal transcription machinery binding;binding;cation binding;DNA binding;enzyme binding;ion binding;metal ion binding;nucleic acid binding;protein binding;RNA polymerase binding;RNA polymerase core enzyme binding;RNA polymerase II core binding;transition metal ion binding;zinc ion binding	cell part;intracellular membrane-bounded organelle;intracellular organelle;intracellular organelle part;intracellular part;membrane-bounded organelle;nuclear matrix;nuclear part;nucleoplasm;nucleus;organelle;organelle part	1	1	1	3.2	3.2	3.2	55.57	0.0089286	2.1118	93870000	2	A0A0A0MRN4;tr|A0A1U8C3J4|A0A1U8C3J4_MESAU;Q5BKZ1-3;Q5BKZ1	A0A0A0MRN4;tr|A0A1U8C3J4|A0A1U8C3J4_MESAU;Q5BKZ1-3;Q5BKZ1	DBIRD complex subunit ZNF326	ZNF326
10710000	5547100	7178400	8872400	11033000	12046000	12055000	10342000				Homo sapiens	2-oxoglutarate metabolic process;amine catabolic process;amine metabolic process;aromatic amino acid family catabolic process;aromatic amino acid family metabolic process;aromatic compound catabolic process;biosynthetic process;carboxylic acid catabolic process;carboxylic acid metabolic process;catabolic process;cellular amine metabolic process;cellular amino acid catabolic process;cellular amino…	binding;carbon-sulfur lyase activity;catalytic activity;cofactor binding;cysteine-S-conjugate beta-lyase activity;kynurenine-glyoxylate transaminase activity;kynurenine-oxoglutarate transaminase activity;lyase activity;pyridoxal phosphate binding;transaminase activity;transferase activity;transferase activity, transferring nitrogenous groups;vitamin B6 binding;vitamin binding	cell part;cytoplasmic part;intracellular membrane-bounded organelle;intracellular organelle;intracellular part;membrane-bounded organelle;mitochondrion;organelle	6	6	6	29.8	29.8	29.8	29.471	0	21.165	1233500000	17	A0A0A0MRN7;Q6YP21-3;Q6YP21;Q6YP21-2;tr|A0A1U7R8T4|A0A1U7R8T4_MESAU	A0A0A0MRN7;Q6YP21-3;Q6YP21;Q6YP21-2	Kynurenine--oxoglutarate transaminase 3	CCBL2
0	0	0	0	0	0	0	2313600				Homo sapiens	cellular component assembly;cellular component assembly at cellular level;cellular component organization;cellular component organization at cellular level;cellular component organization or biogenesis;cellular component organization or biogenesis at cellular level;cellular macromolecular complex assembly;cellular macromolecular complex subunit organization;cellular macromolecule metabolic proces…	binding;cation binding;identical protein binding;ion binding;metal ion binding;mRNA binding;nucleic acid binding;protein binding;protein dimerization activity;protein homodimerization activity;RNA binding;single-stranded RNA binding;snRNA binding;transition metal ion binding;U1 snRNA binding;zinc ion binding	Cajal body;cell part;commitment complex;intracellular organelle part;intracellular part;macromolecular complex;nuclear body;nuclear part;nucleoplasm;nucleoplasm part;organelle part;prespliceosome;ribonucleoprotein complex;small nuclear ribonucleoprotein complex;spliceosomal complex;U1 snRNP;U2-type prespliceosome;U2-type spliceosomal complex	1	1	1	6.7	6.7	6.7	19.687	0.0073488	2.2195	18509000	1	A0A0A0MRR7;P09234	A0A0A0MRR7;P09234	U1 small nuclear ribonucleoprotein C	SNRPC
2354500	2588100	2203600	0	0	5998800	1683900	1952000				Homo sapiens	actin cytoskeleton organization;actin filament organization;actin filament-based process;actin polymerization or depolymerization;anatomical structure development;anatomical structure formation involved in morphogenesis;anatomical structure morphogenesis;anterior/posterior pattern specification;biological regulation;cell development;cell part morphogenesis;cell projection morphogenesis;cell proje…	binding;cytoskeletal protein binding;enzyme activator activity;enzyme regulator activity;kinase activator activity;kinase regulator activity;protein binding;protein complex binding;protein kinase activator activity;protein kinase regulator activity;protein tyrosine kinase activator activity	cell junction;cell part;cell projection;cell projection part;cytoplasm;cytoplasmic part;cytoskeletal part;cytoskeleton;cytosol;endoplasmic reticulum;extracellular membrane-bounded organelle;extracellular organelle;extracellular region part;extracellular vesicular exosome;filopodium;growth cone;intracellular;intracellular membrane-bounded organelle;intracellular non-membrane-bounded organelle;intr…	2	2	2	7	7	7	42.547	0	23.742	1641800000	21	tr|A0A1U7R7P1|A0A1U7R7P1_MESAU;tr|A0A1U7QWX4|A0A1U7QWX4_MESAU;B6VEX4;tr|A0A1U7QNG4|A0A1U7QNG4_MESAU;tr|A0A1U7QZV7|A0A1U7QZV7_MESAU;tr|A0A1U7R9X3|A0A1U7R9X3_MESAU;tr|A0A1U7R7N8|A0A1U7R7N8_MESAU;A0A0A0MRT6;tr|A0A1U7QWW5|A0A1U7QWW5_MESAU;tr|A0A1U7QNF9|A0A1U7QNF9_MESAU;tr|A0A1U7QZV2|A0A1U7QZV2_MESAU;Q8IZP0-10;Q8IZP0-8;Q8IZP0-7;Q8IZP0-2;Q8IZP0-4;Q8IZP0-3;Q8IZP0-5;Q8IZP0-6;Q8IZP0-9;Q8IZP0-12;Q8IZP0;Q8I…	tr|A0A1U7R7P1|A0A1U7R7P1_MESAU;tr|A0A1U7QWX4|A0A1U7QWX4_MESAU;B6VEX4;tr|A0A1U7QNG4|A0A1U7QNG4_MESAU;tr|A0A1U7QZV7|A0A1U7QZV7_MESAU;tr|A0A1U7R9X3|A0A1U7R9X3_MESAU;tr|A0A1U7R7N8|A0A1U7R7N8_MESAU;A0A0A0MRT6;tr|A0A1U7QWW5|A0A1U7QWW5_MESAU;tr|A0A1U7QNF9|A0A1U7QNF9_MESAU;tr|A0A1U7QZV2|A0A1U7QZV2_MESAU;Q8IZP0-10;Q8IZP0-8;Q8IZP0-7;Q8IZP0-2;Q8IZP0-4;Q8IZP0-3;Q8IZP0-5;Q8IZP0-6;Q8IZP0-9;Q8IZP0-12;Q8IZP0;Q8I…	Abl interactor 1	ABI1
167660	3237700	2487700	319050	1599100	2287500	0	6910000				Homo sapiens	biosynthetic process;cell differentiation;cellular biosynthetic process;cellular developmental process;cellular macromolecule biosynthetic process;cellular macromolecule metabolic process;cellular metabolic process;cellular process;cellular protein metabolic process;developmental process;establishment of localization;establishment of protein localization;macromolecule biosynthetic process;macromo…	receptor activity	cell part;cytoplasmic part;endoplasmic reticulum;endoplasmic reticulum part;integral to endoplasmic reticulum membrane;integral to membrane;integral to organelle membrane;intracellular membrane-bounded organelle;intracellular non-membrane-bounded organelle;intracellular organelle;intracellular organelle part;intracellular part;intrinsic to endoplasmic reticulum membrane;intrinsic to membrane;intr…	15	15	15	15.4	15.4	15.4	152.45	0	323.31	2589000000	34	A0A0A0MRV0;Q9P2E9-2;Q9P2E9;A0A087WVV2;Q9P2E9-3;F8W7S5;A0A087WU26;tr|A0A1U8BWV9|A0A1U8BWV9_MESAU;A2A2S5	A0A0A0MRV0;Q9P2E9-2;Q9P2E9;A0A087WVV2;Q9P2E9-3;F8W7S5	Ribosome-binding protein 1	RRBP1
14493000	9358800	18531000	5447600	16249000	21877000	5757900	7196400				Homo sapiens	antigen processing and presentation;antigen processing and presentation of exogenous antigen;antigen processing and presentation of exogenous peptide antigen;antigen processing and presentation of exogenous peptide antigen via MHC class II;antigen processing and presentation of peptide antigen;antigen processing and presentation of peptide antigen via MHC class II;antigen processing and presentat…	structural molecule activity	cell division site part;cell part;centrosome;chromosomal part;cleavage furrow;condensed chromosome kinetochore;cytoplasmic part;cytoskeletal part;cytosol;dynactin complex;intracellular non-membrane-bounded organelle;intracellular organelle;intracellular organelle part;intracellular part;kinetochore;macromolecular complex;microtubule associated complex;microtubule organizing center;midbody;non-mem…	2	2	1	14.1	14.1	7.7	16.091	0.00065381	3.6018	808160000	9	X6RA56;X6RCK5;A0A0A0MRV8;X6RLR1;O75935-3;O75935-2;O75935	X6RA56;X6RCK5;A0A0A0MRV8;X6RLR1;O75935-3;O75935-2;O75935	Dynactin subunit 3	DCTN3
1626500	0	2797000	279330	2433200	4270700	0	707920				Homo sapiens		binding;enzyme activator activity;enzyme regulator activity;GTPase activator activity;GTPase regulator activity;identical protein binding;nucleoside-triphosphatase regulator activity;protein binding;protein dimerization activity;protein homodimerization activity		2	2	2	4.1	4.1	4.1	53.04	0.001888	3.1393	328330000	3	B0QYI1;A0A0A0MRY0;tr|A0A1U7Q9K9|A0A1U7Q9K9_MESAU;Q8WUA7-2;Q8WUA7-4;Q8WUA7;tr|A0A1U8BKY2|A0A1U8BKY2_MESAU;tr|A0A1U8CMQ5|A0A1U8CMQ5_MESAU;tr|A0A1U7RB08|A0A1U7RB08_MESAU;Q8WUA7-3;Q9NU19	B0QYI1;A0A0A0MRY0;tr|A0A1U7Q9K9|A0A1U7Q9K9_MESAU;Q8WUA7-2;Q8WUA7-4;Q8WUA7;tr|A0A1U8BKY2|A0A1U8BKY2_MESAU;tr|A0A1U8CMQ5|A0A1U8CMQ5_MESAU;tr|A0A1U7RB08|A0A1U7RB08_MESAU;Q8WUA7-3;Q9NU19	TBC1 domain family member 22A;TBC1 domain family member 22B	TBC1D22A;TBC1D22B
2880600	2064700	10445000	0	3642400	1223900	6673200	2840800				Homo sapiens	activation of immune response;biological regulation;complement activation;complement activation, classical pathway;defense response;humoral immune response;immune effector process;immune response;immune system process;innate immune response;macromolecule metabolic process;metabolic process;positive regulation of biological process;positive regulation of immune response;positive regulation of immu…	antigen binding;binding	blood microparticle;extracellular membrane-bounded organelle;extracellular organelle;extracellular region;extracellular region part;extracellular space;extracellular vesicular exosome;membrane-bounded organelle;membrane-bounded vesicle;organelle;vesicle	8	8	4	26.8	26.8	16.3	43.911	0	142.51	5006700000	22	A0A0A0MS08;P01857;A0A0A0MS07;P01861	A0A0A0MS08;P01857;A0A0A0MS07	Ig gamma-1 chain C region	IGHG1
0	7694300	9819800	0	4604700	5483600	0	2296200				Homo sapiens	anatomical structure morphogenesis;apoptotic mitochondrial changes;biological regulation;cell part morphogenesis;cellular component assembly;cellular component morphogenesis;cellular component organization;cellular component organization at cellular level;cellular component organization or biogenesis;cellular component organization or biogenesis at cellular level;cellular developmental process;ce…	binding;identical protein binding;protein binding;protein dimerization activity;protein homodimerization activity	cell junction;cell part;clathrin-coated vesicle;coated vesicle;cytoplasmic membrane-bounded vesicle;cytoplasmic part;cytoplasmic vesicle;integral to membrane;integral to mitochondrial membrane;integral to organelle membrane;intracellular membrane-bounded organelle;intracellular organelle;intracellular organelle part;intracellular part;intrinsic to membrane;intrinsic to organelle membrane;membrane…	2	2	2	23.2	23.2	23.2	15.627	0	7.7164	239190000	6	C9JHF5;A0A0A0MS29;Q9GZY8-4;Q9GZY8-5;Q9GZY8-3;Q9GZY8-2;Q9GZY8	C9JHF5;A0A0A0MS29;Q9GZY8-4;Q9GZY8-5;Q9GZY8-3;Q9GZY8-2;Q9GZY8	Mitochondrial fission factor	MFF
2161900	2171100	980640	734300	1173700	1171200	602170	359290				Homo sapiens	cellular component assembly;cellular component assembly at cellular level;cellular component organization;cellular component organization at cellular level;cellular component organization or biogenesis;cellular component organization or biogenesis at cellular level;cellular macromolecular complex assembly;cellular macromolecular complex subunit organization;cellular process;cellular protein compl…		cell part;cytoplasmic part;Golgi apparatus part;Golgi membrane;Golgi transport complex;intracellular organelle part;intracellular part;macromolecular complex;membrane;organelle membrane;organelle part;protein complex	4	4	3	6.5	6.5	5.5	87.183	0	18.934	1363400000	10	A0A0A0MS45;J3KNI1;Q9H9E3;Q9H9E3-2;Q9H9E3-3;J3QLW1;E9PRT5;H3BSD2;H3BMV9	A0A0A0MS45;J3KNI1;Q9H9E3;Q9H9E3-2;Q9H9E3-3	Conserved oligomeric Golgi complex subunit 4	COG4
5720100	3727300	6864300	1640300	3933700	9743400	1632900	792410				Homo sapiens	3'-UTR-mediated mRNA stabilization;activation of immune response;activation of innate immune response;adaptive immune response;adaptive immune response based on somatic recombination of immune receptors built from immunoglobulin superfamily domains;B cell mediated immunity;biological regulation;cell surface receptor linked signaling pathway;cellular macromolecule metabolic process;cellular metabo…	binding;cytokine receptor binding;death receptor binding;identical protein binding;protein binding;protein domain specific binding;receptor binding;TIR domain binding;tumor necrosis factor receptor superfamily binding	cell part;cytoplasm;cytoplasmic part;cytoskeletal part;cytosol;endosomal part;endosome membrane;intracellular organelle part;intracellular part;macromolecular complex;membrane;organelle membrane;organelle part;plasma membrane;postsynaptic density;protein complex;synapse part	4	4	4	18.4	18.4	18.4	34.58	0	6.0504	612980000	9	A0A0A0MS70;H0Y4G9;A0A0A0MST0;Q99836-5;Q99836;Q99836-6;A0A0A0MSI9;Q99836-2;Q99836-3;tr|A0A1U7QWE5|A0A1U7QWE5_MESAU;Q99836-4	A0A0A0MS70;H0Y4G9;A0A0A0MST0;Q99836-5;Q99836;Q99836-6;A0A0A0MSI9;Q99836-2;Q99836-3	Myeloid differentiation primary response protein MyD88	MYD88
4244600	2207200	6965100	437970	3876100	7132700	0	6172200				Homo sapiens	biological regulation;carboxylic acid catabolic process;carboxylic acid metabolic process;catabolic process;cellular catabolic process;cellular ketone metabolic process;cellular lipid catabolic process;cellular lipid metabolic process;cellular metabolic process;cellular process;fatty acid beta-oxidation;fatty acid catabolic process;fatty acid metabolic process;fatty acid oxidation;lipid catabolic…	3-hydroxyacyl-CoA dehydrogenase activity;binding;catalytic activity;coenzyme binding;cofactor binding;NAD binding;NAD+ binding;nucleotide binding;oxidoreductase activity;oxidoreductase activity, acting on CH-OH group of donors;oxidoreductase activity, acting on the CH-OH group of donors, NAD or NADP as acceptor	cell part;cytoplasm;cytoplasmic part;intracellular membrane-bounded organelle;intracellular organelle;intracellular organelle lumen;intracellular organelle part;intracellular part;membrane;membrane-bounded organelle;membrane-enclosed lumen;mitochondrial inner membrane;mitochondrial matrix;mitochondrial membrane;mitochondrial part;mitochondrion;nuclear part;nucleoplasm;organelle;organelle inner me…	2	2	2	10.2	10.2	10.2	26.479	0.00035868	4.991	341390000	9	A0A1W2PQV5;A0A1W2PNM1;A0A0A0MSE2;A0A0D9SFP2;E9PF18;Q16836;Q16836-3;Q16836-2;A0A1W2PQC2;A0A1W2PQ78;A0A1W2PRT2	A0A1W2PQV5;A0A1W2PNM1;A0A0A0MSE2;A0A0D9SFP2;E9PF18;Q16836;Q16836-3;Q16836-2;A0A1W2PQC2;A0A1W2PQ78;A0A1W2PRT2	Hydroxyacyl-coenzyme A dehydrogenase, mitochondrial	HADH
1590800	4863100	6772800	0	6315500	0	1371300	3465400				Homo sapiens	biological regulation;cellular component organization;cellular component organization or biogenesis;cellular localization;cellular macromolecule localization;cellular membrane organization;cellular process;cellular protein localization;localization;macromolecule localization;membrane organization;nuclear membrane organization;positive regulation of ATPase activity;positive regulation of catalytic…	ATPase activator activity;ATPase binding;ATPase regulator activity;binding;cytoskeletal protein binding;enzyme activator activity;enzyme binding;enzyme regulator activity;nucleoside-triphosphatase regulator activity;protein binding	cell part;integral to membrane;intracellular membrane-bounded organelle;intracellular organelle;intracellular organelle part;intracellular part;intrinsic to membrane;membrane;membrane part;membrane-bounded organelle;nuclear inner membrane;nuclear membrane;nuclear part;nucleus;organelle;organelle inner membrane;organelle membrane;organelle part	1	1	1	7.3	7.3	7.3	22.443	0.0016015	3.3868	259600000	2	H0YDU3;H0YD16;A0A0A0MSK5;Q5JTV8	H0YDU3;H0YD16;A0A0A0MSK5;Q5JTV8	Torsin-1A-interacting protein 1	TOR1AIP1
5364200	3956100	3277400	2334600	7009400	5398300	3417500	1435000				Homo sapiens	biological regulation;cellular component organization;cellular component organization at cellular level;cellular component organization or biogenesis;cellular component organization or biogenesis at cellular level;cellular macromolecule metabolic process;cellular metabolic process;cellular process;cellular protein metabolic process;chromatin modification;chromatin organization;chromosome organiza…	amine binding;amino acid binding;arginine N-methyltransferase activity;binding;carboxylic acid binding;catalytic activity;cation binding;histone methyltransferase activity;histone-arginine N-methyltransferase activity;ion binding;metal ion binding;methyltransferase activity;modified amino acid binding;N-methyltransferase activity;protein methyltransferase activity;protein-arginine N-methyltransfe…	cell part;cytoplasm;cytoplasmic part;cytosol;intracellular non-membrane-bounded organelle;intracellular organelle;intracellular part;macromolecular complex;non-membrane-bounded organelle;organelle;ribonucleoprotein complex;ribosome	5	5	5	12.4	12.4	12.4	52.901	0	8.3633	596090000	7	A0A0A0MSN7;O60678-2;O60678;tr|A0A1U7QPC6|A0A1U7QPC6_MESAU	A0A0A0MSN7;O60678-2;O60678	Protein arginine N-methyltransferase 3	PRMT3
0	0	0	0	1748000	0	0	2553200				Homo sapiens	biological regulation;biosynthetic process;cellular biosynthetic process;cellular macromolecule biosynthetic process;cellular macromolecule metabolic process;cellular metabolic process;cellular nitrogen compound metabolic process;cellular process;gene expression;macromolecule biosynthetic process;macromolecule metabolic process;metabolic process;negative regulation of biological process;negative …	binding;nucleic acid binding;nucleotide binding;RNA binding	cell part;cytoplasmic part;intracellular membrane-bounded organelle;intracellular organelle;intracellular organelle part;intracellular part;macromolecular complex;membrane-bounded organelle;mitochondrion;NELF complex;nuclear part;nucleoplasm;nucleoplasm part;nucleus;organelle;organelle part;protein complex;transcription elongation factor complex	2	2	2	18.9	18.9	18.9	17.291	0.0021532	2.9091	34409000	2	A2ABK4;A0A0G2JI50;E9PD43;A0A0A0MT02;A0A0A0MSN9;P18615-4;P18615;E7ENC7;E7EWR7;tr|A0A1U7QVH4|A0A1U7QVH4_MESAU;P18615-3	A2ABK4;A0A0G2JI50;E9PD43;A0A0A0MT02;A0A0A0MSN9;P18615-4;P18615;E7ENC7;E7EWR7;tr|A0A1U7QVH4|A0A1U7QVH4_MESAU;P18615-3	Negative elongation factor E	NELFE
16858000	10647000	19320000	4067800	23245000	28530000	9519000	14241000				Homo sapiens	anatomical structure development;bone development;developmental process	binding;calcium ion binding;cation binding;ion binding;metal ion binding	cell part;cytoplasm;intracellular part	20	14	1	37.6	28.7	2.3	69.334	0	169.23	6214600000	87	A0A0A0MSQ0;P13797-3;P13797-2;P13797;H7C4N2;U3KQI3;C9JAM8	A0A0A0MSQ0;P13797-3;P13797-2;P13797	Plastin-3	PLS3
6938900	24980000	27771000	1545600	35210000	44971000	1345800	21174000				Homo sapiens	anatomical structure development;anatomical structure homeostasis;anatomical structure morphogenesis;biological regulation;catabolic process;cell morphogenesis;cell proliferation;cellular component morphogenesis;cellular component organization;cellular component organization or biogenesis;cellular developmental process;cellular process;cytokine production;defense response;developmental process;ho…	carboxylic ester hydrolase activity;catalytic activity;hydrolase activity;hydrolase activity, acting on ester bonds;lipase activity;sterol esterase activity	cell part;cytoplasmic part;extracellular membrane-bounded organelle;extracellular organelle;extracellular region part;extracellular vesicular exosome;intracellular membrane-bounded organelle;intracellular organelle;intracellular part;lysosome;lytic vacuole;membrane-bounded organelle;membrane-bounded vesicle;organelle;vacuole;vesicle	4	4	4	12	12	12	32.57	0	58.497	1803300000	16	A0A0A0MT32;P38571-2;P38571;Q5T073	A0A0A0MT32;P38571-2;P38571;Q5T073	Lysosomal acid lipase/cholesteryl ester hydrolase	LIPA
1253000	391270	138000	868730	0	288070	1629400	635940				Homo sapiens	biological regulation;cellular component organization;cellular component organization or biogenesis;cellular macromolecule metabolic process;cellular membrane organization;cellular metabolic process;cellular process;cellular protein metabolic process;endocytosis;establishment of localization;macromolecule metabolic process;membrane invagination;membrane organization;metabolic process;negative reg…	catalytic activity;cis-trans isomerase activity;isomerase activity;peptidyl-prolyl cis-trans isomerase activity	actin filament;axon;cell part;cell projection;cell projection part;cytoplasmic part;cytoskeletal part;early endosome;endosome;growth cone;intracellular membrane-bounded organelle;intracellular organelle;intracellular organelle part;intracellular part;macromolecular complex;membrane;membrane-bounded organelle;neuron projection;organelle;organelle part;protein complex;site of polarized growth	5	5	3	5.4	5.4	3.4	136.27	0	15.935	339150000	10	A0A0A0MT60;Q5T1M5;Q5T1M5-2	A0A0A0MT60;Q5T1M5;Q5T1M5-2	Peptidyl-prolyl cis-trans isomerase;FK506-binding protein 15	FKBP15
1481200	57888	305930	196470	0	225640	48687	0				Homo sapiens	cellular macromolecule metabolic process;cellular metabolic process;cellular process;cellular protein metabolic process;macromolecule metabolic process;macromolecule modification;metabolic process;primary metabolic process;protein autoubiquitination;protein metabolic process;protein modification by small protein conjugation;protein modification by small protein conjugation or removal;protein modi…	acid-amino acid ligase activity;ATPase activity;binding;catalytic activity;cation binding;hydrolase activity;hydrolase activity, acting on acid anhydrides;hydrolase activity, acting on acid anhydrides, in phosphorus-containing anhydrides;ion binding;ligase activity;ligase activity, forming carbon-nitrogen bonds;metal ion binding;nucleoside-triphosphatase activity;pyrophosphatase activity;small co…	cell part;cytoplasm;intracellular non-membrane-bounded organelle;intracellular organelle;intracellular organelle part;intracellular part;membrane;non-membrane-bounded organelle;nuclear part;nucleolus;organelle;organelle part	14	14	14	3.2	3.2	3.2	591.4	0	34.282	846190000	15	A0A0A0MTR7;A0A0A0MTC1;Q63HN8;Q63HN8-4;tr|A0A1U8BZL4|A0A1U8BZL4_MESAU;Q63HN8-6;Q63HN8-5	A0A0A0MTR7;A0A0A0MTC1;Q63HN8;Q63HN8-4	E3 ubiquitin-protein ligase RNF213	RNF213
14768000	4405400	9527500	3385800	9344400	13320000	5803900	4962300				Homo sapiens	aging;ameboidal cell migration;anatomical structure development;anatomical structure formation involved in morphogenesis;anatomical structure morphogenesis;axon ensheathment;biological adhesion;biological regulation;branching involved in ureteric bud morphogenesis;branching morphogenesis of a tube;cell adhesion;cell aging;cell cycle arrest;cell cycle process;cell junction assembly;cell junction o…	adenyl nucleotide binding;adenyl ribonucleotide binding;ATP binding;binding;catalytic activity;enzyme binding;kinase activity;kinase binding;molecular transducer activity;nucleotide binding;phosphotransferase activity, alcohol group as acceptor;protein binding;protein kinase activity;protein kinase binding;protein serine/threonine kinase activity;purine nucleotide binding;purine ribonucleoside tr…	actin filament bundle;actomyosin;adherens junction;anchoring junction;axon part;cell body;cell junction;cell part;cell projection;cell projection part;cell-cell junction;cell-substrate adherens junction;cell-substrate junction;contractile fiber part;costamere;cytoplasm;cytoplasmic part;cytoskeletal part;cytosol;dendritic shaft;focal adhesion;intracellular organelle part;intracellular part;lamelli…	9	9	9	23	23	23	51.419	0	19.421	14231000000	204	tr|A0A1U7RF83|A0A1U7RF83_MESAU;A0A0A0MTH3;Q13418;Q13418-2;Q13418-3;A0A087WWY6	tr|A0A1U7RF83|A0A1U7RF83_MESAU;A0A0A0MTH3;Q13418;Q13418-2;Q13418-3	Integrin-linked protein kinase	ILK
0	0	0	725910	1468900	0	4017800	717710				Homo sapiens	establishment of localization;establishment of protein localization;protein transport;transport		cell part;cytoplasmic part;Golgi apparatus;intracellular membrane-bounded organelle;intracellular organelle;intracellular organelle part;intracellular part;membrane;membrane-bounded organelle;nuclear part;nucleoplasm;organelle;organelle part	2	2	2	6.4	6.4	6.4	40.705	0.0021766	3.0254	103950000	3	A0A0A0MTP0;A0A0A0MTK0;Q7Z6B0-3;Q7Z6B0-2;Q7Z6B0;F5GWR1;F5GZH9;F5GWB1	A0A0A0MTP0;A0A0A0MTK0;Q7Z6B0-3;Q7Z6B0-2;Q7Z6B0;F5GWR1;F5GZH9;F5GWB1	Coiled-coil domain-containing protein 91	CCDC91
20268000	21112000	21808000	6251800	22849000	43268000	12616000	18354000				Homo sapiens	biological regulation;catabolic process;cell cycle arrest;cell cycle process;cellular catabolic process;cellular macromolecule catabolic process;cellular macromolecule metabolic process;cellular metabolic process;cellular process;cellular protein metabolic process;cellular response to chemical stimulus;cellular response to hypoxia;cellular response to oxygen levels;cellular response to stimulus;c…	binding;enzyme binding;protein binding;ubiquitin protein ligase binding	cell part;Cul2-RING ubiquitin ligase complex;cullin-RING ubiquitin ligase complex;cytoplasmic part;cytoplasmic ubiquitin ligase complex;cytosol;intracellular non-membrane-bounded organelle;intracellular organelle;intracellular organelle part;intracellular part;macromolecular complex;non-membrane-bounded organelle;nuclear part;nucleolus;nucleoplasm;organelle;organelle part;protein complex;ubiquiti…	18	18	18	25.9	25.9	25.9	88.505	0	131.53	8478600000	65	A0A0A0MTN0;Q13617;Q13617-2;Q5T2B5;tr|A0A1U7QSN5|A0A1U7QSN5_MESAU;Q5T2B7	A0A0A0MTN0;Q13617;Q13617-2;Q5T2B5;tr|A0A1U7QSN5|A0A1U7QSN5_MESAU	Cullin-2	CUL2
0	787540	417760	0	380070	0	0	0				Homo sapiens	cellular component assembly;cellular component assembly at cellular level;cellular component organization;cellular component organization at cellular level;cellular component organization or biogenesis;cellular component organization or biogenesis at cellular level;cellular macromolecular complex assembly;cellular macromolecular complex subunit organization;cellular macromolecule metabolic proces…	binding;cation binding;ion binding;metal ion binding;transition metal ion binding;zinc ion binding	cell part;intracellular membrane-bounded organelle;intracellular non-membrane-bounded organelle;intracellular organelle;intracellular organelle part;intracellular part;membrane-bounded organelle;non-membrane-bounded organelle;nuclear part;nucleolus;nucleoplasm;nucleus;organelle;organelle part	2	2	2	2.8	2.8	2.8	106.01	0.0026786	2.6148	68171000	4	A0A0A0MTP7;F8VXG7;Q99590-2;Q99590	A0A0A0MTP7;F8VXG7;Q99590-2;Q99590	Protein SCAF11	SCAF11
9476600	0	8495400	7073300	11986000	15353000	1239800	1129000				Homo sapiens		catalytic activity;hydroxypyruvate isomerase activity;intramolecular oxidoreductase activity;intramolecular oxidoreductase activity, interconverting aldoses and ketoses;isomerase activity		5	5	5	38	38	38	23.031	0	22.437	611950000	11	F6UJY9;J9JIE9;A0A0A0MTR5;E7EWH8;F6UJY1;Q5T013-3;Q5T013;H0YB18;H0YB70;Q5T013-2;Q5T013-4;tr|A0A1U8CK40|A0A1U8CK40_MESAU;tr|A0A1U8CTU3|A0A1U8CTU3_MESAU;tr|A0A1U7R9B7|A0A1U7R9B7_MESAU	F6UJY9;J9JIE9;A0A0A0MTR5;E7EWH8;F6UJY1;Q5T013-3;Q5T013;H0YB18;H0YB70;Q5T013-2;Q5T013-4	Hydroxypyruvate isomerase;Putative hydroxypyruvate isomerase	HYI
1237200000	1279800064	1679699968	549660032	1916600064	2114499968	1200700032	1412600064				Homo sapiens	alcohol biosynthetic process;alcohol catabolic process;alcohol metabolic process;aldehyde biosynthetic process;aldehyde catabolic process;anatomical structure formation involved in morphogenesis;angiogenesis;behavior;biological regulation;biosynthetic process;carbohydrate biosynthetic process;carbohydrate catabolic process;carbohydrate metabolic process;catabolic process;cellular aldehyde metabol…	binding;carbohydrate binding;catalytic activity;glucose-6-phosphate isomerase activity;intramolecular oxidoreductase activity;intramolecular oxidoreductase activity, interconverting aldoses and ketoses;intramolecular transferase activity;isomerase activity;monosaccharide binding;sugar binding	cell part;cell projection;cytoplasm;cytoplasmic part;cytosol;extracellular membrane-bounded organelle;extracellular organelle;extracellular region part;extracellular space;extracellular vesicular exosome;intracellular organelle part;intracellular part;membrane;membrane-bounded organelle;membrane-bounded vesicle;neuron projection;nuclear part;nucleoplasm;organelle;organelle part;plasma membrane;ve…	23	23	18	50.6	50.6	41.4	64.824	0	323.31	316040000000	571	A0A0A0MTS2;P06744;P06744-2;K7EQ48;A0A0J9YXP8;A0A0J9YYH3;A0A0J9YX90;K7EPY4;K7EP41;tr|A0A1U7QYI9|A0A1U7QYI9_MESAU;K7ELR7;K7ENA0;K7ERC6;K7ERK8;K7EIL4;K7ESF4	A0A0A0MTS2;P06744;P06744-2;K7EQ48;A0A0J9YXP8;A0A0J9YYH3;A0A0J9YX90	Glucose-6-phosphate isomerase	GPI
28052	14379	18643	52057	29998	69577	85625	31971				Homo sapiens	actin cytoskeleton organization;actin filament organization;actin filament-based movement;actin filament-based process;actin-mediated cell contraction;actin-myosin filament sliding;actomyosin structure organization;adult heart development;anatomical structure development;anatomical structure formation involved in morphogenesis;anatomical structure morphogenesis;biological regulation;blood coagula…	actin binding;actin filament binding;actinin binding;adenyl nucleotide binding;adenyl ribonucleotide binding;alpha-actinin binding;ATP binding;binding;calcium ion binding;calmodulin binding;catalytic activity;cation binding;cytoskeletal protein binding;enzyme binding;identical protein binding;ion binding;kinase activity;kinase binding;metal ion binding;muscle alpha-actinin binding;nucleotide bind…	cell part;chromosome;condensed chromosome;condensed nuclear chromosome;contractile fiber part;cytoplasmic part;cytoskeletal part;cytosol;extracellular membrane-bounded organelle;extracellular organelle;extracellular region;extracellular region part;extracellular vesicular exosome;I band;intracellular non-membrane-bounded organelle;intracellular organelle;intracellular organelle part;intracellular…	3	3	3	0.1	0.1	0.1	3994.6	0.0021665	2.9724	3343000000	8	A0A0A0MTS7;Q8WZ42-5;Q8WZ42-11;Q8WZ42-4;Q8WZ42-7;Q8WZ42-2;Q8WZ42;Q8WZ42-8;Q8WZ42-13;Q8WZ42-12;A0A0A0MRA3;Q8WZ42-3;Q8WZ42-10;Q8WZ42-9	A0A0A0MTS7;Q8WZ42-5;Q8WZ42-11;Q8WZ42-4;Q8WZ42-7;Q8WZ42-2;Q8WZ42;Q8WZ42-8;Q8WZ42-13;Q8WZ42-12;A0A0A0MRA3;Q8WZ42-3;Q8WZ42-10;Q8WZ42-9	Titin	TTN
1911900	1245900	1104900	380240	461370	1961000	478640	98049				Homo sapiens	biological regulation;cation homeostasis;cation transport;cellular cation homeostasis;cellular chemical homeostasis;cellular homeostasis;cellular ion homeostasis;cellular iron ion homeostasis;cellular metal ion homeostasis;cellular process;chemical homeostasis;establishment of localization;homeostatic process;ion homeostasis;ion transport;iron ion homeostasis;iron ion transport;metabolic process;…	4 iron, 4 sulfur cluster binding;binding;cation binding;ion binding;iron-responsive element binding;iron-sulfur cluster binding;metal cluster binding;metal ion binding;mRNA binding;nucleic acid binding;RNA binding;translation regulator activity;translation repressor activity	cell part;cytoplasm;intracellular part	5	5	5	4.8	4.8	4.8	105.06	0.00034247	4.2271	386440000	4	A0A0A6YY96;P48200;tr|A0A1U8BQE6|A0A1U8BQE6_MESAU;H0YNL8;P48200-2;H0YN46	A0A0A6YY96;P48200;tr|A0A1U8BQE6|A0A1U8BQE6_MESAU	Iron-responsive element-binding protein 2	IREB2
89511000	36582000	42498000	23859000	45367000	86604000	62657000	35102000				Homo sapiens	actin cytoskeleton organization;actin filament organization;actin filament polymerization;actin filament-based process;actin polymerization or depolymerization;cellular component assembly;cellular component assembly at cellular level;cellular component organization;cellular component organization at cellular level;cellular component organization or biogenesis;cellular component organization or bi…	actin binding;binding;cytoskeletal protein binding;protein binding	cell part;cytoplasmic membrane-bounded vesicle;cytoplasmic part;cytoplasmic vesicle;cytosol;Golgi apparatus;Golgi apparatus part;Golgi membrane;integral to membrane;intracellular membrane-bounded organelle;intracellular organelle;intracellular organelle part;intracellular part;intrinsic to membrane;membrane;membrane part;membrane-bounded organelle;membrane-bounded vesicle;organelle;organelle memb…	20	20	20	21.9	21.9	21.9	114.16	0	323.31	18101000000	130	A0A0A6YYL4;P57737-2;P57737-4;P57737;P57737-3;I3L167;E7EP81;I3L442;tr|A0A1U7QVC9|A0A1U7QVC9_MESAU;tr|A0A1U7QLY3|A0A1U7QLY3_MESAU;I3L359;I3L351;I3L2Y6;I3L1M1;I3NI06;I3L1G9;I3L258;I3L482;I3L0Z7;I3L0X8;I3L212;I3L426	A0A0A6YYL4;P57737-2;P57737-4;P57737;P57737-3	Coronin;Coronin-7	CORO7-PAM16;CORO7
10509000	2146100	6342100	0	3947100	3713300	3581900	0				Homo sapiens	biological regulation;biosynthetic process;cellular biosynthetic process;cellular component organization;cellular component organization or biogenesis;cellular lipid metabolic process;cellular membrane organization;cellular metabolic process;cellular process;cellular response to stimulus;endocytosis;establishment of localization;glycerolipid biosynthetic process;glycerolipid metabolic process;gly…	1-phosphatidylinositol 4-kinase activity;adenyl nucleotide binding;adenyl ribonucleotide binding;ATP binding;binding;catalytic activity;inositol or phosphatidylinositol kinase activity;kinase activity;lipid kinase activity;nucleotide binding;phosphatidylinositol kinase activity;phosphotransferase activity, alcohol group as acceptor;purine nucleotide binding;purine ribonucleoside triphosphate bind…	cell part;cytoplasm;cytoplasmic part;cytosol;endoplasmic reticulum membrane;endoplasmic reticulum part;endosome;Golgi apparatus part;Golgi membrane;intracellular membrane-bounded organelle;intracellular organelle;intracellular organelle part;intracellular part;membrane;membrane part;membrane-bounded organelle;mitochondrial membrane;mitochondrial outer membrane;mitochondrial part;organelle;organel…	3	3	3	18.8	18.8	18.8	21.485	0	6.0372	610820000	9	F8W860;tr|A0A1U7QR57|A0A1U7QR57_MESAU;tr|A0A1U7R2G1|A0A1U7R2G1_MESAU;tr|A0A1U7RCL1|A0A1U7RCL1_MESAU;A0A0B4J1S8;Q9UBF8-3;Q9UBF8-2;Q9UBF8;E9PL47	F8W860;tr|A0A1U7QR57|A0A1U7QR57_MESAU;tr|A0A1U7R2G1|A0A1U7R2G1_MESAU;tr|A0A1U7RCL1|A0A1U7RCL1_MESAU;A0A0B4J1S8;Q9UBF8-3;Q9UBF8-2;Q9UBF8;E9PL47	Phosphatidylinositol 4-kinase beta	PI4KB
39706000	22285000	25799000	21660000	22104000	49657000	37999000	21988000				Homo sapiens	anatomical structure formation involved in morphogenesis;angiogenesis;biological regulation;biosynthetic process;cell differentiation;cellular biosynthetic process;cellular developmental process;cellular macromolecule biosynthetic process;cellular macromolecule metabolic process;cellular metabolic process;cellular nitrogen compound metabolic process;cellular process;cellular protein metabolic pro…	acetyltransferase activity;binding;catalytic activity;N-acetyltransferase activity;N-acyltransferase activity;ribonucleoprotein binding;ribosome binding;transferase activity;transferase activity, transferring acyl groups;transferase activity, transferring acyl groups other than amino-acyl groups	cell part;cytoplasm;cytoplasmic part;intracellular membrane-bounded organelle;intracellular organelle;intracellular organelle part;intracellular part;macromolecular complex;membrane;membrane-bounded organelle;NatA complex;N-terminal protein acetyltransferase complex;nuclear part;nucleoplasm part;nucleus;organelle;organelle part;protein acetyltransferase complex;protein complex;transcription facto…	25	25	25	30.2	30.2	30.2	101.2	0	170.23	13654000000	133	A0A0B4J1W3;Q9BXJ9;Q9BXJ9-4;tr|A0A1U8C3T6|A0A1U8C3T6_MESAU;Q6N069;Q6N069-5;Q6N069-4;Q6N069-3;Q6N069-2;tr|A0A1U7RHW9|A0A1U7RHW9_MESAU	A0A0B4J1W3;Q9BXJ9;Q9BXJ9-4;tr|A0A1U8C3T6|A0A1U8C3T6_MESAU	N-alpha-acetyltransferase 15, NatA auxiliary subunit	NAA15
8550500	16620000	17180000	1748100	18531000	11489000	1779600	6968100				Homo sapiens	biological regulation;biosynthetic process;cellular biosynthetic process;cellular macromolecule biosynthetic process;cellular macromolecule metabolic process;cellular metabolic process;cellular nitrogen compound metabolic process;cellular process;establishment of localization;establishment of localization in cell;establishment of RNA localization;gene expression;intracellular transport;macromolec…	binding;cation binding;ion binding;metal ion binding;nucleic acid binding;nucleotide binding;transition metal ion binding;zinc ion binding	cell part;cytoplasm;extracellular membrane-bounded organelle;extracellular organelle;extracellular region part;extracellular vesicular exosome;intracellular membrane-bounded organelle;intracellular organelle;intracellular organelle part;intracellular part;membrane-bounded organelle;membrane-bounded vesicle;nuclear part;nucleoplasm;nucleus;organelle;organelle part;vesicle	5	5	4	37.2	37.2	37.2	15.763	0	15.413	2988000000	42	A0A0B4J1Z1;tr|A0A1U7QGV3|A0A1U7QGV3_MESAU;C9JAB2;tr|A0A1U7Q9C0|A0A1U7Q9C0_MESAU;Q16629-3;Q16629-2;Q16629-4;Q16629	A0A0B4J1Z1;tr|A0A1U7QGV3|A0A1U7QGV3_MESAU;C9JAB2;tr|A0A1U7Q9C0|A0A1U7Q9C0_MESAU;Q16629-3;Q16629-2;Q16629-4;Q16629	Serine/arginine-rich splicing factor 7	SRSF7
7407700	3912200	8875800	0	4891100	2534900	1280300	0				Homo sapiens	activation of immune response;biological regulation;cellular component organization;cellular component organization or biogenesis;cellular membrane organization;cellular process;complement activation;complement activation, classical pathway;defense response;endocytosis;establishment of localization;humoral immune response;immune effector process;immune response;immune system process;innate immune…	antigen binding;binding	blood microparticle;cell part;extracellular membrane-bounded organelle;extracellular organelle;extracellular region;extracellular region part;extracellular space;extracellular vesicular exosome;membrane;membrane-bounded organelle;membrane-bounded vesicle;organelle;plasma membrane;vesicle	4	2	2	26.5	12.6	12.6	23.15	0.00065681	3.671	782550000	3	A0A0B4J231;B9A064;P0CG04	A0A0B4J231;B9A064;P0CG04	Immunoglobulin lambda-like polypeptide 5;Ig lambda-1 chain C regions	IGLL5;IGLC1
0	0	0	0	0	0	0	16127000				Homo sapiens	anatomical structure development;apoptosis;biological regulation;blastocyst development;carbohydrate metabolic process;cell death;cellular carbohydrate metabolic process;cellular macromolecule metabolic process;cellular metabolic process;cellular process;cellular protein metabolic process;death;developmental process;glycosylation;macromolecule glycosylation;macromolecule metabolic process;macromo…	catalytic activity;dolichyl-diphosphooligosaccharide-protein glycotransferase activity;oligosaccharyl transferase activity;transferase activity;transferase activity, transferring glycosyl groups;transferase activity, transferring hexosyl groups	cell part;cytoplasmic part;endoplasmic reticulum membrane;endoplasmic reticulum part;extracellular membrane-bounded organelle;extracellular organelle;extracellular region part;extracellular vesicular exosome;integral to membrane;intracellular organelle part;intracellular part;intrinsic to membrane;macromolecular complex;membrane;membrane part;membrane-bounded organelle;membrane-bounded vesicle;ol…	1	1	1	18.5	18.5	18.5	7.2883	0.00097213	3.496	51864000	1	F5H895;A0A0B4J239;F5GXX5;tr|A0A1U7Q2W9|A0A1U7Q2W9_MESAU;sp|P61806|DAD1_MESAU;P61803	F5H895;A0A0B4J239;F5GXX5;tr|A0A1U7Q2W9|A0A1U7Q2W9_MESAU;sp|P61806|DAD1_MESAU;P61803	Dolichyl-diphosphooligosaccharide--protein glycosyltransferase subunit DAD1	DAD1
8892800	10928000	121100000	3857400	3348400	16435000	10980000	8447200				Homo sapiens	anatomical structure homeostasis;biological regulation;cell death;cellular process;cytolysis;death;defense response;defense response to bacterium;homeostatic process;inflammatory response;multi-organism process;regulation of biological quality;response to bacterium;response to biotic stimulus;response to other organism;response to stimulus;response to stress;response to wounding;retina homeostasi…	binding;catalytic activity;hydrolase activity;hydrolase activity, acting on glycosyl bonds;hydrolase activity, hydrolyzing O-glycosyl compounds;identical protein binding;lysozyme activity;protein binding	extracellular membrane-bounded organelle;extracellular organelle;extracellular region;extracellular region part;extracellular space;extracellular vesicular exosome;membrane-bounded organelle;membrane-bounded vesicle;organelle;vesicle	3	3	3	26	26	26	11.488	0	36.284	3201100000	32	F8VV32;A0A0B4J259;P61626	F8VV32;A0A0B4J259;P61626	Lysozyme;Lysozyme C	LYZ
34578000	5238700	7698600	7888800	18743000	29912000	14724000	9181400				Homo sapiens	axon guidance;cell cycle phase;cell cycle process;cellular component assembly;cellular component assembly at cellular level;cellular component organization;cellular component organization at cellular level;cellular component organization or biogenesis;cellular component organization or biogenesis at cellular level;cellular macromolecular complex assembly;cellular macromolecular complex subunit or…	binding;catalytic activity;G-protein coupled receptor activity;GTP binding;GTPase activity;guanyl nucleotide binding;guanyl ribonucleotide binding;hydrolase activity;hydrolase activity, acting on acid anhydrides;hydrolase activity, acting on acid anhydrides, in phosphorus-containing anhydrides;molecular transducer activity;nucleoside-triphosphatase activity;nucleotide binding;peptide binding;puri…	axon;cell body;cell part;cell periphery;cell projection;cytoplasm;cytoskeletal part;dendrite;extracellular membrane-bounded organelle;extracellular organelle;extracellular region part;extracellular vesicular exosome;integral to membrane;intracellular membrane-bounded organelle;intracellular organelle;intracellular organelle part;intracellular part;intrinsic to membrane;macromolecular complex;memb…	17	3	3	45.1	12	12	50.418	0	66.55	3790000000	48	tr|A0A1U7QRM6|A0A1U7QRM6_MESAU;A0A0B4J269;Q13509;Q13509-2;G3V2A3;G3V5W4;G3V2R8;G3V3R4;G3V2N6	tr|A0A1U7QRM6|A0A1U7QRM6_MESAU;A0A0B4J269;Q13509;Q13509-2	Tubulin beta-3 chain	TUBB3
0	0	0	2022600	0	0	2715800	0				Homo sapiens	cellular process;ER to Golgi vesicle-mediated transport;establishment of localization;establishment of localization in cell;Golgi vesicle transport;intracellular transport;transport;vesicle-mediated transport		cell part;cytoplasm;cytoplasmic part;endoplasmic reticulum;Golgi apparatus;intracellular;intracellular membrane-bounded organelle;intracellular organelle;intracellular part;membrane-bounded organelle;organelle;perinuclear region of cytoplasm	2	2	2	24.8	24.8	24.8	12.561	0.00067912	4.1267	2652900000	4	H3BUK6;tr|A0A1U7QG43|A0A1U7QG43_MESAU;A0A0B4J294;H3BP13;Q9UL33-2;Q9UL33;H3BPN3;A0A0B4J286;H3BQQ8	H3BUK6;tr|A0A1U7QG43|A0A1U7QG43_MESAU;A0A0B4J294;H3BP13;Q9UL33-2;Q9UL33;H3BPN3;A0A0B4J286;H3BQQ8	Trafficking protein particle complex subunit 2-like protein	TRAPPC2L
1859000	0	929120	0	2903100	1442300	0	0				Homo sapiens	alcohol metabolic process;biological regulation;carbohydrate metabolic process;carbohydrate phosphorylation;cellular carbohydrate metabolic process;cellular metabolic process;cellular process;cellular response to biotic stimulus;cellular response to chemical stimulus;cellular response to cytokine stimulus;cellular response to interleukin-13;cellular response to interleukin-4;cellular response to …	adenyl nucleotide binding;adenyl ribonucleotide binding;ATP binding;binding;catalytic activity;kinase activity;nucleotide binding;phosphotransferase activity, alcohol group as acceptor;purine nucleotide binding;purine ribonucleoside triphosphate binding;purine ribonucleotide binding;ribonucleotide binding;sedoheptulokinase activity;transferase activity;transferase activity, transferring phosphoru…	cell part;cytoplasm;intracellular part	3	3	3	10.5	10.5	10.5	51.504	0	11.796	149800000	6	A0A0B4J2A0;Q9UHJ6;tr|A0A1U7QJN9|A0A1U7QJN9_MESAU	A0A0B4J2A0;Q9UHJ6	Sedoheptulokinase	TRPV1;SHPK
1155100	3819700	2343400	845090	3887900	5919000	1331300	1130700				Homo sapiens	alcohol metabolic process;biosynthetic process;carboxylic acid metabolic process;cellular ketone metabolic process;cellular lipid metabolic process;cellular metabolic process;cellular process;cellular response to chemical stimulus;cellular response to hypoxia;cellular response to oxygen levels;cellular response to stimulus;cellular response to stress;cholesterol biosynthetic process;cholesterol m…	acetyl-CoA C-acyltransferase activity;C-acyltransferase activity;catalytic activity;transferase activity;transferase activity, transferring acyl groups;transferase activity, transferring acyl groups other than amino-acyl groups	cell part;cytoplasmic part;extracellular membrane-bounded organelle;extracellular organelle;extracellular region part;extracellular vesicular exosome;intracellular membrane-bounded organelle;intracellular organelle;intracellular organelle part;intracellular part;membrane;membrane-bounded organelle;membrane-bounded vesicle;mitochondrial inner membrane;mitochondrial membrane;mitochondrial part;mito…	4	4	4	11.9	11.9	11.9	41.601	0.000356	4.8677	478480000	10	A0A0B4J2A4;P42765;K7EME0;tr|A0A1U7QZP2|A0A1U7QZP2_MESAU	A0A0B4J2A4;P42765;K7EME0;tr|A0A1U7QZP2|A0A1U7QZP2_MESAU	3-ketoacyl-CoA thiolase, mitochondrial	ACAA2
0	0	12164000	0	0	0	0	0				Homo sapiens				1	1	1	19.8	19.8	19.8	10.429	0	77.662	132160000	2	S4R460;A0A0B4J2B5	S4R460;A0A0B4J2B5		IGHV3OR16-9
4285200	6274300	2536500	7484600	12356000	14022000	11862000	8172700				Homo sapiens	signaling		cell part;membrane;synapse	5	5	5	23	23	23	26.941	0	13.851	961240000	17	F8WF49;A0A0B4J2C2;tr|A0A1U7QRP8|A0A1U7QRP8_MESAU;tr|A0A1U8CLY1|A0A1U8CLY1_MESAU;tr|A0A1U8CVR3|A0A1U8CVR3_MESAU;tr|A0A1U8CUN6|A0A1U8CUN6_MESAU;Q9Y2H0-3;Q9Y2H0-1;Q9Y2H0;A0A087X246	F8WF49;A0A0B4J2C2;tr|A0A1U7QRP8|A0A1U7QRP8_MESAU;tr|A0A1U8CLY1|A0A1U8CLY1_MESAU;tr|A0A1U8CVR3|A0A1U8CVR3_MESAU;tr|A0A1U8CUN6|A0A1U8CUN6_MESAU;Q9Y2H0-3;Q9Y2H0-1;Q9Y2H0	Disks large-associated protein 4	DLGAP4
1144800000	432049984	589310016	228690000	815900032	557089984	529700000	199830000				Homo sapiens	biological regulation;calcium ion homeostasis;calcium ion transport;cation homeostasis;cation transport;cellular calcium ion homeostasis;cellular cation homeostasis;cellular chemical homeostasis;cellular divalent inorganic cation homeostasis;cellular homeostasis;cellular ion homeostasis;cellular metal ion homeostasis;cellular process;chemical homeostasis;divalent inorganic cation homeostasis;diva…	binding;calcium ion binding;cation binding;ion binding;metal ion binding	cell part;cytoplasm;cytoplasmic part;endosome;extracellular membrane-bounded organelle;extracellular organelle;extracellular region part;extracellular space;extracellular vesicular exosome;intracellular membrane-bounded organelle;intracellular organelle;intracellular part;late endosome;membrane-bounded organelle;membrane-bounded vesicle;multivesicular body;nucleus;organelle;vesicle	9	9	7	52.1	52.1	41.5	21.525	0	319.07	42793000000	133	Q5W0H4;A0A0B4J2C3;P13693;J3KPG2;E9PJF7;P13693-2;H0YCX0;Q9HAU6;Q56UQ5	Q5W0H4;A0A0B4J2C3;P13693;J3KPG2;E9PJF7;P13693-2	Translationally-controlled tumor protein	TPT1
20493000	105550000	133590000	18720000	242300000	135390000	22582000	153420000				Homo sapiens	age-dependent response to oxidative stress;age-dependent response to reactive oxygen species;amine metabolic process;anatomical structure development;apoptotic mitochondrial changes;behavior;biological regulation;biosynthetic process;carboxylic acid metabolic process;cation homeostasis;cell development;cell differentiation;cellular amine metabolic process;cellular amino acid metabolic process;cel…	antioxidant activity;binding;catalytic activity;cation binding;DNA binding;identical protein binding;ion binding;manganese ion binding;metal ion binding;nucleic acid binding;oxidoreductase activity;oxidoreductase activity, acting on superoxide radicals as acceptor;oxygen binding;protein binding;superoxide dismutase activity;transition metal ion binding	cell part;cytoplasmic part;extracellular membrane-bounded organelle;extracellular organelle;extracellular region part;extracellular vesicular exosome;intracellular membrane-bounded organelle;intracellular non-membrane-bounded organelle;intracellular organelle;intracellular organelle lumen;intracellular organelle part;intracellular part;membrane;membrane-bounded organelle;membrane-bounded vesicle;…	6	6	6	26.6	26.6	26.6	24.75	0	323.31	9263300000	45	A0A0C4DFU2;P04179-4;P04179;F5H3C5;F5H4R2;A0A0C4DFU1;F5GYZ5;P04179-2;G8JLJ2;A0A0C4DG56;tr|A0A1U7QH60|A0A1U7QH60_MESAU;P04179-3;G5E9P6;F5GXZ9	A0A0C4DFU2;P04179-4;P04179;F5H3C5;F5H4R2;A0A0C4DFU1;F5GYZ5;P04179-2;G8JLJ2;A0A0C4DG56;tr|A0A1U7QH60|A0A1U7QH60_MESAU;P04179-3	Superoxide dismutase;Superoxide dismutase [Mn], mitochondrial	SOD2
0	3262200	918740	2568000	7352700	53299	48445	0				Homo sapiens			cell part;cytoplasm;cytoplasmic part;cytoskeletal part;intracellular organelle part;intracellular part;microtubule organizing center;organelle part;spindle pole	3	2	2	0.8	0.5	0.5	338.17	0.0091387	2.0595	2717800000	6	A0A0C4DFX2;Q5TBA9;tr|A0A1U7R0N0|A0A1U7R0N0_MESAU	A0A0C4DFX2;Q5TBA9;tr|A0A1U7R0N0|A0A1U7R0N0_MESAU	Protein furry homolog	FRY
1396900	1544600	3191100	0	2903800	2934200	0	0				Homo sapiens	biological regulation;biosynthetic process;cellular biosynthetic process;cellular macromolecule biosynthetic process;cellular macromolecule metabolic process;cellular metabolic process;cellular nitrogen compound metabolic process;cellular process;developmental process;gene expression;macromolecule biosynthetic process;macromolecule metabolic process;metabolic process;multicellular organismal deve…	binding;chromatin binding	cell part;cytoplasm;intracellular organelle part;intracellular part;macromolecular complex;NELF complex;nuclear part;nucleoplasm;nucleoplasm part;organelle part;protein complex;transcription elongation factor complex	3	3	3	13.3	13.3	13.3	32.401	0.00066778	3.8761	179560000	4	C9JHL4;A0A0C4DFX9;Q9H3P2;H7C0W2;C9JEM7;H7C2C7;tr|A0A1U7Q4T2|A0A1U7Q4T2_MESAU;H0Y3X6;H7C3C2;F8W954;F8WF98;H7C2M8	C9JHL4;A0A0C4DFX9;Q9H3P2;H7C0W2;C9JEM7;H7C2C7;tr|A0A1U7Q4T2|A0A1U7Q4T2_MESAU;H0Y3X6	Negative elongation factor A	NELFA
0	873430	1224700	0	1625200	3839300	0	0				Homo sapiens	anatomical structure development;autophagy;binding of sperm to zona pellucida;catabolic process;cell recognition;cell-cell recognition;cellular catabolic process;cellular lipid metabolic process;cellular macromolecule metabolic process;cellular metabolic process;cellular process;cellular process involved in reproduction;cellular protein metabolic process;central nervous system development;develop…	arylsulfatase activity;binding;calcium ion binding;catalytic activity;cation binding;cerebroside-sulfatase activity;hydrolase activity;hydrolase activity, acting on ester bonds;ion binding;metal ion binding;sulfuric ester hydrolase activity	acrosomal vesicle;cell part;cytoplasmic membrane-bounded vesicle;cytoplasmic part;cytoplasmic vesicle;endoplasmic reticulum lumen;endoplasmic reticulum part;endosome;extracellular membrane-bounded organelle;extracellular organelle;extracellular region part;extracellular space;extracellular vesicular exosome;extrinsic to external side of plasma membrane;extrinsic to membrane;extrinsic to plasma me…	2	2	2	5.9	5.9	5.9	53.806	0	9.9459	132890000	1	A0A0C4DFZ2;P15289-2;P15289	A0A0C4DFZ2;P15289-2;P15289	Arylsulfatase A;Arylsulfatase A component B;Arylsulfatase A component C	ARSA
1012400000	463249984	759340032	252100000	803500032	846910016	358220000	419620000				Homo sapiens	biological adhesion;biosynthetic process;catabolic process;cell adhesion;cellular biosynthetic process;cellular catabolic process;cellular component assembly;cellular component assembly at cellular level;cellular component disassembly;cellular component disassembly at cellular level;cellular component organization;cellular component organization at cellular level;cellular component organization o…	binding;laminin receptor activity;receptor activity;ribonucleoprotein binding;ribosome binding;structural constituent of ribosome;structural molecule activity	90S preribosome;cell part;cytoplasm;cytoplasmic part;cytosol;cytosolic small ribosomal subunit;extracellular membrane-bounded organelle;extracellular organelle;extracellular region part;extracellular vesicular exosome;intracellular membrane-bounded organelle;intracellular organelle;intracellular organelle part;intracellular part;macromolecular complex;membrane;membrane-bounded organelle;membrane-…	14	14	14	65.8	65.8	65.8	29.404	0	323.31	115920000000	602	C9J9K3;tr|A0A1U7QWC5|A0A1U7QWC5_MESAU;A0A0C4DG17;P08865;F8WD59	C9J9K3;tr|A0A1U7QWC5|A0A1U7QWC5_MESAU;A0A0C4DG17;P08865;F8WD59	40S ribosomal protein SA	RPSA
428140	562340	567280	0	494760	1347800	0	0				Homo sapiens	biological regulation;cellular macromolecule metabolic process;cellular metabolic process;cellular nitrogen compound metabolic process;cellular process;macromolecule metabolic process;metabolic process;mRNA metabolic process;mRNA processing;nitrogen compound metabolic process;nuclear mRNA splicing, via spliceosome;nucleic acid metabolic process;nucleobase-containing compound metabolic process;pri…	adenyl nucleotide binding;adenyl ribonucleotide binding;ATP binding;ATPase activity;ATPase activity, coupled;ATP-dependent helicase activity;ATP-dependent RNA helicase activity;binding;catalytic activity;helicase activity;hydrolase activity;hydrolase activity, acting on acid anhydrides;hydrolase activity, acting on acid anhydrides, in phosphorus-containing anhydrides;nucleic acid binding;nucleosi…	Cajal body;cell part;cytoplasm;intracellular membrane-bounded organelle;intracellular non-membrane-bounded organelle;intracellular organelle;intracellular organelle part;intracellular part;membrane-bounded organelle;non-membrane-bounded organelle;nuclear body;nuclear part;nuclear speck;nucleolus;nucleoplasm part;nucleus;organelle;organelle part	2	2	2	1.9	1.9	1.9	117.2	0	13.432	180220000	5	tr|A0A1U7R308|A0A1U7R308_MESAU;A0A0C4DG89;Q7L014;H0Y9U3	tr|A0A1U7R308|A0A1U7R308_MESAU;A0A0C4DG89;Q7L014;H0Y9U3	Probable ATP-dependent RNA helicase DDX46	DDX46
6006800	3487500	2641200	1329600	4739000	0	4738500	3093100				Homo sapiens	biological regulation;defense response;inflammatory response;negative regulation of ATPase activity;negative regulation of biological process;negative regulation of catalytic activity;negative regulation of hydrolase activity;negative regulation of ion transport;negative regulation of molecular function;negative regulation of transport;regulation of ATPase activity;regulation of biological proces…	adenyl nucleotide binding;adenyl ribonucleotide binding;ATP binding;binding;catalytic activity;kinase activity;lipid binding;nucleotide binding;phosphatidylinositol binding;phospholipid binding;phosphotransferase activity, alcohol group as acceptor;protein binding;protein C-terminus binding;protein kinase activity;purine nucleotide binding;purine ribonucleoside triphosphate binding;purine ribonuc…	cell part;cytoplasm;cytoplasmic part;cytoskeletal part;intracellular membrane-bounded organelle;intracellular organelle;intracellular organelle part;intracellular part;membrane;membrane-bounded organelle;microtubule organizing center;nucleus;organelle;organelle part;plasma membrane	2	2	2	6.4	6.4	6.4	54.737	0.00035063	4.5577	501280000	2	E9PD56;H7BYG4;W5RWE6;A0A0C4DG95;Q7Z7A4-2;Q7Z7A4-6;Q7Z7A4-4;Q7Z7A4;F8WAW8;F8WDF7;U3KQS4;H7C4V0;tr|A0A1U8C6N2|A0A1U8C6N2_MESAU;tr|A0A1U7QYL6|A0A1U7QYL6_MESAU;tr|A0A1U7QN72|A0A1U7QN72_MESAU;Q7Z7A4-3;Q7Z7A4-5;Q7Z7A4-7	E9PD56;H7BYG4;W5RWE6;A0A0C4DG95;Q7Z7A4-2;Q7Z7A4-6;Q7Z7A4-4;Q7Z7A4;F8WAW8;F8WDF7;U3KQS4;H7C4V0;tr|A0A1U8C6N2|A0A1U8C6N2_MESAU;tr|A0A1U7QYL6|A0A1U7QYL6_MESAU;tr|A0A1U7QN72|A0A1U7QN72_MESAU;Q7Z7A4-3;Q7Z7A4-5;Q7Z7A4-7	PX domain-containing protein kinase-like protein	PXK
3461700	4431500	6181300	5333500	2031500	2816400	7049200	3536600				Homo sapiens	biological regulation;negative regulation of apoptosis;negative regulation of biological process;negative regulation of catalytic activity;negative regulation of cell death;negative regulation of cellular process;negative regulation of endopeptidase activity;negative regulation of hydrolase activity;negative regulation of molecular function;negative regulation of peptidase activity;negative regul…	cysteine-type endopeptidase inhibitor activity;endopeptidase inhibitor activity;endopeptidase regulator activity;enzyme inhibitor activity;enzyme regulator activity;peptidase inhibitor activity;peptidase regulator activity	cell part;cytoplasm;cytoplasmic part;cytosol;intracellular part;membrane	8	8	8	17.1	17.1	17.1	69.749	0	102.22	1462000000	23	E7ES10;E9PCH5;E7EVY3;B7Z574;A0A0C4DGB5;P20810-3;P20810-4;P20810-8;P20810-2;P20810;P20810-9;P20810-5;P20810-10;P20810-7;P20810-6;H0Y7F0;H0Y9H6;E9PDE4;E7EQ12;A0A0A0MR45;E7EQA0;H0YD33;F8W7E0;D6RC54;A0A0C4DGD1;D6RAA8;E7EQK6;H0Y944;H0YA91;E9PSG1	E7ES10;E9PCH5;E7EVY3;B7Z574;A0A0C4DGB5;P20810-3;P20810-4;P20810-8;P20810-2;P20810;P20810-9;P20810-5;P20810-10;P20810-7;P20810-6;H0Y7F0;H0Y9H6;E9PDE4;E7EQ12;A0A0A0MR45;E7EQA0;H0YD33	Calpastatin	CAST
0	0	0	0	1017100	0	0	5327600				Homo sapiens		binding;catalytic activity;cation binding;hydrolase activity;ion binding;metal ion binding;metallopeptidase activity;peptidase activity;peptidase activity, acting on L-amino acid peptides	cell part;cytoplasmic part;endoplasmic reticulum membrane;endoplasmic reticulum part;integral to membrane;intracellular organelle part;intracellular part;intrinsic to membrane;membrane;membrane part;organelle membrane;organelle part	3	3	3	8.8	8.8	8.8	39.208	0	5.8134	92509000	3	A0A0C4DGF0;E7ER77;Q7Z2K6-2;Q7Z2K6;tr|A0A1U8BQU9|A0A1U8BQU9_MESAU	A0A0C4DGF0;E7ER77;Q7Z2K6-2;Q7Z2K6;tr|A0A1U8BQU9|A0A1U8BQU9_MESAU	Endoplasmic reticulum metallopeptidase 1	ERMP1
0	5770300	2873200	0	8683000	0	0	2698900				Homo sapiens	apoptosis;biological regulation;biosynthetic process;cell cycle;cell death;cellular biosynthetic process;cellular macromolecule biosynthetic process;cellular macromolecule metabolic process;cellular metabolic process;cellular nitrogen compound metabolic process;cellular process;death;gene expression;macromolecule biosynthetic process;macromolecule metabolic process;metabolic process;mRNA metaboli…	ligand-dependent nuclear receptor transcription coactivator activity;protein binding transcription factor activity;transcription coactivator activity;transcription cofactor activity;transcription factor binding transcription factor activity	cell part;cytoplasmic part;intracellular organelle part;intracellular part;nuclear part;nucleoplasm;organelle part;perinuclear region of cytoplasm	2	2	2	12.5	12.5	12.5	26.838	0	22.639	156960000	3	tr|A0A1U8C175|A0A1U8C175_MESAU;F5H3E1;F5H2E6;A0A0C4DGG8;Q8IX12-2;Q8IX12;F5H1H2	tr|A0A1U8C175|A0A1U8C175_MESAU;F5H3E1;F5H2E6;A0A0C4DGG8;Q8IX12-2;Q8IX12;F5H1H2	Cell division cycle and apoptosis regulator protein 1	CCAR1
360940	1175600	724200	0	830010	1939600	0	593640				Homo sapiens	ATP-dependent chromatin remodeling;biological regulation;biosynthetic process;cellular biosynthetic process;cellular component assembly;cellular component assembly at cellular level;cellular component organization;cellular component organization at cellular level;cellular component organization or biogenesis;cellular component organization or biogenesis at cellular level;cellular macromolecule bi…	adenyl nucleotide binding;adenyl ribonucleotide binding;ATP binding;ATPase activity;ATPase activity, coupled;ATP-dependent DNA helicase activity;ATP-dependent helicase activity;binding;catalytic activity;cation binding;DNA binding;DNA helicase activity;DNA-dependent ATPase activity;helicase activity;hydrolase activity;hydrolase activity, acting on acid anhydrides;hydrolase activity, acting on aci…	cell part;centrosome;chromatin;chromatin remodeling complex;chromosomal part;cytoplasm;cytoplasmic part;cytoskeletal part;histone deacetylase complex;intracellular membrane-bounded organelle;intracellular non-membrane-bounded organelle;intracellular organelle;intracellular organelle part;intracellular part;macromolecular complex;membrane;membrane-bounded organelle;microtubule organizing center;no…	7	7	5	4.3	4.3	3.1	217.1	0	9.5674	710350000	9	F5GWX5;A0A0C4DGG9;Q14839;Q14839-2;tr|A0A1U8BQE5|A0A1U8BQE5_MESAU;tr|A0A1U8BEA3|A0A1U8BEA3_MESAU	F5GWX5;A0A0C4DGG9;Q14839;Q14839-2;tr|A0A1U8BQE5|A0A1U8BQE5_MESAU	Chromodomain-helicase-DNA-binding protein 4	CHD4
0	2859600	140660000	0	0	0	0	1760200				Homo sapiens	anatomical structure homeostasis;biological regulation;homeostatic process;regulation of biological quality;retina homeostasis;tissue homeostasis	binding;carbohydrate binding	extracellular membrane-bounded organelle;extracellular organelle;extracellular region part;extracellular space;extracellular vesicular exosome;membrane-bounded organelle;membrane-bounded vesicle;organelle;vesicle	3	3	3	25.8	25.8	25.8	19.6	0	323.31	2202500000	19	A0A0C4DGN4;Q96DA0;I3L1H9;I3L3X0	A0A0C4DGN4;Q96DA0;I3L1H9;I3L3X0	Zymogen granule protein 16 homolog B	ZG16B
198050000	69163000	125520000	41819000	150070000	192130000	112410000	51063000				Homo sapiens	biological regulation;cellular component disassembly;cellular component disassembly at cellular level;cellular component organization;cellular component organization at cellular level;cellular component organization or biogenesis;cellular component organization or biogenesis at cellular level;cellular process;extracellular matrix disassembly;extracellular matrix organization;extracellular structu…	binding;calcium ion binding;calcium-dependent cysteine-type endopeptidase activity;catalytic activity;cation binding;cysteine-type endopeptidase activity;cysteine-type peptidase activity;endopeptidase activity;hydrolase activity;ion binding;metal ion binding;peptidase activity;peptidase activity, acting on L-amino acid peptides	cell part;cytoplasm;cytoplasmic part;cytosol;extracellular membrane-bounded organelle;extracellular organelle;extracellular region part;extracellular vesicular exosome;intracellular part;membrane;membrane-bounded organelle;membrane-bounded vesicle;organelle;plasma membrane;vesicle	9	9	2	49.4	49.4	20.5	33.786	0	323.31	12698000000	91	A0A0C4DGQ5;P04632;K7ELJ7;K7EM73;K7EIV0;A0A075B7C0;U3KQE2;K7EKD8;U3KPR7;K7ES78;K7EMQ1	A0A0C4DGQ5;P04632;K7ELJ7;K7EM73;K7EIV0;A0A075B7C0;U3KQE2;K7EKD8	Calpain small subunit 1	CAPNS1
0	0	0	0	0	0	0	7585800				Homo sapiens	biosynthetic process;carbohydrate metabolic process;cell activation;cellular biosynthetic process;cellular carbohydrate metabolic process;cellular macromolecule biosynthetic process;cellular macromolecule metabolic process;cellular metabolic process;cellular process;cellular protein metabolic process;cotranslational protein targeting to membrane;defense response;establishment of localization;esta…	catalytic activity;dolichyl-diphosphooligosaccharide-protein glycotransferase activity;oligosaccharyl transferase activity;transferase activity;transferase activity, transferring glycosyl groups;transferase activity, transferring hexosyl groups	cell part;cytoplasmic part;endoplasmic reticulum;endoplasmic reticulum membrane;endoplasmic reticulum part;integral to membrane;intracellular membrane-bounded organelle;intracellular organelle;intracellular organelle part;intracellular part;intrinsic to membrane;macromolecular complex;membrane;membrane part;membrane-bounded organelle;oligosaccharyltransferase complex;organelle;organelle membrane;…	2	2	2	12.3	12.3	12.3	17.105	0.00065317	3.5891	83444000	2	U3KQ84;A0A0C4DGS1;P39656-2;P39656-3;P39656;tr|A0A1U7QX96|A0A1U7QX96_MESAU	U3KQ84;A0A0C4DGS1;P39656-2;P39656-3;P39656;tr|A0A1U7QX96|A0A1U7QX96_MESAU	Dolichyl-diphosphooligosaccharide--protein glycosyltransferase 48 kDa subunit	DDOST
17042000	15154000	24888000	1176500	30829000	40957000	5396100	19303000				Homo sapiens	biological regulation;cellular component organization;cellular component organization or biogenesis;cellular process;cellular response to acid;cellular response to amine stimulus;cellular response to amino acid stimulus;cellular response to chemical stimulus;cellular response to endogenous stimulus;cellular response to organic nitrogen;cellular response to organic substance;cellular response to s…		cell part;cytoplasm;cytoplasmic part;cytosol;endosomal part;intracellular membrane-bounded organelle;intracellular organelle;intracellular organelle part;intracellular part;lysosome;lytic vacuole;macromolecular complex;membrane part;membrane-bounded organelle;organelle;organelle part;protein complex;Ragulator complex;vacuole	2	2	2	38	38	38	8.2153	0	24.464	649430000	8	R4GMU8;E9PLX3;tr|A0A1U8BY99|A0A1U8BY99_MESAU;tr|A0A1U7QD97|A0A1U7QD97_MESAU;A0A0C4DGV4;O43504	R4GMU8;E9PLX3;tr|A0A1U8BY99|A0A1U8BY99_MESAU;tr|A0A1U7QD97|A0A1U7QD97_MESAU;A0A0C4DGV4;O43504	Ragulator complex protein LAMTOR5	LAMTOR5
8963700	4052000	6051500	3387100	6827300	10451000	4614500	0				Homo sapiens				1	1	1	9.2	9.2	9.2	16.961	0	58.204	388580000	6	A0A0C4DGW6;A6NDU8	A0A0C4DGW6;A6NDU8	UPF0600 protein C5orf51	C5orf51
8112000	3265400	5152800	3421700	3417200	13465000	5008200	3672100				Homo sapiens	activation of immune response;activation of innate immune response;anaphase-promoting complex-dependent proteasomal ubiquitin-dependent protein catabolic process;anatomical structure morphogenesis;biological regulation;catabolic process;cell cycle;cell cycle arrest;cell cycle process;cell proliferation;cell surface receptor linked signaling pathway;cellular catabolic process;cellular macromolecul…		cell part;cullin-RING ubiquitin ligase complex;cytoplasmic part;cytosol;intracellular organelle part;intracellular part;macromolecular complex;nuclear part;nucleoplasm;organelle part;protein complex;SCF ubiquitin ligase complex;ubiquitin ligase complex	14	14	14	24.1	24.1	24.1	87.387	0	49.561	2534700000	29	A0A0C4DGX4;tr|A0A1U8D295|A0A1U8D295_MESAU;Q13616	A0A0C4DGX4;tr|A0A1U8D295|A0A1U8D295_MESAU;Q13616	Cullin-1	CUL1
0	583610	1797400	424580	780500	1383900	0	1223900				Homo sapiens	apoptosis;biological regulation;cell cycle phase;cell cycle process;cell death;cell division;cell proliferation;cellular component organization;cellular component organization at cellular level;cellular component organization or biogenesis;cellular component organization or biogenesis at cellular level;cellular macromolecule metabolic process;cellular metabolic process;cellular process;cellular p…	adenyl nucleotide binding;adenyl ribonucleotide binding;ATP binding;binding;catalytic activity;cyclin-dependent protein kinase activity;kinase activity;nucleotide binding;phosphotransferase activity, alcohol group as acceptor;protein kinase activity;protein serine/threonine kinase activity;purine nucleotide binding;purine ribonucleoside triphosphate binding;purine ribonucleotide binding;ribonucle…	cell part;cytoplasm;intracellular membrane-bounded organelle;intracellular organelle;intracellular organelle part;intracellular part;membrane-bounded organelle;nuclear part;nucleoplasm;nucleus;organelle;organelle part	3	3	3	6.2	6.2	6.2	60.291	0.00064977	3.542	373300000	4	tr|A0A1U8CIB8|A0A1U8CIB8_MESAU;Q5QPR4;J3QR29;A0A0D9SEI3;Q5QPR3;B7ZVY7;A0A0D9SER5;A0A0D9SEN2;J3QR44;Q9UQ88-5;Q9UQ88-10;P21127-12;P21127-4;P21127-5;P21127-10;P21127-6;P21127-9;Q9UQ88-4;P21127-8;Q9UQ88-3;Q9UQ88-2;P21127-3;P21127-2;Q9UQ88;P21127;Q9UQ88-9	tr|A0A1U8CIB8|A0A1U8CIB8_MESAU;Q5QPR4;J3QR29;A0A0D9SEI3;Q5QPR3;B7ZVY7;A0A0D9SER5;A0A0D9SEN2;J3QR44;Q9UQ88-5;Q9UQ88-10;P21127-12;P21127-4;P21127-5;P21127-10;P21127-6;P21127-9;Q9UQ88-4;P21127-8;Q9UQ88-3;Q9UQ88-2;P21127-3;P21127-2;Q9UQ88;P21127;Q9UQ88-9	Cyclin-dependent kinase 11A;Cyclin-dependent kinase 11B	CDK11A;CDK11B;CDC2L1
1722100	0	1213700	0	1396900	1973500	0	0				Homo sapiens	anatomical structure morphogenesis;biological regulation;biosynthetic process;cell surface receptor linked signaling pathway;cellular biosynthetic process;cellular macromolecule biosynthetic process;cellular macromolecule metabolic process;cellular metabolic process;cellular nitrogen compound metabolic process;cellular process;cellular response to stimulus;developmental process;macromolecule bios…	binding;chromatin binding;identical protein binding;nucleic acid binding transcription factor activity;protein binding;protein binding transcription factor activity;RNA polymerase II transcription cofactor activity;RNA polymerase II transcription corepressor activity;RNA polymerase II transcription factor binding transcription factor activity;RNA polymerase II transcription factor binding transcr…	cell part;cytoplasm;cytoplasmic part;cytosol;extracellular region part;extracellular space;intracellular membrane-bounded organelle;intracellular non-membrane-bounded organelle;intracellular organelle;intracellular organelle part;intracellular part;macromolecular complex;membrane-bounded organelle;non-membrane-bounded organelle;nuclear part;nucleolus;nucleoplasm;nucleoplasm part;nucleus;organelle…	2	2	2	3.7	3.7	3.7	74.9	0.00035211	4.6493	214410000	7	F5H7D6;H0YNT2;tr|A0A1U8C3B2|A0A1U8C3B2_MESAU;tr|A0A1U7QK62|A0A1U7QK62_MESAU;tr|A0A1U8CBD5|A0A1U8CBD5_MESAU;tr|A0A1U7QBR7|A0A1U7QBR7_MESAU;tr|A0A1U7QN28|A0A1U7QN28_MESAU;tr|A0A1U8CAR4|A0A1U8CAR4_MESAU;tr|A0A1U7QYA7|A0A1U7QYA7_MESAU;A0A0D9SES8;tr|A0A1U8C085|A0A1U8C085_MESAU;H0YKT5;tr|A0A1U8C096|A0A1U8C096_MESAU;H0YKN8;tr|A0A1U8CBD0|A0A1U8CBD0_MESAU;tr|A0A1U8CAQ9|A0A1U8CAQ9_MESAU;tr|A0A1U7QVM2|A0A1U…	F5H7D6;H0YNT2;tr|A0A1U8C3B2|A0A1U8C3B2_MESAU;tr|A0A1U7QK62|A0A1U7QK62_MESAU;tr|A0A1U8CBD5|A0A1U8CBD5_MESAU;tr|A0A1U7QBR7|A0A1U7QBR7_MESAU;tr|A0A1U7QN28|A0A1U7QN28_MESAU;tr|A0A1U8CAR4|A0A1U8CAR4_MESAU;tr|A0A1U7QYA7|A0A1U7QYA7_MESAU;A0A0D9SES8;tr|A0A1U8C085|A0A1U8C085_MESAU;H0YKT5;tr|A0A1U8C096|A0A1U8C096_MESAU;H0YKN8;tr|A0A1U8CBD0|A0A1U8CBD0_MESAU;tr|A0A1U8CAQ9|A0A1U8CAQ9_MESAU;tr|A0A1U7QVM2|A0A1U…	Transducin-like enhancer protein 3;Transducin-like enhancer protein 2;Transducin-like enhancer protein 4;Transducin-like enhancer protein 1	TLE3;TLE2;TLE4;TLE1
4578300	9249000	6812600	1390900	2114700	10297000	7855000	5883800				Homo sapiens	cellular component organization;cellular component organization at cellular level;cellular component organization or biogenesis;cellular component organization or biogenesis at cellular level;cellular process;cytoskeleton organization;microtubule cytoskeleton organization;microtubule-based process;organelle organization	enzyme regulator activity;GTPase regulator activity;guanyl-nucleotide exchange factor activity;nucleoside-triphosphatase regulator activity;Ran guanyl-nucleotide exchange factor activity;Ras guanyl-nucleotide exchange factor activity;small GTPase regulator activity	cell part;cytoplasmic microtubule;cytoplasmic part;cytoskeletal part;cytosol;intracellular membrane-bounded organelle;intracellular organelle;intracellular organelle part;intracellular part;macromolecular complex;membrane-bounded organelle;microtubule;nucleus;organelle;organelle part;protein complex	6	6	6	12.9	12.9	12.9	67.255	0	19.369	1374700000	17	A0A0D9SEU5;R4GMX8;Q6VN20-3;Q6VN20;Q6VN20-2;tr|A0A1U7R5V3|A0A1U7R5V3_MESAU;R4GMX7;R4GNA3;R4GN91	A0A0D9SEU5;R4GMX8;Q6VN20-3;Q6VN20;Q6VN20-2;tr|A0A1U7R5V3|A0A1U7R5V3_MESAU	Ran-binding protein 10	RANBP10
0	0	6597300	2644100	0	12137000	0	5740400				Homo sapiens	antigen processing and presentation;antigen processing and presentation of peptide antigen;antigen processing and presentation of peptide antigen via MHC class I;biological regulation;catabolic process;cellular catabolic process;cellular component organization;cellular component organization at cellular level;cellular component organization or biogenesis;cellular component organization or biogene…	acid-amino acid ligase activity;adenyl nucleotide binding;adenyl ribonucleotide binding;ATP binding;binding;catalytic activity;enzyme binding;ligase activity;ligase activity, forming carbon-nitrogen bonds;nucleotide binding;protein binding;purine nucleotide binding;purine ribonucleoside triphosphate binding;purine ribonucleotide binding;ribonucleotide binding;small conjugating protein ligase acti…	cell part;chromatin;chromosomal part;chromosome;cytoplasm;cytoplasmic part;cytosol;HULC complex;intracellular non-membrane-bounded organelle;intracellular organelle;intracellular organelle part;intracellular part;macromolecular complex;non-membrane-bounded organelle;nuclear chromatin;nuclear chromosome part;nuclear part;organelle;organelle part;protein complex;sex chromosome;ubiquitin conjugating…	1	1	1	14.3	14.3	14.3	13.635	0.0024038	2.6992	108480000	2	A0A0D9SG71;A0A0D9SEZ6;A0A0R4J2E5;tr|A0A1U7QP78|A0A1U7QP78_MESAU;P49459	A0A0D9SG71;A0A0D9SEZ6;A0A0R4J2E5;tr|A0A1U7QP78|A0A1U7QP78_MESAU;P49459	Ubiquitin-conjugating enzyme E2 A	UBE2A
3297100	608160	833680	0	1692500	5958100	529100	548680				Homo sapiens	biological regulation;biosynthetic process;cellular biosynthetic process;cellular component assembly;cellular component assembly at cellular level;cellular component organization;cellular component organization at cellular level;cellular component organization or biogenesis;cellular component organization or biogenesis at cellular level;cellular macromolecular complex assembly;cellular macromolec…	adenyl nucleotide binding;adenyl ribonucleotide binding;ATP binding;ATPase activity;ATPase activity, coupled;ATP-dependent DNA helicase activity;ATP-dependent helicase activity;ATP-dependent RNA helicase activity;binding;catalytic activity;CTPase activity;DNA binding;DNA helicase activity;DNA-dependent ATPase activity;eukaryotic initiation factor 4E binding;GTPase activity;helicase activity;hydro…	cell part;cytoplasm;cytoplasmic part;extracellular membrane-bounded organelle;extracellular organelle;extracellular region part;extracellular vesicular exosome;intracellular membrane-bounded organelle;intracellular non-membrane-bounded organelle;intracellular organelle;intracellular organelle part;intracellular part;macromolecular complex;membrane;membrane-bounded organelle;membrane-bounded vesic…	37	3	2	57.5	7.7	5	70.839	0	22.272	770100000	7	A0A0D9SFB3;A0A0D9SG12;A0A0D9SF53;O00571;O00571-2;A0A0J9YVQ7;A0A087WVZ1;A0A087WX09;B4DLA0;A0A0J9YYH6;D6RCM4;Q9NQI0-3;Q9NQI0-2;Q9NQI0-4;Q9NQI0;H0Y960;tr|A0A1U7QGE0|A0A1U7QGE0_MESAU	A0A0D9SFB3;A0A0D9SG12;A0A0D9SF53;O00571;O00571-2	ATP-dependent RNA helicase DDX3X	DDX3X
1754700	1898200	2575900	1243500	2625300	6543800	607170	1207100				Homo sapiens	actin filament capping;apoptosis;axon guidance;biological regulation;cell death;cellular component disassembly;cellular component disassembly at cellular level;cellular component disassembly involved in apoptosis;cellular component organization;cellular component organization at cellular level;cellular component organization or biogenesis;cellular component organization or biogenesis at cellular …	actin binding;binding;calcium ion binding;cation binding;cytoskeletal protein binding;ion binding;metal ion binding;protein binding;structural constituent of cytoskeleton;structural molecule activity	adherens junction;anchoring junction;cell cortex part;cell junction;cell part;cell-cell adherens junction;cell-cell junction;contractile fiber part;cuticular plate;cytoplasmic part;cytoskeletal part;cytoskeleton;cytosol;extracellular membrane-bounded organelle;extracellular organelle;extracellular region part;extracellular vesicular exosome;fascia adherens;intracellular membrane-bounded organelle…	24	24	24	12.1	12.1	12.1	282.83	0	44.27	3263800000	32	A0A0D9SF54;A0A0D9SGF6;Q13813-3;Q13813;Q13813-2;tr|A0A1U8CL70|A0A1U8CL70_MESAU;tr|A0A1U8CNY5|A0A1U8CNY5_MESAU;tr|A0A1U8CY20|A0A1U8CY20_MESAU;tr|A0A1U7R454|A0A1U7R454_MESAU;A0A0D9SFF6;A0A1B0GTB7;A0A1B0GUH3	A0A0D9SF54;A0A0D9SGF6;Q13813-3;Q13813;Q13813-2;tr|A0A1U8CL70|A0A1U8CL70_MESAU;tr|A0A1U8CNY5|A0A1U8CNY5_MESAU;tr|A0A1U8CY20|A0A1U8CY20_MESAU;tr|A0A1U7R454|A0A1U7R454_MESAU	Spectrin alpha chain, non-erythrocytic 1	SPTAN1
11787000	22569000	61695000	3059100	22461000	99992000	12313000	31224000				Homo sapiens	biological regulation;biosynthetic process;canonical Wnt receptor signaling pathway;catabolic process;cell surface receptor linked signaling pathway;cellular biosynthetic process;cellular catabolic process;cellular component organization;cellular component organization at cellular level;cellular component organization or biogenesis;cellular component organization or biogenesis at cellular level;c…	beta-catenin binding;binding;DNA binding;histone binding;nucleic acid binding;protein binding;protein binding transcription factor activity;protein N-terminus binding;regulatory region DNA binding;regulatory region nucleic acid binding;transcription cofactor activity;transcription corepressor activity;transcription factor binding transcription factor activity;transcription regulatory region DNA b…	cell part;cytoskeletal part;intracellular membrane-bounded organelle;intracellular organelle;intracellular organelle part;intracellular part;macromolecular complex;membrane-bounded organelle;microtubule;nuclear part;nucleoplasm;nucleoplasm part;nucleus;organelle;organelle part;protein complex;spindle microtubule;transcriptional repressor complex	8	8	8	20.7	20.7	20.7	51.556	0	323.31	5436300000	31	A0A0D9SF63;Q9BZK7;tr|A0A1U7R4X6|A0A1U7R4X6_MESAU;A0A1B0GVH3;A0A1B0GUU2;F8W9D8;C9IYU9;tr|A0A1U8C7W7|A0A1U8C7W7_MESAU;tr|A0A1U8C4X7|A0A1U8C4X7_MESAU;Q9BQ87;O60907-2;O60907;C9JLJ1;C9JCK0;C9JBN1;A0A0D9SF25;C9JCW4;C9JTW8;C9JY82;C9JEC9;C9J3H2;C9J903;A0A0D9SEW5;A0A0D9SFS8;C9J7E1	A0A0D9SF63;Q9BZK7;tr|A0A1U7R4X6|A0A1U7R4X6_MESAU;A0A1B0GVH3	F-box-like/WD repeat-containing protein TBL1XR1	TBL1XR1
0	0	0	0	0	0	0	6012900				Homo sapiens	anatomical structure development;anatomical structure morphogenesis;biological regulation;cell differentiation;cellular developmental process;cellular process;developmental process;muscle organ development;muscle structure development;negative regulation of biological process;negative regulation of cell cycle;negative regulation of cell cycle process;negative regulation of cell growth;negative re…	binding;cation binding;ion binding;ion channel binding;metal ion binding;protein binding;transition metal ion binding;zinc ion binding	adherens junction;anchoring junction;cell junction;cell part;cell-substrate adherens junction;cell-substrate junction;cytoplasm;cytoplasmic part;cytosol;focal adhesion;intracellular membrane-bounded organelle;intracellular organelle;intracellular part;membrane;membrane-bounded organelle;nucleus;organelle;plasma membrane	1	1	1	9.2	9.2	9.2	15.015	0	6.2095	994690000	27	A0A0D9SG53;A0A0D9SGB2;Q5JXI0;A0A0D9SFI6;A0A0D9SFB0;Q5JXH9;A0A0D9SFZ9;Q5JXH8;Q5JXH7;Q5JXI3;Q5JXI2;Q5JXI8;tr|A0A1U7R2T5|A0A1U7R2T5_MESAU;tr|A0A1U8CJ95|A0A1U8CJ95_MESAU;tr|A0A1U7RAC4|A0A1U7RAC4_MESAU;Q13642-3;Q13642-1;Q13642-5;Q13642-4;Q13642	A0A0D9SG53;A0A0D9SGB2;Q5JXI0;A0A0D9SFI6;A0A0D9SFB0;Q5JXH9;A0A0D9SFZ9;Q5JXH8;Q5JXH7;Q5JXI3;Q5JXI2;Q5JXI8;tr|A0A1U7R2T5|A0A1U7R2T5_MESAU;tr|A0A1U8CJ95|A0A1U8CJ95_MESAU;tr|A0A1U7RAC4|A0A1U7RAC4_MESAU;Q13642-3;Q13642-1;Q13642-5;Q13642-4;Q13642	Four and a half LIM domains protein 1	FHL1
878290	0	0	0	0	1321500	0	0				Homo sapiens	axon guidance;biological regulation;cell surface receptor linked signaling pathway;cellular component organization;cellular component organization at cellular level;cellular component organization or biogenesis;cellular component organization or biogenesis at cellular level;cellular macromolecule metabolic process;cellular membrane organization;cellular metabolic process;cellular process;cellular…	binding;catalytic activity;enzyme binding;GTP binding;GTPase activity;guanyl nucleotide binding;guanyl ribonucleotide binding;hydrolase activity;hydrolase activity, acting on acid anhydrides;hydrolase activity, acting on acid anhydrides, in phosphorus-containing anhydrides;identical protein binding;kinase binding;nucleoside-triphosphatase activity;nucleotide binding;protein binding;protein kinase…	cell part;cytoplasmic part;cytoskeletal part;extracellular membrane-bounded organelle;extracellular organelle;extracellular region part;extracellular vesicular exosome;intracellular organelle part;intracellular part;macromolecular complex;membrane;membrane coat;membrane part;membrane-bounded organelle;membrane-bounded vesicle;microtubule;organelle;organelle part;plasma membrane;protein complex;ve…	9	2	2	15	6.8	6.8	94.016	0.0057587	2.3387	1980300000	2	A0A0D9SFB1;A0A0U1RQP1;A0A0D9SFE4;Q05193-5;Q05193-3;Q05193-2;Q05193;A0A1B0GU67;tr|A0A1U8CR00|A0A1U8CR00_MESAU;A0A1B0GUX5	A0A0D9SFB1;A0A0U1RQP1;A0A0D9SFE4;Q05193-5;Q05193-3;Q05193-2;Q05193;A0A1B0GU67;tr|A0A1U8CR00|A0A1U8CR00_MESAU;A0A1B0GUX5	Dynamin-1	DNM1
5694700	9228200	4864100	11286000	5239300	11540000	6584000	6874700				Homo sapiens	actin cytoskeleton organization;actin filament-based process;actomyosin structure organization;asymmetric Golgi ribbon formation;biological regulation;cell migration;cell motility;cellular component movement;cellular component organization;cellular component organization at cellular level;cellular component organization or biogenesis;cellular component organization or biogenesis at cellular level…	actin binding;actin filament binding;adenyl nucleotide binding;adenyl ribonucleotide binding;ADP binding;ATP binding;binding;catalytic activity;cytoskeletal protein binding;DNA binding;hydrolase activity;hydrolase activity, acting on acid anhydrides;hydrolase activity, acting on acid anhydrides, in phosphorus-containing anhydrides;motor activity;nucleic acid binding;nucleoside-triphosphatase acti…	actomyosin;cell part;cytoplasmic part;cytoskeletal part;endoplasmic reticulum-Golgi intermediate compartment;Golgi apparatus part;Golgi membrane;intracellular membrane-bounded organelle;intracellular organelle;intracellular organelle part;intracellular part;macromolecular complex;membrane;membrane-bounded organelle;myosin complex;organelle;organelle membrane;organelle part;protein complex;trans-G…	24	24	24	15.7	15.7	15.7	231.1	0	323.31	26195000000	100	A0A0D9SFK2;Q92614-2;Q92614-3;Q92614-4;Q92614;Q92614-5;tr|A0A1U8CDA5|A0A1U8CDA5_MESAU;tr|A0A1U7QQH0|A0A1U7QQH0_MESAU;tr|A0A1U8C5U9|A0A1U8C5U9_MESAU;tr|A0A1U7R0P6|A0A1U7R0P6_MESAU;tr|A0A1U8C2U2|A0A1U8C2U2_MESAU;tr|A0A1U8C2T6|A0A1U8C2T6_MESAU;tr|A0A1U8C5U3|A0A1U8C5U3_MESAU;tr|A0A1U8CDX8|A0A1U8CDX8_MESAU;tr|A0A1U8CDX3|A0A1U8CDX3_MESAU;tr|A0A1U8C2T9|A0A1U8C2T9_MESAU;tr|A0A1U8CDA0|A0A1U8CDA0_MESAU;tr|A…	A0A0D9SFK2;Q92614-2;Q92614-3;Q92614-4;Q92614;Q92614-5;tr|A0A1U8CDA5|A0A1U8CDA5_MESAU;tr|A0A1U7QQH0|A0A1U7QQH0_MESAU;tr|A0A1U8C5U9|A0A1U8C5U9_MESAU;tr|A0A1U7R0P6|A0A1U7R0P6_MESAU;tr|A0A1U8C2U2|A0A1U8C2U2_MESAU;tr|A0A1U8C2T6|A0A1U8C2T6_MESAU;tr|A0A1U8C5U3|A0A1U8C5U3_MESAU;tr|A0A1U8CDX8|A0A1U8CDX8_MESAU;tr|A0A1U8CDX3|A0A1U8CDX3_MESAU;tr|A0A1U8C2T9|A0A1U8C2T9_MESAU;tr|A0A1U8CDA0|A0A1U8CDA0_MESAU;tr|A…	Unconventional myosin-XVIIIa	MYO18A
6838400	0	0	0	0	6851700	3232600	0				Homo sapiens	anatomical structure development;cell differentiation;cellular developmental process;cellular process;developmental process;establishment of localization;establishment of localization in cell;intracellular transport;mitochondrial transport;nervous system development;system development;transport	binding;cytoskeletal protein binding;kinesin binding;protein binding	cell part;cytoplasmic part;cytoskeleton;intracellular membrane-bounded organelle;intracellular non-membrane-bounded organelle;intracellular organelle;intracellular part;membrane-bounded organelle;mitochondrion;non-membrane-bounded organelle;organelle	1	1	1	7.7	7.7	7.7	20.056	0.0096739	2.0491	135380000	2	A0A1B0GV79;A0A1B0GW21;A0A1B0GTE6;A0A0D9SFK7;A0A1B0GUH6;A0A1B0GUA3;Q96EK5	A0A1B0GV79;A0A1B0GW21;A0A1B0GTE6;A0A0D9SFK7;A0A1B0GUH6;A0A1B0GUA3;Q96EK5	KIF1-binding protein	KIF1BP;KIAA1279
1735800	1462800	1548600	761830	1892800	2301400	1028600	1233100				Homo sapiens	cell projection organization;cellular component organization;cellular component organization at cellular level;cellular component organization or biogenesis;cellular component organization or biogenesis at cellular level;cellular process;neuron projection development	enzyme activator activity;enzyme regulator activity;GTPase activator activity;GTPase regulator activity;nucleoside-triphosphatase regulator activity	axon part;cell part;cell projection part;cytoplasm;intracellular part;neuromuscular junction;synapse;synapse part;terminal button	1	1	1	4.4	4.4	4.4	38.37	0.0078387	2.1496	203340000	6	A0A0D9SFR5;H3BQ06;H3BNU1;tr|A0A1U8CP25|A0A1U8CP25_MESAU;tr|A0A1U8CN59|A0A1U8CN59_MESAU;Q9ULP9-2;Q9ULP9	A0A0D9SFR5;H3BQ06;H3BNU1;tr|A0A1U8CP25|A0A1U8CP25_MESAU;tr|A0A1U8CN59|A0A1U8CN59_MESAU;Q9ULP9-2;Q9ULP9	TBC1 domain family member 24	TBC1D24
0	744470	658810	0	0	891030	0	1173300				Homo sapiens	2-oxoglutarate metabolic process;acetyl-CoA catabolic process;acetyl-CoA metabolic process;alcohol catabolic process;alcohol metabolic process;amine catabolic process;amine metabolic process;anatomical structure development;aspartate family amino acid catabolic process;aspartate family amino acid metabolic process;carbohydrate catabolic process;carbohydrate metabolic process;carboxylic acid catab…	binding;catalytic activity;cation binding;coenzyme binding;cofactor binding;ion binding;metal ion binding;oxidoreductase activity;oxidoreductase activity, acting on the aldehyde or oxo group of donors;oxidoreductase activity, acting on the aldehyde or oxo group of donors, disulfide as acceptor;oxidoreductase activity, acting on the aldehyde or oxo group of donors, NAD or NADP as acceptor;oxogluta…	cell part;cytoplasmic part;intracellular membrane-bounded organelle;intracellular organelle;intracellular organelle lumen;intracellular organelle part;intracellular part;macromolecular complex;membrane;membrane-bounded organelle;membrane-enclosed lumen;mitochondrial matrix;mitochondrial membrane;mitochondrial part;mitochondrion;organelle;organelle lumen;organelle membrane;organelle part;oxoglutar…	4	4	3	5.2	5.2	3.9	113.31	0	6.6409	247900000	7	A0A0D9SFS3;E9PDF2;E9PCR7;Q02218-2;Q02218;C9J4G7;E9PFG7;tr|A0A1U7QVD1|A0A1U7QVD1_MESAU;tr|A0A1U7R630|A0A1U7R630_MESAU;tr|A0A1U7RGH4|A0A1U7RGH4_MESAU;tr|A0A1U7R3L6|A0A1U7R3L6_MESAU;Q02218-3;Q9ULD0;Q9ULD0-3;Q9ULD0-2	A0A0D9SFS3;E9PDF2;E9PCR7;Q02218-2;Q02218;C9J4G7;E9PFG7;tr|A0A1U7QVD1|A0A1U7QVD1_MESAU;tr|A0A1U7R630|A0A1U7R630_MESAU;tr|A0A1U7RGH4|A0A1U7RGH4_MESAU;tr|A0A1U7R3L6|A0A1U7R3L6_MESAU;Q02218-3;Q9ULD0	2-oxoglutarate dehydrogenase, mitochondrial;2-oxoglutarate dehydrogenase-like, mitochondrial	OGDH;OGDHL
10115000	5352800	6001200	13122000	9357800	9679400	14025000	5718800				Homo sapiens	activation of immune response;antigen receptor-mediated signaling pathway;biological regulation;blood coagulation;cell activation;cell surface receptor linked signaling pathway;cellular process;cellular response to stimulus;coagulation;cytokine secretion;defense response;enzyme linked receptor protein signaling pathway;establishment of localization;establishment of localization in cell;establishm…		cell junction;cell part;cell-cell junction;cytoplasmic part;cytosol;intracellular part	9	9	9	18	18	18	60.143	0	16.856	2246700000	19	A0A0D9SGG1;Q13094;E7ESF6;tr|A0A1U7Q7Q3|A0A1U7Q7Q3_MESAU;E5RKA2	A0A0D9SGG1;Q13094;E7ESF6	Lymphocyte cytosolic protein 2	LCP2
87321000	93141000	80995000	32784000	89649000	183370000	53677000	81633000				Homo sapiens	actin cytoskeleton organization;actin filament organization;actin filament polymerization;actin filament-based process;actin polymerization or depolymerization;biological regulation;cell projection organization;cellular component assembly;cellular component assembly at cellular level;cellular component organization;cellular component organization at cellular level;cellular component organization …	binding;ion channel binding;protein binding;receptor binding	cell part;cell projection;cell projection membrane;cell projection part;cytoplasmic part;cytoskeletal part;cytosol;intracellular non-membrane-bounded organelle;intracellular organelle;intracellular organelle part;intracellular part;leading edge membrane;membrane part;mitotic spindle;neuron projection;non-membrane-bounded organelle;organelle;organelle part;plasma membrane part;ruffle membrane;spin…	45	45	45	40	40	40	141.36	0	323.31	45421000000	315	A0A0G2JH68;O60610;A0A140T8Z0;O60610-2;O60610-3;H9KV28;tr|A0A1U7QC57|A0A1U7QC57_MESAU;tr|A0A1U7Q518|A0A1U7Q518_MESAU;B4E2I7;E5RJ79	A0A0G2JH68;O60610;A0A140T8Z0;O60610-2;O60610-3;H9KV28;tr|A0A1U7QC57|A0A1U7QC57_MESAU;tr|A0A1U7Q518|A0A1U7Q518_MESAU	Protein diaphanous homolog 1	DIAPH1
1209600	2276500	2774100	2341500	4432900	4557900	2525600	1182700				Homo sapiens			cell part;cytoplasm;cytoskeleton;intracellular non-membrane-bounded organelle;intracellular organelle;intracellular part;non-membrane-bounded organelle;organelle	5	5	5	13.9	13.9	13.9	68.041	0	34.451	1042000000	11	A0A0G2JHC2;Q6NYC8;Q6NYC8-2;Q6NYC8-3	A0A0G2JHC2;Q6NYC8;Q6NYC8-2	Phostensin	PPP1R18
192580000	96842000	148950000	34571000	190440000	232090000	62954000	100550000				Homo sapiens				28	22	9	53.4	46.1	18.2	70.108	0	323.31	42309000000	296	A0A0G2JIW1;P0DMV9;P0DMV8;P0DMV8-2;V9GZ37;sp|P86237|HS71L_MESAU	A0A0G2JIW1;P0DMV9;P0DMV8;P0DMV8-2;V9GZ37	Heat shock 70 kDa protein 1B;Heat shock 70 kDa protein 1A	HSPA1B;HSPA1A
2261800	12839000	18662000	943490	15796000	11460000	950640	7283900				Homo sapiens	alcohol biosynthetic process;alcohol metabolic process;amine metabolic process;anatomical structure morphogenesis;biological regulation;biosynthetic process;carbohydrate metabolic process;catabolic process;cellular biosynthetic process;cellular catabolic process;cellular lipid catabolic process;cellular lipid metabolic process;cellular metabolic process;cellular nitrogen compound biosynthetic pro…	binding;catalytic activity;ceramidase activity;glucosylceramidase activity;hydrolase activity;hydrolase activity, acting on carbon-nitrogen (but not peptide) bonds;hydrolase activity, acting on carbon-nitrogen (but not peptide) bonds, in linear amides;hydrolase activity, acting on glycosyl bonds;hydrolase activity, hydrolyzing O-glycosyl compounds;protein binding;receptor binding	cell part;cytoplasmic part;extracellular membrane-bounded organelle;extracellular organelle;extracellular region part;extracellular vesicular exosome;intracellular organelle lumen;intracellular organelle part;intracellular part;lysosomal lumen;lysosomal membrane;membrane;membrane-bounded organelle;membrane-bounded vesicle;membrane-enclosed lumen;organelle;organelle lumen;organelle membrane;organe…	7	7	6	15.4	15.4	13.8	50.263	0	12.181	2533700000	12	A0A0G2JNZ5;A0A0G2JLB3;P04062-4;P04062-2;P04062;A0A0G2JNZ0;P04062-5;P04062-3	A0A0G2JNZ5;A0A0G2JLB3;P04062-4;P04062-2;P04062;A0A0G2JNZ0;P04062-5;P04062-3	Glucosylceramidase	GBA
0	0	7248100	0	12121000	5482200	0	0				Homo sapiens	anatomical structure morphogenesis;biological regulation;biosynthetic process;cell part morphogenesis;cellular biosynthetic process;cellular component morphogenesis;cellular component organization;cellular component organization at cellular level;cellular component organization or biogenesis;cellular component organization or biogenesis at cellular level;cellular developmental process;cellular ma…	binding;chromatin binding;DNA binding;nucleic acid binding;single-stranded DNA binding;structure-specific DNA binding	cell part;cytoplasmic part;extracellular membrane-bounded organelle;extracellular organelle;extracellular region part;extracellular vesicular exosome;intracellular membrane-bounded organelle;intracellular non-membrane-bounded organelle;intracellular organelle;intracellular organelle lumen;intracellular organelle part;intracellular part;membrane-bounded organelle;membrane-bounded vesicle;membrane-…	2	2	2	19.8	19.8	19.8	14.131	0.00035199	4.6428	341570000	3	C9K0U8;A0A0G2JLD8;E7EUY5;Q04837;tr|A0A1U8CLU8|A0A1U8CLU8_MESAU;tr|A0A1U7R4L2|A0A1U7R4L2_MESAU	C9K0U8;A0A0G2JLD8;E7EUY5;Q04837;tr|A0A1U8CLU8|A0A1U8CLU8_MESAU;tr|A0A1U7R4L2|A0A1U7R4L2_MESAU	Single-stranded DNA-binding protein, mitochondrial	SSBP1
0	0	4753400	0	0	0	0	0				Homo sapiens	anatomical structure homeostasis;antibacterial humoral response;antimicrobial humoral response;biological regulation;cellular component organization;cellular component organization or biogenesis;cellular membrane organization;cellular process;defense response;defense response to bacterium;endocytosis;establishment of localization;glomerular filtration;homeostatic process;humoral immune response;i…	antigen binding;binding	blood microparticle;dimeric IgA immunoglobulin complex;extracellular membrane-bounded organelle;extracellular organelle;extracellular region;extracellular region part;extracellular space;extracellular vesicular exosome;IgA immunoglobulin complex;IgA immunoglobulin complex, circulating;immunoglobulin complex;immunoglobulin complex, circulating;macromolecular complex;membrane-bounded organelle;memb…	6	1	1	22.9	4.4	4.4	36.508	0.002422	2.7724	899660000	1	A0A0G2JMB2;P01877	A0A0G2JMB2;P01877	Ig alpha-2 chain C region	IGHA2
0	0	5252700	0	0	0	0	0				Homo sapiens	defense response;defense response to bacterium;defense response to Gram-negative bacterium;multi-organism process;response to bacterium;response to biotic stimulus;response to other organism;response to stimulus;response to stress		extracellular region	3	3	2	13.9	13.9	13.9	30.99	0.00034471	4.3192	104720000	3	A0A0G2JPD0;A0A0G2JNB4;F5H7C1;Q04118	A0A0G2JPD0;A0A0G2JNB4;F5H7C1;Q04118	Basic salivary proline-rich protein 3	PRB3
5864800	1314300	6677400	542060	2781700	5200700	0	1389200				Homo sapiens	actin cytoskeleton organization;actin filament-based process;anatomical structure development;anatomical structure morphogenesis;biological regulation;brain development;cell surface receptor linked signaling pathway;cellular component organization;cellular component organization at cellular level;cellular component organization or biogenesis;cellular component organization or biogenesis at cellul…	enzyme activator activity;enzyme regulator activity;GTPase activator activity;GTPase regulator activity;guanyl-nucleotide exchange factor activity;nucleoside-triphosphatase regulator activity;Ras guanyl-nucleotide exchange factor activity;Rho guanyl-nucleotide exchange factor activity;small GTPase regulator activity	cell part;cytoplasmic part;cytosol;intracellular;intracellular part;membrane;plasma membrane	5	5	4	8.4	8.4	7.1	88.857	0	10.144	1073800000	17	A0A0G2JQ41;tr|A0A1U8BLV4|A0A1U8BLV4_MESAU;A0A1C7CYZ0;tr|A0A1U8BV51|A0A1U8BV51_MESAU;tr|A0A1U8BUF3|A0A1U8BUF3_MESAU;Q12979-4;Q12979-2;Q12979;B7Z683;I3L1U8;I3L2P5;A0A0G2JQT5;A0A0G2JRJ1;I3L379;I3L4Y1;I3L3W0	A0A0G2JQ41;tr|A0A1U8BLV4|A0A1U8BLV4_MESAU;A0A1C7CYZ0;tr|A0A1U8BV51|A0A1U8BV51_MESAU;tr|A0A1U8BUF3|A0A1U8BUF3_MESAU;Q12979-4;Q12979-2;Q12979;B7Z683;I3L1U8	Active breakpoint cluster region-related protein	ABR
2060700	472760	2645200	0	2917900	3146500	1128300	0				Homo sapiens	antigen processing and presentation;antigen processing and presentation of exogenous antigen;antigen processing and presentation of exogenous peptide antigen;antigen processing and presentation of exogenous peptide antigen via MHC class I;antigen processing and presentation of exogenous peptide antigen via MHC class I, TAP-dependent;antigen processing and presentation of peptide antigen;antigen p…	binding;enzyme activator activity;enzyme regulator activity;lipid binding;phosphatidylinositol binding;phosphatidylinositol-3-phosphate binding;phospholipid binding;protein binding;protein dimerization activity;superoxide-generating NADPH oxidase activator activity	cell part;cytoplasmic membrane-bounded vesicle;cytoplasmic part;cytoplasmic vesicle;cytosol;endocytic vesicle;endosomal part;endosome membrane;intracellular membrane-bounded organelle;intracellular organelle;intracellular organelle part;intracellular part;lysosome;lytic vacuole;macromolecular complex;membrane;membrane part;membrane-bounded organelle;membrane-bounded vesicle;NADPH oxidase complex;…	3	3	3	11.7	11.7	11.7	34.348	0.00065189	3.5661	247430000	4	A0A0G2JR51;Q15080;B0QY04;A0A217FLJ2;Q15080-3	A0A0G2JR51;Q15080	Neutrophil cytosol factor 4	NCF4
8328300	2760000	5918800	1390400	5567000	9739400	2361800	4672500				Homo sapiens	biological regulation;biosynthetic process;cell cycle process;cell division;cellular biosynthetic process;cellular macromolecule biosynthetic process;cellular macromolecule metabolic process;cellular metabolic process;cellular nitrogen compound metabolic process;cellular process;cellular protein metabolic process;dephosphorylation;exit from mitosis;gene expression;macromolecule biosynthetic proce…	catalytic activity;CTD phosphatase activity;DNA-directed RNA polymerase activity;hydrolase activity;hydrolase activity, acting on ester bonds;nucleotidyltransferase activity;phosphatase activity;phosphoprotein phosphatase activity;phosphoric ester hydrolase activity;protein serine/threonine phosphatase activity;RNA polymerase activity;transferase activity;transferase activity, transferring phosph…	actin cytoskeleton;cell part;centrosome;cytoplasm;cytoplasmic part;cytoskeletal part;cytoskeleton;intracellular membrane-bounded organelle;intracellular non-membrane-bounded organelle;intracellular organelle;intracellular organelle part;intracellular part;membrane-bounded organelle;microtubule organizing center;midbody;non-membrane-bounded organelle;nuclear part;nucleoplasm;nucleus;organelle;orga…	8	8	5	11.8	11.8	8.3	87.191	0	15.85	1700600000	19	A0A0J9YWB6;Q9Y5B0-4;Q9Y5B0;A0A0J9YWJ4;K7EJD2;A0A0A0MR03	A0A0J9YWB6;Q9Y5B0-4;Q9Y5B0;A0A0J9YWJ4;K7EJD2;A0A0A0MR03	RNA polymerase II subunit A C-terminal domain phosphatase	CTDP1
9909100	0	0	0	6204000	0	0	0				Homo sapiens	actin cytoskeleton organization;actin filament-based process;anatomical structure development;biological adhesion;biological regulation;cell adhesion;cell differentiation;cell differentiation involved in embryonic placenta development;cell-cell adhesion;cellular component organization;cellular component organization at cellular level;cellular component organization or biogenesis;cellular componen…	ATPase activator activity;ATPase regulator activity;binding;chaperone binding;DNA binding;enzyme activator activity;enzyme regulator activity;heat shock protein binding;nucleic acid binding;nucleoside-triphosphatase regulator activity;protein binding;unfolded protein binding	cell part;contractile fiber part;cytoplasm;cytoplasmic part;cytosol;extracellular membrane-bounded organelle;extracellular organelle;extracellular region part;extracellular vesicular exosome;intracellular membrane-bounded organelle;intracellular organelle;intracellular organelle part;intracellular part;membrane;membrane-bounded organelle;membrane-bounded vesicle;nuclear part;nucleoplasm;nucleus;o…	2	2	1	42.4	42.4	22.7	7.8818	0.00035842	4.9756	942460000	29	C9JB42;C9JDR7;C9JDX6;F8WCZ4;C9J2P2;E9PH18;C9J2C4;A0A0J9YX62;Q8WWF6;O75190-2;O75190-3;O75190;C9JN01;tr|A0A1U7Q3Y7|A0A1U7Q3Y7_MESAU;Q7Z6W7	C9JB42;C9JDR7;C9JDX6;F8WCZ4;C9J2P2;E9PH18;C9J2C4;A0A0J9YX62;Q8WWF6;O75190-2;O75190-3;O75190;C9JN01;tr|A0A1U7Q3Y7|A0A1U7Q3Y7_MESAU;Q7Z6W7	DnaJ homolog subfamily B member 3;DnaJ homolog subfamily B member 6;DnaJ homolog subfamily B member 7	DNAJB6;DNAJB3;DNAJB7
5402600	10506000	13257000	0	17472000	20427000	1310000	10962000				Homo sapiens	biological regulation;cellular component assembly;cellular component assembly at cellular level;cellular component organization;cellular component organization at cellular level;cellular component organization or biogenesis;cellular component organization or biogenesis at cellular level;cellular macromolecular complex assembly;cellular macromolecular complex subunit organization;cellular macromol…	binding;nucleic acid binding;nucleotide binding;RNA binding	cell part;cytoplasm;intracellular membrane-bounded organelle;intracellular organelle;intracellular part;membrane-bounded organelle;nucleus;organelle	3	3	3	8.4	8.4	8.4	46.621	0	47.472	1408600000	17	V9GYD9;Q5VZZ6;A0A0J9YX66;A0A1B0GU44;E9PC62;A0A1B0GUN8;A0A0J9YXJ0;O95319-5;O95319-2;O95319;O95319-4;O95319-3;V9GY47;A0A0J9YXK1;tr|A0A1U8CED8|A0A1U8CED8_MESAU	V9GYD9;Q5VZZ6;A0A0J9YX66;A0A1B0GU44;E9PC62;A0A1B0GUN8;A0A0J9YXJ0;O95319-5;O95319-2;O95319;O95319-4;O95319-3;V9GY47;A0A0J9YXK1	CUGBP Elav-like family member 2	CELF2
16331000	0	0	0	0	0	0	0				Homo sapiens	aging;biological regulation;cell aging;cell junction assembly;cell junction organization;cellular component assembly;cellular component assembly at cellular level;cellular component organization;cellular component organization at cellular level;cellular component organization or biogenesis;cellular component organization or biogenesis at cellular level;cellular process;cellular response to chemic…	binding;cation binding;enzyme binding;ion binding;kinase binding;metal ion binding;protein binding;protein kinase binding;transition metal ion binding;zinc ion binding	adherens junction;anchoring junction;cell junction;cell part;cell-cell junction;cell-substrate adherens junction;cell-substrate junction;cytoplasmic part;cytosol;focal adhesion;intracellular part;membrane;perinuclear region of cytoplasm;plasma membrane	1	1	1	5.7	5.7	5.7	24.307	0.004939	2.411	882800000	6	A0A0M3HER1;tr|A0A1U8BPX1|A0A1U8BPX1_MESAU;tr|A0A1U7QF22|A0A1U7QF22_MESAU;tr|A0A1U8BPL5|A0A1U8BPL5_MESAU;A0A0J9YXC7;P48059;P48059-4;P48059-2;P48059-5;P48059-3	A0A0M3HER1;tr|A0A1U8BPX1|A0A1U8BPX1_MESAU;tr|A0A1U7QF22|A0A1U7QF22_MESAU;tr|A0A1U8BPL5|A0A1U8BPL5_MESAU;A0A0J9YXC7;P48059;P48059-4;P48059-2;P48059-5;P48059-3	LIM and senescent cell antigen-like-containing domain protein 1	LIMS1
8980500	44903000	48042000	239860	49007000	30669000	702580	122800000				Homo sapiens	biological regulation;posttranscriptional regulation of gene expression;regulation of biological process;regulation of gene expression;regulation of macromolecule metabolic process;regulation of metabolic process	binding;cation binding;ion binding;metal ion binding;nucleic acid binding;nucleotide binding;structural molecule activity;transition metal ion binding;zinc ion binding	cell part;intracellular organelle part;intracellular part;membrane;nuclear inner membrane;nuclear matrix;nuclear membrane;nuclear part;nucleoplasm;organelle inner membrane;organelle membrane;organelle part	18	18	18	27.6	27.6	27.6	94.622	0	323.31	21486000000	205	A0A0R4J2E8;A8MXP9;P43243;D6REM6;tr|A0A1U8CW69|A0A1U8CW69_MESAU;tr|A0A1U8CV72|A0A1U8CV72_MESAU;D6R991;H0Y8T4;B3KM87;P43243-2;D6R8Z5;D6RBI2;D6RE02;D6RIA2;D6RB45;A0A1B0GX04;D6R9F3;D6RAM9;D6RAY2;D6RBS2;D6RCM3;D6REK4;D6RBK5;Q68E03	A0A0R4J2E8;A8MXP9;P43243;D6REM6;tr|A0A1U8CW69|A0A1U8CW69_MESAU;tr|A0A1U8CV72|A0A1U8CV72_MESAU;D6R991	Matrin-3	MATR3
0	0	0	0	6547900	0	0	0								8	1	1	36.6	6.5	6.5	26.3	0	15.147	45835000	3	A0A0U1RQL8	A0A0U1RQL8
12860000	0	0	0	0	5067600	0	0				Homo sapiens				2	2	2	44.3	44.3	44.3	8.6748	0.0019011	3.224	77171000	2	A0A0U1RQL9;A0A0U1RQS5;B3KNS4;A0A0U1RQV1;Q96A10;A0A0U1RQN3	A0A0U1RQL9;A0A0U1RQS5;B3KNS4;A0A0U1RQV1;Q96A10;A0A0U1RQN3		hCG_2043597
423750	213060	299180	0	207000	593920	0	0				Homo sapiens	biological regulation;cellular component organization;cellular component organization or biogenesis;cellular macromolecule metabolic process;cellular membrane organization;cellular metabolic process;cellular process;endocytosis;endosome to lysosome transport;endosome transport;establishment of localization;establishment of localization in cell;intracellular transport;lysosomal transport;macromole…	adenyl nucleotide binding;adenyl ribonucleotide binding;ATP binding;binding;catalytic activity;kinase activity;nucleotide binding;phosphotransferase activity, alcohol group as acceptor;protein binding;protein kinase activity;purine nucleotide binding;purine ribonucleoside triphosphate binding;purine ribonucleotide binding;receptor binding;ribonucleotide binding;transferase activity;transferase ac…	cell part;clathrin-coated vesicle;coated vesicle;cytoplasmic membrane-bounded vesicle;cytoplasmic part;cytoplasmic vesicle;endosomal part;endosome membrane;Golgi apparatus;intracellular membrane-bounded organelle;intracellular organelle;intracellular organelle part;intracellular part;membrane;membrane-bounded organelle;membrane-bounded vesicle;organelle;organelle membrane;organelle part;perinucle…	2	2	2	4	4	4	77.053	0.0032593	2.5637	72163000	4	F8VSC5;A0A0U1RQQ9;Q6P3W7;H0YIK6;tr|A0A1U8BJI9|A0A1U8BJI9_MESAU	F8VSC5;A0A0U1RQQ9;Q6P3W7;H0YIK6;tr|A0A1U8BJI9|A0A1U8BJI9_MESAU	SCY1-like protein 2	SCYL2
0	0	0	0	0	0	0	17984000				Homo sapiens	biological regulation;cellular component disassembly;cellular component disassembly at cellular level;cellular component organization;cellular component organization at cellular level;cellular component organization or biogenesis;cellular component organization or biogenesis at cellular level;cellular macromolecular complex disassembly;cellular macromolecular complex subunit organization;cellular…	binding;DNA binding;enzyme binding;nucleic acid binding;protein binding	cell part;chromosomal part;extracellular membrane-bounded organelle;extracellular organelle;extracellular region part;extracellular vesicular exosome;intracellular membrane-bounded organelle;intracellular organelle;intracellular organelle part;intracellular part;macromolecular complex;membrane-bounded organelle;membrane-bounded vesicle;nuclear chromosome part;nuclear nucleosome;nuclear part;nucle…	4	1	0	49.6	22.5	0	14.045	0	44.156	89918000	1	tr|A0A1U7QIH1|A0A1U7QIH1_MESAU;tr|A0A1U7R5Y7|A0A1U7R5Y7_MESAU;tr|A0A1U7Q479|A0A1U7Q479_MESAU;tr|A0A1U7R3G2|A0A1U7R3G2_MESAU;A0A0U1RR32;A0A0U1RRH7;Q99878;Q96KK5;Q9BTM1;Q93077;Q7L7L0;P20671;P0C0S8;P04908;H0YFX9;tr|A0A1U8CZ55|A0A1U8CZ55_MESAU;tr|A0A1U7QV80|A0A1U7QV80_MESAU;tr|A0A1U7QI01|A0A1U7QI01_MESAU;Q9BTM1-2;tr|A0A1U7R3H7|A0A1U7R3H7_MESAU;tr|A0A1U8CNQ3|A0A1U8CNQ3_MESAU;Q71UI9-5	tr|A0A1U7QIH1|A0A1U7QIH1_MESAU;tr|A0A1U7R5Y7|A0A1U7R5Y7_MESAU;tr|A0A1U7Q479|A0A1U7Q479_MESAU;tr|A0A1U7R3G2|A0A1U7R3G2_MESAU;A0A0U1RR32;A0A0U1RRH7;Q99878;Q96KK5;Q9BTM1;Q93077;Q7L7L0;P20671;P0C0S8;P04908;H0YFX9;tr|A0A1U8CZ55|A0A1U8CZ55_MESAU;tr|A0A1U7QV80|A0A1U7QV80_MESAU;tr|A0A1U7QI01|A0A1U7QI01_MESAU;Q9BTM1-2;tr|A0A1U7R3H7|A0A1U7R3H7_MESAU	Histone H2A type 1-J;Histone H2A type 1-H;Histone H2A.J;Histone H2A type 1-C;Histone H2A type 3;Histone H2A type 1-D;Histone H2A type 1;Histone H2A type 1-B/E;Histone H2A	HIST1H2AJ;HIST1H2AH;H2AFJ;HIST1H2AC;HIST3H2A;HIST1H2AD;HIST1H2AG;HIST1H2AB
0	0	0	0	0	0	0	0				Homo sapiens	cellular process;establishment of localization;establishment of protein localization;membrane docking;protein transport;transport;vesicle docking;vesicle docking involved in exocytosis		cell cortex part;cell part;cytoplasmic part;exocyst;intracellular part;macromolecular complex;protein complex	2	2	2	3.3	3.3	3.3	90.713	0.0032506	2.5453	198050000	4	tr|A0A1U7QFE6|A0A1U7QFE6_MESAU;A0A0U1RRB6;Q9Y2D4;J3QT38;Q9Y2D4-2	tr|A0A1U7QFE6|A0A1U7QFE6_MESAU;A0A0U1RRB6;Q9Y2D4;J3QT38;Q9Y2D4-2	Exocyst complex component 6B	EXOC6B
0	0	1230500	0	0	0	0	0				Homo sapiens	biological regulation;biosynthetic process;cell differentiation;cellular biosynthetic process;cellular developmental process;cellular macromolecule biosynthetic process;cellular macromolecule metabolic process;cellular metabolic process;cellular nitrogen compound metabolic process;cellular process;developmental process;macromolecule biosynthetic process;macromolecule metabolic process;metabolic p…	binding;core promoter proximal region DNA binding;core promoter proximal region sequence-specific DNA binding;DNA binding;nucleic acid binding;nucleic acid binding transcription factor activity;regulatory region DNA binding;regulatory region nucleic acid binding;RNA polymerase II core promoter proximal region sequence-specific DNA binding;RNA polymerase II core promoter proximal region sequence-s…	cell part;intracellular membrane-bounded organelle;intracellular organelle;intracellular organelle part;intracellular part;membrane-bounded organelle;nuclear part;nucleoplasm;nucleus;organelle;organelle part	1	1	1	3.1	3.1	3.1	63.854	0.0096632	2.0438	15997000	1	tr|A0A1U8C141|A0A1U8C141_MESAU;tr|A0A1U8BTR7|A0A1U8BTR7_MESAU;A0A0U1RRL5;P32519-2;P32519	tr|A0A1U8C141|A0A1U8C141_MESAU;tr|A0A1U8BTR7|A0A1U8BTR7_MESAU;A0A0U1RRL5;P32519-2;P32519	ETS-related transcription factor Elf-1	ELF1
325920	622890	932570	0	3103300	1659300	0	1446000				Homo sapiens	ATP-dependent chromatin remodeling;biosynthetic process;cellular biosynthetic process;cellular component organization;cellular component organization at cellular level;cellular component organization or biogenesis;cellular component organization or biogenesis at cellular level;cellular macromolecule biosynthetic process;cellular macromolecule metabolic process;cellular metabolic process;cellular …	binding;cation binding;DNA binding;ion binding;metal ion binding;nucleic acid binding;nucleic acid binding transcription factor activity;sequence-specific DNA binding;sequence-specific DNA binding transcription factor activity;transition metal ion binding;zinc ion binding	cell part;chromatin;chromosomal part;intracellular organelle part;intracellular part;macromolecular complex;nuclear body;nuclear chromatin;nuclear chromosome part;nuclear part;nuclear speck;nucleoplasm;nucleoplasm part;organelle part;protein complex	2	2	2	6.8	6.8	6.8	63.461	0.00034165	4.2061	226520000	5	A0A0U1RRM1;Q8WXI9;A0A0U1RRK3;A0A0U1RR34;tr|A0A1U8CCF3|A0A1U8CCF3_MESAU;tr|A0A1U7QJK1|A0A1U7QJK1_MESAU	A0A0U1RRM1;Q8WXI9;A0A0U1RRK3;A0A0U1RR34;tr|A0A1U8CCF3|A0A1U8CCF3_MESAU;tr|A0A1U7QJK1|A0A1U7QJK1_MESAU	Transcriptional repressor p66-beta	GATAD2B
153620000	117820000	150430000	13300000	194970000	267520000	15033000	137690000				Homo sapiens	alternative nuclear mRNA splicing, via spliceosome;biological regulation;cellular macromolecule metabolic process;cellular metabolic process;cellular nitrogen compound metabolic process;cellular process;gene expression;macromolecule metabolic process;metabolic process;mRNA metabolic process;mRNA processing;negative regulation of biological process;negative regulation of cell differentiation;negat…	binding;nucleic acid binding;nucleotide binding;poly-pyrimidine tract binding;pre-mRNA binding;RNA binding;single-stranded RNA binding	cell part;extracellular membrane-bounded organelle;extracellular organelle;extracellular region part;extracellular vesicular exosome;intracellular membrane-bounded organelle;intracellular non-membrane-bounded organelle;intracellular organelle;intracellular organelle part;intracellular part;membrane;membrane-bounded organelle;membrane-bounded vesicle;non-membrane-bounded organelle;nuclear part;nuc…	14	14	6	43.9	43.9	18	62.463	0	323.31	32426000000	256	A0A0U1RRM4;P26599;P26599-2;P26599-3;A6NLN1;A0A0D9SF20;K7EKJ7;K7EK45;A0A087WU68;K7ELW5;K7ES59;A0A087WUW5;X6R242;tr|A0A1U7RB77|A0A1U7RB77_MESAU;tr|A0A1U7R0R9|A0A1U7R0R9_MESAU;O95758-1;O95758-6;O95758-2;O95758;O95758-5;O95758-4	A0A0U1RRM4;P26599;P26599-2;P26599-3;A6NLN1	Polypyrimidine tract-binding protein 1	PTBP1
3867500	2987300	4577400	624920	5462900	6557400	762930	2678800				Homo sapiens	biological regulation;biosynthetic process;cellular biosynthetic process;cellular macromolecule biosynthetic process;cellular macromolecule metabolic process;cellular metabolic process;cellular nitrogen compound metabolic process;cellular process;gene expression;macromolecule biosynthetic process;macromolecule metabolic process;metabolic process;negative regulation of biological process;negative …		cell part;cytoplasm;intracellular organelle part;intracellular part;macromolecular complex;NELF complex;nuclear part;nucleoplasm;nucleoplasm part;organelle part;protein complex;transcription elongation factor complex	5	5	5	9.9	9.9	9.9	70.038	0	13.189	952810000	9	A0A0X1KG71;Q8WX92;tr|A0A1U7QYJ3|A0A1U7QYJ3_MESAU	A0A0X1KG71;Q8WX92;tr|A0A1U7QYJ3|A0A1U7QYJ3_MESAU	Negative elongation factor B	NELFB
1777100	2146400	3180400	0	9030600	6444600	432830	18692000				Homo sapiens	antibacterial humoral response;antigen processing and presentation;antigen processing and presentation of endogenous antigen;antigen processing and presentation of endogenous peptide antigen;antigen processing and presentation of endogenous peptide antigen via MHC class I;antigen processing and presentation of endogenous peptide antigen via MHC class I via ER pathway;antigen processing and presen…	antigen binding;beta-2-microglobulin binding;binding;peptide antigen binding;peptide binding;protein binding;protein complex binding;receptor binding;T cell receptor binding;TAP binding	cell part;cell surface;coated vesicle membrane;cytoplasmic part;cytoplasmic vesicle membrane;cytoplasmic vesicle part;early endosome membrane;endocytic vesicle membrane;endoplasmic reticulum;endoplasmic reticulum exit site;endoplasmic reticulum part;endosomal part;endosome membrane;ER to Golgi transport vesicle membrane;extracellular membrane-bounded organelle;extracellular organelle;extracellula…	7	7	4	31.4	31.4	14.4	34.288	0	11.353	1153700000	13	A0A140T955;A0A140T933;A0A1W2PPQ2;A0A1W2PRT9;A0A140T9I0;A0A140T9X5;A0A140T913;P10316;P01892;P30459;P30457;P30453;P16190;P16189;P01891;Q5SRN7;A0A140T975;A0A140T941;A0A140T8W8;A0A1W2PS24;A0A1W2PR61;A0A1W2PQS8;Q9GJ45;A0A1W2PS39;A0A1W2PPF8;A0A140T9Z6;B0UXQ0;Q5SRN5;A0A140T8Y4;A0A0G2JPD3;P16188;P13746;P04439;P30512;P30456;P30450;P18462;P10314;P13746-2;P30447;P05534;A0A0G2JI36;A0A1W2PQD0;A0A1W2PSE7;A0A0G…	A0A140T955;A0A140T933;A0A1W2PPQ2;A0A1W2PRT9;A0A140T9I0;A0A140T9X5;A0A140T913;P10316;P01892;P30459;P30457;P30453;P16190;P16189;P01891;Q5SRN7;A0A140T975;A0A140T941;A0A140T8W8;A0A1W2PS24;A0A1W2PR61;A0A1W2PQS8;Q9GJ45;A0A1W2PS39;A0A1W2PPF8;A0A140T9Z6;B0UXQ0;Q5SRN5;A0A140T8Y4;A0A0G2JPD3;P16188;P13746;P04439;P30512;P30456;P30450;P18462;P10314;P13746-2	HLA class I histocompatibility antigen, A-69 alpha chain;HLA class I histocompatibility antigen, A-2 alpha chain;HLA class I histocompatibility antigen, A-74 alpha chain;HLA class I histocompatibility antigen, A-66 alpha chain;HLA class I histocompatibility antigen, A-34 alpha chain;HLA class I histocompatibility antigen, A-33 alpha chain;HLA class I histocompatibility antigen, A-31 alpha chain;H…	HLA-A
0	1269300	0	0	2571100	0	621650	5483000				Homo sapiens	antigen processing and presentation;antigen processing and presentation of exogenous antigen;antigen processing and presentation of exogenous peptide antigen;antigen processing and presentation of exogenous peptide antigen via MHC class I;antigen processing and presentation of exogenous peptide antigen via MHC class I, TAP-dependent;antigen processing and presentation of exogenous peptide antigen…	antigen binding;binding;peptide antigen binding;peptide binding	cell part;cell surface;coated vesicle membrane;cytoplasmic part;cytoplasmic vesicle membrane;cytoplasmic vesicle part;early endosome membrane;endocytic vesicle membrane;endoplasmic reticulum;endoplasmic reticulum part;endosomal part;endosome membrane;ER to Golgi transport vesicle membrane;extracellular membrane-bounded organelle;extracellular organelle;extracellular region part;extracellular vesi…	4	1	1	16.9	4.4	4.4	40.71	0	29.513	176100000	2	O19617;A0A140T921;A2AEA2;A0A140T9H5;A0A140T9U8;P10321;A0A1W2PRU9	O19617;A0A140T921;A2AEA2;A0A140T9H5;A0A140T9U8;P10321;A0A1W2PRU9	HLA class I histocompatibility antigen, Cw-7 alpha chain	HLA-C
2136000	0	1440500	50328	0	0	96815	192360								27	9	0	58.3	20.9	0	49.43	0	323.31	17283000000	43	A0A140TA69	A0A140TA69
0	2654600	3981000	1587100	4979600	5405900	787710	1686900				Homo sapiens	adipose tissue development;anatomical structure development;biological regulation;cellular macromolecule metabolic process;cellular metabolic process;cellular nitrogen compound metabolic process;cellular process;demethylation;developmental process;DNA dealkylation;DNA dealkylation involved in DNA repair;DNA demethylation;DNA metabolic process;DNA modification;homeostatic process;macromolecule met…	binding;catalytic activity;cation binding;demethylase activity;DNA demethylase activity;DNA-N1-methyladenine dioxygenase activity;ferrous iron binding;ion binding;iron ion binding;metal ion binding;oxidative DNA demethylase activity;oxidative RNA demethylase activity;oxidoreductase activity;oxidoreductase activity, acting on paired donors, with incorporation or reduction of molecular oxygen;oxido…	cell part;intracellular membrane-bounded organelle;intracellular organelle;intracellular organelle part;intracellular part;membrane-bounded organelle;nuclear body;nuclear part;nuclear speck;nucleoplasm part;nucleus;organelle;organelle part	3	3	3	6.7	6.7	6.7	48.605	0.00034892	4.4762	505990000	8	A0A1B0GTY1;A0A1B0GUC3;A0A1B0GV98;A0A1B0GTC5;A0A1B0GU26;A0A1B0GTC3;A0A1B0GVH5;Q9C0B1;tr|A0A1U7QR98|A0A1U7QR98_MESAU	A0A1B0GTY1;A0A1B0GUC3;A0A1B0GV98;A0A1B0GTC5;A0A1B0GU26;A0A1B0GTC3;A0A1B0GVH5;Q9C0B1	Alpha-ketoglutarate-dependent dioxygenase FTO	FTO
4033800	0	0	1045000	2345100	4764300	2420000	0				Homo sapiens	apoptosis;biological regulation;cell death;cellular process;cellular response to stimulus;death;intracellular signal transduction;negative regulation of biological process;negative regulation of cell proliferation;negative regulation of cellular process;positive regulation of biological process;positive regulation of cellular metabolic process;positive regulation of cellular process;positive regu…	binding;cation binding;ion binding;metal ion binding	cell part;cytoplasm;cytoskeletal part;intracellular membrane-bounded organelle;intracellular organelle;intracellular organelle part;intracellular part;macromolecular complex;membrane-bounded organelle;microtubule;nucleus;organelle;organelle part;protein complex	2	2	2	11.9	11.9	11.9	20.905	0.0049176	2.3919	189910000	3	Q8TEK8;A0A1B0GTG4;Q8WWW0-2;Q8WWW0;A0A075B763;Q8WWW0-3	Q8TEK8;A0A1B0GTG4;Q8WWW0-2;Q8WWW0;A0A075B763;Q8WWW0-3	Ras association domain-containing protein 5	FLJ00186;RASSF5
69776000	34503000	45959000	25403000	52638000	88874000	44786000	32070000				Homo sapiens	aerobic respiration;AMP biosynthetic process;AMP metabolic process;biosynthetic process;cellular aromatic compound metabolic process;cellular biosynthetic process;cellular component assembly;cellular component organization;cellular component organization or biogenesis;cellular metabolic process;cellular nitrogen compound biosynthetic process;cellular nitrogen compound metabolic process;cellular p…	(S)-2-(5-amino-1-(5-phospho-D-ribosyl)imidazole-4-carboxamido)succinate AMP-lyase (fumarate-forming) activity;amidine-lyase activity;carbon-nitrogen lyase activity;catalytic activity;lyase activity;N6-(1,2-dicarboxyethyl)AMP AMP-lyase (fumarate-forming) activity	cell part;cytoplasmic part;cytosol;intracellular membrane-bounded organelle;intracellular organelle;intracellular part;membrane-bounded organelle;mitochondrion;organelle	13	13	13	40	40	40	54.465	0	319.75	10003000000	82	A0A1B0GWJ0;A0A1B0GTJ7;P30566;A0A0A6YY92;A0A096LNY6;P30566-2;A0A1B0GTG9;A0A1B0GWF8;A0A096LNY5;A0A096LPA2;tr|A0A1U7Q7U1|A0A1U7Q7U1_MESAU;A0A096LP92;A0A096LNY4;A0A096LP76;B4DEP1;A0A096LP72;V9GY96;A0A096LNT0;A0A1W2PRX2	A0A1B0GWJ0;A0A1B0GTJ7;P30566;A0A0A6YY92;A0A096LNY6;P30566-2;A0A1B0GTG9;A0A1B0GWF8	Adenylosuccinate lyase	ADSL
25571000	1370300	6133400	4623800	10678000	6690600	23022000	0				Homo sapiens				3	3	3	21.1	21.1	21.1	23.36	0	323.31	748170000	11	A0A1B0GTK8;Q5GJ75;tr|A0A1U7QN57|A0A1U7QN57_MESAU	A0A1B0GTK8;Q5GJ75	Tumor necrosis factor alpha-induced protein 8-like protein 3	TNFAIP8L3
11136000	50389000	58826000	3687600	76435000	66182000	2572200	49146000				Homo sapiens	anatomical structure development;cellular lipid metabolic process;cellular metabolic process;cellular process;ceramide metabolic process;developmental process;glycolipid metabolic process;glycosphingolipid metabolic process;lipid metabolic process;lung development;membrane lipid metabolic process;metabolic process;organ development;primary metabolic process;response to chemical stimulus;response …	catalytic activity;ceramidase activity;hydrolase activity;hydrolase activity, acting on carbon-nitrogen (but not peptide) bonds;hydrolase activity, acting on carbon-nitrogen (but not peptide) bonds, in linear amides	cell part;cytoplasmic part;extracellular membrane-bounded organelle;extracellular organelle;extracellular region part;extracellular vesicular exosome;intracellular organelle lumen;intracellular organelle part;intracellular part;lysosomal lumen;membrane-bounded organelle;membrane-bounded vesicle;membrane-enclosed lumen;organelle;organelle lumen;organelle part;vacuolar lumen;vacuolar part;vesicle	11	11	11	35.2	35.2	35.2	37.467	0	109.88	6968000000	44	A0A1B0GUE3;A0A1B0GUW4;A0A1B0GW68;A0A1B0GUA4;A0A1B0GTM3;A0A1B0GUH5;Q13510;Q13510-2;A0A1B0GTP7;E7EMM4;A0A1B0GTZ5;A0A1B0GUG1;Q13510-3;A0A1B0GV06;A0A1B0GW66;A0A1B0GUJ3;A0A1B0GVE7;A0A1B0GU62;A0A1B0GVG2;A0A1B0GVA3;A0A1B0GV95;A0A1B0GW48;A0A1B0GVJ1;A0A1B0GU06;A0A1B0GUB3;tr|A0A1U7QFT8|A0A1U7QFT8_MESAU	A0A1B0GUE3;A0A1B0GUW4;A0A1B0GW68;A0A1B0GUA4;A0A1B0GTM3;A0A1B0GUH5;Q13510;Q13510-2;A0A1B0GTP7;E7EMM4;A0A1B0GTZ5;A0A1B0GUG1;Q13510-3;A0A1B0GV06	Acid ceramidase;Acid ceramidase subunit alpha;Acid ceramidase subunit beta	ASAH1
25999000	4076000	5680400	1833400	6654000	23055000	8995100	1768500				Homo sapiens	activation of MAPK activity;anatomical structure morphogenesis;biological adhesion;biological regulation;branching morphogenesis of a tube;cell adhesion;cell junction assembly;cell junction organization;cell morphogenesis;cell morphogenesis involved in differentiation;cell projection assembly;cell projection organization;cell surface receptor linked signaling pathway;cell-matrix adhesion;cell-sub…	beta-catenin binding;binding;cation binding;cytoskeletal protein binding;ion binding;metal ion binding;protein binding;transition metal ion binding;vinculin binding;zinc ion binding	actin filament bundle;actomyosin;adherens junction;anchoring junction;cell cortex;cell junction;cell part;cell projection;cell-substrate adherens junction;cell-substrate junction;cytoplasm;cytoplasmic part;cytoskeletal part;cytoskeleton;cytosol;focal adhesion;intracellular non-membrane-bounded organelle;intracellular organelle;intracellular organelle part;intracellular part;lamellipodium;macromol…	10	10	10	12.9	12.9	12.9	115.9	0	323.31	6164400000	83	A0A1B0GTU4;P49023;F5GZ78;P49023-2;P49023-3;tr|A0A1U7QHG2|A0A1U7QHG2_MESAU;tr|A0A1U7QTV2|A0A1U7QTV2_MESAU;A0A1B0GU60;P49023-4;F5H836;A0A1B0GV30	A0A1B0GTU4;P49023;F5GZ78;P49023-2;P49023-3;tr|A0A1U7QHG2|A0A1U7QHG2_MESAU;tr|A0A1U7QTV2|A0A1U7QTV2_MESAU;A0A1B0GU60;P49023-4	Paxillin	PXN
1181800	0	917830	0	1017600	1164800	0	0				Homo sapiens	cellular component organization;cellular component organization at cellular level;cellular component organization or biogenesis;cellular component organization or biogenesis at cellular level;cellular membrane fusion;cellular membrane organization;cellular process;fertilization;immune system process;membrane fusion;membrane organization;organelle fusion;organelle organization;reproductive process…		cell part;chromosome;cytoplasmic part;cytoskeletal part;endoplasmic reticulum membrane;endoplasmic reticulum part;envelope;integral to endoplasmic reticulum membrane;integral to membrane;integral to organelle membrane;integral to plasma membrane;intracellular non-membrane-bounded organelle;intracellular organelle;intracellular organelle part;intracellular part;intrinsic to endoplasmic reticulum m…	1	1	1	5.2	5.2	5.2	38.995	0.0088716	2.067	98487000	1	F8W9L6;F5H006;A0A1B0GU45;Q12912-2;Q12912	F8W9L6;F5H006;A0A1B0GU45;Q12912-2;Q12912	Lymphoid-restricted membrane protein;Processed lymphoid-restricted membrane protein	LRMP
107310000	364009984	463889984	39728000	711369984	766369984	47181000	457100000				Homo sapiens	antigen processing and presentation;antigen processing and presentation of exogenous antigen;antigen processing and presentation of exogenous peptide antigen;antigen processing and presentation of exogenous peptide antigen via MHC class II;antigen processing and presentation of peptide antigen;antigen processing and presentation of peptide antigen via MHC class II;antigen processing and presentat…	aspartic-type endopeptidase activity;aspartic-type peptidase activity;catalytic activity;endopeptidase activity;hydrolase activity;peptidase activity;peptidase activity, acting on L-amino acid peptides	cell part;cytoplasmic membrane-bounded vesicle;cytoplasmic part;cytoplasmic vesicle;extracellular membrane-bounded organelle;extracellular organelle;extracellular region;extracellular region part;extracellular space;extracellular vesicular exosome;intracellular membrane-bounded organelle;intracellular organelle;intracellular organelle lumen;intracellular organelle part;intracellular part;lysosoma…	14	14	14	41.6	41.6	41.6	43.831	0	323.31	65947000000	264	A0A1B0GV23;A0A1B0GVD5;A0A1B0GWE8;P07339;A0A1B0GW44;A0A1B0GVP3;A0A1B0GU92;A0A1B0GU03;H7C469;F8WD96;C9JH19;H7C1V0;F8W787;tr|A0A1U7QBN0|A0A1U7QBN0_MESAU;A0A1B0GV01;A0A1B0GVF1	A0A1B0GV23;A0A1B0GVD5;A0A1B0GWE8;P07339;A0A1B0GW44;A0A1B0GVP3;A0A1B0GU92;A0A1B0GU03;H7C469;F8WD96;C9JH19	Cathepsin D;Cathepsin D light chain;Cathepsin D heavy chain	CTSD
2484200	3879400	3415800	1089500	3959200	2920500	1548100	2934100				Homo sapiens	anatomical structure development;androgen receptor signaling pathway;biological regulation;brain development;catabolic process;cellular catabolic process;cellular component organization;cellular component organization or biogenesis;cellular macromolecule catabolic process;cellular macromolecule metabolic process;cellular membrane organization;cellular metabolic process;cellular process;cellular p…	acid-amino acid ligase activity;binding;catalytic activity;cation binding;ion binding;ligase activity;ligase activity, forming carbon-nitrogen bonds;metal ion binding;protein binding transcription factor activity;small conjugating protein ligase activity;transcription coactivator activity;transcription cofactor activity;transcription factor binding transcription factor activity;ubiquitin-protein …	cell part;cytoplasm;cytoplasmic part;cytosol;intracellular membrane-bounded organelle;intracellular organelle;intracellular part;macromolecular complex;membrane-bounded organelle;nucleus;organelle;proteasome complex;protein complex	9	9	4	13.3	13.3	6.2	93.543	0	14.713	3171900000	19	A0A1B0GVL3;Q05086-2;Q05086-3;Q05086;A0A0D9SG77;A0A0D9SGI3;A0A0D9SF91;A0A0D9SG63;A0A0D9SES7;S4R306	A0A1B0GVL3;Q05086-2;Q05086-3;Q05086;A0A0D9SG77	Ubiquitin-protein ligase E3A	UBE3A
0	11042000	9579400	12537000	0	0	0	0				Homo sapiens	apoptosis;biological regulation;biosynthetic process;cell cycle arrest;cell cycle process;cell death;cellular biosynthetic process;cellular component organization;cellular component organization at cellular level;cellular component organization or biogenesis;cellular component organization or biogenesis at cellular level;cellular macromolecule biosynthetic process;cellular macromolecule metabolic…	binding;cation binding;chromatin binding;histone binding;ion binding;metal ion binding;methylated histone residue binding;protein binding;protein binding transcription factor activity;transcription coactivator activity;transcription cofactor activity;transcription factor binding transcription factor activity;transition metal ion binding;zinc ion binding	cell part;H3 histone acetyltransferase complex;histone acetyltransferase complex;intracellular membrane-bounded organelle;intracellular organelle;intracellular organelle part;intracellular part;macromolecular complex;membrane-bounded organelle;MOZ/MORF histone acetyltransferase complex;nuclear part;nucleoplasm;nucleoplasm part;nucleus;organelle;organelle part;protein complex	2	2	2	8.3	8.3	8.3	28.29	0.003819	2.5021	955440000	2	A0A1B0GW41;E9PEN0;tr|A0A1U7QMV3|A0A1U7QMV3_MESAU;Q9UNL4-8;Q9UNL4-3;Q8WYH8-2;Q8WYH8;Q9UNL4-4;Q9UNL4-7;Q9UNL4-5;Q9UNL4-6;Q9UNL4-2;Q9UNL4	A0A1B0GW41;E9PEN0;tr|A0A1U7QMV3|A0A1U7QMV3_MESAU;Q9UNL4-8;Q9UNL4-3;Q8WYH8-2;Q8WYH8;Q9UNL4-4;Q9UNL4-7;Q9UNL4-5;Q9UNL4-6;Q9UNL4-2;Q9UNL4	Inhibitor of growth protein 4;Inhibitor of growth protein 5	ING5;ING4
48562000	2027900	35577000	9718700	45652000	31117000	25022000	43462000				Homo sapiens	multicellular organismal process;neurological system process;sensory perception;sensory perception of mechanical stimulus;sensory perception of sound;system process			6	6	6	49.2	49.2	49.2	14.844	0	156.85	1688000000	19	C9J6N5;C9JQ40;C9JW51;A0A1C7CYX8;tr|A0A1U7R7U6|A0A1U7R7U6_MESAU;Q9H098;C9J3Q3;tr|A0A1U8CEH1|A0A1U8CEH1_MESAU;tr|A0A1U8CN33|A0A1U8CN33_MESAU;Q9H098-2;X6RET8;C9JP05;C9JYP1;C9J6Y8;F8WCJ2	C9J6N5;C9JQ40;C9JW51;A0A1C7CYX8;tr|A0A1U7R7U6|A0A1U7R7U6_MESAU;Q9H098;C9J3Q3;tr|A0A1U8CEH1|A0A1U8CEH1_MESAU;tr|A0A1U8CN33|A0A1U8CN33_MESAU;Q9H098-2;X6RET8;C9JP05	Protein FAM107B	FAM107B
473680000	209080000	336420000	153300000	357409984	609870016	281480000	231510000				Homo sapiens	anatomical structure development;axon guidance;biological regulation;cellular component organization;cellular component organization at cellular level;cellular component organization or biogenesis;cellular component organization or biogenesis at cellular level;cellular membrane organization;cellular metabolic process;cellular nitrogen compound metabolic process;cellular process;cellular response …	catalytic activity;dihydropyrimidinase activity;hydrolase activity;hydrolase activity, acting on carbon-nitrogen (but not peptide) bonds;hydrolase activity, acting on carbon-nitrogen (but not peptide) bonds, in cyclic amides	axon part;cell body;cell part;cell projection;cell projection part;cytoplasmic part;cytoskeleton;cytosol;dendrite;extracellular membrane-bounded organelle;extracellular organelle;extracellular region part;extracellular vesicular exosome;growth cone;intracellular membrane-bounded organelle;intracellular non-membrane-bounded organelle;intracellular organelle;intracellular part;macromolecular comple…	25	25	20	52.4	52.4	43	73.502	0	323.31	106250000000	401	A0A1C7CYX9;Q16555;tr|A0A1U7QXQ0|A0A1U7QXQ0_MESAU;Q16555-2;tr|A0A1U7QME0|A0A1U7QME0_MESAU;E5RFU4;D6RF19	A0A1C7CYX9;Q16555;tr|A0A1U7QXQ0|A0A1U7QXQ0_MESAU;Q16555-2;tr|A0A1U7QME0|A0A1U7QME0_MESAU	Dihydropyrimidinase-related protein 2	DPYSL2
181620000	52014000	69233000	45275000	64232000	73883000	87858000	18038000								13	13	3	20.3	20.3	4.5	75.872	0	323.31	20294000000	63	A0A1W2PNV4;E9PF58;tr|A0A1U8CBR4|A0A1U8CBR4_MESAU;Q92747;tr|A0A1U8BZN7|A0A1U8BZN7_MESAU;Q92747-2	A0A1W2PNV4
39985000	35377000	34070000	12659000	36995000	48507000	20970000	11962000				Homo sapiens	anatomical structure morphogenesis;biological regulation;biosynthetic process;cell fate commitment;cell proliferation;cell surface receptor linked signaling pathway;cellular biosynthetic process;cellular developmental process;cellular macromolecule biosynthetic process;cellular macromolecule metabolic process;cellular metabolic process;cellular nitrogen compound metabolic process;cellular process…	binding;core promoter binding;core promoter sequence-specific DNA binding;DNA binding;enzyme binding;identical protein binding;molecular transducer activity;nucleic acid binding;nucleic acid binding transcription factor activity;phosphatase binding;protein binding;protein phosphatase binding;regulatory region DNA binding;regulatory region nucleic acid binding;RNA polymerase II core promoter seque…	cell part;chromatin;chromosomal part;cytoplasm;cytoplasmic part;cytosol;intracellular organelle part;intracellular part;membrane part;membrane raft;nuclear chromatin;nuclear chromosome part;nuclear part;nucleoplasm;organelle part	10	10	10	15	15	15	76.077	0	17.663	7390800000	50	A0A1W2PNW1;P42226;P42226-3;P42226-2;G3V5I8;G3V370;G3V2X7;G3V5K5;tr|A0A1U7R2P6|A0A1U7R2P6_MESAU;G3V568;H0YJH6;Q5FBW6;G3V2L2;G3V2M3;G3V3E9;G3V2H4;H0YIY2	A0A1W2PNW1;P42226;P42226-3;P42226-2	Signal transducer and activator of transcription 6	STAT6
1684500	2883400	3228600	2317400	3586300	3880000	1443600	7667300				Homo sapiens	carboxylic acid metabolic process;cellular ketone metabolic process;cellular metabolic process;cellular process;dicarboxylic acid metabolic process;malate metabolic process;metabolic process;organic acid metabolic process;oxoacid metabolic process;small molecule metabolic process	binding;carbon-carbon lyase activity;carboxy-lyase activity;catalytic activity;cation binding;coenzyme binding;cofactor binding;electron carrier activity;ion binding;lyase activity;malate dehydrogenase (decarboxylating) activity;malate dehydrogenase activity;malic enzyme activity;metal ion binding;NAD binding;nucleotide binding;oxaloacetate decarboxylase activity;oxidoreductase activity;oxidoredu…	cell part;cytoplasmic part;intracellular membrane-bounded organelle;intracellular organelle;intracellular organelle lumen;intracellular organelle part;intracellular part;membrane-bounded organelle;membrane-enclosed lumen;mitochondrial matrix;mitochondrial part;mitochondrion;organelle;organelle lumen;organelle part	6	6	6	15.2	15.2	15.2	61.221	0	157.78	3400500000	14	A0A1W2PPH1;A0A1W2PQH3;P23368;A0A1W2PR68;A0A1W2PQT3;A0A1W2PQY8;tr|A0A1U8C1L9|A0A1U8C1L9_MESAU;A0A1W2PQ37;A0A1W2PQF8;P23368-2	A0A1W2PPH1;A0A1W2PQH3;P23368;A0A1W2PR68;A0A1W2PQT3;A0A1W2PQY8;tr|A0A1U8C1L9|A0A1U8C1L9_MESAU;A0A1W2PQ37;A0A1W2PQF8;P23368-2	NAD-dependent malic enzyme, mitochondrial	ME2
4890200	2073400	999320	2154200	818870	4091600	943010	848510				Homo sapiens	biological regulation;biosynthetic process;cellular biosynthetic process;cellular macromolecule biosynthetic process;cellular macromolecule metabolic process;cellular metabolic process;cellular nitrogen compound metabolic process;cellular process;cellular response to stimulus;cellular response to stress;developmental process;DNA metabolic process;DNA repair;gene expression;macromolecule biosynthe…	binding;catalytic activity;cation binding;chromatin binding;DNA binding;DNA-directed RNA polymerase activity;ion binding;metal ion binding;nucleic acid binding;nucleoside binding;nucleotidyltransferase activity;ribonucleoside binding;RNA polymerase activity;transferase activity;transferase activity, transferring phosphorus-containing groups	cell part;DNA-directed RNA polymerase complex;DNA-directed RNA polymerase II, core complex;intracellular membrane-bounded organelle;intracellular organelle;intracellular organelle part;intracellular part;macromolecular complex;membrane;membrane-bounded organelle;nuclear DNA-directed RNA polymerase complex;nuclear part;nucleoplasm;nucleoplasm part;nucleus;organelle;organelle part;protein complex;R…	9	9	9	9.1	9.1	9.1	121.37	0	10.717	1302300000	16	C9J4M6;A0A1W2PPT5;C9J2Y9;tr|A0A1U7R4C7|A0A1U7R4C7_MESAU;P30876	C9J4M6;A0A1W2PPT5;C9J2Y9;tr|A0A1U7R4C7|A0A1U7R4C7_MESAU;P30876	DNA-directed RNA polymerase;DNA-directed RNA polymerase II subunit RPB2	POLR2B
0	0	0	0	0	1366900	0	14517000				Homo sapiens	biological adhesion;cell adhesion;cellular process;establishment of localization;establishment of localization in cell;establishment of protein localization;establishment of protein localization to organelle;establishment of protein localization to vacuole;intracellular protein transport;intracellular transport;lysosomal transport;protein targeting;protein targeting to lysosome;protein targeting …	binding;enzyme binding;protein binding;receptor activity	adherens junction;anchoring junction;cell junction;cell part;cell-substrate adherens junction;cell-substrate junction;cytoplasmic part;extracellular membrane-bounded organelle;extracellular organelle;extracellular region part;extracellular vesicular exosome;focal adhesion;integral to membrane;intracellular organelle lumen;intracellular organelle part;intracellular part;intrinsic to membrane;lysos…	3	3	3	11.6	11.6	11.6	49.204	0	36.769	365320000	4	A0A1W2PPX5;A0A1W2PPU6;A0A1W2PQR6;A0A1W2PQB7;A0A1W2PS43;A0A1W2PRS1;Q14108;A0A1W2PRF6;Q14108-2;A0A1W2PSE4;tr|I1WYE0|I1WYE0_MESAU	A0A1W2PPX5;A0A1W2PPU6;A0A1W2PQR6;A0A1W2PQB7;A0A1W2PS43;A0A1W2PRS1;Q14108;A0A1W2PRF6;Q14108-2	Lysosome membrane protein 2	SCARB2
51875000	38085000	51352000	6459900	27808000	62427000	18322000	0				Homo sapiens	biological regulation;biosynthetic process;cell differentiation;cellular biosynthetic process;cellular developmental process;cellular macromolecule biosynthetic process;cellular macromolecule metabolic process;cellular metabolic process;cellular nitrogen compound metabolic process;cellular process;cellular response to stimulus;cellular response to stress;developmental process;DNA metabolic proces…	binding;cation binding;DNA binding;ion binding;metal ion binding;nucleic acid binding;transition metal ion binding;zinc ion binding	cell part;intracellular membrane-bounded organelle;intracellular non-membrane-bounded organelle;intracellular organelle;intracellular organelle part;intracellular part;membrane-bounded organelle;non-membrane-bounded organelle;nuclear part;nucleolus;nucleoplasm;nucleus;organelle;organelle part	4	4	4	40	40	40	10.228	0	5.0764	4226700000	5	E5RJ93;E5RIS7;tr|A0A1U8CM42|A0A1U8CM42_MESAU;A0A1W2PPZ5;P23193;A0A1W2PRL9;P23193-2;E5RK46;A0A1W2PS15;E5RFI1;A0A1W2PPV7;B7Z4S1	E5RJ93;E5RIS7;tr|A0A1U8CM42|A0A1U8CM42_MESAU;A0A1W2PPZ5;P23193;A0A1W2PRL9;P23193-2	Transcription elongation factor A protein 1	TCEA1
2040200	13676000	10640000	708620	7770500	4654700	0	7657700				Homo sapiens	apoptosis;biological regulation;biosynthetic process;cell death;cellular biosynthetic process;cellular macromolecule biosynthetic process;cellular macromolecule metabolic process;cellular metabolic process;cellular nitrogen compound metabolic process;cellular process;cellular response to stimulus;cellular response to stress;death;macromolecule biosynthetic process;macromolecule metabolic process;…	binding;DNA binding;nucleic acid binding	cell part;cytoplasm;intracellular membrane-bounded organelle;intracellular non-membrane-bounded organelle;intracellular organelle;intracellular organelle part;intracellular part;membrane-bounded organelle;non-membrane-bounded organelle;nuclear part;nucleolus;nucleoplasm;nucleus;organelle;organelle part	9	9	9	15.8	15.8	15.8	80.618	0	12.876	1619200000	20	A0A1W2PQ43;E9PK09;E9PQN2;E9PKI6;E9PK91;Q9NYF8-3;Q9NYF8-2;Q9NYF8;Q9NYF8-4;E9PJA7;tr|A0A1U8BQ25|A0A1U8BQ25_MESAU;tr|A0A1U8BDY8|A0A1U8BDY8_MESAU;tr|A0A1U8BDS0|A0A1U8BDS0_MESAU;tr|A0A1U8BHG4|A0A1U8BHG4_MESAU;H0YF00	A0A1W2PQ43;E9PK09;E9PQN2;E9PKI6;E9PK91;Q9NYF8-3;Q9NYF8-2;Q9NYF8;Q9NYF8-4;E9PJA7	Bcl-2-associated transcription factor 1	BCLAF1
9059100	22880000	25833000	6048100	23749000	34926000	6003800	22350000				Homo sapiens	biological regulation;biosynthetic process;cellular biosynthetic process;cellular macromolecule biosynthetic process;cellular macromolecule metabolic process;cellular metabolic process;cellular nitrogen compound metabolic process;cellular process;macromolecule biosynthetic process;macromolecule metabolic process;metabolic process;mRNA metabolic process;mRNA processing;nitrogen compound metabolic …	adenyl nucleotide binding;adenyl ribonucleotide binding;ATP binding;ATPase activity;ATPase activity, coupled;ATP-dependent helicase activity;ATP-dependent RNA helicase activity;binding;catalytic activity;estrogen receptor binding;helicase activity;hormone receptor binding;hydrolase activity;hydrolase activity, acting on acid anhydrides;hydrolase activity, acting on acid anhydrides, in phosphorus-…	cell part;cytoplasm;intracellular membrane-bounded organelle;intracellular non-membrane-bounded organelle;intracellular organelle;intracellular organelle part;intracellular part;membrane;membrane-bounded organelle;non-membrane-bounded organelle;nuclear part;nucleolus;nucleoplasm;nucleus;organelle;organelle part	19	18	13	31.3	29.8	23.9	80.253	0	323.31	13504000000	98	A0A1X7SBZ2;A0A1W2PQ51;Q92841;Q92841-1;Q92841-3;Q92841-2;tr|A0A1U8BSM7|A0A1U8BSM7_MESAU;A0A0U1RQJ0	A0A1X7SBZ2;A0A1W2PQ51;Q92841;Q92841-1;Q92841-3;Q92841-2;tr|A0A1U8BSM7|A0A1U8BSM7_MESAU	Probable ATP-dependent RNA helicase DDX17	DDX17
112330000	38620000	54952000	28074000	83914000	98767000	24685000	92273000				Homo sapiens		catalytic activity;hydrolase activity	cell part;cytoplasm;intracellular part	9	9	0	33.7	33.7	0	33.14	0	68.817	21763000000	199	A0A1W2PQS6;F6U211;S4R435;tr|A0A1U8CWC2|A0A1U8CWC2_MESAU	A0A1W2PQS6;F6U211;S4R435		RPS10;RPS10-NUDT3
3863400	5084100	3921800	2613700	8016700	10660000	3509900	5623900				Homo sapiens	alcohol metabolic process;anatomical structure development;brain development;carbohydrate metabolic process;carbohydrate phosphorylation;cellular carbohydrate metabolic process;cellular metabolic process;cellular process;developmental process;fructose 2,6-bisphosphate metabolic process;fructose metabolic process;glucose metabolic process;hexose metabolic process;metabolic process;monosaccharide m…	6-phosphofructo-2-kinase activity;adenyl nucleotide binding;adenyl ribonucleotide binding;ATP binding;binding;carbohydrate kinase activity;carbohydrate phosphatase activity;catalytic activity;fructose-2,6-bisphosphate 2-phosphatase activity;hydrolase activity;hydrolase activity, acting on ester bonds;kinase activity;nucleotide binding;phosphatase activity;phosphofructokinase activity;phosphoric e…	cell part;cytoplasmic part;cytosol;intracellular organelle part;intracellular part;nuclear part;nucleoplasm;organelle part	9	8	7	18.9	17	15	58.869	0	61.821	3288300000	33	tr|A0A1U8C2X7|A0A1U8C2X7_MESAU;Q5W015;tr|A0A1U7QDS3|A0A1U7QDS3_MESAU;tr|A0A1U8BSB1|A0A1U8BSB1_MESAU;Q5VX20;tr|A0A1U7Q7F7|A0A1U7Q7F7_MESAU;tr|A0A1U7QGH3|A0A1U7QGH3_MESAU;tr|A0A1U7QRY8|A0A1U7QRY8_MESAU;A0A1W2PR17;Q16875-3;Q16875-2;Q16875;Q16875-4;F2Z2I2;H0Y483;Q9H178;A0A1W2PNV9;tr|A0A1U8C8S8|A0A1U8C8S8_MESAU;tr|A0A1U8CJK1|A0A1U8CJK1_MESAU;tr|A0A1U7QVD0|A0A1U7QVD0_MESAU;O60825-2;O60825	tr|A0A1U8C2X7|A0A1U8C2X7_MESAU;Q5W015;tr|A0A1U7QDS3|A0A1U7QDS3_MESAU;tr|A0A1U8BSB1|A0A1U8BSB1_MESAU;Q5VX20;tr|A0A1U7Q7F7|A0A1U7Q7F7_MESAU;tr|A0A1U7QGH3|A0A1U7QGH3_MESAU;tr|A0A1U7QRY8|A0A1U7QRY8_MESAU;A0A1W2PR17;Q16875-3;Q16875-2;Q16875;Q16875-4;F2Z2I2	6-phosphofructo-2-kinase/fructose-2,6-bisphosphatase 3;6-phosphofructo-2-kinase;Fructose-2,6-bisphosphatase	PFKFB3
0	3312400	6087200	0	7291100	8715600	0	0				Homo sapiens	amine biosynthetic process;amine metabolic process;anatomical structure morphogenesis;biological regulation;biosynthetic process;carboxylic acid biosynthetic process;carboxylic acid metabolic process;cellular amine metabolic process;cellular amino acid biosynthetic process;cellular amino acid metabolic process;cellular biosynthetic process;cellular ketone metabolic process;cellular metabolic proc…	catalytic activity;guanidinoacetate N-methyltransferase activity;methyltransferase activity;S-adenosylmethionine-dependent methyltransferase activity;transferase activity;transferase activity, transferring one-carbon groups	cell part;cytoplasmic part;cytosol;extracellular membrane-bounded organelle;extracellular organelle;extracellular region part;extracellular vesicular exosome;intracellular part;membrane-bounded organelle;membrane-bounded vesicle;organelle;vesicle	1	1	1	6.6	6.6	6.6	23.804	0.0021652	2.9649	152440000	3	A0A1W2PR36;tr|A0A1U7R8J7|A0A1U7R8J7_MESAU;Q14353	A0A1W2PR36;tr|A0A1U7R8J7|A0A1U7R8J7_MESAU;Q14353	Guanidinoacetate N-methyltransferase	GAMT
305660	0	331150	256390	0	414740	0	0				Homo sapiens	biosynthetic process;cellular biosynthetic process;cellular lipid metabolic process;cellular metabolic process;cellular process;dephosphorylation;glycerolipid biosynthetic process;glycerolipid metabolic process;glycerophospholipid biosynthetic process;glycerophospholipid metabolic process;lipid biosynthetic process;lipid metabolic process;lipid modification;metabolic process;organophosphate metab…	binding;catalytic activity;hydrolase activity;hydrolase activity, acting on ester bonds;inositol or phosphatidylinositol phosphatase activity;nucleic acid binding;nucleotide binding;phosphatase activity;phosphatidylinositol bisphosphate phosphatase activity;phosphatidylinositol phosphate 5-phosphatase activity;phosphatidylinositol-4,5-bisphosphate 5-phosphatase activity;phosphoric ester hydrolase…	cell part;cytoplasmic part;cytosol;intracellular part;membrane	3	3	3	4.1	4.1	4.1	139.28	0.00034141	4.188	73245000	3	A0A1W2PR85;O15056-3;O15056-2;O15056;E7ER60;tr|A0A1U8BQ46|A0A1U8BQ46_MESAU;tr|A0A1U8BE08|A0A1U8BE08_MESAU;tr|A0A1U8BDU1|A0A1U8BDU1_MESAU;tr|A0A1U8BHI0|A0A1U8BHI0_MESAU;tr|A0A1U8BQV9|A0A1U8BQV9_MESAU;tr|A0A1U7QH51|A0A1U7QH51_MESAU;tr|A0A1U8BE04|A0A1U8BE04_MESAU;tr|A0A1U7QEK0|A0A1U7QEK0_MESAU	A0A1W2PR85;O15056-3;O15056-2;O15056;E7ER60	Synaptojanin-2	SYNJ2
882660	375210	0	234920	0	496700	133640	196530				Homo sapiens	activation of immune response;activation of innate immune response;autophagic vacuole assembly;autophagy;biological regulation;biosynthetic process;catabolic process;cell communication;cell surface receptor linked signaling pathway;cellular biosynthetic process;cellular catabolic process;cellular component assembly;cellular component assembly at cellular level;cellular component organization;cell…	1-phosphatidylinositol-3-kinase activity;adenyl nucleotide binding;adenyl ribonucleotide binding;ATP binding;binding;catalytic activity;inositol or phosphatidylinositol kinase activity;kinase activity;lipid kinase activity;nucleotide binding;phosphatidylinositol 3-kinase activity;phosphatidylinositol kinase activity;phosphotransferase activity, alcohol group as acceptor;protein kinase activity;pu…	axoneme;cell part;cell projection part;cytoplasmic membrane-bounded vesicle;cytoplasmic part;cytoplasmic vesicle;cytosol;cytosolic part;endocytic vesicle;endosome;intracellular membrane-bounded organelle;intracellular organelle;intracellular part;late endosome;macromolecular complex;membrane;membrane-bounded organelle;membrane-bounded vesicle;microbody;midbody;organelle;organelle part;peroxisome;…	3	3	3	3.7	3.7	3.7	101.49	0.001601	3.3815	142130000	3	tr|A0A1U8CKK8|A0A1U8CKK8_MESAU;A0A1W2PS05;Q8NEB9;K7ENH3;K7EIV6;K7EKH3;A8MYT4	tr|A0A1U8CKK8|A0A1U8CKK8_MESAU;A0A1W2PS05;Q8NEB9;K7ENH3;K7EIV6;K7EKH3;A8MYT4	Phosphatidylinositol 3-kinase catalytic subunit type 3;Phosphatidylinositol 3-kinase	PIK3C3
0	0	0	0	0	712730	0	0				Homo sapiens	cell differentiation;cellular developmental process;cellular process;developmental process;hemopoietic progenitor cell differentiation	binding;nucleic acid binding;nucleotide binding	cell part;intracellular membrane-bounded organelle;intracellular organelle;intracellular part;membrane-bounded organelle;nucleus;organelle	2	2	2	5.8	5.8	5.8	64.294	0.00035174	4.636	50167000	2	tr|A0A1U8BXP9|A0A1U8BXP9_MESAU;tr|A0A1U7QKY2|A0A1U7QKY2_MESAU;A0AV96-2;A0AV96;D6RCT1;D6RBP6;D6RA49;D6RFL5;D6R9M7;D6REZ6;D6RBS9;D6R9D6;B7Z8Z7	tr|A0A1U8BXP9|A0A1U8BXP9_MESAU;tr|A0A1U7QKY2|A0A1U7QKY2_MESAU;A0AV96-2;A0AV96;D6RCT1;D6RBP6;D6RA49;D6RFL5;D6R9M7;D6REZ6;D6RBS9;D6R9D6;B7Z8Z7	RNA-binding protein 47	RBM47
43268000	44957000	39885000	15801000	51243000	85931000	36894000	43543000				Homo sapiens	catabolic process;cellular catabolic process;cellular macromolecule catabolic process;cellular macromolecule metabolic process;cellular metabolic process;cellular process;cellular protein metabolic process;macromolecule catabolic process;macromolecule metabolic process;macromolecule modification;metabolic process;modification-dependent macromolecule catabolic process;modification-dependent protei…	adenyl nucleotide binding;adenyl ribonucleotide binding;ATP binding;binding;catalytic activity;FAT10 activating enzyme activity;nucleotide binding;purine nucleotide binding;purine ribonucleoside triphosphate binding;purine ribonucleotide binding;ribonucleotide binding;small protein activating enzyme activity	cell part;cytoplasm;cytoplasmic part;cytosol;intracellular part	30	30	30	37	37	37	117.97	0	323.31	22011000000	184	A0AVT1;A0AVT1-2;H0Y8S8;A0AVT1-3;A0AVT1-4;tr|A0A1U8BVW2|A0A1U8BVW2_MESAU;H0Y9U5	A0AVT1;A0AVT1-2	Ubiquitin-like modifier-activating enzyme 6	UBA6
6753200	2440600	4218200	3499900	6851100	14979000	5374800	3205500				Homo sapiens	axon guidance;biological regulation;chemotaxis;locomotion;regulation of biological process;regulation of cellular process;regulation of establishment of cell polarity;regulation of establishment or maintenance of cell polarity;response to chemical stimulus;response to external stimulus;response to stimulus;taxis		axon part;axonal growth cone;cell part;cell projection part;growth cone;site of polarized growth	9	9	9	20.7	20.7	20.7	64.519	0	20.321	1609000000	23	A0MZ66-5;A0MZ66-6;A0MZ66;A0MZ66-3;A0MZ66-8;A0MZ66-4;A0MZ66-7;A0MZ66-2;tr|A0A1U8CKT6|A0A1U8CKT6_MESAU	A0MZ66-5;A0MZ66-6;A0MZ66;A0MZ66-3;A0MZ66-8;A0MZ66-4;A0MZ66-7;A0MZ66-2	Shootin-1	KIAA1598
3575800	1604100	1488100	955600	1441900	3939600	3264000	0				Homo sapiens	adipose tissue development;anatomical structure development;biological regulation;bone development;cell differentiation;cellular component assembly;cellular component disassembly;cellular component disassembly at cellular level;cellular component organization;cellular component organization at cellular level;cellular component organization or biogenesis;cellular component organization or biogenes…	binding;lipid binding;phosphatidylinositol binding;phosphatidylinositol-3,5-bisphosphate binding;phosphatidylinositol-3-phosphate binding;phosphatidylinositol-4-phosphate binding;phosphatidylinositol-5-phosphate binding;phospholipid binding;protein binding;protein domain specific binding;SH2 domain binding	cell junction;cell part;cell projection;cytoplasm;cytoskeletal part;intracellular non-membrane-bounded organelle;intracellular organelle;intracellular organelle part;intracellular part;macromolecular complex;non-membrane-bounded organelle;organelle;organelle part;podosome;protein complex	5	5	3	6.4	6.4	4.5	101.58	0	7.0326	1979100000	6	A1X283	A1X283	SH3 and PX domain-containing protein 2B	SH3PXD2B
0	1084300	1410800	658770	2002200	2569500	751330	2393700				Homo sapiens	acetyl-CoA catabolic process;acetyl-CoA metabolic process;carboxylic acid metabolic process;catabolic process;cellular catabolic process;cellular ketone metabolic process;cellular metabolic process;cellular process;citrate metabolic process;coenzyme catabolic process;coenzyme metabolic process;cofactor catabolic process;cofactor metabolic process;generation of precursor metabolites and energy;iso…	3 iron, 4 sulfur cluster binding;4 iron, 4 sulfur cluster binding;aconitate hydratase activity;binding;carbon-oxygen lyase activity;catalytic activity;cation binding;hydro-lyase activity;ion binding;iron ion binding;iron-sulfur cluster binding;lyase activity;metal cluster binding;metal ion binding;transition metal ion binding	cell part;cytoplasmic part;intracellular membrane-bounded organelle;intracellular organelle;intracellular organelle lumen;intracellular organelle part;intracellular part;membrane-bounded organelle;membrane-enclosed lumen;mitochondrial matrix;mitochondrial part;mitochondrion;nucleus;organelle;organelle lumen;organelle part	6	3	3	10.7	5.3	5.3	87.819	0	5.7992	440120000	5	A2A274;Q99798	A2A274;Q99798	Aconitate hydratase, mitochondrial	ACO2
263580000	177330000	247670000	64101000	219130000	266970000	47512000	147290000				Homo sapiens	activation of immune response;activation of innate immune response;anaphase-promoting complex-dependent proteasomal ubiquitin-dependent protein catabolic process;antigen processing and presentation;antigen processing and presentation of exogenous antigen;antigen processing and presentation of exogenous peptide antigen;antigen processing and presentation of exogenous peptide antigen via MHC class …	catalytic activity;endopeptidase activity;hydrolase activity;peptidase activity;peptidase activity, acting on L-amino acid peptides;threonine-type endopeptidase activity;threonine-type peptidase activity	cell part;cytoplasm;cytoplasmic part;cytosol;extracellular membrane-bounded organelle;extracellular organelle;extracellular region part;extracellular vesicular exosome;intracellular membrane-bounded organelle;intracellular organelle;intracellular organelle part;intracellular part;macromolecular complex;membrane-bounded organelle;membrane-bounded vesicle;nuclear part;nucleoplasm;nucleus;organelle;…	6	6	6	37.8	37.8	37.8	20.96	0	28.924	14385000000	34	A2ACR1;P28065-2;P28065;A0A0G2JJA7;A2ACR0;A0A0G2JJQ0;tr|A0A1U7QVI9|A0A1U7QVI9_MESAU;A0A0G2JJ13;A0A0G2JHI2	A2ACR1;P28065-2;P28065;A0A0G2JJA7;A2ACR0	Proteasome subunit beta type;Proteasome subunit beta type-9	PSMB9
3038300	270270	1964500	130890	1173200	2479700	0	202150				Homo sapiens	biological regulation;catabolic process;cellular catabolic process;cellular macromolecule catabolic process;cellular macromolecule metabolic process;cellular metabolic process;cellular process;cellular protein catabolic process;cellular protein metabolic process;endosome to lysosome transport;endosome transport;establishment of localization;establishment of localization in cell;intracellular tran…	enzyme regulator activity;GTPase regulator activity;guanyl-nucleotide exchange factor activity;nucleoside-triphosphatase regulator activity;Rab guanyl-nucleotide exchange factor activity;Ras guanyl-nucleotide exchange factor activity;small GTPase regulator activity		4	4	4	3.3	3.3	3.3	135.89	0	5.4809	594160000	10	H0YAY3;E9PF32;A2RUS2-2;A2RUS2;E5RHH2;E5RI43	H0YAY3;E9PF32;A2RUS2-2;A2RUS2	DENN domain-containing protein 3	DENND3
0	0	0	352130	0	0	0	2522800				Homo sapiens	biological regulation;cellular process;cellular response to stimulus;regulation of biological process;regulation of cellular process;response to stimulus;signal transduction			2	2	2	2.3	2.3	2.3	98.034	0.0021472	2.8888	901540000	2	A4D1F6	A4D1F6	Leucine-rich repeat and death domain-containing protein 1	LRRD1
343120	766240	562970	0	834480	949490	446890	113360				Homo sapiens				3	3	3	5.1	5.1	5.1	79.239	0.00218	3.0395	491850000	4	C9J1X0;A4D1P6-2;A4D1P6;tr|A0A1U8CE60|A0A1U8CE60_MESAU;tr|A0A1U7QWG3|A0A1U7QWG3_MESAU;A4D1P6-3	C9J1X0;A4D1P6-2;A4D1P6;tr|A0A1U8CE60|A0A1U8CE60_MESAU;tr|A0A1U7QWG3|A0A1U7QWG3_MESAU;A4D1P6-3	WD repeat-containing protein 91	WDR91
3968100	17241000	4970900	3995500	10789000	10975000	7874300	12463000				Homo sapiens	cell projection organization;cellular component movement;cellular component organization;cellular component organization at cellular level;cellular component organization or biogenesis;cellular component organization or biogenesis at cellular level;cellular process;cilium movement;microtubule-based movement;microtubule-based process		axoneme;cell part;cell projection;cell projection part;centriole;cilium;cytoplasmic part;cytoskeletal part;intracellular non-membrane-bounded organelle;intracellular organelle;intracellular organelle part;intracellular part;microtubule organizing center part;non-membrane-bounded organelle;organelle;organelle part	1	1	1	2.5	2.5	2.5	47.391	0.007326	2.194	1721300000	6	K7EPK8;tr|A0A1U8C5U5|A0A1U8C5U5_MESAU;K7EN59;A5D8V7-2;A5D8V7	K7EPK8;tr|A0A1U8C5U5|A0A1U8C5U5_MESAU;K7EN59;A5D8V7-2;A5D8V7	Coiled-coil domain-containing protein 151	CCDC151
3259000	944590	1849300	236000	1649500	4425800	636880	874120				Homo sapiens	biological regulation;biosynthetic process;catabolic process;cellular biosynthetic process;cellular catabolic process;cellular macromolecule biosynthetic process;cellular macromolecule catabolic process;cellular macromolecule metabolic process;cellular metabolic process;cellular nitrogen compound metabolic process;cellular process;developmental process;gene expression;gene silencing;gene silencin…	armadillo repeat domain binding;binding;estrogen receptor binding;hormone receptor binding;nuclear hormone receptor binding;protein binding;protein complex scaffold;protein domain specific binding;receptor binding;retinoic acid receptor binding;steroid hormone receptor binding;structural molecule activity;transcription factor binding	CCR4-NOT complex;cell part;cytoplasmic mRNA processing body;cytoplasmic part;cytosol;extracellular region part;extracellular space;intracellular membrane-bounded organelle;intracellular non-membrane-bounded organelle;intracellular organelle;intracellular organelle part;intracellular part;macromolecular complex;membrane;membrane-bounded organelle;microbody;microbody membrane;microbody part;non-mem…	13	13	13	5.8	5.8	5.8	266.38	0	25.504	8792500000	42	A5YKK6-2;A5YKK6;tr|A0A1U7QGY5|A0A1U7QGY5_MESAU;A5YKK6-3;A5YKK6-4;H3BVC9;H3BNB1;H3BR89;H3BMH0;H3BMZ2	A5YKK6-2;A5YKK6;tr|A0A1U7QGY5|A0A1U7QGY5_MESAU;A5YKK6-3;A5YKK6-4	CCR4-NOT transcription complex subunit 1	CNOT1
27364000	3012500	15295000	0	3174200	26527000	3027600	5392700				Homo sapiens	autophagic vacuole assembly;autophagy;catabolic process;cell communication;cellular catabolic process;cellular component assembly;cellular component assembly at cellular level;cellular component organization;cellular component organization at cellular level;cellular component organization or biogenesis;cellular component organization or biogenesis at cellular level;cellular metabolic process;cell…	binding;cytoskeletal protein binding;microtubule binding;protein binding;tubulin binding	autophagic vacuole;autophagic vacuole membrane;axoneme;cell part;cell projection part;cytoplasmic part;cytoplasmic vesicle;cytoskeletal part;cytosol;endomembrane system;extrinsic to membrane;intracellular;intracellular membrane-bounded organelle;intracellular organelle;intracellular organelle part;intracellular part;macromolecular complex;membrane;membrane part;membrane-bounded organelle;microtub…	2	2	1	28	28	18.7	9.0115	0.00067227	3.9784	2948200000	20	H3BTL1;tr|A0A1U7QIV1|A0A1U7QIV1_MESAU;Q9GZQ8;A6NCE7	H3BTL1;tr|A0A1U7QIV1|A0A1U7QIV1_MESAU;Q9GZQ8;A6NCE7	Microtubule-associated proteins 1A/1B light chain 3B;Microtubule-associated proteins 1A/1B light chain 3 beta 2	MAP1LC3B;MAP1LC3B2
0	0	0	0	0	0	0	0				Homo sapiens		structural molecule activity	cell part;cytoskeletal part;extracellular region part;extracellular space;intermediate filament;intracellular organelle part;intracellular part;keratin filament;macromolecular complex;organelle part;protein complex	22	1	1	67.8	7.5	7.5	29.117	0.0043732	2.4465	51322000	1	A6NCN2	A6NCN2	Putative keratin-87 protein	KRT87P
15869000	10488000	21140000	3542200	21093000	31661000	10879000	12118000				Homo sapiens	carbohydrate metabolic process;cellular macromolecule metabolic process;cellular metabolic process;cellular process;cellular protein metabolic process;dephosphorylation;macromolecule metabolic process;macromolecule modification;metabolic process;peptidyl-tyrosine dephosphorylation;phosphate-containing compound metabolic process;phosphorus metabolic process;primary metabolic process;protein dephos…	binding;catalytic activity;cation binding;hydrolase activity;hydrolase activity, acting on ester bonds;ion binding;magnesium ion binding;metal ion binding;phosphatase activity;phosphoglycolate phosphatase activity;phosphoprotein phosphatase activity;phosphoric ester hydrolase activity;protein tyrosine phosphatase activity		6	6	6	24.6	24.6	24.6	34.006	0	130.18	2320500000	31	A6NDG6;tr|A0A1U7R615|A0A1U7R615_MESAU;H3BV17	A6NDG6;tr|A0A1U7R615|A0A1U7R615_MESAU	Phosphoglycolate phosphatase	PGP
164680000	93930000	151750000	60398000	199650000	284089984	104150000	84650000				Homo sapiens	alcohol catabolic process;alcohol metabolic process;carbohydrate catabolic process;carbohydrate metabolic process;catabolic process;cellular carbohydrate catabolic process;cellular carbohydrate metabolic process;cellular catabolic process;cellular metabolic process;cellular nitrogen compound catabolic process;cellular nitrogen compound metabolic process;cellular process;D-ribose catabolic process…	ADP-ribose diphosphatase activity;ADP-sugar diphosphatase activity;binding;catalytic activity;cation binding;hydrolase activity;hydrolase activity, acting on acid anhydrides;hydrolase activity, acting on acid anhydrides, in phosphorus-containing anhydrides;ion binding;magnesium ion binding;metal ion binding;nucleic acid binding;nucleoside-diphosphatase activity;pyrophosphatase activity;RNA bindin…	cell part;cytoplasmic part;cytosol;extracellular membrane-bounded organelle;extracellular organelle;extracellular region part;extracellular vesicular exosome;intracellular;intracellular membrane-bounded organelle;intracellular organelle;intracellular part;membrane-bounded organelle;membrane-bounded vesicle;nucleus;organelle;vesicle	12	12	12	54.3	54.3	54.3	25.895	0	318.55	14015000000	105	A6NFX8;Q9UKK9;A6NJU6;A6NCQ0;tr|A0A1U7QL79|A0A1U7QL79_MESAU;H0YEY4;C9JYY9	A6NFX8;Q9UKK9;A6NJU6;A6NCQ0;tr|A0A1U7QL79|A0A1U7QL79_MESAU	ADP-sugar pyrophosphatase	NUDT5
69790000	29638000	47086000	8578300	37949000	74150000	58532000	15031000				Homo sapiens	biological regulation;cellular process;cellular response to chemical stimulus;cellular response to endogenous stimulus;cellular response to estrogen stimulus;cellular response to hormone stimulus;cellular response to organic substance;cellular response to steroid hormone stimulus;cellular response to stimulus;establishment of localization;establishment of protein localization;positive regulation …	binding;chromatin binding;chromatin DNA binding;core promoter binding;core promoter sequence-specific DNA binding;DNA binding;nucleic acid binding;protein binding transcription factor activity;regulatory region DNA binding;regulatory region nucleic acid binding;RNA polymerase II core promoter sequence-specific DNA binding;RNA polymerase II regulatory region DNA binding;RNA polymerase II regulator…	cell part;chromatin;chromosomal part;intracellular organelle part;intracellular part;nuclear chromatin;nuclear chromosome part;nuclear part;organelle part	3	3	3	12	12	12	18.224	0	6.2578	2788000000	18	K7EIJ0;K7ENL2;A6NG10;tr|A0A1U8BZG2|A0A1U8BZG2_MESAU;K7EMC9;tr|A0A1U7QDB1|A0A1U7QDB1_MESAU;tr|A0A1U8BNZ4|A0A1U8BNZ4_MESAU;Q969T9;tr|A0A1U8C037|A0A1U8C037_MESAU;B4DFG2;K7EIN1;K7ESN4;K7EIK1	K7EIJ0;K7ENL2;A6NG10;tr|A0A1U8BZG2|A0A1U8BZG2_MESAU;K7EMC9;tr|A0A1U7QDB1|A0A1U7QDB1_MESAU;tr|A0A1U8BNZ4|A0A1U8BNZ4_MESAU;Q969T9;tr|A0A1U8C037|A0A1U8C037_MESAU;B4DFG2	WW domain-binding protein 2	WBP2
0	2627200	3046800	0	5385300	4191800	0	1749200				Homo sapiens	biological regulation;biosynthetic process;cell cycle;cell cycle process;cellular biosynthetic process;cellular component organization;cellular component organization at cellular level;cellular component organization or biogenesis;cellular component organization or biogenesis at cellular level;cellular macromolecule biosynthetic process;cellular macromolecule metabolic process;cellular metabolic …	binding;catalytic activity;cation binding;deacetylase activity;histone deacetylase activity;histone deacetylase activity (H3-K14 specific);histone deacetylase activity (H3-K9 specific);hydrolase activity;hydrolase activity, acting on carbon-nitrogen (but not peptide) bonds;hydrolase activity, acting on carbon-nitrogen (but not peptide) bonds, in linear amides;ion binding;metal ion binding;NAD-dep…	cell part;chromatin remodeling complex;chromosome;cytoplasm;cytoplasmic part;cytosol;histone deacetylase complex;intracellular membrane-bounded organelle;intracellular non-membrane-bounded organelle;intracellular organelle;intracellular organelle part;intracellular part;macromolecular complex;membrane;membrane-bounded organelle;non-membrane-bounded organelle;nuclear chromosome;nuclear part;nucleo…	2	2	2	14.1	14.1	14.1	27.475	0	5.4271	238730000	4	A6NGJ7;A6NMT1;Q9BY41-5;Q9BY41-2;Q9BY41-4;Q9BY41;E7EVA8;tr|A0A1U7QL71|A0A1U7QL71_MESAU;Q9BY41-6	A6NGJ7;A6NMT1;Q9BY41-5;Q9BY41-2;Q9BY41-4;Q9BY41;E7EVA8;tr|A0A1U7QL71|A0A1U7QL71_MESAU;Q9BY41-6	Histone deacetylase 8	HDAC8
21871000	8278700	7308400	2656500	10070000	18702000	4156400	2994300				Homo sapiens			cell part;cytoplasm;intracellular membrane-bounded organelle;intracellular organelle;intracellular part;membrane;membrane-bounded organelle;nucleus;organelle;plasma membrane	4	4	4	35.3	35.3	35.3	17.603	0	11.29	785150000	11	H3BU16;A6NGP5;Q9H910-2;Q9H910;Q9H910-3;H3BMT0;H3BTV5;H3BMV3;H3BMM8;B4E1P3	H3BU16;A6NGP5;Q9H910-2;Q9H910;Q9H910-3;H3BMT0;H3BTV5;H3BMV3	Hematological and neurological expressed 1-like protein	HN1L
0	1946400	2138800	3171700	2719700	1856400	5869800	2288700				Homo sapiens	cellular component assembly;cellular component assembly at cellular level;cellular component organization;cellular component organization at cellular level;cellular component organization or biogenesis;cellular component organization or biogenesis at cellular level;cellular macromolecular complex assembly;cellular macromolecular complex subunit organization;cellular process;cellular protein compl…	binding;catalytic activity;GTP binding;GTPase activity;guanyl nucleotide binding;guanyl ribonucleotide binding;hydrolase activity;hydrolase activity, acting on acid anhydrides;hydrolase activity, acting on acid anhydrides, in phosphorus-containing anhydrides;nucleoside-triphosphatase activity;nucleotide binding;purine nucleotide binding;purine ribonucleoside triphosphate binding;purine ribonucleo…	cell part;cytoplasm;cytoskeletal part;intracellular organelle part;intracellular part;macromolecular complex;microtubule;organelle part;protein complex	5	1	1	11.3	4.2	4.2	45.517	0.00034722	4.4006	1890400000	43	A6NHL2-2;A6NHL2;tr|A0A1U7Q7G3|A0A1U7Q7G3_MESAU	A6NHL2-2;A6NHL2;tr|A0A1U7Q7G3|A0A1U7Q7G3_MESAU	Tubulin alpha chain-like 3	TUBAL3
42538000	6953900	12341000	17001000	12991000	34520000	26766000	5357900				Homo sapiens	antigen processing and presentation;antigen processing and presentation of exogenous antigen;antigen processing and presentation of exogenous peptide antigen;antigen processing and presentation of exogenous peptide antigen via MHC class I;antigen processing and presentation of exogenous peptide antigen via MHC class I, TAP-dependent;antigen processing and presentation of peptide antigen;antigen p…	binding;catalytic activity;electron carrier activity;lipid binding;oxidoreductase activity;oxidoreductase activity, acting on NADH or NADPH;oxidoreductase activity, acting on NADH or NADPH, oxygen as acceptor;phosphatidylinositol binding;phosphatidylinositol-3,4-bisphosphate binding;phospholipid binding;protein binding;protein domain specific binding;SH3 domain binding;superoxide-generating NADPH…	cell body;cell part;cell projection;cytoplasm;cytoplasmic membrane-bounded vesicle;cytoplasmic part;cytoplasmic vesicle;cytosol;dendrite;endocytic vesicle;endoplasmic reticulum;extrinsic to membrane;Golgi apparatus;intracellular membrane-bounded organelle;intracellular organelle;intracellular part;lysosome;lytic vacuole;macromolecular complex;membrane part;membrane-bounded organelle;membrane-boun…	10	10	10	35.4	35.4	35.4	44.651	0	112.53	4967500000	57	P14598;A6NI72;A8MVU1;P14598-2;C9J155;H7C1S1	P14598;A6NI72;A8MVU1;P14598-2	Neutrophil cytosol factor 1;Putative neutrophil cytosol factor 1B;Putative neutrophil cytosol factor 1C	NCF1;NCF1B;NCF1C
5125600	0	5279300	2139500	3231500	6091400	3149100	2314300				Homo sapiens	anatomical structure morphogenesis;biological regulation;cell communication;cell part morphogenesis;cell projection morphogenesis;cell projection organization;cell-cell signaling;cellular component morphogenesis;cellular component organization;cellular component organization at cellular level;cellular component organization or biogenesis;cellular component organization or biogenesis at cellular l…	binding;lipid binding	cell part;cell projection;cell projection part;centrosome;ciliary transition zone;cilium;cilium part;cytoplasmic part;cytoskeletal part;cytosol;extracellular region part;intercellular bridge;intracellular non-membrane-bounded organelle;intracellular organelle;intracellular organelle part;intracellular part;microtubule organizing center;non-membrane-bounded organelle;organelle;organelle part;prima…	2	2	2	10.4	10.4	10.4	28.136	0.00034953	4.5109	429890000	9	A6NIH7;K7EJU3;K7EN86;C9JSK0;tr|A0A1U8CHP1|A0A1U8CHP1_MESAU;tr|A0A1U7R0N3|A0A1U7R0N3_MESAU;Q13432-2;Q13432	A6NIH7;K7EJU3;K7EN86;C9JSK0;tr|A0A1U8CHP1|A0A1U8CHP1_MESAU;tr|A0A1U7R0N3|A0A1U7R0N3_MESAU;Q13432-2;Q13432	Protein unc-119 homolog B;Protein unc-119 homolog A	UNC119B;UNC119
59231000	54762000	69799000	22520000	67207000	105150000	33721000	53751000				Homo sapiens	biosynthetic process;cellular biosynthetic process;cellular macromolecule biosynthetic process;cellular macromolecule metabolic process;cellular metabolic process;cellular process;cellular protein metabolic process;gene expression;macromolecule biosynthetic process;macromolecule metabolic process;metabolic process;primary metabolic process;protein metabolic process;translation;translational initi…	binding;nucleic acid binding;RNA binding;translation factor activity, nucleic acid binding;translation initiation factor activity	cell part;cytoplasmic part;cytosol;intracellular part	2	2	2	16.5	16.5	16.5	14.455	0.00065488	3.6192	2873000000	10	A6NJH9;tr|A0A1U8BXT0|A0A1U8BXT0_MESAU;tr|A0A1U7QHW3|A0A1U7QHW3_MESAU;P47813;O14602;X6RAC9	A6NJH9;tr|A0A1U8BXT0|A0A1U8BXT0_MESAU;tr|A0A1U7QHW3|A0A1U7QHW3_MESAU;P47813;O14602;X6RAC9	Eukaryotic translation initiation factor 1A, X-chromosomal;Eukaryotic translation initiation factor 1A, Y-chromosomal	EIF1AY;EIF1AX
5762800	0	1187300	2186500	1041700	3808600	852740	0				Homo sapiens	alcohol catabolic process;alcohol metabolic process;amino sugar catabolic process;amino sugar metabolic process;biological regulation;carbohydrate catabolic process;carbohydrate metabolic process;carboxylic acid metabolic process;catabolic process;cellular carbohydrate catabolic process;cellular carbohydrate metabolic process;cellular ketone metabolic process;cellular metabolic process;cellular p…	adenyl nucleotide binding;adenyl ribonucleotide binding;ATP binding;binding;catalytic activity;endopeptidase inhibitor activity;endopeptidase regulator activity;enzyme inhibitor activity;enzyme regulator activity;isomerase activity;N-acylglucosamine 2-epimerase activity;nucleotide binding;peptidase inhibitor activity;peptidase regulator activity;purine nucleotide binding;purine ribonucleoside tri…	extracellular membrane-bounded organelle;extracellular organelle;extracellular region part;extracellular vesicular exosome;membrane-bounded organelle;membrane-bounded vesicle;organelle;vesicle	3	3	3	7.5	7.5	7.5	47.065	0.0021335	2.8321	281950000	2	A6NKZ2;P51606;H7C1A7;P51606-2;tr|A0A1U7QBG8|A0A1U7QBG8_MESAU	A6NKZ2;P51606;H7C1A7;P51606-2	N-acylglucosamine 2-epimerase	RENBP
0	0	0	0	0	21061000	0	31785000				Homo sapiens	biological regulation;cellular process;cellular response to stimulus;ER to Golgi vesicle-mediated transport;establishment of localization;establishment of localization in cell;establishment of protein localization;Golgi vesicle transport;intracellular signal transduction;intracellular transport;protein transport;regulation of biological process;regulation of cellular process;response to stimulus;…	binding;CCR chemokine receptor binding;CCR5 chemokine receptor binding;chemokine receptor binding;cytokine receptor binding;G-protein-coupled receptor binding;protein binding;receptor binding	cell part;cytoplasmic part;endoplasmic reticulum;endoplasmic reticulum-Golgi intermediate compartment;integral to membrane;intracellular membrane-bounded organelle;intracellular organelle;intracellular part;intrinsic to membrane;membrane;membrane part;membrane-bounded organelle;organelle	1	1	1	14.6	14.6	14.6	15.771	0	5.1988	105690000	1	A6NLH6;Q9P003	A6NLH6;Q9P003	Protein cornichon homolog 4	CNIH4
3775800	2042100	4455300	975520	5689800	4948400	4343700	3037400				Homo sapiens		binding;catalytic activity;cation binding;coenzyme binding;cofactor binding;ion binding;metal ion binding;NADP binding;NADPH:quinone reductase activity;nucleotide binding;oxidoreductase activity;oxidoreductase activity, acting on NADH or NADPH;oxidoreductase activity, acting on NADH or NADPH, quinone or similar compound as acceptor;transition metal ion binding;zinc ion binding	cell part;cytoplasmic part;cytosol;intracellular part	4	4	4	16.5	16.5	16.5	37.061	0	8.147	526820000	8	A6NMA8;O95825;H7C3S0;C9JQD0;C9K0F7;C9JAL0;F8WF64;H7C3I5;A6NND8;A6NHJ8;O95825-2;C9JZK8;tr|A0A1U8BWN1|A0A1U8BWN1_MESAU;tr|A0A1U8BWN2|A0A1U8BWN2_MESAU;tr|A0A1U7Q9J2|A0A1U7Q9J2_MESAU;tr|A0A1U8BZU1|A0A1U8BZU1_MESAU	A6NMA8;O95825;H7C3S0;C9JQD0;C9K0F7;C9JAL0;F8WF64;H7C3I5;A6NND8;A6NHJ8;O95825-2	Quinone oxidoreductase-like protein 1	CRYZL1
40735000	28583000	22118000	13618000	24520000	59478000	17153000	23128000				Homo sapiens	biological regulation;cell cycle;cell cycle phase;cell cycle process;cell division;cellular component organization;cellular component organization at cellular level;cellular component organization or biogenesis;cellular component organization or biogenesis at cellular level;cellular process;establishment of localization;G2/M transition of mitotic cell cycle;mitosis;mitotic cell cycle;negative reg…	binding;channel inhibitor activity;channel regulator activity;enzyme binding;enzyme inhibitor activity;enzyme regulator activity;ion channel inhibitor activity;phosphatase binding;phosphatase inhibitor activity;phosphatase regulator activity;potassium channel inhibitor activity;potassium channel regulator activity;protein binding;protein phosphatase 2A binding;protein phosphatase binding;protein …	cell part;cytoplasm;intracellular organelle part;intracellular part;nuclear part;nucleoplasm;organelle part	3	3	2	30.6	30.6	21.5	13.389	0	7.7142	2064000000	11	tr|A0A1U7RCJ4|A0A1U7RCJ4_MESAU;A6NMQ3;Q5T5H1;O43768-6;O43768-5;O43768-2;O43768;O43768-9;O43768-7;O43768-3;O43768-4;A0A1W2PRU0;H3BQ52;H3BTD3;H3BMD8;tr|A0A1U7RHT8|A0A1U7RHT8_MESAU;P56211-2;O43768-8	tr|A0A1U7RCJ4|A0A1U7RCJ4_MESAU;A6NMQ3;Q5T5H1;O43768-6;O43768-5;O43768-2;O43768;O43768-9;O43768-7;O43768-3;O43768-4;A0A1W2PRU0	Alpha-endosulfine	ENSA
828000	1206800	1029600	545170	2115600	1834400	652450	897410				Homo sapiens	biological regulation;biosynthetic process;cellular biosynthetic process;cellular macromolecule biosynthetic process;cellular macromolecule metabolic process;cellular metabolic process;cellular nitrogen compound metabolic process;cellular process;cellular response to stimulus;cellular response to stress;DNA metabolic process;DNA recombination;DNA repair;double-strand break repair;double-strand br…	activating transcription factor binding;binding;damaged DNA binding;DNA binding;histone binding;methylated histone residue binding;nucleic acid binding;p53 binding;protein binding;protein binding transcription factor activity;RNA polymerase II activating transcription factor binding;RNA polymerase II transcription cofactor activity;RNA polymerase II transcription factor binding;RNA polymerase II …	cell part;chromosomal part;condensed chromosome kinetochore;cytoplasm;intracellular membrane-bounded organelle;intracellular non-membrane-bounded organelle;intracellular organelle;intracellular organelle part;intracellular part;kinetochore;macromolecular complex;membrane-bounded organelle;non-membrane-bounded organelle;nuclear part;nucleoplasm;nucleus;organelle;organelle part;protein complex;repl…	3	3	3	2.4	2.4	2.4	209.02	0	5.6114	813790000	6	A6NNK5;Q12888;Q12888-3;Q12888-2;H7C3N7;C9JXV0;tr|A0A1U8BJV2|A0A1U8BJV2_MESAU;tr|A0A1U8BNM3|A0A1U8BNM3_MESAU;tr|A0A1U8BWW8|A0A1U8BWW8_MESAU;tr|A0A1U7Q4J6|A0A1U7Q4J6_MESAU	A6NNK5;Q12888;Q12888-3;Q12888-2;H7C3N7	Tumor suppressor p53-binding protein 1	TP53BP1
39654000	19502000	33696000	9064400	36602000	64871000	15387000	18900000				Homo sapiens	biological regulation;cell cycle process;cellular component organization;cellular component organization at cellular level;cellular component organization or biogenesis;cellular component organization or biogenesis at cellular level;cellular macromolecule metabolic process;cellular metabolic process;cellular process;cellular protein metabolic process;cytoskeleton organization;macromolecule metabo…	adenyl nucleotide binding;adenyl ribonucleotide binding;ATP binding;binding;catalytic activity;cis-trans isomerase activity;enzyme activator activity;enzyme binding;enzyme regulator activity;identical protein binding;isomerase activity;nucleotide binding;peptidyl-prolyl cis-trans isomerase activity;phosphatase activator activity;phosphatase binding;phosphatase regulator activity;protein binding;p…	calcium channel complex;cation channel complex;cell part;cytoplasm;extracellular membrane-bounded organelle;extracellular organelle;extracellular region part;extracellular vesicular exosome;intracellular membrane-bounded organelle;intracellular organelle;intracellular organelle part;intracellular part;ion channel complex;macromolecular complex;membrane part;membrane-bounded organelle;membrane-bou…	8	8	8	28.9	28.9	28.9	37.375	0	92.033	4150700000	38	A6PVN5;Q15257-2;Q15257;F6WIT2;Q15257-3;Q5T949;Q5T948;A6PVN9;A6PVN6;tr|A0A1U7R1I9|A0A1U7R1I9_MESAU;Q15257-4;A6PVN8;A6PVN7;Q68CR8;C9IZ76;B7ZBQ0;B7ZBP9;B7ZBP7;B4DDQ6;H0Y6E5	A6PVN5;Q15257-2;Q15257;F6WIT2;Q15257-3;Q5T949;Q5T948;A6PVN9;A6PVN6;tr|A0A1U7R1I9|A0A1U7R1I9_MESAU;Q15257-4;A6PVN8	Serine/threonine-protein phosphatase 2A activator	PPP2R4
4641600	575350	2018200	0	1524600	2508000	0	0				Homo sapiens	actin cytoskeleton organization;actin filament organization;actin filament-based process;actin nucleation;Arp2/3 complex-mediated actin nucleation;biological regulation;cellular component disassembly;cellular component disassembly at cellular level;cellular component organization;cellular component organization at cellular level;cellular component organization or biogenesis;cellular component org…	alpha-tubulin binding;binding;cytoskeletal protein binding;enzyme binding;protein binding;tubulin binding;ubiquitin protein ligase binding	autophagic vacuole;cell part;cell projection;centriole;cytoplasmic part;cytoplasmic vesicle;cytoskeletal part;early endosome;early endosome membrane;endosomal part;endosome;endosome membrane;filopodium;intracellular membrane-bounded organelle;intracellular non-membrane-bounded organelle;intracellular organelle;intracellular organelle part;intracellular part;invadopodium;lamellipodium;late endosom…	2	2	2	4.9	4.9	4.9	51.283	0.0015898	3.2997	214020000	5	tr|A0A1U8CEC3|A0A1U8CEC3_MESAU;Q9NQA3;C4AMC7;Q6VEQ5;A8K0Z3;A8MWX3	tr|A0A1U8CEC3|A0A1U8CEC3_MESAU;Q9NQA3;C4AMC7;Q6VEQ5;A8K0Z3;A8MWX3	WAS protein family homolog 6;Putative WAS protein family homolog 3;WAS protein family homolog 2;WAS protein family homolog 1;Putative WAS protein family homolog 4	WASH6P;WASH3P;WASH2P;WASH1;WASH4P
426370	0	0	199200	0	0	0	0				Homo sapiens	biological regulation;regulation of biological process;regulation of catalytic activity;regulation of endopeptidase activity;regulation of hydrolase activity;regulation of metabolic process;regulation of molecular function;regulation of peptidase activity	endopeptidase inhibitor activity;endopeptidase regulator activity;enzyme inhibitor activity;enzyme regulator activity;peptidase inhibitor activity;peptidase regulator activity;serine-type endopeptidase inhibitor activity	extracellular membrane-bounded organelle;extracellular organelle;extracellular region part;extracellular space;extracellular vesicular exosome;membrane-bounded organelle;membrane-bounded vesicle;organelle;vesicle	3	3	3	2.5	2.5	2.5	161.1	0.0026818	2.6224	117580000	3	A8K2U0;H0YH14;H0YGG5;A8K2U0-2	A8K2U0	Alpha-2-macroglobulin-like protein 1	A2ML1
77670000	19529000	42588000	724220	41273000	43087000	4086200	27096000				Homo sapiens	biological regulation;circulatory system process;multicellular organismal process;positive regulation of blood pressure;positive regulation of systemic arterial blood pressure;regulation of anatomical structure size;regulation of biological quality;regulation of blood pressure;regulation of blood vessel size;regulation of tube size;response to chemical stimulus;response to organic substance;respo…		cell part;cytoplasmic part;endoplasmic reticulum;extracellular region part;extracellular space;intracellular membrane-bounded organelle;intracellular organelle;intracellular part;membrane-bounded organelle;nucleus;organelle;perinuclear region of cytoplasm	5	5	5	24.3	24.3	24.3	21.143	0	20.925	2869000000	14	A8K878;P55145;tr|A0A1U7QAS0|A0A1U7QAS0_MESAU;H7C2D6	A8K878;P55145;tr|A0A1U7QAS0|A0A1U7QAS0_MESAU	Mesencephalic astrocyte-derived neurotrophic factor	MANF
4183100	293400	531590	1414100	2949400	3901200	4105800	305400				Homo sapiens	anatomical structure development;anatomical structure morphogenesis;biological regulation;carbohydrate metabolic process;cardiac chamber morphogenesis;cardiac left ventricle morphogenesis;cardiac ventricle morphogenesis;catabolic process;cell surface receptor linked signaling pathway;cellular carbohydrate metabolic process;cellular catabolic process;cellular glucan metabolic process;cellular macr…	adenyl nucleotide binding;adenyl ribonucleotide binding;ATP binding;binding;catalytic activity;enzyme binding;kinase activity;kinase binding;nucleotide binding;phosphotransferase activity, alcohol group as acceptor;protein binding;protein kinase A binding;protein kinase A catalytic subunit binding;protein kinase activity;protein kinase binding;protein serine/threonine kinase activity;purine nucle…	beta-catenin destruction complex;cell part;cytoplasmic part;cytosol;intracellular part;macromolecular complex;protein complex	6	6	5	17	17	14.5	44.919	0	10.984	675560000	14	A8MT37;P49840;M0QYV0;tr|A0A1U8D1G4|A0A1U8D1G4_MESAU	A8MT37;P49840;M0QYV0;tr|A0A1U8D1G4|A0A1U8D1G4_MESAU	Glycogen synthase kinase-3 alpha	GSK3A
1315000	5468100	6508300	767620	13419000	4870000	1614200	3661400				Homo sapiens	biological regulation;negative regulation of catalytic activity;negative regulation of endopeptidase activity;negative regulation of hydrolase activity;negative regulation of molecular function;negative regulation of peptidase activity;regulation of biological process;regulation of catalytic activity;regulation of endopeptidase activity;regulation of hydrolase activity;regulation of metabolic pro…	endopeptidase inhibitor activity;endopeptidase regulator activity;enzyme inhibitor activity;enzyme regulator activity;peptidase inhibitor activity;peptidase regulator activity;serine-type endopeptidase inhibitor activity	cell part;cytoplasm;extracellular region part;extracellular space;intracellular part	1	1	1	10.1	10.1	10.1	15.355	0.00034771	4.422	468610000	11	A8MTL9	A8MTL9	Serpin-like protein HMSD	HMSD
19708000	0	0	9387700	0	29671000	13552000	17027000				Homo sapiens				2	2	2	37.9	37.9	37.9	6.5442	0.0018862	3.1339	557490000	5	F8WDX0;F8WB12;F8WDS8;C9J0U9;D3YTH5;tr|A0A1U7QMG8|A0A1U7QMG8_MESAU;A8MUM1;Q53HC9	F8WDX0;F8WB12;F8WDS8;C9J0U9;D3YTH5;tr|A0A1U7QMG8|A0A1U7QMG8_MESAU;A8MUM1;Q53HC9	Protein TSSC1	TSSC1
390150016	76782000	206340000	29319000	332620000	200570000	44494000	345529984				Homo sapiens	biosynthetic process;catabolic process;cell proliferation;cellular biosynthetic process;cellular catabolic process;cellular component disassembly;cellular component disassembly at cellular level;cellular component organization;cellular component organization at cellular level;cellular component organization or biogenesis;cellular component organization or biogenesis at cellular level;cellular mac…	binding;nucleic acid binding;nucleotide binding;RNA binding;rRNA binding;structural constituent of ribosome;structural molecule activity	cell part;cytoplasm;cytoplasmic part;cytosol;cytosolic large ribosomal subunit;extracellular membrane-bounded organelle;extracellular organelle;extracellular region part;extracellular vesicular exosome;intracellular membrane-bounded organelle;intracellular non-membrane-bounded organelle;intracellular organelle;intracellular organelle part;intracellular part;large ribosomal subunit;macromolecular …	8	8	8	34.6	34.6	34.6	17.728	0	200.98	24377000000	121	tr|A0A1U7QE09|A0A1U7QE09_MESAU;H7BY10;K7EJV9;K7ERT8;A8MUS3;P62750;K7EMA7	tr|A0A1U7QE09|A0A1U7QE09_MESAU;H7BY10;K7EJV9;K7ERT8;A8MUS3;P62750;K7EMA7	60S ribosomal protein L23a	RPL23A
31399000	14691000	23766000	9714600	19089000	35030000	33109000	739390				Homo sapiens	activation of caspase activity;activation of caspase activity by cytochrome c;anatomical structure development;anatomical structure formation involved in morphogenesis;apoptosis;apoptotic mitochondrial changes;B cell homeostasis;biological regulation;catabolic process;cell death;cell differentiation;cell fate commitment;cell surface receptor linked signaling pathway;cellular catabolic process;cel…	aspartic-type endopeptidase activity;aspartic-type peptidase activity;catalytic activity;cyclin-dependent protein kinase inhibitor activity;cyclin-dependent protein kinase regulator activity;cysteine-type endopeptidase activity;cysteine-type endopeptidase activity involved in apoptotic process;cysteine-type peptidase activity;endopeptidase activity;enzyme inhibitor activity;enzyme regulator activ…	cell part;cytoplasm;cytoplasmic part;cytosol;intracellular membrane-bounded organelle;intracellular organelle;intracellular organelle part;intracellular part;membrane;membrane-bounded organelle;nuclear part;nucleoplasm;nucleus;organelle;organelle part;plasma membrane	2	2	2	16.2	16.2	16.2	13.366	0	15.642	1267000000	10	C9JXR7;A8MVM1;P42574	C9JXR7;A8MVM1;P42574	Caspase-3;Caspase-3 subunit p17;Caspase-3 subunit p12	CASP3
934600	564870	400440	0	481530	528830	0	0				Homo sapiens	anatomical structure morphogenesis;biological regulation;cellular component assembly;cellular component assembly at cellular level;cellular component movement;cellular component organization;cellular component organization at cellular level;cellular component organization or biogenesis;cellular component organization or biogenesis at cellular level;cellular localization;cellular macromolecular co…	binding;binding, bridging;cytoskeletal adaptor activity;cytoskeletal protein binding;dynactin binding;dynein binding;enzyme binding;G-protein-coupled receptor binding;GTPase binding;protein binding;protein binding, bridging;proteinase activated receptor binding;Rab GTPase binding;Ras GTPase binding;receptor binding;small GTPase binding;structural constituent of cytoskeleton;structural molecule ac…	cell part;cytoplasmic part;cytoplasmic vesicle;cytoskeleton;cytosol;extracellular region part;Golgi apparatus;Golgi apparatus part;host cell cytoplasm part;host cell part;host cell viral assembly compartment;host intracellular membrane-bounded organelle;host intracellular organelle;host intracellular part;intracellular membrane-bounded organelle;intracellular non-membrane-bounded organelle;intrac…	4	3	3	6.5	5.2	5.2	94.885	0	5.1981	589150000	12	A8MVZ6;tr|A0A1U8BUK4|A0A1U8BUK4_MESAU;Q96G01-4;Q96G01-3;Q96G01;F8VZX7;F8W056;Q96G01-2	A8MVZ6;tr|A0A1U8BUK4|A0A1U8BUK4_MESAU;Q96G01-4;Q96G01-3;Q96G01	Protein bicaudal D homolog 1	BICD1
195560000	46827000	110970000	19697000	101680000	93437000	10146000	74972000				Homo sapiens	biosynthetic process;cellular biosynthetic process;cellular component assembly;cellular component assembly at cellular level;cellular component organization;cellular component organization at cellular level;cellular component organization or biogenesis;cellular component organization or biogenesis at cellular level;cellular macromolecular complex assembly;cellular macromolecular complex subunit o…	binding;nucleic acid binding;RNA binding	catalytic step 2 spliceosome;cell part;cytoplasmic part;cytosol;intracellular organelle part;intracellular part;macromolecular complex;methylosome;methyltransferase complex;nuclear part;nucleoplasm;organelle part;protein complex;ribonucleoprotein complex;small nuclear ribonucleoprotein complex;small nucleolar ribonucleoprotein complex;SMN-Sm protein complex;spliceosomal complex;U1 snRNP;U12-type …	2	2	2	29.7	29.7	29.7	7.1013	0.0021882	3.0757	2412800000	8	Q49AN9;F5H013;tr|A0A1U7QNB4|A0A1U7QNB4_MESAU;P62308;A8MWD9;C9JVQ0	Q49AN9;F5H013;tr|A0A1U7QNB4|A0A1U7QNB4_MESAU;P62308;A8MWD9;C9JVQ0	Small nuclear ribonucleoprotein G;Putative small nuclear ribonucleoprotein G-like protein 15	SNRPG;SNRPGP15
6775500	4245900	10354000	533410	7832600	5117400	755370	4184300				Homo sapiens	cellular macromolecule metabolic process;cellular metabolic process;cellular process;cellular protein metabolic process;macromolecule metabolic process;macromolecule modification;metabolic process;post-translational protein modification;primary metabolic process;protein metabolic process;protein modification process	binding;cation binding;ion binding;metal ion binding	cell part;cytoplasmic part;endoplasmic reticulum;endoplasmic reticulum lumen;endoplasmic reticulum part;intracellular membrane-bounded organelle;intracellular organelle;intracellular organelle lumen;intracellular organelle part;intracellular part;membrane-bounded organelle;membrane-enclosed lumen;organelle;organelle lumen;organelle part	4	4	4	17.4	17.4	17.4	33.995	0	10.99	707150000	14	A8MXB9;J3KQJ1;Q8NBJ7;E9PBT8;J3QT17;C9JL30;tr|A0A1U8CCL7|A0A1U8CCL7_MESAU;H7C3B2;C9J660;Q8NBJ7-2;Q8NBJ7-5;F8WA42;Q8NBJ7-3;F8WEV7;F8WES7;F8WEX5;E9PG02;Q8NBJ7-4	A8MXB9;J3KQJ1;Q8NBJ7;E9PBT8;J3QT17;C9JL30;tr|A0A1U8CCL7|A0A1U8CCL7_MESAU;H7C3B2;C9J660;Q8NBJ7-2;Q8NBJ7-5;F8WA42;Q8NBJ7-3	Sulfatase-modifying factor 2	SUMF2
38926000	8852400	19250000	20199000	21721000	26949000	20677000	13140000				Homo sapiens	biological regulation;biosynthetic process;cellular biosynthetic process;cellular component assembly;cellular component assembly at cellular level;cellular component organization;cellular component organization at cellular level;cellular component organization or biogenesis;cellular component organization or biogenesis at cellular level;cellular macromolecular complex assembly;cellular macromolec…	binding;identical protein binding;protein binding;protein binding transcription factor activity;protein dimerization activity;protein heterodimerization activity;protein homodimerization activity;TBP-class protein binding;transcription coactivator activity;transcription cofactor activity;transcription factor binding;transcription factor binding transcription factor activity	cell junction;cell part;intracellular organelle part;intracellular part;macromolecular complex;nuclear part;nucleoplasm;nucleoplasm part;organelle part;protein complex;transcription factor complex;transcription factor TFIIA complex	1	1	1	13.2	13.2	13.2	7.7969	0.0043681	2.4297	532370000	5	A8MYR4;H0YK39;P52657	A8MYR4;H0YK39;P52657	Transcription initiation factor IIA subunit 2	GTF2A2
7069500	4258100	3456900	2357500	2466400	3470700	5471700	8616300				Homo sapiens	biological regulation;cellular process;cellular response to stimulus;regulation of biological process;regulation of cellular process;response to stimulus;signal transduction	binding;GTP binding;guanyl nucleotide binding;guanyl ribonucleotide binding;nucleotide binding;purine nucleotide binding;purine ribonucleoside triphosphate binding;purine ribonucleotide binding;ribonucleotide binding	cell part;cytoplasm;cytoplasmic part;intracellular membrane-bounded organelle;intracellular organelle;intracellular part;membrane;membrane-bounded organelle;mitochondrion;organelle	5	5	5	15.7	15.7	15.7	38.129	0	8.9008	2873600000	46	A8MZF9;tr|A0A1U7QK36|A0A1U7QK36_MESAU;P55039;J3QL90;J3KRL5;J3QR71;J3QKV7;J3QRI9;J3QKW7;J3QLF3	A8MZF9;tr|A0A1U7QK36|A0A1U7QK36_MESAU;P55039	Developmentally-regulated GTP-binding protein 2	DRG2
1388400	1028000	739510	706250	1330800	1728400	716120	1178900				Homo sapiens	adaptive immune response;adaptive immune response based on somatic recombination of immune receptors built from immunoglobulin superfamily domains;biological adhesion;cell adhesion;cell gliding;cell migration;cell motility;cell-substrate adhesion;cellular component movement;cellular process;establishment of localization;establishment of localization in cell;exocytosis;immune effector process;immu…	adenyl nucleotide binding;adenyl ribonucleotide binding;ATP binding;binding;catalytic activity;hydrolase activity;hydrolase activity, acting on acid anhydrides;hydrolase activity, acting on acid anhydrides, in phosphorus-containing anhydrides;lipid binding;motor activity;nucleoside-triphosphatase activity;nucleotide binding;phosphatidylinositol binding;phosphatidylinositol-3,4,5-trisphosphate bin…	cell part;cell projection;cytoskeletal part;extracellular membrane-bounded organelle;extracellular organelle;extracellular region part;extracellular vesicular exosome;filopodium;intracellular organelle part;intracellular part;lamellipodium;leading edge membrane;macromolecular complex;membrane;membrane part;membrane-bounded organelle;membrane-bounded vesicle;microvillus;myosin complex;organelle;or…	7	7	5	6.9	6.9	5	116.44	0	10.346	1760900000	16	B0I1T2;B0I1T2-4;B0I1T2-3;F8WEW9;B0I1T2-2	B0I1T2;B0I1T2-4	Unconventional myosin-Ig;Minor histocompatibility antigen HA-2	MYO1G
75202000	62675000	74167000	12717000	91227000	71838000	22181000	145660000				Homo sapiens	biological regulation;cellular component assembly;cellular component assembly at cellular level;cellular component organization;cellular component organization at cellular level;cellular component organization or biogenesis;cellular component organization or biogenesis at cellular level;cellular macromolecular complex assembly;cellular macromolecular complex subunit organization;cellular process;…	binding;nucleic acid binding;RNA binding;translation factor activity, nucleic acid binding;translation initiation factor activity	cell part;cytoplasmic part;eukaryotic 43S preinitiation complex;eukaryotic 48S preinitiation complex;eukaryotic translation initiation factor 3 complex;fibrillar center;intracellular organelle part;intracellular part;macromolecular complex;membrane;nuclear part;nucleolar part;nucleoplasm;organelle part;protein complex;ribonucleoprotein complex;translation preinitiation complex	24	24	24	40	40	40	70.901	0	323.31	23314000000	191	B0QY89;Q9Y262;tr|A0A1U7Q9G9|A0A1U7Q9G9_MESAU;Q9Y262-2;B0QY90;C9JHP4;C9K0Q7;H7C3A0;H0Y7E6	B0QY89;Q9Y262;tr|A0A1U7Q9G9|A0A1U7Q9G9_MESAU;Q9Y262-2;B0QY90	Eukaryotic translation initiation factor 3 subunit L	EIF3L
4120100	8747700	6184200	4449000	5815500	11609000	3140500	5124700				Homo sapiens	biological regulation;biosynthetic process;cellular biosynthetic process;cellular macromolecule biosynthetic process;cellular macromolecule metabolic process;cellular metabolic process;cellular nitrogen compound metabolic process;cellular process;macromolecule biosynthetic process;macromolecule metabolic process;metabolic process;nitrogen compound metabolic process;nucleic acid metabolic process;…	binding;cation binding;identical protein binding;ion binding;metal ion binding;nucleic acid binding;nucleotide binding;protein binding;RNA binding;transition metal ion binding;zinc ion binding	cell part;cytoplasm;intracellular membrane-bounded organelle;intracellular non-membrane-bounded organelle;intracellular organelle;intracellular organelle part;intracellular part;membrane;membrane-bounded organelle;non-membrane-bounded organelle;nuclear part;nucleolus;nucleoplasm;nucleus;organelle;organelle part;plasma membrane	4	4	4	11	11	11	64.929	0	13.78	879060000	16	B0QYK0;Q01844-6;Q01844-3;Q01844;Q01844-5;H7BY36;A0A0D9SFL3;C9JGE3;Q01844-2;tr|A0A1U8BXC2|A0A1U8BXC2_MESAU;tr|A0A1U7QMP8|A0A1U7QMP8_MESAU;tr|A0A1U8C314|A0A1U8C314_MESAU;Q01844-4	B0QYK0;Q01844-6;Q01844-3;Q01844;Q01844-5;H7BY36;A0A0D9SFL3;C9JGE3;Q01844-2	RNA-binding protein EWS	EWSR1
73981000	34703000	187760000	41686000	123280000	262040000	68841000	50339000				Homo sapiens	biological regulation;catabolic process;cell cycle phase;cell cycle process;cell division;cellular catabolic process;cellular component organization;cellular component organization at cellular level;cellular component organization or biogenesis;cellular component organization or biogenesis at cellular level;cellular macromolecule catabolic process;cellular macromolecule metabolic process;cellular…	acid-amino acid ligase activity;adenyl nucleotide binding;adenyl ribonucleotide binding;ATP binding;binding;catalytic activity;enzyme binding;ligase activity;ligase activity, forming carbon-nitrogen bonds;nucleotide binding;protein binding;protein domain specific binding;purine nucleotide binding;purine ribonucleoside triphosphate binding;purine ribonucleotide binding;ribonucleotide binding;RING-…	cell part;cell projection;chromosomal part;cytoplasm;dendrite;fibrillar center;intracellular membrane-bounded organelle;intracellular organelle;intracellular organelle part;intracellular part;membrane-bounded organelle;neuron projection;nuclear body;nuclear chromosome part;nuclear part;nucleolar part;nucleoplasm;nucleoplasm part;nucleus;organelle;organelle part;PML body;synapse;synaptonemal compl…	3	3	3	37.1	37.1	37.1	7.8891	0	10.239	3391700000	21	H3BPC4;H3BQQ9;tr|A0A1U8CMQ1|A0A1U8CMQ1_MESAU;tr|A0A1U7Q231|A0A1U7Q231_MESAU;sp|O09181|UBC9_MESAU;B0QYN7;P63279	H3BPC4;H3BQQ9;tr|A0A1U8CMQ1|A0A1U8CMQ1_MESAU;tr|A0A1U7Q231|A0A1U7Q231_MESAU;sp|O09181|UBC9_MESAU;B0QYN7;P63279	SUMO-conjugating enzyme UBC9	UBE2I
100490000	30940000	42918000	47137000	50959000	71521000	63661000	20371000				Homo sapiens	biological regulation;biosynthetic process;cellular biosynthetic process;cellular lipid metabolic process;cellular metabolic process;cellular process;cellular response to calcium ion;cellular response to chemical stimulus;cellular response to inorganic substance;cellular response to metal ion;cellular response to stimulus;establishment of localization;glycerolipid biosynthetic process;glycerolipi…	binding;calcium ion binding;calcium-dependent phospholipid binding;catalytic activity;cation binding;endopeptidase activity;hydrolase activity;identical protein binding;ion binding;lipid binding;metal ion binding;NF-kappaB binding;peptidase activity;peptidase activity, acting on L-amino acid peptides;phosphatidylserine binding;phospholipid binding;protein binding;protein dimerization activity;pro…	cell part;cytoplasm;cytoplasmic part;cytosol;extracellular membrane-bounded organelle;extracellular organelle;extracellular region part;extracellular vesicular exosome;intracellular membrane-bounded organelle;intracellular organelle;intracellular part;membrane;membrane-bounded organelle;membrane-bounded vesicle;nucleus;organelle;plasma membrane;vesicle	9	4	4	17.8	9.8	9.8	58.634	0	323.31	7607300000	29	F2Z2V0;B0QZ18;Q99829;A6PVH9;E7ENH5;Q5JX56;Q5JX58;Q5JX59;Q5JX60;Q5JX44;Q5JX55;Q5JX45;tr|A0A1U8CVR8|A0A1U8CVR8_MESAU;Q5JX54;Q5JX61;Q5JX52;Q5JX57;E7EV27;H0Y524	F2Z2V0;B0QZ18;Q99829;A6PVH9;E7ENH5;Q5JX56;Q5JX58;Q5JX59;Q5JX60;Q5JX44;Q5JX55;Q5JX45;tr|A0A1U8CVR8|A0A1U8CVR8_MESAU	Copine-1	CPNE1
0	4114500	0	0	0	0	6077400	0				Homo sapiens	biological regulation;cellular component assembly;cellular component assembly at cellular level;cellular component organization;cellular component organization at cellular level;cellular component organization or biogenesis;cellular component organization or biogenesis at cellular level;cellular macromolecular complex assembly;cellular macromolecular complex subunit organization;cellular process;…	binding;chromatin binding;DNA binding;nucleic acid binding;nucleosome binding	cell part;chromosomal part;chromosome;intracellular membrane-bounded organelle;intracellular non-membrane-bounded organelle;intracellular organelle;intracellular organelle part;intracellular part;macromolecular complex;membrane-bounded organelle;non-membrane-bounded organelle;nucleosome;nucleus;organelle;organelle part;protein-DNA complex	1	1	1	17.3	17.3	17.3	8.15	0.0088766	2.0722	50960000	1	B0QZK9;B0QZK8;X6RGJ2;Q5SSJ5-5;Q5SSJ5	B0QZK9;B0QZK8;X6RGJ2;Q5SSJ5-5;Q5SSJ5	Heterochromatin protein 1-binding protein 3	HP1BP3
0	0	0	0	0	2344200	1314600	0				Homo sapiens	gamete generation;male gamete generation;multicellular organismal process;multicellular organismal reproductive process;reproductive process;spermatogenesis		cell part;intracellular membrane-bounded organelle;intracellular organelle;intracellular organelle part;intracellular part;membrane-bounded organelle;nuclear part;nucleoplasm;nucleus;organelle;organelle part	2	2	2	9.2	9.2	9.2	30.693	0.00034376	4.2896	36587000	2	B0S8I6;Q14320;tr|A0A1U7QVQ5|A0A1U7QVQ5_MESAU	B0S8I6;Q14320;tr|A0A1U7QVQ5|A0A1U7QVQ5_MESAU	Protein FAM50A	FAM50A
58581000	254150000	421480000	39528000	188090000	87718000	10765000	101680000				Homo sapiens	acylglycerol catabolic process;acylglycerol metabolic process;alcohol metabolic process;biological regulation;carbohydrate homeostasis;catabolic process;cell surface receptor linked signaling pathway;cellular catabolic process;cellular chemical homeostasis;cellular component assembly;cellular component organization;cellular component organization or biogenesis;cellular glucose homeostasis;cellula…	binding;cholesterol binding;enzyme inhibitor activity;enzyme regulator activity;high-density lipoprotein particle receptor binding;lipase inhibitor activity;lipid binding;lipoprotein particle receptor binding;phospholipid binding;protein binding;receptor binding;steroid binding;sterol binding	cell part;chylomicron;cytoplasmic part;early endosome;endosome;extracellular membrane-bounded organelle;extracellular organelle;extracellular region;extracellular region part;extracellular space;extracellular vesicular exosome;high-density lipoprotein particle;intermediate-density lipoprotein particle;intracellular membrane-bounded organelle;intracellular organelle;intracellular part;macromolecul…	1	1	1	13.7	13.7	13.7	12.815	0	323.31	52225000000	172	B0YIW2;P02656	B0YIW2;P02656	Apolipoprotein C-III	APOC3
101770000	48685000	64031000	36745000	57901000	105620000	68184000	46041000				Homo sapiens	adult behavior;adult locomotory behavior;anatomical structure maturation;behavior;cellular component organization;cellular component organization at cellular level;cellular component organization or biogenesis;cellular component organization or biogenesis at cellular level;cellular process;cerebellar Purkinje cell layer maturation;COPI coating of Golgi vesicle;developmental maturation;development…		AP-type membrane coat adaptor complex;cell part;clathrin adaptor complex;COPI vesicle coat;cytoplasm;cytoplasmic part;cytoplasmic vesicle part;cytosol;endoplasmic reticulum;Golgi apparatus;Golgi apparatus part;intracellular membrane-bounded organelle;intracellular organelle;intracellular organelle part;intracellular part;macromolecular complex;membrane;membrane coat;membrane part;membrane-bounded…	20	20	20	39.7	39.7	39.7	61.626	0	167.7	20974000000	186	B0YIW6;P48444;P48444-2;tr|A0A1U8BQV2|A0A1U8BQV2_MESAU;Q6P1Q5;E9PK34	B0YIW6;P48444;P48444-2	Coatomer subunit delta	ARCN1
4969000	4712800	14312000	0	10505000	9367900	0	8851700				Homo sapiens	cellular component biogenesis;cellular component biogenesis at cellular level;cellular component organization or biogenesis;cellular component organization or biogenesis at cellular level;cellular macromolecule metabolic process;cellular metabolic process;cellular nitrogen compound metabolic process;cellular process;gene expression;macromolecule metabolic process;metabolic process;mRNA metabolic …	binding;box C/D snoRNA binding;nucleic acid binding;RNA binding;snoRNA binding;snRNA binding;U3 snoRNA binding;U4 snRNA binding	box C/D snoRNP complex;cell part;intracellular membrane-bounded organelle;intracellular non-membrane-bounded organelle;intracellular organelle;intracellular organelle part;intracellular part;macromolecular complex;membrane-bounded organelle;non-membrane-bounded organelle;nuclear part;nucleolar part;nucleolus;nucleoplasm;nucleus;organelle;organelle part;protein complex;ribonucleoprotein complex;sm…	2	2	2	18	18	18	14.173	0	12.343	530080000	6	tr|A0A1U7QIZ5|A0A1U7QIZ5_MESAU;B1AHD1;P55769	tr|A0A1U7QIZ5|A0A1U7QIZ5_MESAU;B1AHD1;P55769	NHP2-like protein 1;NHP2-like protein 1, N-terminally processed	NHP2L1
958970	0	2446500	0	765830	0	0	1083300				Homo sapiens	cellular component organization;cellular component organization at cellular level;cellular component organization or biogenesis;cellular component organization or biogenesis at cellular level;cellular process;embryo implantation;extracellular matrix organization;extracellular structure organization;reproductive process;viral reproduction	binding;calcium ion binding;cation binding;enzyme activator activity;enzyme regulator activity;extracellular matrix structural constituent;ion binding;metal ion binding;peptidase activator activity;peptidase regulator activity;structural molecule activity	basement membrane;extracellular matrix;extracellular matrix part;extracellular membrane-bounded organelle;extracellular organelle;extracellular region;extracellular region part;extracellular space;extracellular vesicular exosome;membrane-bounded organelle;membrane-bounded vesicle;organelle;proteinaceous extracellular matrix;vesicle	2	1	1	2.8	1.4	1.4	78.329	0	11.279	162890000	2	B1AHL2;P23142-4	B1AHL2;P23142-4	Fibulin-1	FBLN1
14693000	0	15005000	0	26433000	26035000	230860	16385000				Homo sapiens	activation of immune response;activation of innate immune response;anaphase-promoting complex-dependent proteasomal ubiquitin-dependent protein catabolic process;antigen processing and presentation;antigen processing and presentation of exogenous antigen;antigen processing and presentation of exogenous peptide antigen;antigen processing and presentation of exogenous peptide antigen via MHC class …	binding;protein binding;transcription factor binding	cell part;cytoplasm;cytoplasmic part;cytoskeleton;cytosol;intermediate filament cytoskeleton;intracellular membrane-bounded organelle;intracellular non-membrane-bounded organelle;intracellular organelle;intracellular organelle part;intracellular part;macromolecular complex;membrane-bounded organelle;non-membrane-bounded organelle;nuclear part;nucleoplasm;nucleus;organelle;organelle part;proteasom…	2	2	2	9.7	9.7	9.7	20.217	0.00067024	3.9305	1046800000	13	B1AJY5;B1AJY7;tr|A0A1U7QZJ3|A0A1U7QZJ3_MESAU;O75832;B1AJY6;tr|A0A1U8CEB3|A0A1U8CEB3_MESAU;O75832-2	B1AJY5;B1AJY7;tr|A0A1U7QZJ3|A0A1U7QZJ3_MESAU;O75832;B1AJY6;tr|A0A1U8CEB3|A0A1U8CEB3_MESAU;O75832-2	26S proteasome non-ATPase regulatory subunit 10	PSMD10
10329000	1459300	5467200	3134700	2589800	0	5387600	2832800				Homo sapiens	cell cycle;cell projection organization;cellular component organization;cellular component organization at cellular level;cellular component organization or biogenesis;cellular component organization or biogenesis at cellular level;cellular localization;cellular macromolecule localization;cellular process;cellular protein localization;centriole-centriole cohesion;centrosome organization;localizat…	binding;cytoskeletal protein binding;kinesin binding;protein binding;structural molecule activity	actin cytoskeleton;cell part;cell projection part;centriole;centrosome;ciliary rootlet;cilium part;cytoplasm;cytoplasmic part;cytoskeletal part;cytoskeleton;extracellular membrane-bounded organelle;extracellular organelle;extracellular region part;extracellular vesicular exosome;intracellular non-membrane-bounded organelle;intracellular organelle;intracellular organelle part;intracellular part;me…	2	2	1	1.3	1.3	0.7	149.06	0.004909	2.3828	2340100000	9	B1AKD8;Q5TZA2-2;Q5TZA2	B1AKD8;Q5TZA2-2;Q5TZA2	Rootletin	CROCC
34083000	15580000	17856000	7096100	13652000	40228000	25809000	9231200				Homo sapiens	biological regulation;cell migration;cell motility;cell proliferation;cellular component movement;cellular component organization;cellular component organization or biogenesis;cellular process;locomotion;macromolecule metabolic process;metabolic process;neuromuscular junction development;positive regulation of biological process;positive regulation of catabolic process;positive regulation of cell…	binding;catalytic activity;cation binding;endopeptidase activity;epidermal growth factor binding;growth factor binding;hormone binding;hydrolase activity;ion binding;metal ion binding;metalloendopeptidase activity;metallopeptidase activity;peptidase activity;peptidase activity, acting on L-amino acid peptides;protein binding	cell part;cell surface;cytoplasmic part;cytosol;intracellular membrane-bounded organelle;intracellular organelle;intracellular part;membrane-bounded organelle;mitochondrion;organelle	20	20	20	21.5	21.5	21.5	125.12	0	137.77	7527200000	85	G3V1R5;B1AKJ5;O43847;O43847-2;F5H7V1;tr|A0A1U7QQ52|A0A1U7QQ52_MESAU;H0Y5G9	G3V1R5;B1AKJ5;O43847;O43847-2;F5H7V1;tr|A0A1U7QQ52|A0A1U7QQ52_MESAU;H0Y5G9	Nardilysin	NRD1
1692300	0	3382900	1204800	8305900	5036900	2970800	1308600				Homo sapiens	biological regulation;cellular macromolecule metabolic process;cellular metabolic process;cellular process;cellular protein metabolic process;macromolecule metabolic process;metabolic process;posttranscriptional regulation of gene expression;primary metabolic process;protein folding;protein metabolic process;protein stabilization;regulation of biological process;regulation of biological quality;r…	binding;chaperone binding;heat shock protein binding;protein binding;unfolded protein binding	cell part;cytoplasm;intracellular part	2	2	2	10.3	10.3	10.3	30.143	0.0021283	2.8201	349450000	2	tr|A0A1U7Q2R0|A0A1U7Q2R0_MESAU;B1AL69;Q7L3B6	tr|A0A1U7Q2R0|A0A1U7Q2R0_MESAU;B1AL69;Q7L3B6	Hsp90 co-chaperone Cdc37-like 1	CDC37L1
506830	2477000	627460	193920	2438600	3244000	1282300	1859600				Homo sapiens	axon guidance;biological regulation;cell differentiation;cell junction assembly;cell junction organization;cell projection assembly;cell projection organization;cell surface receptor linked signaling pathway;cell-substrate junction assembly;cellular component assembly;cellular component assembly at cellular level;cellular component organization;cellular component organization at cellular level;ce…	binding;enzyme binding;enzyme regulator activity;GTPase regulator activity;guanyl-nucleotide exchange factor activity;kinase binding;nucleoside-triphosphatase regulator activity;protein binding;protein kinase binding;Ras guanyl-nucleotide exchange factor activity;Rho guanyl-nucleotide exchange factor activity;small GTPase regulator activity	adherens junction;anchoring junction;cell body;cell cortex;cell junction;cell part;cell projection;cell-substrate adherens junction;cell-substrate junction;cytoplasmic part;cytosol;focal adhesion;intracellular part;lamellipodium;macromolecular complex;neuron projection;neuronal cell body;protein complex;ruffle	5	5	3	6.8	6.8	5	79.831	0	26.454	651760000	10	B1ALK7;Q14155-1;Q14155-5;E9PDQ5;tr|A0A1U8BYM8|A0A1U8BYM8_MESAU;tr|A0A1U8C6M1|A0A1U8C6M1_MESAU;tr|A0A1U8C635|A0A1U8C635_MESAU;tr|A0A1U8BVE8|A0A1U8BVE8_MESAU;tr|A0A1U8BVF0|A0A1U8BVF0_MESAU;tr|A0A1U7QUK4|A0A1U7QUK4_MESAU;tr|A0A1U8BYM3|A0A1U8BYM3_MESAU;Q14155-6;Q14155-2;Q14155-3;Q14155;E7EUY6;tr|A0A1U8BVF6|A0A1U8BVF6_MESAU	B1ALK7;Q14155-1;Q14155-5;E9PDQ5;tr|A0A1U8BYM8|A0A1U8BYM8_MESAU;tr|A0A1U8C6M1|A0A1U8C6M1_MESAU;tr|A0A1U8C635|A0A1U8C635_MESAU;tr|A0A1U8BVE8|A0A1U8BVE8_MESAU;tr|A0A1U8BVF0|A0A1U8BVF0_MESAU;tr|A0A1U7QUK4|A0A1U7QUK4_MESAU;tr|A0A1U8BYM3|A0A1U8BYM3_MESAU;Q14155-6;Q14155-2;Q14155-3;Q14155	Rho guanine nucleotide exchange factor 7	ARHGEF7
1857400	639740	1111700	499160	757140	1200400	0	0				Homo sapiens	cellular process;cytokinesis;viral reproduction	binding;GTP binding;guanyl nucleotide binding;guanyl ribonucleotide binding;nucleotide binding;purine nucleotide binding;purine ribonucleoside triphosphate binding;purine ribonucleotide binding;ribonucleotide binding	axon part;axon terminus;cell cortex part;cell division site part;cell part;cell projection part;chromosomal part;clathrin-coated vesicle;cleavage furrow;coated vesicle;condensed chromosome kinetochore;cytoplasmic membrane-bounded vesicle;cytoplasmic part;cytoplasmic vesicle;cytoskeletal part;intracellular membrane-bounded organelle;intracellular non-membrane-bounded organelle;intracellular organe…	5	2	2	17.6	9.3	9.3	49.303	0	7.5765	219730000	6	B1AMS2;Q14141-2;Q14141-4;Q14141;tr|A0A1U7RAM4|A0A1U7RAM4_MESAU;tr|A0A1U7R896|A0A1U7R896_MESAU;Q14141-3	B1AMS2;Q14141-2;Q14141-4;Q14141;tr|A0A1U7RAM4|A0A1U7RAM4_MESAU;tr|A0A1U7R896|A0A1U7R896_MESAU	Septin-6	2021-09-06
9357400	17739000	11348000	6779700	35607000	14931000	10286000	6603800				Homo sapiens	2'-deoxyribonucleotide biosynthetic process;2'-deoxyribonucleotide metabolic process;alcohol metabolic process;ATP metabolic process;biosynthetic process;carbohydrate metabolic process;cellular biosynthetic process;cellular carbohydrate metabolic process;cellular metabolic process;cellular nitrogen compound biosynthetic process;cellular nitrogen compound metabolic process;cellular process;dATP me…	adenyl nucleotide binding;adenyl ribonucleotide binding;ATP binding;binding;catalytic activity;guanylate kinase activity;kinase activity;nucleobase-containing compound kinase activity;nucleotide binding;nucleotide kinase activity;phosphotransferase activity, phosphate group as acceptor;purine nucleotide binding;purine ribonucleoside triphosphate binding;purine ribonucleotide binding;ribonucleotid…	cell part;cytoplasmic part;cytosol;intracellular part	3	3	2	22.6	22.6	16.6	21.999	0	8.4984	1397400000	17	B1ANH5;B1ANH0;B1ANG9;B1ANH2;Q16774;Q16774-2;Q16774-3;B1ANH6;B1ANH3	B1ANH5;B1ANH0;B1ANG9;B1ANH2;Q16774;Q16774-2;Q16774-3;B1ANH6;B1ANH3	Guanylate kinase	GUK1
17847000	30509000	29517000	18720000	27590000	64807000	21509000	24266000				Homo sapiens	apoptosis;biological regulation;catabolic process;cell death;cellular catabolic process;cellular macromolecule catabolic process;cellular macromolecule metabolic process;cellular metabolic process;cellular process;cytoplasmic sequestering of NF-kappaB;cytoplasmic sequestering of protein;cytoplasmic sequestering of transcription factor;death;macromolecule catabolic process;macromolecule metabolic …	binding;enzyme binding;enzyme regulator activity;heat shock protein binding;kinase binding;kinase regulator activity;NF-kappaB binding;protein binding;protein kinase binding;protein kinase regulator activity;small conjugating protein binding;transcription factor binding;ubiquitin binding;ubiquitin protein ligase binding	CD95 death-inducing signaling complex;Cdc48p-Npl4p-Ufd1p AAA ATPase complex;cell part;cytoplasmic part;cytosol;death-inducing signaling complex;endoplasmic reticulum part;envelope;intracellular membrane-bounded organelle;intracellular organelle;intracellular organelle part;intracellular part;macromolecular complex;membrane part;membrane-bounded organelle;nuclear envelope;nuclear part;nucleus;orga…	12	12	12	30.2	30.2	30.2	55.998	0	92.135	5098100000	45	B1ANM7;Q9UNN5-2;Q9UNN5;B3KT28;tr|A0A1U8C416|A0A1U8C416_MESAU	B1ANM7;Q9UNN5-2;Q9UNN5;B3KT28;tr|A0A1U8C416|A0A1U8C416_MESAU	FAS-associated factor 1	FAF1
0	0	0	0	0	0	0	2237100				Homo sapiens	3'-UTR-mediated mRNA stabilization;ATP-dependent chromatin remodeling;biological regulation;cell differentiation;cellular component organization;cellular component organization at cellular level;cellular component organization or biogenesis;cellular component organization or biogenesis at cellular level;cellular developmental process;cellular macromolecule metabolic process;cellular metabolic pro…	binding;chromatin binding;chromatin DNA binding;core promoter proximal region DNA binding;core promoter proximal region sequence-specific DNA binding;DNA binding;enhancer binding;enhancer sequence-specific DNA binding;identical protein binding;mRNA 3'-UTR binding;mRNA binding;nucleic acid binding;nucleosomal DNA binding;nucleosome binding;nucleotide binding;poly(U) RNA binding;poly-pyrimidine tra…	catalytic step 2 spliceosome;cell part;chromatin;chromosomal part;cytoplasmic part;cytosol;extracellular membrane-bounded organelle;extracellular organelle;extracellular region part;extracellular vesicular exosome;intracellular membrane-bounded organelle;intracellular organelle;intracellular organelle part;intracellular part;macromolecular complex;membrane;membrane-bounded organelle;membrane-boun…	13	1	1	43.5	6.9	6.9	28.916	0	24.712	91686000	7	G3V4W0;B4DY08;B2R5W2;G3V4C1;P07910-2;tr|A0A1U7R3Z8|A0A1U7R3Z8_MESAU;tr|A0A1U8CPF6|A0A1U8CPF6_MESAU;tr|A0A1U7QVU3|A0A1U7QVU3_MESAU;P07910-4;tr|A0A1U8CSG3|A0A1U8CSG3_MESAU;tr|A0A1U7R6G4|A0A1U7R6G4_MESAU;tr|A0A1U8D1D9|A0A1U8D1D9_MESAU;G3V5X6;G3V3K6;G3V251;G3V2D6;P07910-3;B4DSU6;G3V5V7;A0A0G2JPF8;A0A0G2JNQ3;P0DMR1;O60812;B7ZW38;B2RXH8;G3V4M8;G3V2H6;E5RG71;tr|A0A1U8BJE6|A0A1U8BJE6_MESAU;B3KT61;tr|A0A1…	G3V4W0;B4DY08;B2R5W2;G3V4C1;P07910-2;tr|A0A1U7R3Z8|A0A1U7R3Z8_MESAU;tr|A0A1U8CPF6|A0A1U8CPF6_MESAU;tr|A0A1U7QVU3|A0A1U7QVU3_MESAU;P07910-4;tr|A0A1U8CSG3|A0A1U8CSG3_MESAU;tr|A0A1U7R6G4|A0A1U7R6G4_MESAU;tr|A0A1U8D1D9|A0A1U8D1D9_MESAU;G3V5X6;G3V3K6;G3V251;G3V2D6;P07910-3	Heterogeneous nuclear ribonucleoproteins C1/C2	HNRNPC
5080300	5433900	6869600	441470	11112000	13667000	2342000	3857600				Homo sapiens	anatomical structure development;anatomical structure formation involved in morphogenesis;angiogenesis;biological regulation;biosynthetic process;cell activation;cell development;cell differentiation;cell recognition;cell surface receptor linked signaling pathway;cellular biosynthetic process;cellular component organization;cellular component organization at cellular level;cellular component orga…	binding;catalytic activity;cation binding;demethylase activity;histone demethylase activity;histone demethylase activity (H3-R2 specific);histone demethylase activity (H4-R3 specific);identical protein binding;ion binding;iron ion binding;metal ion binding;nucleic acid binding;oxidoreductase activity;oxidoreductase activity, acting on paired donors, with incorporation or reduction of molecular ox…	cell part;intracellular membrane-bounded organelle;intracellular non-membrane-bounded organelle;intracellular organelle;intracellular organelle part;intracellular part;membrane;membrane-bounded organelle;non-membrane-bounded organelle;nuclear part;nucleolus;nucleoplasm;nucleus;organelle;organelle part;plasma membrane	7	7	7	25.4	25.4	25.4	39.241	0	17.277	800200000	17	B2WTI3;B2WTI4;K7EJU9;Q6NYC1-2;Q6NYC1;Q6NYC1-3;tr|A0A1U8BNK3|A0A1U8BNK3_MESAU;tr|A0A1U8BS82|A0A1U8BS82_MESAU;tr|A0A1U7QNP0|A0A1U7QNP0_MESAU	B2WTI3;B2WTI4;K7EJU9;Q6NYC1-2;Q6NYC1;Q6NYC1-3;tr|A0A1U8BNK3|A0A1U8BNK3_MESAU;tr|A0A1U8BS82|A0A1U8BS82_MESAU;tr|A0A1U7QNP0|A0A1U7QNP0_MESAU	Bifunctional arginine demethylase and lysyl-hydroxylase JMJD6	JMJD6
2958600	0	0	2006800	2637200	2399100	6136900	1224900				Homo sapiens	biological regulation;biosynthetic process;cellular biosynthetic process;cellular macromolecule biosynthetic process;cellular macromolecule metabolic process;cellular metabolic process;cellular nitrogen compound metabolic process;cellular process;establishment of localization;macromolecule biosynthetic process;macromolecule metabolic process;metabolic process;nitrogen compound metabolic process;n…	binding;lipid binding;phospholipid binding;transporter activity;vitamin binding;vitamin E binding	cell part;cytoplasm;extracellular membrane-bounded organelle;extracellular organelle;extracellular region part;extracellular vesicular exosome;integral to membrane;intracellular membrane-bounded organelle;intracellular organelle;intracellular part;intrinsic to membrane;membrane part;membrane-bounded organelle;membrane-bounded vesicle;nucleus;organelle;vesicle	4	4	4	13.1	13.1	13.1	37.455	0	7.7711	2063600000	9	B3KRD8;O76054-5;O76054;H7C417;tr|A0A1U7Q9S3|A0A1U7Q9S3_MESAU;O76054-4	B3KRD8;O76054-5;O76054;H7C417;tr|A0A1U7Q9S3|A0A1U7Q9S3_MESAU;O76054-4	SEC14-like protein 2	SEC14L2
9627400	6119300	11244000	7540200	15178000	15365000	7830400	7357900				Homo sapiens	apoptosis;biological regulation;cell death;cell surface receptor linked signaling pathway;cellular component disassembly;cellular component disassembly at cellular level;cellular component disassembly involved in apoptosis;cellular component organization;cellular component organization at cellular level;cellular component organization or biogenesis;cellular component organization or biogenesis at…	acetylcholine receptor regulator activity;alpha-tubulin binding;binding;CAAX-protein geranylgeranyltransferase activity;catalytic activity;cytoskeletal protein binding;microtubule binding;prenyltransferase activity;protein binding;protein farnesyltransferase activity;protein geranylgeranyltransferase activity;protein prenyltransferase activity;Rab geranylgeranyltransferase activity;receptor regul…	CAAX-protein geranylgeranyltransferase complex;cell part;cytoplasm;cytoplasmic part;cytoskeletal part;cytosol;intracellular organelle part;intracellular part;macromolecular complex;microtubule associated complex;organelle part;protein complex;protein farnesyltransferase complex	6	6	6	30.3	30.3	30.3	27.443	0	323.31	1406800000	21	B3KVN2;E9PQP6;P49354-2;P49354;E9PPM9;H0YCW1;tr|A0A1U8BIZ7|A0A1U8BIZ7_MESAU	B3KVN2;E9PQP6;P49354-2;P49354;E9PPM9;H0YCW1	Protein farnesyltransferase/geranylgeranyltransferase type-1 subunit alpha	FNTA
9638900	1164600	1215300	6075200	10805000	15666000	7629400	959800				Homo sapiens	actin cytoskeleton organization;actin filament-based process;actomyosin structure organization;anatomical structure development;biological regulation;cellular component organization;cellular component organization at cellular level;cellular component organization or biogenesis;cellular component organization or biogenesis at cellular level;cellular process;cellular response to abiotic stimulus;ce…	actin binding;binding;cytoskeletal protein binding;protein binding	actin filament bundle;actomyosin;adherens junction;anchoring junction;cell junction;cell part;cell-cell junction;cell-substrate adherens junction;cell-substrate junction;cytoskeletal part;cytoskeleton;extracellular membrane-bounded organelle;extracellular organelle;extracellular region part;extracellular vesicular exosome;focal adhesion;intracellular non-membrane-bounded organelle;intracellular o…	4	3	3	17.1	13.4	13.4	32.616	0	6.4371	1013000000	5	B4DDF4;B4DUT8;Q99439;A0A087X271;A0A087X1X5;tr|A0A1U7R0V9|A0A1U7R0V9_MESAU;Q99439-2;K7ES69;H3BVI6;A0A087WV51;H3BQH0	B4DDF4;B4DUT8;Q99439;A0A087X271;A0A087X1X5;tr|A0A1U7R0V9|A0A1U7R0V9_MESAU;Q99439-2;K7ES69;H3BVI6	Calponin;Calponin-2	CNN2
0	0	6654500	0	3182300	13441000	0	6367700				Homo sapiens	biological regulation;biosynthetic process;cellular biosynthetic process;cellular component organization;cellular component organization at cellular level;cellular component organization or biogenesis;cellular component organization or biogenesis at cellular level;cellular macromolecule biosynthetic process;cellular macromolecule metabolic process;cellular metabolic process;cellular nitrogen comp…	binding;DNA binding;histone binding;nucleic acid binding;protein binding	cell part;contractile fiber;cytoplasmic part;intracellular membrane-bounded organelle;intracellular non-membrane-bounded organelle;intracellular organelle;intracellular part;membrane-bounded organelle;non-membrane-bounded organelle;nucleus;organelle	2	2	2	16.7	16.7	16.7	17.78	0.00035714	4.8918	266810000	4	H0Y993;B4DFG0;P35659-2;P35659	H0Y993;B4DFG0;P35659-2;P35659	Protein DEK	DEK
2407100	246090	1865400	0	751720	2385400	1591700	0				Homo sapiens	cellular component organization;cellular component organization or biogenesis;cellular membrane organization;cellular process;endocytosis;establishment of localization;establishment of protein localization;membrane invagination;membrane organization;protein transport;transport;vesicle-mediated transport	enzyme activator activity;enzyme regulator activity;GTPase activator activity;GTPase regulator activity;nucleoside-triphosphatase regulator activity	cell part;cytoplasm;cytoplasmic part;early endosome;endosome;intracellular membrane-bounded organelle;intracellular organelle;intracellular part;membrane-bounded organelle;organelle	2	2	2	5	5	5	56.112	0.00067069	3.935	254950000	7	B4DHR0;Q9H5N1-2;Q9H5N1	B4DHR0;Q9H5N1-2;Q9H5N1	Rab GTPase-binding effector protein 2	RABEP2
28838000	37933000	50604000	10833000	95177000	56555000	17522000	41366000				Homo sapiens	acetyl-CoA catabolic process;acetyl-CoA metabolic process;carbohydrate metabolic process;catabolic process;cellular carbohydrate metabolic process;cellular catabolic process;cellular metabolic process;cellular process;coenzyme catabolic process;coenzyme metabolic process;cofactor catabolic process;cofactor metabolic process;metabolic process;primary metabolic process;small molecule metabolic proc…	catalytic activity;citrate (Si)-synthase activity;transferase activity;transferase activity, transferring acyl groups;transferase activity, transferring acyl groups, acyl groups converted into alkyl on transfer	cell part;cytoplasmic part;extracellular membrane-bounded organelle;extracellular organelle;extracellular region part;extracellular vesicular exosome;intracellular membrane-bounded organelle;intracellular organelle;intracellular organelle lumen;intracellular organelle part;intracellular part;membrane-bounded organelle;membrane-bounded vesicle;membrane-enclosed lumen;mitochondrial matrix;mitochond…	11	11	10	32	32	30	50.431	0	70.967	7649200000	59	B4DJV2;O75390;A0A0C4DGI3;tr|A0A1U7QV33|A0A1U7QV33_MESAU;H0YIC4;H0YH82;F8VPF9;F8VPA1;F8VR34;F8VTT8;F8W1S4;F8W4S1;F8VRP1;F8VX68;F8VRI6;F8VU34;sp|Q0QEL7|CISY_MESAU;F8W642;F8W0J2;F8VZK9;F8VX07;F8VWQ5	B4DJV2;O75390;A0A0C4DGI3	Citrate synthase;Citrate synthase, mitochondrial	CS
8611100	0	2858500	1411800	2211800	4409600	1961300	2388300				Homo sapiens	activation of immune response;antigen receptor-mediated signaling pathway;biological regulation;catabolic process;cell surface receptor linked signaling pathway;cellular catabolic process;cellular macromolecule catabolic process;cellular macromolecule metabolic process;cellular metabolic process;cellular process;cellular protein metabolic process;cellular response to stimulus;immune response-acti…	acid-amino acid ligase activity;binding;catalytic activity;cation binding;ion binding;ligase activity;ligase activity, forming carbon-nitrogen bonds;metal ion binding;protein binding;small conjugating protein binding;small conjugating protein ligase activity;transition metal ion binding;ubiquitin binding;ubiquitin-protein ligase activity;zinc ion binding	cell part;intracellular part;LUBAC complex;macromolecular complex;protein complex;ubiquitin ligase complex	2	2	2	11.4	11.4	11.4	28.306	0.00067568	4.0462	1041500000	3	H0Y4S7;B4DML5;G3XAG9;Q9BYM8-4;Q9BYM8-3;Q9BYM8	H0Y4S7;B4DML5;G3XAG9;Q9BYM8-4;Q9BYM8-3;Q9BYM8	RanBP-type and C3HC4-type zinc finger-containing protein 1	RBCK1
0	1673300	2279700	0	4528900	5883600	0	4757800				Homo sapiens	anatomical structure development;biological adhesion;biological regulation;cell adhesion;cell cycle;cell development;cell division;cell maturation;cellular component organization;cellular component organization at cellular level;cellular component organization or biogenesis;cellular component organization or biogenesis at cellular level;cellular developmental process;cellular process;cytoskeleton…	actin binding;binding;cytoskeletal protein binding;protein binding	actomyosin contractile ring;cell cortex part;cell division site part;cell part;contractile ring;cytoplasm;cytoplasmic part;cytoskeletal part;cytoskeleton;integral to membrane;integral to plasma membrane;intracellular membrane-bounded organelle;intracellular non-membrane-bounded organelle;intracellular organelle;intracellular organelle part;intracellular part;intrinsic to membrane;intrinsic to pla…	3	3	3	9.8	9.8	9.8	39.782	0	9.2157	581420000	8	B4DQT1;B4DVN3;E7ESC7;Q7L5Y9-3;Q7L5Y9-2;Q7L5Y9;tr|A0A1U7QXW8|A0A1U7QXW8_MESAU;D6RE80;D6RIB6;Q7L5Y9-4	B4DQT1;B4DVN3;E7ESC7;Q7L5Y9-3;Q7L5Y9-2;Q7L5Y9;tr|A0A1U7QXW8|A0A1U7QXW8_MESAU;D6RE80	THP1 φ hage erythroblast attacher	MAEA
29307000	8593400	14538000	5026000	8953500	9152900	11325000	3308300				Homo sapiens	activation of protein kinase activity;apoptosis;biological regulation;cell death;cellular component disassembly;cellular component disassembly at cellular level;cellular component disassembly involved in apoptosis;cellular component organization;cellular component organization at cellular level;cellular component organization or biogenesis;cellular component organization or biogenesis at cellular…	adenyl nucleotide binding;adenyl ribonucleotide binding;ATP binding;binding;catalytic activity;cation binding;ion binding;kinase activity;metal ion binding;nucleotide binding;phosphotransferase activity, alcohol group as acceptor;protein kinase activity;protein serine/threonine kinase activity;purine nucleotide binding;purine ribonucleoside triphosphate binding;purine ribonucleotide binding;ribon…	cell part;cytoplasm;cytoplasmic part;cytosol;extracellular membrane-bounded organelle;extracellular organelle;extracellular region part;extracellular vesicular exosome;intracellular membrane-bounded organelle;intracellular non-membrane-bounded organelle;intracellular organelle;intracellular organelle part;intracellular part;membrane;membrane-bounded organelle;membrane-bounded vesicle;non-membrane…	9	9	4	26.7	26.7	14.1	45.835	0	32.301	2924200000	39	B4DR80;Q9Y6E0-2;H0Y630;tr|A0A1U7QUK5|A0A1U7QUK5_MESAU;Q9Y6E0;tr|A0A1U7R4U4|A0A1U7R4U4_MESAU;Q5JV99;Q5JV98	B4DR80;Q9Y6E0-2;H0Y630;tr|A0A1U7QUK5|A0A1U7QUK5_MESAU;Q9Y6E0;tr|A0A1U7R4U4|A0A1U7R4U4_MESAU	Serine/threonine-protein kinase 24;Serine/threonine-protein kinase 24 36 kDa subunit;Serine/threonine-protein kinase 24 12 kDa subunit	STK24
7667599872	7447699968	8274899968	4150599936	7991199744	9923200000	3475300096	6003299840				Homo sapiens	activation of immune response;activation of innate immune response;activation of MAPK activity;adipose tissue development;alcohol metabolic process;anaphase-promoting complex-dependent proteasomal ubiquitin-dependent protein catabolic process;anatomical structure development;anatomical structure morphogenesis;antigen processing and presentation;antigen processing and presentation of exogenous ant…	binding;cation binding;enzyme binding;ion binding;metal ion binding;protease binding;protein binding;structural constituent of ribosome;structural molecule activity	cell body;cell part;cell projection;cytoplasm;cytoplasmic part;cytoplasmic vesicle membrane;cytoplasmic vesicle part;cytosol;cytosolic large ribosomal subunit;cytosolic small ribosomal subunit;endocytic vesicle membrane;endosomal part;endosome membrane;extracellular membrane-bounded organelle;extracellular organelle;extracellular region part;extracellular vesicular exosome;intracellular membrane-…	8	8	8	75.3	75.3	75.3	8.7279	0	323.31	309560000000	589	tr|A0A1U8BTM1|A0A1U8BTM1_MESAU;J3QS39;J3QTR3;F5H6Q2;tr|A0A1U7R573|A0A1U7R573_MESAU;F5GYU3;F5H2Z3;F5H265;B4DV12;F5H388;tr|A0A1U7QM01|A0A1U7QM01_MESAU;F5H747;F5GXK7;J3QKN0;Q5PY61;Q96C32;P62987;P62979;P0CG47;P0CG48;M0R1V7;Q49A90;J3QSA3;F5GZ39;M0R1M6;M0R2S1;tr|A0A1U7QT71|A0A1U7QT71_MESAU	tr|A0A1U8BTM1|A0A1U8BTM1_MESAU;J3QS39;J3QTR3;F5H6Q2;tr|A0A1U7R573|A0A1U7R573_MESAU;F5GYU3;F5H2Z3;F5H265;B4DV12;F5H388;tr|A0A1U7QM01|A0A1U7QM01_MESAU;F5H747;F5GXK7;J3QKN0;Q5PY61;Q96C32;P62987;P62979;P0CG47;P0CG48;M0R1V7;Q49A90;J3QSA3;F5GZ39;M0R1M6;M0R2S1	Ubiquitin-60S ribosomal protein L40;Ubiquitin;60S ribosomal protein L40;Ubiquitin-40S ribosomal protein S27a;Ubiquitin;40S ribosomal protein S27a;Polyubiquitin-B;Ubiquitin;Polyubiquitin-C;Ubiquitin	UBB;RPS27A;UBC;UBA52
0	0	0	0	466210	2267200	0	0				Homo sapiens	anatomical structure development;apoptosis;biological regulation;cell death;cell differentiation;cellular developmental process;cellular process;death;developmental process;muscle organ development;muscle structure development;negative regulation of biological process;negative regulation of biosynthetic process;negative regulation of cellular biosynthetic process;negative regulation of cellular m…	binding;G-quadruplex RNA binding;mRNA 3'-UTR binding;mRNA binding;nucleic acid binding;RNA binding	cell part;contractile fiber part;costamere;cytoplasm;cytoplasmic part;intracellular non-membrane-bounded organelle;intracellular organelle;intracellular organelle part;intracellular part;macromolecular complex;membrane;non-membrane-bounded organelle;nuclear part;nucleolus;organelle;organelle part;polysome;ribonucleoprotein complex	3	3	3	7.9	7.9	7.9	50.99	0	7.2333	1027800000	4	E7EU85;E9PFF5;tr|A0A1U8BZ10|A0A1U8BZ10_MESAU;B4DXZ6;tr|A0A1U7QAP8|A0A1U7QAP8_MESAU;tr|A0A1U7Q5E2|A0A1U7Q5E2_MESAU;tr|A0A1U8BMW8|A0A1U8BMW8_MESAU;tr|A0A1U7QCZ1|A0A1U7QCZ1_MESAU;P51114-3;P51114-2;P51114;C9JZE0;C9JY20;tr|A0A1U8CYW1|A0A1U8CYW1_MESAU;R9WNI0;A8MQB8;G3V0J0;tr|A0A1U7QA41|A0A1U7QA41_MESAU;Q06787-8;Q06787-6;Q06787-2;Q06787-4;Q06787-5;Q06787-9;Q06787-7;Q06787-3;Q06787;P51116	E7EU85;E9PFF5;tr|A0A1U8BZ10|A0A1U8BZ10_MESAU;B4DXZ6;tr|A0A1U7QAP8|A0A1U7QAP8_MESAU;tr|A0A1U7Q5E2|A0A1U7Q5E2_MESAU;tr|A0A1U8BMW8|A0A1U8BMW8_MESAU;tr|A0A1U7QCZ1|A0A1U7QCZ1_MESAU;P51114-3;P51114-2;P51114	Fragile X mental retardation syndrome-related protein 1	FXR1
111450000	155870000	238100000	12322000	252550000	217010000	14628000	221010000				Homo sapiens	biological regulation;biosynthetic process;cellular biosynthetic process;cellular macromolecule biosynthetic process;cellular macromolecule metabolic process;cellular metabolic process;cellular nitrogen compound metabolic process;cellular process;immune response;immune system process;macromolecule biosynthetic process;macromolecule metabolic process;metabolic process;nitrogen compound metabolic p…	adenyl nucleotide binding;adenyl ribonucleotide binding;ATP binding;binding;catalytic activity;DNA binding;double-stranded RNA binding;nucleic acid binding;nucleotide binding;purine nucleotide binding;purine ribonucleoside triphosphate binding;purine ribonucleotide binding;ribonucleotide binding;RNA binding;transferase activity	cell part;cytoplasm;intracellular membrane-bounded organelle;intracellular non-membrane-bounded organelle;intracellular organelle;intracellular organelle part;intracellular part;macromolecular complex;membrane;membrane-bounded organelle;non-membrane-bounded organelle;nuclear part;nucleolus;nucleoplasm;nucleus;organelle;organelle part;ribonucleoprotein complex	13	13	13	43.5	43.5	43.5	38.91	0	245.74	25612000000	214	B4DY09;tr|A0A1U7R661|A0A1U7R661_MESAU;Q12905;X6R6Z1;A0A0A0MRL0	B4DY09;tr|A0A1U7R661|A0A1U7R661_MESAU;Q12905	Interleukin enhancer-binding factor 2	ILF2
5471500	3972100	6262400	1536400	829330	3678600	4350300	0				Homo sapiens	activation of protein kinase activity;apoptosis;biological regulation;cell death;cell projection assembly;cell projection organization;cellular component assembly;cellular component assembly at cellular level;cellular component disassembly;cellular component disassembly at cellular level;cellular component disassembly involved in apoptosis;cellular component organization;cellular component organi…	adenyl nucleotide binding;adenyl ribonucleotide binding;ATP binding;binding;catalytic activity;cation binding;identical protein binding;ion binding;kinase activity;magnesium ion binding;metal ion binding;nucleotide binding;phosphotransferase activity, alcohol group as acceptor;protein binding;protein dimerization activity;protein homodimerization activity;protein kinase activity;protein serine/th…	apical plasma membrane;cell part;cell periphery;centrosome;cytoplasm;cytoplasmic membrane-bounded vesicle;cytoplasmic part;cytoplasmic vesicle;cytoskeletal part;cytosol;extracellular membrane-bounded organelle;extracellular organelle;extracellular region part;extracellular vesicular exosome;Golgi apparatus;Golgi apparatus part;Golgi membrane;Golgi-associated vesicle;intracellular membrane-bounded…	7	3	2	18.4	9.2	5.9	43.867	0	6.7575	1980500000	25	Q8NBY1;tr|A0A1U7R4A5|A0A1U7R4A5_MESAU;B4E0Y9;Q9P289-2;Q9P289-3;Q9P289;C9JJV0	Q8NBY1;tr|A0A1U7R4A5|A0A1U7R4A5_MESAU;B4E0Y9;Q9P289-2;Q9P289-3;Q9P289	Serine/threonine-protein kinase 26	STK26
0	0	0	342800	1037900	3236400	1005000	0				Homo sapiens	cellular macromolecule metabolic process;cellular metabolic process;cellular process;cellular protein metabolic process;macromolecule metabolic process;macromolecule modification;metabolic process;primary metabolic process;protein arginylation;protein metabolic process;protein modification process	arginyltransferase activity;catalytic activity;transferase activity;transferase activity, transferring acyl groups;transferase activity, transferring amino-acyl groups	cell part;cytoplasm;intracellular membrane-bounded organelle;intracellular organelle;intracellular part;membrane-bounded organelle;nucleus;organelle	2	2	2	6.9	6.9	6.9	47.834	0.00034819	4.4358	95067000	3	B4E107;F5GXE4;O95260-2;B4DK25;tr|A0A1U8BTJ7|A0A1U8BTJ7_MESAU;H0Y5C2;O95260	B4E107;F5GXE4;O95260-2;B4DK25;tr|A0A1U8BTJ7|A0A1U8BTJ7_MESAU;H0Y5C2;O95260	Arginyl-tRNA--protein transferase 1	ATE1
4083500	0	0	0	1657100	6035400	361710	1403900				Homo sapiens	establishment of localization;establishment of localization in cell;establishment of RNA localization;gene expression;intracellular transport;macromolecule metabolic process;metabolic process;mRNA export from nucleus;mRNA transport;nuclear export;nuclear transport;nucleic acid transport;nucleobase-containing compound transport;nucleocytoplasmic transport;poly(A)+ mRNA export from nucleus;RNA expo…	binding;mRNA binding;nucleic acid binding;nucleocytoplasmic transporter activity;nucleotide binding;RNA binding;transporter activity	cell part;cytoplasm;cytoplasmic part;cytosol;inclusion body;intracellular membrane-bounded organelle;intracellular organelle;intracellular organelle part;intracellular part;macromolecular complex;membrane part;membrane-bounded organelle;nuclear body;nuclear inclusion body;nuclear part;nuclear pore;nuclear speck;nucleoplasm;nucleoplasm part;nucleus;organelle;organelle part;pore complex;protein com…	2	2	2	11.4	11.4	11.4	24.693	0.00067317	4.0028	205130000	3	B4E227;E9PIN3;Q9UBU9-2;Q9UBU9;E9PLA7;tr|A0A1U7Q663|A0A1U7Q663_MESAU	B4E227;E9PIN3;Q9UBU9-2;Q9UBU9;E9PLA7;tr|A0A1U7Q663|A0A1U7Q663_MESAU	Nuclear RNA export factor 1	NXF1
881970	0	1164400	632720	795680	1615900	0	1295600				Homo sapiens	biological regulation;catabolic process;cell cycle checkpoint;cell proliferation;cellular catabolic process;cellular macromolecule catabolic process;cellular macromolecule metabolic process;cellular metabolic process;cellular nitrogen compound metabolic process;cellular process;cellular protein metabolic process;cellular response to abiotic stimulus;cellular response to light stimulus;cellular re…	catalytic activity;cysteine-type endopeptidase activity;cysteine-type peptidase activity;endopeptidase activity;hydrolase activity;peptidase activity;peptidase activity, acting on L-amino acid peptides;small conjugating protein-specific protease activity;ubiquitin-specific protease activity	cell part;intracellular membrane-bounded organelle;intracellular non-membrane-bounded organelle;intracellular organelle;intracellular organelle part;intracellular part;macromolecular complex;membrane-bounded organelle;non-membrane-bounded organelle;nuclear part;nucleolus;nucleoplasm;nucleus;organelle;organelle part;protein complex	2	2	2	3.1	3.1	3.1	86.336	0.0021374	2.8469	270510000	3	G3V1N5;B4E3L3;Q96RU2-2;Q96RU2;H0YFT9;H0YG96;tr|A0A1U8BMS4|A0A1U8BMS4_MESAU;tr|A0A1U8BM74|A0A1U8BM74_MESAU;Q96RU2-3	G3V1N5;B4E3L3;Q96RU2-2;Q96RU2;H0YFT9;H0YG96;tr|A0A1U8BMS4|A0A1U8BMS4_MESAU;tr|A0A1U8BM74|A0A1U8BM74_MESAU;Q96RU2-3	Ubiquitin carboxyl-terminal hydrolase;Ubiquitin carboxyl-terminal hydrolase 28	USP28
9572200	1461900	3999100	2350700	2702800	7870800	725600	1380800				Homo sapiens	biological regulation;cell cycle phase;cell cycle process;cellular component organization;cellular component organization at cellular level;cellular component organization or biogenesis;cellular component organization or biogenesis at cellular level;cellular process;microtubule-based process;mitosis;negative regulation of biological process;negative regulation of cellular component organization;n…		cell part;cytoplasm;cytoskeletal part;intracellular non-membrane-bounded organelle;intracellular organelle;intracellular organelle part;intracellular part;macromolecular complex;membrane;microtubule;mitotic spindle;non-membrane-bounded organelle;organelle;organelle part;protein complex;spindle	7	7	7	10.3	10.3	10.3	110.18	0	24.694	1559300000	18	B5MBZ0;Q9HC35;Q9HC35-2;tr|A0A1U8C393|A0A1U8C393_MESAU	B5MBZ0;Q9HC35;Q9HC35-2;tr|A0A1U8C393|A0A1U8C393_MESAU	Echinoderm microtubule-associated protein-like 4	EML4
13101000	4123900	5861900	4792100	17759000	20998000	12866000	7479800				Homo sapiens	anatomical structure homeostasis;base-excision repair;biological regulation;biosynthetic process;catabolic process;cell cycle;cell cycle process;cellular biosynthetic process;cellular catabolic process;cellular component assembly;cellular component assembly at cellular level;cellular component organization;cellular component organization at cellular level;cellular component organization or biogen…	binding;damaged DNA binding;DNA binding;nucleic acid binding;single-stranded DNA binding;structure-specific DNA binding	cell part;chromosomal part;DNA replication factor A complex;intracellular membrane-bounded organelle;intracellular organelle;intracellular organelle part;intracellular part;macromolecular complex;membrane-bounded organelle;nuclear chromosome part;nuclear part;nucleoplasm;nucleus;organelle;organelle part;protein complex	3	3	3	52.4	52.4	52.4	9.1703	0	6.6925	434900000	7	B5MC59;P35244;tr|A0A1U7R091|A0A1U7R091_MESAU	B5MC59;P35244	Replication protein A 14 kDa subunit	RPA3
8565700	2992200	6935800	0	10569000	13951000	4057000	0				Homo sapiens	biological regulation;cellular process;cellular response to stimulus;developmental process;multicellular organismal development;multicellular organismal process;regulation of biological process;regulation of cellular process;response to stimulus;signal transduction	binding;carboxylic acid binding;isoprenoid binding;lipid binding;monocarboxylic acid binding;retinal binding;retinoic acid binding;retinoid binding;retinol binding;transporter activity;vitamin binding	cell part;cytoplasmic part;cytosol;intracellular part	2	2	2	23.9	23.9	23.9	12.16	0.00035026	4.5369	235350000	3	B5MCB5;tr|C6JUN1|C6JUN1_MESAU;P29762	B5MCB5;tr|C6JUN1|C6JUN1_MESAU;P29762	Cellular retinoic acid-binding protein 1	CRABP1
9918000	2625700	5359600	290370	3391200	3929100	215070	2963000				Homo sapiens	biological regulation;cell proliferation;cellular component biogenesis;cellular component biogenesis at cellular level;cellular component organization;cellular component organization at cellular level;cellular component organization or biogenesis;cellular component organization or biogenesis at cellular level;cellular localization;cellular macromolecule localization;cellular macromolecule metabol…	binding;ribonucleoprotein binding	cell part;chromosome;condensed chromosome;cytoplasm;intracellular membrane-bounded organelle;intracellular non-membrane-bounded organelle;intracellular organelle;intracellular organelle part;intracellular part;macromolecular complex;membrane;membrane-bounded organelle;non-membrane-bounded organelle;nuclear part;nucleolar part;nucleolus;nucleoplasm;nucleus;organelle;organelle part;PeBoW complex;pr…	4	4	4	8.2	8.2	8.2	66.077	0	6.1901	908420000	10	B5MCF9;O00541-2;O00541;B3KXD6;tr|A0A1U7QM20|A0A1U7QM20_MESAU	B5MCF9;O00541-2;O00541;B3KXD6;tr|A0A1U7QM20|A0A1U7QM20_MESAU	Pescadillo homolog	PES1
0	16933000	2199600	4599100	12022000	8319500	4578000	12329000				Homo sapiens	biological regulation;negative regulation of biological process;negative regulation of biosynthetic process;negative regulation of cellular biosynthetic process;negative regulation of cellular macromolecule biosynthetic process;negative regulation of cellular metabolic process;negative regulation of cellular process;negative regulation of gene expression;negative regulation of macromolecule biosy…	binding;chromatin binding;enzyme binding;protein binding	cell part;centromeric heterochromatin;chromatin;chromocenter;chromosomal part;chromosome, centromeric region;cytoskeletal part;female pronucleus;heterochromatin;intracellular membrane-bounded organelle;intracellular non-membrane-bounded organelle;intracellular organelle;intracellular organelle part;intracellular part;male pronucleus;membrane-bounded organelle;non-membrane-bounded organelle;nuclea…	3	2	2	26.2	16.7	16.7	19.325	0	103.56	437580000	6	B5MD17;J3KS05;P83916;K7ELA4;C9JWS9	B5MD17;J3KS05;P83916;K7ELA4	Chromobox protein homolog 1	CBX1
1250000000	664449984	917390016	269100000	1248099968	1163399936	657420032	743539968				Homo sapiens	actin cytoskeleton organization;actin filament-based process;anatomical structure development;androgen receptor signaling pathway;biological regulation;cell cycle phase;cell cycle process;cell development;cell division;cellular component organization;cellular component organization at cellular level;cellular component organization or biogenesis;cellular component organization or biogenesis at cel…	androgen receptor binding;binding;catalytic activity;chromatin binding;GDP binding;GTP binding;GTPase activity;guanyl nucleotide binding;guanyl ribonucleotide binding;hormone receptor binding;hydrolase activity;hydrolase activity, acting on acid anhydrides;hydrolase activity, acting on acid anhydrides, in phosphorus-containing anhydrides;nuclear hormone receptor binding;nucleoside-triphosphatase …	cell part;centriole;cytoplasm;cytoplasmic membrane-bounded vesicle;cytoplasmic part;cytoplasmic vesicle;cytoskeletal part;cytosol;endosome;extracellular membrane-bounded organelle;extracellular organelle;extracellular region part;extracellular vesicular exosome;intracellular;intracellular membrane-bounded organelle;intracellular non-membrane-bounded organelle;intracellular organelle;intracellular…	12	12	4	42.5	42.5	18.9	26.224	0	323.31	88784000000	349	B5MDF5;P62826;tr|A0A1U7QIW2|A0A1U7QIW2_MESAU;J3KQE5;F5H018;tr|A0A1U7QGC7|A0A1U7QGC7_MESAU;tr|A0A1U7R6V6|A0A1U7R6V6_MESAU;H0YFC6;B4DV51;A0A087X0W0	B5MDF5;P62826;tr|A0A1U7QIW2|A0A1U7QIW2_MESAU;J3KQE5;F5H018;tr|A0A1U7QGC7|A0A1U7QGC7_MESAU;tr|A0A1U7R6V6|A0A1U7R6V6_MESAU;H0YFC6	GTP-binding nuclear protein Ran	RAN
0	1685200	0	0	1292900	4830400	0	1915100				Homo sapiens				2	2	2	6.5	6.5	6.5	42.668	0	6.9855	204190000	4	B5MDU6;Q9H6V9;Q9H6V9-2;C9JHU6;B5MCE2;C9JUM0;B4DRG3;B5MCU4;A0A0A0MSH6;Q9H6V9-4;Q9H6V9-3	B5MDU6;Q9H6V9;Q9H6V9-2;C9JHU6;B5MCE2;C9JUM0;B4DRG3;B5MCU4;A0A0A0MSH6;Q9H6V9-4;Q9H6V9-3	UPF0554 protein C2orf43	LDAH;C2orf43;FLJ21820
31147000	42181000	42030000	12992000	36613000	61672000	15284000	41970000				Homo sapiens	biological regulation;biosynthetic process;cellular biosynthetic process;cellular component assembly;cellular component assembly at cellular level;cellular component organization;cellular component organization at cellular level;cellular component organization or biogenesis;cellular component organization or biogenesis at cellular level;cellular macromolecular complex assembly;cellular macromolec…	binding;nucleic acid binding;RNA binding;translation factor activity, nucleic acid binding;translation initiation factor activity	cell part;cytoplasmic part;cytosol;eukaryotic 43S preinitiation complex;eukaryotic 48S preinitiation complex;eukaryotic translation initiation factor 3 complex;intracellular part;macromolecular complex;protein complex;ribonucleoprotein complex;translation preinitiation complex	23	23	2	27.2	27.2	2.7	104.1	0	323.31	16555000000	168	Q99613-2;Q99613;B5ME19;H3BPE4;H3BPE3;H3BTY8	Q99613-2;Q99613;B5ME19	Eukaryotic translation initiation factor 3 subunit C;Eukaryotic translation initiation factor 3 subunit C-like protein	EIF3C;EIF3CL
0	0	0	0	0	238900	0	346490				Homo sapiens			cell part;cytoplasm;cytoskeletal part;intracellular organelle part;intracellular part;macromolecular complex;microtubule;organelle part;protein complex	1	1	1	2.4	2.4	2.4	73.281	0.0049233	2.3953	19903000	1	G3V195;G3V1D0;B7WPE2;tr|A0A1U8BM66|A0A1U8BM66_MESAU;H0Y3M3;Q32P44;Q32P44-2	G3V195;G3V1D0;B7WPE2;tr|A0A1U8BM66|A0A1U8BM66_MESAU;H0Y3M3;Q32P44;Q32P44-2	Echinoderm microtubule-associated protein-like 3	EML3
9646300	3354600	0	4633200	10722000	10028000	2178700	4675100				Homo sapiens			extracellular membrane-bounded organelle;extracellular organelle;extracellular region part;extracellular vesicular exosome;membrane-bounded organelle;membrane-bounded vesicle;organelle;vesicle	2	2	2	20.9	20.9	20.9	9.9502	0.0021699	2.9853	426140000	7	G3V121;B7Z2L8;Q86WR0	G3V121;B7Z2L8;Q86WR0	Coiled-coil domain-containing protein 25	CCDC25
2006900	1454800	2361200	86825	1309700	3088700	275080	887510				Homo sapiens	biosynthetic process;carbohydrate biosynthetic process;carbohydrate metabolic process;cellular carbohydrate metabolic process;cellular component organization;cellular component organization at cellular level;cellular component organization or biogenesis;cellular component organization or biogenesis at cellular level;cellular macromolecule metabolic process;cellular metabolic process;cellular proc…	protein transporter activity;substrate-specific transporter activity;transporter activity	cell part;cytoplasmic part;cytosol;Golgi apparatus part;Golgi membrane;Golgi stack;Golgi transport complex;intracellular organelle part;intracellular part;macromolecular complex;membrane;organelle membrane;organelle part;protein complex	6	6	6	14.9	14.9	14.9	76.078	0	14.933	675650000	16	B7Z2Y2;Q14746-2;Q14746;V9GY21;tr|A0A1U8CL91|A0A1U8CL91_MESAU;tr|A0A1U7QCD2|A0A1U7QCD2_MESAU	B7Z2Y2;Q14746-2;Q14746	Conserved oligomeric Golgi complex subunit 2	COG2
4740800	0	0	0	0	0	0	0				Homo sapiens	anaphase-promoting complex-dependent proteasomal ubiquitin-dependent protein catabolic process;biological regulation;catabolic process;cell cycle;cell cycle checkpoint;cell cycle process;cell surface receptor linked signaling pathway;cellular catabolic process;cellular component organization;cellular component organization at cellular level;cellular component organization or biogenesis;cellular c…	acid-amino acid ligase activity;adenyl nucleotide binding;adenyl ribonucleotide binding;ATP binding;binding;catalytic activity;ISG15 ligase activity;ligase activity;ligase activity, forming carbon-nitrogen bonds;nucleotide binding;purine nucleotide binding;purine ribonucleoside triphosphate binding;purine ribonucleotide binding;ribonucleotide binding;small conjugating protein ligase activity;ubiq…	cell part;cytoplasmic part;cytosol;intracellular membrane-bounded organelle;intracellular organelle;intracellular organelle part;intracellular part;macromolecular complex;membrane-bounded organelle;nuclear part;nucleoplasm;nucleus;organelle;organelle part;protein complex;ubiquitin ligase complex	1	1	1	12.2	12.2	12.2	16.21	0	10.549	100840000	0	C9J2P0;H7C061;B7Z306;tr|A0A1U7QKR6|A0A1U7QKR6_MESAU;P51965-2;P51965	C9J2P0;H7C061;B7Z306;tr|A0A1U7QKR6|A0A1U7QKR6_MESAU;P51965-2;P51965	Ubiquitin-conjugating enzyme E2 E1	UBE2E1
328300000	76598000	30731000	54967000	185600000	296929984	42399000	163970000				Homo sapiens	biosynthetic process;catabolic process;cellular biosynthetic process;cellular catabolic process;cellular component disassembly;cellular component disassembly at cellular level;cellular component organization;cellular component organization at cellular level;cellular component organization or biogenesis;cellular component organization or biogenesis at cellular level;cellular macromolecular complex…	binding;nucleic acid binding;RNA binding;structural constituent of ribosome;structural molecule activity	adherens junction;anchoring junction;cell junction;cell part;cell-substrate adherens junction;cell-substrate junction;cytoplasmic part;cytosol;cytosolic large ribosomal subunit;extracellular membrane-bounded organelle;extracellular organelle;extracellular region part;extracellular vesicular exosome;focal adhesion;intracellular non-membrane-bounded organelle;intracellular organelle;intracellular o…	5	5	5	42.6	42.6	42.6	12.701	0	13.838	19004000000	92	H7C2W9;C9JU56;B7Z4E3;B7Z4C8;P62899-3;P62899;P62899-2;B8ZZK4;tr|A0A1U8C0Q7|A0A1U8C0Q7_MESAU	H7C2W9;C9JU56;B7Z4E3;B7Z4C8;P62899-3;P62899;P62899-2;B8ZZK4;tr|A0A1U8C0Q7|A0A1U8C0Q7_MESAU	60S ribosomal protein L31	RPL31
[truncated: 3,146 more rows]

## Sheet: 4. TOP 100 cytosol
iBAQ Macrop+IFN_WholeCyt_A6_21	iBAQ Macrop+IFN_WholeCyt_B6_22	iBAQ Macrop+IFN_WholeCyt_C6_23	iBAQ Macrop+IFN_WholeCyt_D6_24	iBAQ MacropWholeCyt_A5_17	iBAQ MacropWholeCyt_B5_18	iBAQ MacropWholeCyt_C5_19	iBAQ MacropWholeCyt_D5_20	Protein IDs	Majority protein IDs	Protein names	Gene names
[truncated: 2,212 more rows]

[truncated: 5 more sheets: 5. normalisation factor, 6. iBAQs normalised, 7. iBAQs log2 imputated, 8. Fig. S2C Welch t-test, 9. Interferome ISGs]
