# Supplementary material for: The interferon-inducible GTPase MxB promotes capsid disassembly and genome release of herpesviruses
Source: eLife. 2022 Apr 27;11:e76804. doi: 10.7554/eLife.76804 (PMC9150894; doi:10.7554/eLife.76804)
Supplement: Supplementary file 3. — Intensity-based absolute quantification (iBAQ) counts of HSV-1(17+)Lox viral proteins from isolated V0.1, V0.5, V1 and D capsids (A) normalized to the intensity of the major capsid protein VP5, (B) unnormalized LFQ intensities. The viral proteins were filtered to keep only those with intensities measured in at least three out of four replicates, in at least one condition. [file elife-76804-supp3.xlsx]

## Sheet: 1. MS analysis pipeline
Project	HSV1-capsid_interactome_Thp1
Analysis	VG - 04.2021
Perseus	1.6.5.0 version
Protein groups	3956
Workflow general
	iBAQ intensity
	Cleaning filter
	Annotation (taxonony, GO terms)
	Export for "isolated capsid" normalisation
	filter for "cytosol"
	Grouping / condition
	log2
	Filter valid value mini. 3/ each condition
	keep human proteins
	back transform intensities
	imputation NaN > 0
	Export for "cytosol" normalisation
	filter for "beads" samples
	Grouping / condition
	log2
	Filter valid value mini. 3/ each condition
	keep human proteins
	back transform intensities
	imputation NaN > 0
	Export for "cytosol" normalisation
Normalisation
	Cytosol (no MCP) > Norm to all (3 values per condition): iBAQ(pg) / (iBAQ median all sample / iBAQ median all all)
	Normalised matrices - loaded to perseus
Isolated capsid	loaded: 12042021_Manutea_HSV1-capsid_Quant2_iBAQ_norm.txt
	Filter for "caps only" samples
	log2 transform
	Remove hamster proteins
	Grouping / condition
	Filter valid value mini. 3 in one condition
Composition purified capsids	Hierarchical clustering rows
	Fisher exact test on cluster > ribosomal proteins
Enrichment on capsid input?	Imputation (normal - total)
	two-sampe t-test (Welch)
	permutation-based FDR < 0.05; S0 = 0
	Volcanos

## Sheet: 2. legend
iBAQ	log2 iBAQ normalised imputed
Taxonomy	homo sapiens annotation (Perseus 2015)
GOBP name	GO annotations (Persues 2015)
GOMF name	GO annotations (Persues 2015)
GOCC name	GO annotations (Persues 2015)
Taxonomy manual	manual annotation to include viral and hamster proteins
Interferome FC>2	annotation gene list Interferome DB (http://www.interferome.org/interferome/home.jspx) Fold change > 2
Interferome_n_exp	number of experiments considered in Interferom DB
welch t-test perm Sign. …..	significant hits in the given test using the Permutation-based FDR correction
Peptides	total number of peptides
Razor + unique peptides	shared and unique peptides - used for quantification
Unique peptides	unique peptides
Sequence coverage [%]
Unique + razor sequence coverage [%]
Unique sequence coverage [%]
Mol. weight [kDa]
Q-value
Score
Intensity
MS/MS count
Protein IDs
Majority protein IDs
Protein names
Gene names

## Sheet:  3. all raw iBAQs
D_1	D_2	D_3	D_4	V1_1	V1_2	V1_3	V1_4	V0.5_1	V0.5_2	V0.5_3	V0.5_4	V0.1_1	V0.1_2	V0.1_3	V0.1_4	Only identified by site	Reverse	Potential contaminant	Taxonomy	GOBP name	GOMF name	GOCC name	Peptides	Razor + unique peptides	Unique peptides	Sequence coverage [%]	Unique + razor sequence coverage [%]	Unique sequence coverage [%]	Mol. weight [kDa]	Q-value	Score	Intensity	MS/MS count	Protein IDs	Majority protein IDs	Protein names	Gene names
0	0	0	0	3467000	3526000	3491800	4759800	3012200	2929300	2053800	4382800	4218600	5318200	4312900	6531600								1	1	1	21.6	21.6	21.6	9.7929	0	17.105	539100000	15	sp|P03170|ICP47_HHV11	sp|P03170|ICP47_HHV11
72932000	61374000	52581000	62547000	45940000	65473000	86412000	67404000	42322000	44487000	37214000	52959000	63963000	73563000	97058000	65906000								10	10	10	37.2	37.2	37.2	40.972	0	323.31	43923000000	345	sp|P03176|KITH_HHV11	sp|P03176|KITH_HHV11
436190016	471900000	336990016	436489984	422340000	668289984	619870016	553920000	137820000	255970000	248040000	242740000	570019968	890280000	870569984	935670016								7	7	7	27.5	27.5	27.5	51.392	0	323.31	244000000000	798	sp|P04288|GM_HHV11	sp|P04288|GM_HHV11
34514000	41886000	33467000	31830000	73464000	80959000	43496000	100210000	46747000	69973000	72552000	52249000	81794000	122480000	126130000	97824000								16	16	16	55	55	55	57.196	0	323.31	73381000000	547	sp|P04290|UL13_HHV11	sp|P04290|UL13_HHV11
113810000	143840000	114440000	87335000	160090000	229820000	264280000	269900000	119670000	243080000	158050000	198110000	199330000	218400000	230560000	358000000								15	15	15	56.6	56.6	56.6	23.933	0	323.31	99769000000	486	sp|P04291|TEG3_HHV11	sp|P04291|TEG3_HHV11
347220	595400	333030	157820	237980	322980	554660	144520	0	76503	351340	0	317970	711600	483700	289730								7	7	7	7.9	7.9	7.9	136.42	0	24.178	2705900000	17	sp|P04293|DPOL_HHV11	sp|P04293|DPOL_HHV11
49773000	47861000	37615000	39825000	54368000	56742000	69168000	71582000	41765000	87160000	63499000	56533000	65339000	86629000	94857000	102160000								16	16	16	37.2	37.2	37.2	67.507	0	323.31	79450000000	632	sp|P04294|AN_HHV11	sp|P04294|AN_HHV11
0	0	0	936160	0	0	301550	82777	997560	1049000	0	982520	505400	671980	0	2849400								8	8	8	13.3	13.3	13.3	80.922	0	10.921	900390000	20	sp|P04295|TRM3_HHV11	sp|P04295|TRM3_HHV11
15803000	7182400	7496800	9142000	10849000	17024000	17587000	22244000	5451000	19980000	12189000	10641000	16304000	21275000	22586000	38419000								30	30	30	29.8	29.8	29.8	128.35	0	106.33	45780000000	420	sp|P04296|DNBI_HHV11	sp|P04296|DNBI_HHV11
260010000	403489984	195780000	193350000	569689984	478500000	403360000	744460032	437700000	727520000	456080000	497980000	639840000	932120000	1045500032	1324300032								21	21	21	49.3	49.3	49.3	52.834	0	323.31	426000000000	1025	sp|P04413|US03_HHV11	sp|P04413|US03_HHV11
18821000	30350000	14867000	13076000	40856000	66468000	34503000	73439000	31087000	56886000	33334000	40371000	41294000	61819000	55115000	62164000								6	6	6	16.9	16.9	16.9	46.524	0	24.501	23973000000	125	sp|P04485|ICP22_HHV11	sp|P04485|ICP22_HHV11
9661300	19971000	15467000	11451000	17114000	23797000	17844000	22812000	5062800	7389900	13672000	10350000	19519000	39603000	22169000	47992000								5	5	5	46.6	46.6	46.6	17.757	0	8.6333	3565000000	42	sp|P04487|RNB_HHV11	sp|P04487|RNB_HHV11
136470000	205570000	118330000	122410000	292380000	400740000	284200000	494080000	206420000	403369984	282809984	375529984	694280000	878329984	805500032	775980032								19	19	19	40.7	40.7	40.7	59.093	0	323.31	374000000000	835	sp|P04488|GE_HHV11	sp|P04488|GE_HHV11
34614000	47063000	38092000	46731000	4623700	6739700	3531100	7655600	872030	1950300	621150	1635100	1530600	6033100	4349300	6453200								15	15	15	24.3	24.3	24.3	90.365	0	205.85	15418000000	157	sp|P06477|GH_HHV11	sp|P06477|GH_HHV11
58587000	1474800	1013100	0	61230000	71183000	140620000	119980000	128170000	211960000	57206000	67008000	187470000	103700000	157330000	315320000								2	2	2	47.8	47.8	47.8	10.027	0	323.31	8220200000	64	sp|P06481|US9_HHV11	sp|P06481|US9_HHV11
16030000	0	5004800	3585800	0	50207000	0	30256000	10945000	45946000	8058500	2838900	44572000	59732000	42735000	91579000								2	2	2	11.3	11.3	11.3	25.238	0.0021759	3.0195	5280300000	23	sp|P06484|GG_HHV11	sp|P06484|GG_HHV11
772979968	868280000	736390016	625910016	794400000	951110016	624060032	1098800000	515910016	831459968	696640000	685500032	861569984	1056600000	1093400064	1367200000								15	15	15	59.5	59.5	59.5	32.47	0	323.31	550000000000	1524	sp|P06485|US02_HHV11	sp|P06485|US02_HHV11
217470000	229860000	139330000	178140000	280110016	417160000	446969984	531249984	259530000	306969984	348769984	285569984	343710016	521030016	560259968	723390016								17	17	17	69.9	69.9	69.9	34.055	0	323.31	268000000000	1057	sp|P06486|US10_HHV11	sp|P06486|US10_HHV11
92557000	164070000	88528000	83073000	58626000	70745000	86912000	86582000	76261000	110190000	34355000	51535000	93901000	236390000	172710000	183630000								9	9	9	40.8	40.8	40.8	41.369	0	323.31	51860000000	265	sp|P06487|GI_HHV11	sp|P06487|GI_HHV11
7773700096	11427000320	6035200000	7942600192	7082599936	6303499776	4652499968	7244299776	3592499968	7508400128	5646199808	6038400000	7559000064	9556500480	8560799744	9042400256								83	83	83	73.9	73.9	73.9	149.08	0	323.31	18900000000000	21439	sp|P06491|MCP_HHV11	sp|P06491|MCP_HHV11
1688099968	1561100032	1227600000	1412600064	3974299904	4048000000	3718599936	4940299776	2527200000	4787400192	3131699968	2983399936	4776099840	5639799808	5617900032	6904999936								26	26	26	65.7	65.7	65.7	54.345	0	323.31	3220000000000	4222	sp|P06492|VP16_HHV11	sp|P06492|VP16_HHV11
263920000	289400000	277140000	247810000	1061500032	913209984	841600000	1029600000	448049984	1141699968	793590016	831680000	1120099968	1464499968	1302700032	1612899968								75	75	75	72.6	72.6	72.6	132.84	0	323.31	2390000000000	5683	sp|P08392|ICP4_HHV11	sp|P08392|ICP4_HHV11
15956000	15023000	14899000	4247200	858160000	869420032	996659968	1056400000	439760000	1086499968	611520000	757150016	800849984	1124499968	835110016	1291500032								37	37	37	59	59	59	78.456	0	323.31	900000000000	1980	sp|P08393|ICP0_HHV11	sp|P08393|ICP0_HHV11
155230000	181260000	96912000	132490000	105130000	110890000	124250000	122970000	69898000	110570000	81798000	86499000	119880000	188050000	187300000	233700000								50	50	50	59.4	59.4	59.4	124.05	0	323.31	306000000000	1949	sp|P08543|RIR1_HHV11	sp|P08543|RIR1_HHV11
44195000	73954000	20949000	52626000	18706000	41525000	18179000	39406000	9154300	36443000	32109000	20765000	56274000	60709000	61394000	58795000								10	10	10	39.8	39.8	39.8	36.328	0	37.267	33754000000	142	sp|P10186|UNG_HHV11	sp|P10186|UNG_HHV11
14616000	9860100	9046600	6029900	50937000	15084000	8062000	54329000	4409900	4075900	11541000	7643600	11791000	13998000	12677000	10765000								23	23	23	35.3	35.3	35.3	98.714	0	134.96	40713000000	330	sp|P10189|HELI_HHV11	sp|P10189|HELI_HHV11
7.52783e+07	5.6676e+07	3.86396e+07	4.1005e+07	65425000	65505000	53980000	99284000	40114000	71353000	44634000	62737000	69102000	113640000	93805000	197180000								22	22	22	39.3	39.3	39.3	74.091	0	323.31	107000000000	650	sp|P10190|PORTL_HHV11	sp|P10190|PORTL_HHV11
161580000	106590000	118550000	110540000	103010000	114790000	138900000	115100000	65968000	75351000	102680000	98374000	133700000	124850000	127930000	183970000								12	12	11	48	48	45.6	33.059	0	323.31	94183000000	560	sp|P10191|CEP1_HHV11	sp|P10191|CEP1_HHV11
195480000	227610000	207600000	217310000	252740000	291160000	240020000	371240000	150160000	241260000	196700000	193790000	300100000	489529984	553870016	603299968								15	15	15	41.6	41.6	41.6	40.442	0	323.31	170000000000	628	sp|P10200|CEP2_HHV11	sp|P10200|CEP2_HHV11
738070016	837270016	558259968	715800000	839120000	846880000	802929984	1057500032	519680000	760080000	701939968	720680000	1021699968	1321699968	1256800000	1401799936								41	41	41	62.3	62.3	62.3	74.581	0	323.31	1370000000000	3572	sp|P10201|CVC1_HHV11	sp|P10201|CVC1_HHV11
4178500096	4052100096	3760000000	3751000064	2606000128	2614200064	3110599936	3817100032	2104800000	2800399872	1634099968	3116100096	3163200000	3337799936	3608999936	4385099776								25	25	25	84.9	84.9	84.9	34.27	0	323.31	2600000000000	3886	sp|P10202|TRX2_HHV11	sp|P10202|TRX2_HHV11
222220000	207450000	250450000	166560000	486560000	418840000	558529984	513640000	359860000	481329984	412350016	450580000	403340000	718550016	619209984	1050000000								30	30	30	66.2	66.2	66.2	57.641	0	323.31	553000000000	1793	sp|P10205|TEG4_HHV11	sp|P10205|TEG4_HHV11
5493300	5632100	10030000	317930	2112100	7689700	3066900	8203300	4124900	1530600	1959100	2096700	4654700	4864200	14965000	4565200								3	3	3	13.4	13.4	13.4	29.476	0	7.7816	3521200000	47	sp|P10208|UL24_HHV11	sp|P10208|UL24_HHV11
429680000	513220000	295360000	193620000	814110016	721500032	805059968	1038800000	494750016	975630016	678540032	827740032	889260032	1088400000	1042200000	1202599936								34	34	34	78.8	78.8	78.8	62.669	0	323.31	1000000000000	2999	sp|P10209|CVC2_HHV11	sp|P10209|CVC2_HHV11
339830016	325240000	194940000	284700000	223500000	265670000	304780000	427440000	138310000	344120000	219000000	204600000	237560000	268950016	229970000	325400000								20	20	20	41.4	41.4	41.4	66.47	0	323.31	270000000000	1291	sp|P10210|SCAF_HHV11	sp|P10210|SCAF_HHV11
91508000	109260000	66363000	72015000	407049984	469520000	436929984	555249984	280009984	424520000	376830016	244500000	473129984	573939968	570510016	782780032								42	42	42	49.4	49.4	49.4	100.29	0	323.31	767000000000	1774	sp|P10211|GB_HHV11	sp|P10211|GB_HHV11
3516900	1551700	2476400	3093900	5023500	7703400	5227200	8206200	4988000	6249300	2045100	2385900	6930000	6746400	5971800	11236000								2	2	2	9.8	9.8	9.8	33.953	0	48.999	3336200000	62	sp|P10215|NEC1_HHV11	sp|P10215|NEC1_HHV11
24815000	28653000	1663900	0	25833000	56059000	1233400	1268500	44550000	2573200	1900400	22447000	1282500	1371700	15446000	2338000								3	3	3	23.8	23.8	23.8	14.437	0.0021545	2.9227	4000500000	6	sp|P10217|TRM2_HHV11	sp|P10217|TRM2_HHV11
29886000	23766000	10441000	29547000	10145000	30213000	34359000	49501000	16310000	15654000	24333000	14861000	20865000	50423000	35029000	60478000								7	7	7	34.2	34.2	34.2	29.79	0	121.17	18771000000	148	sp|P10218|NEC2_HHV11	sp|P10218|NEC2_HHV11
2107399936	2055200000	1400099968	2615800064	1993900032	3772800000	3006500096	3644699904	2401999872	3928100096	2897900032	3510299904	3758099968	3732699904	3790000128	5436899840								9	9	9	91.1	91.1	91.1	12.096	0	323.31	636000000000	863	sp|P10219|SCP_HHV11	sp|P10219|SCP_HHV11
59428000	81955000	40178000	55263000	927089984	853249984	691870016	910819968	323400000	965520000	748089984	735880000	944460032	1244199936	1256300032	1267800064								153	153	153	57.8	57.8	57.8	335.86	0	323.31	3930000000000	9264	sp|P10220|LTP_HHV11	sp|P10220|LTP_HHV11
119570000	129480000	99486000	101580000	726110016	773320000	567000000	864910016	426620000	906200000	652289984	746419968	845539968	1148199936	1133100032	1569699968								66	66	66	80.1	80.1	80.1	120.55	0	323.31	1420000000000	4252	sp|P10221|ITP_HHV11	sp|P10221|ITP_HHV11
31125000	11388000	16810000	27188000	13655000	16371000	16180000	20465000	4812900	12587000	10218000	10586000	26598000	26778000	19640000	32813000								10	10	10	36.8	36.8	36.8	38.019	0	212.73	16063000000	217	sp|P10224|RIR2_HHV11	sp|P10224|RIR2_HHV11
211150000	237070000	193350000	254350000	462660000	549769984	465889984	611310016	316440000	465180000	436780000	435920000	596400000	805169984	857630016	874569984								29	29	29	63.2	63.2	63.2	54.917	0	323.31	579000000000	1612	sp|P10225|SHUT_HHV11	sp|P10225|SHUT_HHV11
35842000	54701000	12037000	21433000	8775700	17512000	9341200	17452000	8576600	8123100	11357000	13432000	20621000	17974000	18056000	23601000								11	11	11	32.2	32.2	32.2	51.159	0	276.84	15564000000	240	sp|P10226|PAP_HHV11	sp|P10226|PAP_HHV11
64476000	85430000	36496000	25199000	3605400	2596800	6614300	12763000	2233800	2000600	505130	1649300	7790400	13691000	5449100	21646000								8	8	8	23.3	23.3	23.3	54.998	0	67.98	10544000000	124	sp|P10228|GC_HHV11	sp|P10228|GC_HHV11
173700000	107810000	25493000	71251000	30186000	52720000	15656000	43127000	0	17453000	18215000	26060000	24084000	42359000	21248000	38751000								3	3	3	27.9	27.9	27.9	18.18	0	170.35	13560000000	67	sp|P10229|EV45_HHV11	sp|P10229|EV45_HHV11
567440000	759470016	502160000	649480000	2206899968	2401100032	1761900032	3118700032	1474700032	3498099968	2016099968	2292699904	3280999936	4157499904	3882899968	3584100096								50	50	50	72.3	72.3	72.3	78.24	0	323.31	3230000000000	6607	sp|P10230|TEG1_HHV11	sp|P10230|TEG1_HHV11
1566499968	1445500032	1192600064	1348400000	2930400000	3680399872	3605199872	4221499904	1869200000	3600499968	2868499968	3000300032	5984000000	7270300160	7449699840	8226100224								59	59	59	84.8	84.8	84.8	73.816	0	323.31	5960000000000	8061	sp|P10231|TEG5_HHV11;tr|A0A1U8C8T2|A0A1U8C8T2_MESAU	sp|P10231|TEG5_HHV11
1101400064	1677799936	1143299968	886510016	4574799872	5043200000	5283100160	5326700032	3390799872	4661100032	4311600128	5442200064	6578599936	7093700096	6524199936	9646900224								30	30	30	83.4	83.4	83.4	32.254	0	323.31	2840000000000	4522	sp|P10233|VP22_HHV11	sp|P10233|VP22_HHV11
461380000	406910016	185960000	360580000	580400000	698419968	638720000	1041200000	422040000	960990016	583129984	651139968	931870016	940649984	1184300032	1364700032								23	23	23	76.8	76.8	76.8	39.127	0	323.31	647000000000	1807	sp|P10234|DUT_HHV11	sp|P10234|DUT_HHV11
145350000	125560000	89746000	98725000	232220000	235780000	324670016	392140000	155420000	295169984	193340000	230530000	289510016	372940000	352420000	482929984								11	11	11	58.2	58.2	58.2	25.47	0	323.31	141000000000	570	sp|P10235|TEG7_HHV11	sp|P10235|TEG7_HHV11
2262000	3503200	2055200	2491800	3058900	4440700	4386100	5127800	1903600	3344500	3138100	4448400	2745800	4862400	6754900	6608500								17	17	17	21.4	21.4	21.4	114.42	0	95.628	9395800000	153	sp|P10236|PRIM_HHV11	sp|P10236|PRIM_HHV11
80142000	111660000	90014000	98039000	247440000	272089984	133940000	322740000	139720000	324880000	201470000	165770000	333350016	389680000	376100000	397200000								22	22	22	59.8	59.8	59.8	55.252	0	323.31	196000000000	794	sp|P10238|ICP27_HHV11	sp|P10238|ICP27_HHV11
78149000	30609000	53157000	36176000	37349000	64111000	59959000	87010000	52507000	59566000	48336000	69377000	53430000	81962000	98076000	114890000								7	7	7	41.9	41.9	41.9	20.492	0	266.84	26793000000	177	sp|P10239|TEG6_HHV11	sp|P10239|TEG6_HHV11
31368000	49686000	34911000	13302000	162230000	271120000	341620000	303550016	197910000	296030016	209790000	230500000	316710016	393009984	427100000	624840000								6	6	6	41.1	41.1	41.1	21.183	0	323.31	61263000000	266	sp|P10240|UL56_HHV11	sp|P10240|UL56_HHV11
2571000064	3332999936	1302099968	2398099968	1431299968	2059000064	1559699968	2325400064	1005000000	2682899968	1401400064	1461799936	1996800000	2452400128	2839000064	2686799872								25	25	25	61.3	61.3	61.3	50.263	0	323.31	1690000000000	2830	sp|P32888|TRX1_HHV11	sp|P32888|TRX1_HHV11
65682000	61781000	48331000	57080000	13637000	29918000	18550000	17741000	8899900	10004000	9145700	17059000	7248200	2980300	3900100	11614000								4	4	4	16	16	16	37.572	0	169.49	16351000000	82	sp|P68331|GK_HHV11	sp|P68331|GK_HHV11
88532000	241460000	105890000	130320000	25141000	32534000	38028000	43311000	16210000	41694000	21061000	28181000	47684000	57617000	56055000	53259000								11	11	11	36.5	36.5	36.5	43.346	0	323.31	36733000000	177	sp|Q69091|GD_HHV11	sp|Q69091|GD_HHV11

## Sheet: 4. normalization factor
	D_1	D_2	D_3	D_4	V1_1	V1_2	V1_3	V1_4	V0.5_1	V0.5_2	V0.5_3	V0.5_4	V0.1_1	V0.1_2	V0.1_3	V0.1_4
category	caps
normalisation method	MCP: iBAQ(pg) / [iBAQ MCP sample / iBAQ MCP median)]
median all	7376349952
norm. fact. Sample	1.05387	1.54914	0.818182	1.07677	0.960177	0.854555	0.630732	0.982098	0.487029	1.0179	0.765446	0.818616	1.02476	1.29556	1.16057	1.22586

## Sheet: 5. iBAQs normalised
D_1	D_2	D_3	D_4	V1_1	V1_2	V1_3	V1_4	V0.5_1	V0.5_2	V0.5_3	V0.5_4	V0.1_1	V0.1_2	V0.1_3	V0.1_4	Only identified by site	Reverse	Potential contaminant	Taxonomy	GOBP name	GOMF name	GOCC name	Peptides	Razor + unique peptides	Unique peptides	Sequence coverage [%]	Unique + razor sequence coverage [%]	Unique sequence coverage [%]	Mol. weight [kDa]	Q-value	Score	Intensity	MS/MS count	Protein IDs	Majority protein IDs	Protein names	Gene names
0	0	0	0	3.61079e+06	4.12612e+06	5.53611e+06	4.84656e+06	6.18484e+06	2.87778e+06	2.68314e+06	5.35391e+06	4.11666e+06	4.10494e+06	3.71618e+06	5.32816e+06								1	1	1	21.6	21.6	21.6	9.7929	0	17.105	539100000	15	sp|P03170|ICP47_HHV11	sp|P03170|ICP47_HHV11
6.92041e+07	3.96181e+07	6.42656e+07	5.80878e+07	4.78454e+07	7.66164e+07	1.37003e+08	6.86327e+07	8.68982e+07	4.37046e+07	4.86174e+07	6.46933e+07	6.24174e+07	5.67809e+07	8.36293e+07	5.37629e+07								10	10	10	37.2	37.2	37.2	40.972	0	323.31	43923000000	345	sp|P03176|KITH_HHV11	sp|P03176|KITH_HHV11
4.13894e+08	3.04621e+08	4.11876e+08	4.05371e+08	4.39857e+08	7.82032e+08	9.82779e+08	5.64017e+08	2.82981e+08	2.51468e+08	3.24046e+08	2.96525e+08	5.56246e+08	6.87178e+08	7.5012e+08	7.63274e+08								7	7	7	27.5	27.5	27.5	51.392	0	323.31	243930000000	798	sp|P04288|GM_HHV11	sp|P04288|GM_HHV11
3.27498e+07	2.70382e+07	4.09041e+07	2.95608e+07	7.65109e+07	9.47382e+07	6.89611e+07	1.02037e+08	9.59839e+07	6.87424e+07	9.47839e+07	6.3826e+07	7.98176e+07	9.45383e+07	1.08679e+08	7.98001e+07								16	16	16	55	55	55	57.196	0	323.31	73381000000	547	sp|P04290|UL13_HHV11	sp|P04290|UL13_HHV11
1.07993e+08	9.28515e+07	1.39871e+08	8.11086e+07	1.6673e+08	2.68935e+08	4.19005e+08	2.7482e+08	2.45714e+08	2.38805e+08	2.06481e+08	2.42006e+08	1.94514e+08	1.68576e+08	1.9866e+08	2.92039e+08								15	15	15	56.6	56.6	56.6	23.933	0	323.31	99769000000	486	sp|P04291|TEG3_HHV11	sp|P04291|TEG3_HHV11
329472	384342	407036	146569	247850	377951	879391	147154	0	75157.5	459000	0	310287	549261	416777	236348								7	7	7	7.9	7.9	7.9	136.42	0	24.178	2705900000	17	sp|P04293|DPOL_HHV11	sp|P04293|DPOL_HHV11
4.72289e+07	3.08952e+07	4.59739e+07	3.69858e+07	5.66229e+07	6.63994e+07	1.09663e+08	7.28868e+07	8.57546e+07	8.56271e+07	8.29568e+07	6.90592e+07	6.37602e+07	6.68661e+07	8.17328e+07	8.33372e+07								16	16	16	37.2	37.2	37.2	67.507	0	323.31	79450000000	632	sp|P04294|AN_HHV11	sp|P04294|AN_HHV11
0	0	0	869419	0	0	478095	84285.9	2.04825e+06	1.03055e+06	0	1.20022e+06	493188	518679	0	2.3244e+06								8	8	8	13.3	13.3	13.3	80.922	0	10.921	900390000	20	sp|P04295|TRM3_HHV11	sp|P04295|TRM3_HHV11
1.49952e+07	4.63638e+06	9.16275e+06	8.49024e+06	1.1299e+07	1.99215e+07	2.78835e+07	2.26495e+07	1.11923e+07	1.96286e+07	1.5924e+07	1.29988e+07	1.591e+07	1.64215e+07	1.94611e+07	3.13403e+07								30	30	30	29.8	29.8	29.8	128.35	0	106.33	45780000000	420	sp|P04296|DNBI_HHV11	sp|P04296|DNBI_HHV11
2.4672e+08	2.60461e+08	2.39286e+08	1.79566e+08	5.93318e+08	5.5994e+08	6.39511e+08	7.5803e+08	8.98714e+08	7.14725e+08	5.95835e+08	6.08319e+08	6.24379e+08	7.19473e+08	9.00847e+08	1.0803e+09								21	21	21	49.3	49.3	49.3	52.834	0	323.31	426390000000	1025	sp|P04413|US03_HHV11	sp|P04413|US03_HHV11
1.7859e+07	1.95915e+07	1.81708e+07	1.21438e+07	4.25505e+07	7.77808e+07	5.47031e+07	7.47777e+07	6.38298e+07	5.58855e+07	4.35484e+07	4.93161e+07	4.02962e+07	4.77161e+07	4.74894e+07	5.07104e+07								6	6	6	16.9	16.9	16.9	46.524	0	24.501	23973000000	125	sp|P04485|ICP22_HHV11	sp|P04485|ICP22_HHV11
9.16747e+06	1.28917e+07	1.89041e+07	1.06346e+07	1.78238e+07	2.78472e+07	2.82909e+07	2.32278e+07	1.03953e+07	7.25993e+06	1.78615e+07	1.26433e+07	1.90474e+07	3.05683e+07	1.91018e+07	3.91495e+07								5	5	5	46.6	46.6	46.6	17.757	0	8.6333	3565000000	42	sp|P04487|RNB_HHV11	sp|P04487|RNB_HHV11
1.29494e+08	1.32699e+08	1.44625e+08	1.13683e+08	3.04506e+08	4.68946e+08	4.50588e+08	5.03086e+08	4.23835e+08	3.96276e+08	3.69471e+08	4.58738e+08	6.77504e+08	6.77954e+08	6.94053e+08	6.33007e+08								19	19	19	40.7	40.7	40.7	59.093	0	323.31	374090000000	835	sp|P04488|GE_HHV11	sp|P04488|GE_HHV11
3.28447e+07	3.03801e+07	4.65569e+07	4.33994e+07	4.81547e+06	7.88679e+06	5.59842e+06	7.79515e+06	1.79051e+06	1.916e+06	811487	1.99739e+06	1.49362e+06	4.65675e+06	3.74754e+06	5.26421e+06								15	15	15	24.3	24.3	24.3	90.365	0	205.85	15418000000	157	sp|P06477|GH_HHV11	sp|P06477|GH_HHV11
5.55923e+07	952012	1.23823e+06	0	6.37695e+07	8.32983e+07	2.22947e+08	1.22167e+08	2.63167e+08	2.08232e+08	7.47355e+07	8.18552e+07	1.8294e+08	8.00426e+07	1.35562e+08	2.57223e+08								2	2	2	47.8	47.8	47.8	10.027	0	323.31	8220200000	64	sp|P06481|US9_HHV11	sp|P06481|US9_HHV11
1.52106e+07	0	6.11697e+06	3.33016e+06	0	5.87522e+07	0	3.08075e+07	2.2473e+07	4.51379e+07	1.05278e+07	3.46793e+06	4.3495e+07	4.61052e+07	3.68223e+07	7.47057e+07								2	2	2	11.3	11.3	11.3	25.238	0.0021759	3.0195	5280300000	23	sp|P06484|GG_HHV11	sp|P06484|GG_HHV11
7.33469e+08	5.60492e+08	9.00032e+08	5.81287e+08	8.27348e+08	1.11299e+09	9.89422e+08	1.11883e+09	1.0593e+09	8.16837e+08	9.1011e+08	8.37389e+08	8.40752e+08	8.15555e+08	9.4212e+08	1.1153e+09								15	15	15	59.5	59.5	59.5	32.47	0	323.31	550120000000	1524	sp|P06485|US02_HHV11	sp|P06485|US02_HHV11
2.06354e+08	1.48379e+08	1.70292e+08	1.6544e+08	2.91728e+08	4.8816e+08	7.08653e+08	5.40934e+08	5.32884e+08	3.01571e+08	4.55643e+08	3.48845e+08	3.35405e+08	4.02166e+08	4.82744e+08	5.90106e+08								17	17	17	69.9	69.9	69.9	34.055	0	323.31	267740000000	1057	sp|P06486|US10_HHV11	sp|P06486|US10_HHV11
8.7826e+07	1.0591e+08	1.08201e+08	7.71505e+07	6.10575e+07	8.27857e+07	1.37795e+08	8.81602e+07	1.56584e+08	1.08252e+08	4.48823e+07	6.29538e+07	9.1632e+07	1.82462e+08	1.48814e+08	1.49796e+08								9	9	9	40.8	40.8	40.8	41.369	0	323.31	51860000000	265	sp|P06487|GI_HHV11	sp|P06487|GI_HHV11
7376349952	7376349952	7376349952	7.37635e+09	7376349952	7376349952	7376349952	7376349952	7376349952	7376349952	7376349952	7376349952	7376349952	7.37635e+09	7376349952	7.37635e+09								83	83	83	73.9	73.9	73.9	149.08	0	323.31	18921000000000	21439	sp|P06491|MCP_HHV11	sp|P06491|MCP_HHV11
1.60181e+09	1.00772e+09	1.5004e+09	1.31189e+09	4.13913e+09	4.73697e+09	5.89569e+09	5.03035e+09	5.18901e+09	4.7032e+09	4.09134e+09	3.64444e+09	4.66069e+09	4.35318e+09	4.84062e+09	5.63276e+09								26	26	26	65.7	65.7	65.7	54.345	0	323.31	3220300000000	4222	sp|P06492|VP16_HHV11	sp|P06492|VP16_HHV11
2.5043e+08	1.86813e+08	3.38726e+08	2.30143e+08	1.10553e+09	1.06864e+09	1.33432e+09	1.04837e+09	9.19965e+08	1.12162e+09	1.03677e+09	1.01596e+09	1.09303e+09	1.1304e+09	1.12246e+09	1.31573e+09								75	75	75	72.6	72.6	72.6	132.84	0	323.31	2392600000000	5683	sp|P08392|ICP4_HHV11	sp|P08392|ICP4_HHV11
1.51404e+07	9.69764e+06	1.82099e+07	3.94441e+06	8.93752e+08	1.01739e+09	1.58016e+09	1.07566e+09	9.02943e+08	1.06739e+09	7.98906e+08	9.24914e+08	7.81499e+08	8.67965e+08	7.19566e+08	1.05354e+09								37	37	37	59	59	59	78.456	0	323.31	900270000000	1980	sp|P08393|ICP0_HHV11	sp|P08393|ICP0_HHV11
1.47295e+08	1.17007e+08	1.18448e+08	1.23044e+08	1.0949e+08	1.29763e+08	1.96993e+08	1.25212e+08	1.43519e+08	1.08625e+08	1.06863e+08	1.05665e+08	1.16983e+08	1.4515e+08	1.61386e+08	1.90641e+08								50	50	50	59.4	59.4	59.4	124.05	0	323.31	306400000000	1949	sp|P08543|RIR1_HHV11	sp|P08543|RIR1_HHV11
4.1936e+07	4.77387e+07	2.56043e+07	4.88741e+07	1.94818e+07	4.85925e+07	2.88221e+07	4.01243e+07	1.87962e+07	3.58021e+07	4.19481e+07	2.5366e+07	5.49142e+07	4.68593e+07	5.28997e+07	4.79621e+07								10	10	10	39.8	39.8	39.8	36.328	0	37.267	33754000000	142	sp|P10186|UNG_HHV11	sp|P10186|UNG_HHV11
1.38689e+07	6.36489e+06	1.10569e+07	5.60001e+06	5.30496e+07	1.76513e+07	1.2782e+07	5.53193e+07	9.05469e+06	4.00422e+06	1.50775e+07	9.33722e+06	1.15061e+07	1.08046e+07	1.0923e+07	8.78156e+06								23	23	23	35.3	35.3	35.3	98.714	0	134.96	40713000000	330	sp|P10189|HELI_HHV11	sp|P10189|HELI_HHV11
71430520	36585470	47226200	38081640	6.81385e+07	7.66539e+07	8.55831e+07	1.01094e+08	8.23646e+07	7.00981e+07	5.83111e+07	7.66379e+07	6.74323e+07	8.7715e+07	8.08264e+07	1.6085e+08								22	22	22	39.3	39.3	39.3	74.091	0	323.31	107120000000	650	sp|P10190|PORTL_HHV11	sp|P10190|PORTL_HHV11
1.53321e+08	6.88059e+07	1.44894e+08	1.02659e+08	1.07282e+08	1.34327e+08	2.2022e+08	1.17198e+08	1.3545e+08	7.40258e+07	1.34144e+08	1.20171e+08	1.30469e+08	9.63676e+07	1.1023e+08	1.50074e+08								12	12	11	48	48	45.6	33.059	0	323.31	94183000000	560	sp|P10191|CEP1_HHV11	sp|P10191|CEP1_HHV11
1.85488e+08	1.46927e+08	2.53733e+08	2.01817e+08	2.63222e+08	3.40715e+08	3.80542e+08	3.78007e+08	3.08318e+08	2.37017e+08	2.56974e+08	2.36729e+08	2.92849e+08	3.77852e+08	4.77238e+08	4.92143e+08								15	15	15	41.6	41.6	41.6	40.442	0	323.31	170380000000	628	sp|P10200|CEP2_HHV11	sp|P10200|CEP2_HHV11
7.00344e+08	5.40474e+08	6.82317e+08	6.64769e+08	8.73922e+08	9.91018e+08	1.27301e+09	1.07678e+09	1.06704e+09	7.46712e+08	9.17034e+08	8.80364e+08	9.97012e+08	1.02018e+09	1.08291e+09	1.14352e+09								41	41	41	62.3	62.3	62.3	74.581	0	323.31	1365200000000	3572	sp|P10201|CVC1_HHV11	sp|P10201|CVC1_HHV11
3.96492e+09	2.61571e+09	4.59555e+09	3.48358e+09	2.71408e+09	3.05913e+09	4.93173e+09	3.88668e+09	4.32171e+09	2.75115e+09	2.13483e+09	3.80655e+09	3.08677e+09	2.57634e+09	3.10967e+09	3.57715e+09								25	25	25	84.9	84.9	84.9	34.27	0	323.31	2598400000000	3886	sp|P10202|TRX2_HHV11	sp|P10202|TRX2_HHV11
2.10861e+08	1.33913e+08	3.06105e+08	1.54685e+08	5.0674e+08	4.90126e+08	8.85527e+08	5.23003e+08	7.38887e+08	4.72865e+08	5.38705e+08	5.50417e+08	3.93594e+08	5.54625e+08	5.33538e+08	8.56539e+08								30	30	30	66.2	66.2	66.2	57.641	0	323.31	553390000000	1793	sp|P10205|TEG4_HHV11	sp|P10205|TEG4_HHV11
5.21251e+06	3.63563e+06	1.22589e+07	295264	2.1997e+06	8.99848e+06	4.86245e+06	8.35283e+06	8.46951e+06	1.50368e+06	2.55942e+06	2.56127e+06	4.54223e+06	3.75452e+06	1.28945e+07	3.72407e+06								3	3	3	13.4	13.4	13.4	29.476	0	7.7816	3521200000	47	sp|P10208|UL24_HHV11	sp|P10208|UL24_HHV11
4.07717e+08	3.31293e+08	3.60995e+08	1.79816e+08	8.47875e+08	8.44299e+08	1.27639e+09	1.05774e+09	1.01585e+09	9.58472e+08	8.86463e+08	1.01115e+09	8.67773e+08	8.401e+08	8.98004e+08	9.81022e+08								34	34	34	78.8	78.8	78.8	62.669	0	323.31	1000900000000	2999	sp|P10209|CVC2_HHV11	sp|P10209|CVC2_HHV11
3.2246e+08	2.09949e+08	2.3826e+08	2.64403e+08	2.3277e+08	3.10887e+08	4.83216e+08	4.35231e+08	2.83987e+08	3.38068e+08	2.86108e+08	2.49934e+08	2.3182e+08	2.07594e+08	1.98152e+08	2.65445e+08								20	20	20	41.4	41.4	41.4	66.47	0	323.31	270000000000	1291	sp|P10210|SCAF_HHV11	sp|P10210|SCAF_HHV11
8.68306e+07	7.05294e+07	8.11103e+07	6.68808e+07	4.23932e+08	5.49432e+08	6.92735e+08	5.65371e+08	5.74934e+08	4.17054e+08	4.92301e+08	2.98675e+08	4.61698e+08	4.43005e+08	4.91576e+08	6.38554e+08								42	42	42	49.4	49.4	49.4	100.29	0	323.31	767120000000	1774	sp|P10211|GB_HHV11	sp|P10211|GB_HHV11
3.33713e+06	1.00165e+06	3.02671e+06	2.87333e+06	5.23185e+06	9.01451e+06	8.28751e+06	8.35578e+06	1.02417e+07	6.13939e+06	2.67177e+06	2.91455e+06	6.76255e+06	5.20733e+06	5.14556e+06	9.16578e+06								2	2	2	9.8	9.8	9.8	33.953	0	48.999	3336200000	62	sp|P10215|NEC1_HHV11	sp|P10215|NEC1_HHV11
2.35466e+07	1.84961e+07	2.03365e+06	0	2.69044e+07	6.56002e+07	1.95551e+06	1.29162e+06	9.14729e+07	2.52795e+06	2.48273e+06	2.74207e+07	1.25151e+06	1.05877e+06	1.33089e+07	1.90723e+06								3	3	3	23.8	23.8	23.8	14.437	0.0021545	2.9227	4000500000	6	sp|P10217|TRM2_HHV11	sp|P10217|TRM2_HHV11
2.83584e+07	1.53414e+07	1.27612e+07	2.74405e+07	1.05658e+07	3.53552e+07	5.44748e+07	5.04033e+07	3.34887e+07	1.53787e+07	3.17893e+07	1.81538e+07	2.03608e+07	3.89199e+07	3.01825e+07	4.9335e+07								7	7	7	34.2	34.2	34.2	29.79	0	121.17	18771000000	148	sp|P10218|NEC2_HHV11	sp|P10218|NEC2_HHV11
1.99968e+09	1.32667e+09	1.71123e+09	2.42931e+09	2.0766e+09	4.41493e+09	4.76668e+09	3.71114e+09	4.93194e+09	3.85902e+09	3.7859e+09	4.28809e+09	3.66729e+09	2.88115e+09	3.26563e+09	4.43516e+09								9	9	9	91.1	91.1	91.1	12.096	0	323.31	636430000000	863	sp|P10219|SCP_HHV11	sp|P10219|SCP_HHV11
5.63904e+07	5.29035e+07	4.91064e+07	5.13231e+07	9.65541e+08	9.98472e+08	1.09693e+09	9.27423e+08	6.64025e+08	9.48539e+08	9.77325e+08	8.98932e+08	9.21639e+08	9.60357e+08	1.08248e+09	1.03421e+09								153	153	153	57.8	57.8	57.8	335.86	0	323.31	3929100000000	9264	sp|P10220|LTP_HHV11	sp|P10220|LTP_HHV11
1.13458e+08	8.35818e+07	1.21594e+08	9.43381e+07	7.56225e+08	9.04938e+08	8.98955e+08	8.80676e+08	8.75963e+08	8.90263e+08	8.52169e+08	9.11807e+08	8.25109e+08	8.86258e+08	9.76327e+08	1.28048e+09								66	66	66	80.1	80.1	80.1	120.55	0	323.31	1422500000000	4252	sp|P10221|ITP_HHV11	sp|P10221|ITP_HHV11
2.95341e+07	7.35117e+06	2.05455e+07	2.52497e+07	1.42213e+07	1.91573e+07	2.56527e+07	2.0838e+07	9.88215e+06	1.23656e+07	1.33491e+07	1.29316e+07	2.59553e+07	2.06691e+07	1.69227e+07	2.67672e+07								10	10	10	36.8	36.8	36.8	38.019	0	212.73	16063000000	217	sp|P10224|RIR2_HHV11	sp|P10224|RIR2_HHV11
2.00357e+08	1.53033e+08	2.36316e+08	2.36217e+08	4.81849e+08	6.4334e+08	7.3865e+08	6.22453e+08	6.49735e+08	4.56999e+08	5.70621e+08	5.32508e+08	5.81989e+08	6.21484e+08	7.38971e+08	7.13432e+08								29	29	29	63.2	63.2	63.2	54.917	0	323.31	579190000000	1612	sp|P10225|SHUT_HHV11	sp|P10225|SHUT_HHV11
3.40099e+07	3.53106e+07	1.47119e+07	1.9905e+07	9.13967e+06	2.04925e+07	1.48101e+07	1.77701e+07	1.761e+07	7.98024e+06	1.48371e+07	1.64082e+07	2.01227e+07	1.38735e+07	1.55578e+07	1.92525e+07								11	11	11	32.2	32.2	32.2	51.159	0	276.84	15564000000	240	sp|P10226|PAP_HHV11	sp|P10226|PAP_HHV11
6.11803e+07	5.51467e+07	4.46062e+07	2.34025e+07	3.75493e+06	3.03877e+06	1.04867e+07	1.29956e+07	4.58658e+06	1.96542e+06	659916	2.01474e+06	7.60216e+06	1.05676e+07	4.69518e+06	1.76578e+07								8	8	8	23.3	23.3	23.3	54.998	0	67.98	10544000000	124	sp|P10228|GC_HHV11	sp|P10228|GC_HHV11
1.64821e+08	6.95934e+07	3.11581e+07	6.61713e+07	3.1438e+07	6.16929e+07	2.4822e+07	4.39131e+07	0	1.71461e+07	2.37966e+07	3.18342e+07	2.35021e+07	3.26955e+07	1.83082e+07	3.16112e+07								3	3	3	27.9	27.9	27.9	18.18	0	170.35	13560000000	67	sp|P10229|EV45_HHV11	sp|P10229|EV45_HHV11
5.38435e+08	4.90253e+08	6.13751e+08	6.03177e+08	2.29843e+09	2.80977e+09	2.79342e+09	3.17555e+09	3.02795e+09	3.43658e+09	2.63389e+09	2.8007e+09	3.20172e+09	3.20904e+09	3.34567e+09	2.92373e+09								50	50	50	72.3	72.3	72.3	78.24	0	323.31	3225300000000	6607	sp|P10230|TEG1_HHV11	sp|P10230|TEG1_HHV11
1.48643e+09	9.33098e+08	1.45762e+09	1.25227e+09	3.05194e+09	4.3068e+09	5.7159e+09	4.29845e+09	3.83796e+09	3.53718e+09	3.74749e+09	3.66509e+09	5.83941e+09	5.61171e+09	6.41898e+09	6.71045e+09								59	59	59	84.8	84.8	84.8	73.816	0	323.31	5964500000000	8061	sp|P10231|TEG5_HHV11;tr|A0A1U8C8T2|A0A1U8C8T2_MESAU	sp|P10231|TEG5_HHV11
1.0451e+09	1.08305e+09	1.39737e+09	8.23308e+08	4.76454e+09	5.90155e+09	8.37614e+09	5.4238e+09	6.96221e+09	4.57913e+09	5.63279e+09	6.64805e+09	6.41964e+09	5.47539e+09	5.62153e+09	7.86947e+09								30	30	30	83.4	83.4	83.4	32.254	0	323.31	2838200000000	4522	sp|P10233|VP22_HHV11	sp|P10233|VP22_HHV11
4.37797e+08	2.62668e+08	2.27284e+08	3.34873e+08	6.04472e+08	8.1729e+08	1.01266e+09	1.06018e+09	8.66559e+08	9.44089e+08	7.61817e+08	7.95415e+08	9.09353e+08	7.26057e+08	1.02044e+09	1.11326e+09								23	23	23	76.8	76.8	76.8	39.127	0	323.31	646550000000	1807	sp|P10234|DUT_HHV11	sp|P10234|DUT_HHV11
1.3792e+08	8.10514e+07	1.09689e+08	9.16866e+07	2.41851e+08	2.7591e+08	5.14751e+08	3.99288e+08	3.19118e+08	2.89979e+08	2.52585e+08	2.81609e+08	2.82515e+08	2.8786e+08	3.0366e+08	3.93951e+08								11	11	11	58.2	58.2	58.2	25.47	0	323.31	140960000000	570	sp|P10235|TEG7_HHV11	sp|P10235|TEG7_HHV11
2.14638e+06	2.26138e+06	2.51191e+06	2.31415e+06	3.18577e+06	5.1965e+06	6.95398e+06	5.22127e+06	3.90859e+06	3.28568e+06	4.0997e+06	5.43405e+06	2.67945e+06	3.75313e+06	5.82031e+06	5.39089e+06								17	17	17	21.4	21.4	21.4	114.42	0	95.628	9395800000	153	sp|P10236|PRIM_HHV11	sp|P10236|PRIM_HHV11
7.60456e+07	7.20787e+07	1.10017e+08	9.10495e+07	2.57703e+08	3.18399e+08	2.12356e+08	3.28623e+08	2.86882e+08	3.19166e+08	2.63206e+08	2.025e+08	3.25295e+08	3.00781e+08	3.24064e+08	3.24016e+08								22	22	22	59.8	59.8	59.8	55.252	0	323.31	195530000000	794	sp|P10238|ICP27_HHV11	sp|P10238|ICP27_HHV11
7.41544e+07	1.97587e+07	6.49696e+07	3.35969e+07	3.8898e+07	7.50226e+07	9.50626e+07	8.8596e+07	1.07811e+08	5.85184e+07	6.31475e+07	8.47491e+07	5.2139e+07	6.32638e+07	8.45065e+07	9.37217e+07								7	7	7	41.9	41.9	41.9	20.492	0	266.84	26793000000	177	sp|P10239|TEG6_HHV11	sp|P10239|TEG6_HHV11
2.97646e+07	3.20733e+07	4.2669e+07	1.23537e+07	1.68958e+08	3.17264e+08	5.41625e+08	3.09083e+08	4.06361e+08	2.90824e+08	2.74075e+08	2.81573e+08	3.09057e+08	3.03352e+08	3.68008e+08	5.09714e+08								6	6	6	41.1	41.1	41.1	21.183	0	323.31	61263000000	266	sp|P10240|UL56_HHV11	sp|P10240|UL56_HHV11
2.43958e+09	2.15152e+09	1.59145e+09	2.22713e+09	1.49066e+09	2.40944e+09	2.47284e+09	2.36779e+09	2.06353e+09	2.63572e+09	1.83083e+09	1.7857e+09	1.94855e+09	1.89293e+09	2.4462e+09	2.19176e+09								25	25	25	61.3	61.3	61.3	50.263	0	323.31	1689500000000	2830	sp|P32888|TRX1_HHV11	sp|P32888|TRX1_HHV11
6.23247e+07	3.98808e+07	5.90712e+07	5.30106e+07	1.42026e+07	3.501e+07	2.94103e+07	1.80644e+07	1.82738e+07	9.82806e+06	1.19482e+07	2.08388e+07	7.07306e+06	2.3004e+06	3.36049e+06	9.47414e+06								4	4	4	16	16	16	37.572	0	169.49	16351000000	82	sp|P68331|GK_HHV11	sp|P68331|GK_HHV11
8.40067e+07	1.55867e+08	1.29421e+08	1.21029e+08	2.61837e+07	3.80713e+07	6.02919e+07	4.41005e+07	3.32834e+07	4.09607e+07	2.75147e+07	3.44252e+07	4.65318e+07	4.44727e+07	4.82994e+07	4.34461e+07								11	11	11	36.5	36.5	36.5	43.346	0	323.31	36733000000	177	sp|Q69091|GD_HHV11	sp|Q69091|GD_HHV11

## Sheet: 6. iBAQs log2 imputated
D_1	D_2	D_3	D_4	V1_1	V1_2	V1_3	V1_4	V0.5_1	V0.5_2	V0.5_3	V0.5_4	V0.1_1	V0.1_2	V0.1_3	V0.1_4	Only identified by site	Reverse	Potential contaminant	Taxonomy	GOBP name	GOMF name	GOCC name	Taxonomy manual	Peptides	Razor + unique peptides	Unique peptides	Sequence coverage [%]	Unique + razor sequence coverage [%]	Unique sequence coverage [%]	Mol. weight [kDa]	Q-value	Score	Intensity	MS/MS count	Protein IDs	Majority protein IDs	Protein names	Gene names	Description	type	other name
26.09	25.1248	25.4931	25.1826	26.022	26.1919	26.3508	26.5911	26.2955	26.0629	25.7973	26.1916	26.0069	26.3863	26.2683	27.2611								viral	22	22	22	39.3	39.3	39.3	74.091	0	323.31	107120000000	650	sp|P10190|PORTL_HHV11	sp|P10190|PORTL_HHV11			Portal protein	Capsid	UL6
29.3835	29.0096	29.3459	29.3083	29.7029	29.8843	30.2456	30.0041	29.991	29.476	29.7724	29.7135	29.893	29.9262	30.0123	30.0908								viral	41	41	41	62.3	62.3	62.3	74.581	0	323.31	1365200000000	3572	sp|P10201|CVC1_HHV11	sp|P10201|CVC1_HHV11			Capsid vertex component 1 UL17	Capsid associated	UL17
28.603	28.3035	28.4274	27.4219	29.6593	29.6532	30.2494	29.9783	29.92	29.8362	29.7235	29.9133	29.6927	29.646	29.7421	29.8697								viral	34	34	34	78.8	78.8	78.8	62.669	0	323.31	1000900000000	2999	sp|P10209|CVC2_HHV11	sp|P10209|CVC2_HHV11			Capsid vertex component 2 UL25	Capsid associated	UL25
25.4932	24.8809	25.4543	25.1405	25.7549	25.9847	26.7085	26.1192	26.3537	26.3516	26.3059	26.0413	25.9262	25.9948	26.2844	26.3125								viral	16	16	16	37.2	37.2	37.2	67.507	0	323.31	79450000000	632	sp|P04294|AN_HHV11	sp|P04294|AN_HHV11			Alkaline nuclease	DNA replication	UL12
21.0335	21.1088	21.2604	21.1421	21.6032	22.3091	22.7294	22.316	21.8982	21.6478	21.9671	22.3736	21.3535	21.8397	22.4727	22.3621								viral	17	17	17	21.4	21.4	21.4	114.42	0	95.628	9395800000	153	sp|P10236|PRIM_HHV11	sp|P10236|PRIM_HHV11			DNA primase	DNA replication	UL52
26.3717	26.0717	26.2734	25.9951	28.6593	29.0334	29.3677	29.0746	29.0988	28.6357	28.875	28.154	28.7824	28.7227	28.8728	29.2502								viral	42	42	42	49.4	49.4	49.4	100.29	0	323.31	767120000000	1774	sp|P10211|GB_HHV11	sp|P10211|GB_HHV11			Envelope glycoprotein B	Envelope	gB
25.8666	25.7168	25.4107	24.4802	21.8404	21.5351	23.3221	23.6315	22.129	20.9064	19.3319	20.9422	22.858	23.3331	22.1627	24.0738								viral	8	8	8	23.3	23.3	23.3	54.998	0	67.98	10544000000	124	sp|P10228|GC_HHV11	sp|P10228|GC_HHV11			Envelope glycoprotein C	Envelope	gC
26.324	27.2157	26.9475	26.8508	24.6422	25.1822	25.8455	25.3943	24.9883	25.2877	24.7137	25.037	25.4717	25.4064	25.5255	25.3727								viral	11	11	11	36.5	36.5	36.5	43.346	0	323.31	36733000000	177	sp|Q69091|GD_HHV11	sp|Q69091|GD_HHV11			Envelope glycoprotein D	Envelope	gD
26.9483	26.9836	27.1077	26.7604	28.1819	28.8048	28.7472	28.9062	28.6589	28.5619	28.4609	28.7731	29.3357	29.3366	29.3705	29.2376								viral	19	19	19	40.7	40.7	40.7	59.093	0	323.31	374090000000	835	sp|P04488|GE_HHV11	sp|P04488|GE_HHV11			Envelope glycoprotein E	Envelope	gE
24.9692	24.8566	25.4725	25.3712	22.1992	22.911	22.4166	22.8941	20.7719	20.8697	19.6302	20.9297	20.5104	22.1509	21.8375	22.3278								viral	15	15	15	24.3	24.3	24.3	90.365	0	205.85	15418000000	157	sp|P06477|GH_HHV11	sp|P06477|GH_HHV11			Envelope glycoprotein H	Envelope	gH
25.8933	25.2492	25.816	25.6598	23.7597	25.0613	24.8098	24.1066	24.1233	23.2285	23.5103	24.3128	22.7539	21.1335	21.6802	23.1756								viral	4	4	4	16	16	16	37.572	0	169.49	16351000000	82	sp|P68331|GK_HHV11	sp|P68331|GK_HHV11			Envelope glycoprotein K	Envelope	gK
26.7576	26.3167	26.8575	26.4913	29.4942	29.7532	29.7437	29.714	29.7063	29.7297	29.6666	29.7642	29.62	29.7232	29.8628	30.254								viral	66	66	66	80.1	80.1	80.1	120.55	0	323.31	1422500000000	4252	sp|P10221|ITP_HHV11	sp|P10221|ITP_HHV11			Inner tegument protein	Inner tegument	UL37
25.7489	25.6569	25.5494	25.6131	29.8468	29.8951	30.0308	29.7887	29.3067	29.8211	29.8643	29.7436	29.7796	29.839	30.0117	29.9459								viral	153	153	153	57.8	57.8	57.8	335.86	0	323.31	3929100000000	9264	sp|P10220|LTP_HHV11	sp|P10220|LTP_HHV11			Large tegument protein deneddylase	Inner tegument	UL36
27.8783	27.9565	27.8342	27.4199	29.1442	29.0607	29.2524	29.4977	29.7433	29.4128	29.1503	29.1803	29.2178	29.4224	29.7467	30.0088								viral	21	21	21	49.3	49.3	49.3	52.834	0	323.31	426390000000	1025	sp|P04413|US03_HHV11	sp|P04413|US03_HHV11			Serine/threonine-protein kinase US3	Inner tegument	US3
23.1281	23.6199	24.1722	23.3423	24.0873	24.731	24.7538	24.4694	23.3094	22.7915	24.0903	23.5919	24.1831	24.8655	24.1872	25.2225								viral	5	5	5	46.6	46.6	46.6	17.757	0	8.6333	3565000000	42	sp|P04487|RNB_HHV11	sp|P04487|RNB_HHV11			Accessory factor US11	Major tegument	US11
29.0042	28.8689	29.1931	29.168	31.098	31.3878	31.3794	31.5644	31.4957	31.6783	31.2945	31.3831	31.5762	31.5795	31.6396	31.4452								viral	50	50	50	72.3	72.3	72.3	78.24	0	323.31	3225300000000	6607	sp|P10230|TEG1_HHV11	sp|P10230|TEG1_HHV11			Tegument protein UL46	Major tegument	VP11/12
30.4692	29.7975	30.441	30.2219	31.5071	32.004	32.4123	32.0012	31.8377	31.72	31.8033	31.7712	32.4432	32.3858	32.5797	32.6438								viral	59	59	59	84.8	84.8	84.8	73.816	0	323.31	5964500000000	8061	sp|P10231|TEG5_HHV11;tr|A0A1U8C8T2|A0A1U8C8T2_MESAU	sp|P10231|TEG5_HHV11			Tegument protein UL47	Major tegument	VP13/14
30.5771	29.9084	30.4827	30.289	31.9467	32.1413	32.457	32.228	32.2728	32.131	31.9299	31.7631	32.1179	32.0194	32.1725	32.3912								viral	26	26	26	65.7	65.7	65.7	54.345	0	323.31	3220300000000	4222	sp|P06492|VP16_HHV11	sp|P06492|VP16_HHV11			Tegument protein VP16	Major tegument	VP16
29.961	30.0125	30.3801	29.6169	32.1497	32.4584	32.9636	32.3367	32.6969	32.0924	32.3912	32.6303	32.5798	32.3503	32.3883	32.8736								viral	30	30	30	83.4	83.4	83.4	32.254	0	323.31	2838200000000	4522	sp|P10233|VP22_HHV11	sp|P10233|VP22_HHV11			Tegument protein VP22	Major tegument	VP22
17.7083	17.4418	16.5794	16.9051	21.7839	21.9764	22.4004	22.2085	22.5603	21.4565	21.3555	22.3522	21.973	21.9689	21.8254	22.3452								viral	1	1	1	21.6	21.6	21.6	9.7929	0	17.105	539100000	15	sp|P03170|ICP47_HHV11	sp|P03170|ICP47_HHV11			ICP47 protein	Other	ICP47
26.1804	26.1031	26.7132	26.4401	27.9411	28.2463	27.6619	28.2919	28.0959	28.2497	27.9716	27.5933	28.2772	28.1641	28.2717	28.2715								viral	22	22	22	59.8	59.8	59.8	55.252	0	323.31	195530000000	794	sp|P10238|ICP27_HHV11	sp|P10238|ICP27_HHV11			mRNA export factor	Other	UL54
21.6702	19.934	21.5293	21.4543	22.3189	23.1038	22.9825	22.9943	23.2879	22.5497	21.3494	21.4748	22.6891	22.3121	22.2949	23.1278								viral	2	2	2	9.8	9.8	9.8	33.953	0	48.999	3336200000	62	sp|P10215|NEC1_HHV11	sp|P10215|NEC1_HHV11			Nuclear egress protein 1 UL31	Other	UL31
24.8271	24.9349	25.3467	23.5584	27.3321	28.2411	29.0127	28.2034	28.5982	28.1156	28.03	28.0689	28.2033	28.1764	28.4552	28.9251								viral	6	6	6	41.1	41.1	41.1	21.183	0	323.31	61263000000	266	sp|P10240|UL56_HHV11	sp|P10240|UL56_HHV11			Protein UL56 (membrane domain)	Other	UL56
24.0901	24.2237	24.1151	23.5337	25.3427	26.2129	25.7051	26.1561	25.9277	25.736	25.3761	25.5556	25.2641	25.508	25.5011	25.5958								viral	6	6	6	16.9	16.9	16.9	46.524	0	24.501	23973000000	125	sp|P04485|ICP22_HHV11	sp|P04485|ICP22_HHV11			Transcriptional regulator ICP22	Other	ICP22
27.4668	27.1305	27.9187	27.5885	27.9717	28.344	28.5035	28.4938	28.1998	27.8204	27.937	27.8187	28.1256	28.4932	28.8301	28.8745								viral	15	15	15	41.6	41.6	41.6	40.442	0	323.31	170380000000	628	sp|P10200|CEP2_HHV11	sp|P10200|CEP2_HHV11			Cytoplasmic envelopment protein 2	Other tegument	UL16
23.8519	23.2092	24.1182	21.9114	29.7353	29.9222	30.5574	30.0026	29.7501	29.9914	29.5735	29.7847	29.5417	29.6931	29.4226	29.9726								viral	37	37	37	59	59	59	78.456	0	323.31	900270000000	1980	sp|P08393|ICP0_HHV11	sp|P08393|ICP0_HHV11			E3 ubiquitin-protein ligase ICP0	Other tegument	ICP0
27.8998	27.477	28.3355	27.778	30.0421	29.9931	30.3135	29.9655	29.777	30.0629	29.9494	29.9202	30.0257	30.0742	30.064	30.2932								viral	75	75	75	72.6	72.6	72.6	132.84	0	323.31	2392600000000	5683	sp|P08392|ICP4_HHV11	sp|P08392|ICP4_HHV11			Major viral transcription factor ICP4	Other tegument	ICP4
26.6864	26.4684	27.0595	26.2734	27.3129	28.0027	28.6424	28.0339	27.8724	27.8313	27.6214	27.8505	27.5353	27.3288	27.5657	28.1216								viral	15	15	15	56.6	56.6	56.6	23.933	0	323.31	99769000000	486	sp|P04291|TEG3_HHV11	sp|P04291|TEG3_HHV11			Tegument protein UL14	Other tegument	UL14
27.6517	26.9967	28.1895	27.2048	28.9167	28.8686	29.722	28.9622	29.4608	28.8169	29.0049	29.0359	28.5521	29.0469	28.991	29.6739								viral	30	30	30	66.2	66.2	66.2	57.641	0	323.31	553390000000	1793	sp|P10205|TEG4_HHV11	sp|P10205|TEG4_HHV11			Tegument protein UL21	Other tegument	UL21
27.0393	26.2723	26.7088	26.4502	27.8495	28.0396	28.9393	28.5729	28.2495	28.1114	27.9122	28.0691	28.0737	28.1008	28.1779	28.5534								viral	11	11	11	58.2	58.2	58.2	25.47	0	323.31	140960000000	570	sp|P10235|TEG7_HHV11	sp|P10235|TEG7_HHV11			Tegument protein UL51	Other tegument	UL51
27.6205	27.1447	27.3434	27.3017	28.12	28.8628	29.4005	29.0109	28.9892	28.1679	28.7633	28.378	28.3213	28.5832	28.8467	29.1364								viral	17	17	17	69.9	69.9	69.9	34.055	0	323.31	267740000000	1057	sp|P06486|US10_HHV11	sp|P06486|US10_HHV11			Virion protein US10	Other tegument	US10
28.7057	27.9687	27.7599	28.319	29.1711	29.6063	29.9155	29.9817	29.6907	29.8143	29.5049	29.5671	29.7603	29.4355	29.9265	30.0521								viral	23	23	23	76.8	76.8	76.8	39.127	0	323.31	646550000000	1807	sp|P10234|DUT_HHV11	sp|P10234|DUT_HHV11			Deoxyuridine 5'-triphosphate nucleotidohydrolase	Tegument with enzymatic activity	UL50
24.965	24.6885	25.2857	24.8172	26.1892	26.4974	26.0393	26.6045	26.5163	26.0347	26.4981	25.9276	26.2502	26.4944	26.6955	26.2499								viral	16	16	16	55	55	55	57.196	0	323.31	73381000000	547	sp|P04290|UL13_HHV11	sp|P04290|UL13_HHV11			Serine/threonine-protein kinase UL13	Tegument with enzymatic activity	UL13
27.578	27.1893	27.8161	27.8155	28.844	29.261	29.4603	29.2134	29.2753	28.7676	29.088	28.9882	29.1164	29.2111	29.4609	29.4102								viral	29	29	29	63.2	63.2	63.2	54.917	0	323.31	579190000000	1612	sp|P10225|SHUT_HHV11	sp|P10225|SHUT_HHV11			Virion host shutoff protein	Tegument with enzymatic activity	UL41
32.7803	32.7803	32.7803	32.7803	32.7803	32.7803	32.7803	32.7803	32.7803	32.7803	32.7803	32.7803	32.7803	32.7803	32.7803	32.7803								viral	83	83	83	73.9	73.9	73.9	149.08	0	323.31	18921000000000	21439	sp|P06491|MCP_HHV11	sp|P06491|MCP_HHV11			Major capsid protein VP5	Capsid	VP5
28.2645	27.6455	27.828	27.9782	27.7943	28.2118	28.8481	28.6972	28.0812	28.3327	28.092	27.897	27.7884	27.6292	27.562	27.9838								viral	20	20	20	41.4	41.4	41.4	66.47	0	323.31	270000000000	1291	sp|P10210|SCAF_HHV11	sp|P10210|SCAF_HHV11			Scaffold protein	Capsid	VP21 / VP22a / VP24
31.184	31.0027	30.5677	31.0525	30.4733	31.166	31.2035	31.1409	30.9425	31.2955	30.7698	30.7338	30.8598	30.818	31.1879	31.0294								viral	25	25	25	61.3	61.3	61.3	50.263	0	323.31	1689500000000	2830	sp|P32888|TRX1_HHV11	sp|P32888|TRX1_HHV11			Triplex capsid protein 1 VP19c	Capsid	VP19c
31.8846	31.2846	32.0976	31.6979	31.3378	31.5105	32.1994	31.8559	32.009	31.3574	30.9915	31.8258	31.5234	31.2627	31.5341	31.7362								viral	25	25	25	84.9	84.9	84.9	34.27	0	323.31	2598400000000	3886	sp|P10202|TRX2_HHV11	sp|P10202|TRX2_HHV11			Triplex capsid protein 2 VP23	Capsid	VP23
30.8971	30.3052	30.6724	31.1779	30.9516	32.0397	32.1503	31.7892	32.1995	31.8456	31.818	31.9977	31.7721	31.424	31.6047	32.0463								viral	9	9	9	91.1	91.1	91.1	12.096	0	323.31	636430000000	863	sp|P10219|SCP_HHV11	sp|P10219|SCP_HHV11			Small capsomere-interacting protein VP26	Capsid associated	VP26
24.489	24.1407	20.9556	17.557	24.6813	25.9672	20.8991	20.3008	26.4468	21.2695	21.2435	24.7088	20.2552	20.014	23.6659	20.863								viral	3	3	3	23.8	23.8	23.8	14.437	0.0021545	2.9227	4000500000	6	sp|P10217|TRM2_HHV11	sp|P10217|TRM2_HHV11			Tripartite terminase subunit 2	Capsid associated	TRM2
16.6953	17.4403	16.114	19.7297	16.6227	15.0335	18.8669	16.363	20.966	19.975	17.9232	20.1949	18.9118	18.9845	14.8659	21.1484								viral	8	8	8	13.3	13.3	13.3	80.922	0	10.921	900390000	20	sp|P04295|TRM3_HHV11	sp|P04295|TRM3_HHV11			Tripartite terminase subunit 3	Capsid associated	TRM3
18.3298	18.552	18.6348	17.1612	17.9191	18.5278	19.7461	17.167	16.2268	16.1976	18.8081	17.4916	18.2432	19.0671	18.6689	17.8506								viral	7	7	7	7.9	7.9	7.9	136.42	0	24.178	2705900000	17	sp|P04293|DPOL_HHV11	sp|P04293|DPOL_HHV11			DNA polymerase catalytic subunit	DNA replication	UL30
25.0195	25.0736	23.8105	24.2466	23.1237	24.2886	23.8201	24.083	24.0699	22.928	23.8227	23.9679	24.2623	23.7258	23.8911	24.1985								viral	11	11	11	32.2	32.2	32.2	51.159	0	276.84	15564000000	240	sp|P10226|PAP_HHV11	sp|P10226|PAP_HHV11			DNA polymerase processivity factor	DNA replication	UL42
23.7254	22.6017	23.3984	22.417	25.6608	24.0733	23.6076	25.7213	23.1102	21.9331	23.8459	23.1546	23.4559	23.3651	23.3809	23.066								viral	23	23	23	35.3	35.3	35.3	98.714	0	134.96	40713000000	330	sp|P10189|HELI_HHV11	sp|P10189|HELI_HHV11			DNA replication helicase	DNA replication	HELI
23.838	22.1446	23.1273	23.0174	23.4297	24.2478	24.7329	24.433	23.416	24.2265	23.9247	23.6319	23.9234	23.9691	24.2141	24.9015								viral	30	30	30	29.8	29.8	29.8	128.35	0	106.33	45780000000	420	sp|P04296|DNBI_HHV11	sp|P04296|DNBI_HHV11			Major DNA-binding protein	DNA replication	ICP8
27.1341	26.802	26.8197	26.8746	26.7062	26.9513	27.5536	26.8998	27.0967	26.6948	26.6712	26.6549	26.8017	27.113	27.2659	27.5063								viral	50	50	50	59.4	59.4	59.4	124.05	0	323.31	306400000000	1949	sp|P08543|RIR1_HHV11	sp|P08543|RIR1_HHV11			Ribonucleoside-diphosphate reductase large subunit	DNA replication	RIR1
24.8159	22.8095	24.2923	24.5898	23.7616	24.1914	24.6126	24.3127	23.2364	23.5598	23.6702	23.6244	24.6295	24.301	24.0125	24.674								viral	10	10	10	36.8	36.8	36.8	38.019	0	212.73	16063000000	217	sp|P10224|RIR2_HHV11	sp|P10224|RIR2_HHV11			Ribonucleoside-diphosphate reductase small subunit	DNA replication	RIR2
25.3217	25.5087	24.6099	25.5426	24.2156	25.5342	24.7807	25.258	24.1639	25.0935	25.3221	24.5964	25.7107	25.4818	25.6568	25.5154								viral	10	10	10	39.8	39.8	39.8	36.328	0	37.267	33754000000	142	sp|P10186|UNG_HHV11	sp|P10186|UNG_HHV11			Uracil-DNA glycosylase	DNA replication	UL2
23.8586	16.7205	22.5444	21.6672	17.9904	25.8081	17.3058	24.8768	24.4217	25.4278	23.3277	21.7256	25.3743	25.4584	25.1341	26.1547								viral	2	2	2	11.3	11.3	11.3	25.238	0.0021759	3.0195	5280300000	23	sp|P06484|GG_HHV11	sp|P06484|GG_HHV11			Envelope glycoprotein G	Envelope	gG
26.3881	26.6583	26.6891	26.2012	25.8637	26.3029	27.038	26.3936	27.2224	26.6898	25.4196	25.9078	26.4493	27.443	27.1489	27.1584								viral	9	9	9	40.8	40.8	40.8	41.369	0	323.31	51860000000	265	sp|P06487|GI_HHV11	sp|P06487|GI_HHV11			Envelope glycoprotein I	Envelope	gI
28.6247	28.1824	28.6176	28.5947	28.7125	29.5427	29.8723	29.0712	28.0761	27.9058	28.2716	28.1436	29.0511	29.3561	29.4825	29.5076								viral	7	7	7	27.5	27.5	27.5	51.392	0	323.31	243930000000	798	sp|P04288|GM_HHV11	sp|P04288|GM_HHV11			Envelope glycoprotein M	Envelope	gM
27.2963	26.0524	24.8931	25.9797	24.906	25.8786	24.5651	25.3881	16.3189	24.0314	24.5043	24.9241	24.4863	24.9626	24.126	24.9139								viral	3	3	3	27.9	27.9	27.9	18.18	0	170.35	13560000000	67	sp|P10229|EV45_HHV11	sp|P10229|EV45_HHV11			Envelope protein UL45	Envelope	UL45
25.7284	19.8606	20.2399	15.9486	25.9264	26.3118	27.7321	26.8643	27.9714	27.6336	26.1553	26.2866	27.4468	26.2543	27.0144	27.9384								viral	2	2	2	47.8	47.8	47.8	10.027	0	323.31	8220200000	64	sp|P06481|US9_HHV11	sp|P06481|US9_HHV11			Envelope protein US9	Envelope	US9
24.7573	23.8709	23.6053	24.7098	23.3329	25.0754	25.6991	25.587	24.9972	23.8744	24.922	24.1138	24.2793	25.214	24.8472	25.5561								viral	7	7	7	34.2	34.2	34.2	29.79	0	121.17	18771000000	148	sp|P10218|NEC2_HHV11	sp|P10218|NEC2_HHV11			Nuclear egress protein 2 UL34	Other	UL34
22.3135	21.7938	23.5473	18.1716	21.0689	23.1012	22.2133	22.9938	23.0138	20.5201	21.2874	21.2884	22.115	21.8402	23.6203	21.8284								viral	3	3	3	13.4	13.4	13.4	29.476	0	7.7816	3521200000	47	sp|P10208|UL24_HHV11	sp|P10208|UL24_HHV11			Protein UL24 (nuclear protein)	Other	UL24
27.192	26.036	27.1104	26.6133	26.6768	27.0012	27.7144	26.8044	27.0132	26.1415	26.9992	26.8405	26.9591	26.522	26.7159	27.1611								viral	12	12	11	48	48	45.6	33.059	0	323.31	94183000000	560	sp|P10191|CEP1_HHV11	sp|P10191|CEP1_HHV11			Cytoplasmic envelopment protein 1	Other tegument	UL7
29.4502	29.0621	29.7454	29.1147	29.6239	30.0518	29.882	30.0593	29.9805	29.6055	29.7615	29.6413	29.6471	29.6032	29.8113	30.0548								viral	15	15	15	59.5	59.5	59.5	32.47	0	323.31	550120000000	1524	sp|P06485|US02_HHV11	sp|P06485|US02_HHV11			Protein US2	Other tegument	US2
26.144	24.236	25.9533	25.0018	25.2132	26.1608	26.5024	26.4007	26.6839	25.8024	25.9122	26.3367	25.6359	25.9149	26.3326	26.4819								viral	7	7	7	41.9	41.9	41.9	20.492	0	266.84	26793000000	177	sp|P10239|TEG6_HHV11	sp|P10239|TEG6_HHV11			Tegument protein UL55	Other tegument	UL55
26.0444	25.2397	25.9375	25.7917	25.5119	26.1912	27.0296	26.0324	26.3728	25.3813	25.535	25.9471	25.8954	25.7589	26.3175	25.6801								viral	10	10	10	37.2	37.2	37.2	40.972	0	323.31	43923000000	345	sp|P03176|KITH_HHV11	sp|P03176|KITH_HHV11			Thymidine kinase UL23	Tegument with enzymatic activity	TK

## Sheet: 7. Fig. 8 & S8. iBAQs log10
D_1	D_2	D_3	D_4	V1_1	V1_2	V1_3	V1_4	V0.5_1	V0.5_2	V0.5_3	V0.5_4	V0.1_1	V0.1_2	V0.1_3	V0.1_4	Only identified by site	Reverse	Potential contaminant	Taxonomy	GOBP name	GOMF name	GOCC name	Taxonomy manual	Peptides	Razor + unique peptides	Unique peptides	Sequence coverage [%]	Unique + razor sequence coverage [%]	Unique sequence coverage [%]	Mol. weight [kDa]	Q-value	Score	Intensity	MS/MS count	Protein IDs	Majority protein IDs	Protein names	Gene names	Description	type	other name
7.85388	7.56331	7.67418	7.58072	7.83339	7.88453	7.93239	8.00472	7.91574	7.84571	7.76575	7.88444	7.82887	7.94307	7.90755	8.20642								viral	22	22	22	39.3	39.3	39.3	74.091	0	323.31	107120000000	650	sp|P10190|PORTL_HHV11	sp|P10190|PORTL_HHV11			Portal protein	Capsid	UL6
8.84531	8.73277	8.83399	8.82267	8.94147	8.99608	9.10483	9.03213	9.02818	8.87315	8.96239	8.94466	8.9987	9.00868	9.03459	9.05824								viral	41	41	41	62.3	62.3	62.3	74.581	0	323.31	1365200000000	3572	sp|P10201|CVC1_HHV11	sp|P10201|CVC1_HHV11			Capsid vertex component 1 UL17	Capsid associated	UL17
8.61036	8.52021	8.5575	8.25483	8.92833	8.9265	9.10598	9.02438	9.00683	8.98158	8.94766	9.00481	8.93841	8.92433	8.95328	8.99168								viral	34	34	34	78.8	78.8	78.8	62.669	0	323.31	1000900000000	2999	sp|P10209|CVC2_HHV11	sp|P10209|CVC2_HHV11			Capsid vertex component 2 UL25	Capsid associated	UL25
7.67421	7.48989	7.66251	7.56803	7.75299	7.82216	8.04006	7.86265	7.93326	7.93261	7.91885	7.83922	7.80455	7.82521	7.9124	7.92084								viral	16	16	16	37.2	37.2	37.2	67.507	0	323.31	79450000000	632	sp|P04294|AN_HHV11	sp|P04294|AN_HHV11			Alkaline nuclease	DNA replication	UL12
6.33171	6.35437	6.4	6.36439	6.50321	6.71571	6.84223	6.71778	6.59202	6.51663	6.61275	6.73512	6.42805	6.57439	6.76495	6.73166								viral	17	17	17	21.4	21.4	21.4	114.42	0	95.628	9395800000	153	sp|P10236|PRIM_HHV11	sp|P10236|PRIM_HHV11			DNA primase	DNA replication	UL52
7.93867	7.84837	7.90908	7.8253	8.6273	8.73991	8.84057	8.75233	8.75962	8.62019	8.69223	8.4752	8.66436	8.64641	8.69159	8.8052								viral	42	42	42	49.4	49.4	49.4	100.29	0	323.31	767120000000	1774	sp|P10211|GB_HHV11	sp|P10211|GB_HHV11			Envelope glycoprotein B	Envelope	gB
7.78661	7.74152	7.64939	7.36926	6.5746	6.4827	7.02064	7.1138	6.66149	6.29345	5.81949	6.30422	6.88094	7.02398	6.67165	7.24694								viral	8	8	8	23.3	23.3	23.3	54.998	0	67.98	10544000000	124	sp|P10228|GC_HHV11	sp|P10228|GC_HHV11			Envelope glycoprotein C	Envelope	gC
7.92431	8.19275	8.112	8.08289	7.41803	7.5806	7.78026	7.64444	7.52223	7.61237	7.43956	7.53688	7.66775	7.64809	7.68394	7.63795								viral	11	11	11	36.5	36.5	36.5	43.346	0	323.31	36733000000	177	sp|Q69091|GD_HHV11	sp|Q69091|GD_HHV11			Envelope glycoprotein D	Envelope	gD
8.11225	8.12287	8.16024	8.0557	8.4836	8.67112	8.65378	8.70164	8.6272	8.598	8.56758	8.66156	8.83091	8.8312	8.84139	8.80141								viral	19	19	19	40.7	40.7	40.7	59.093	0	323.31	374090000000	835	sp|P04488|GE_HHV11	sp|P04488|GE_HHV11			Envelope glycoprotein E	Envelope	gE
7.51647	7.48259	7.66798	7.63748	6.68264	6.8969	6.74807	6.89182	6.25298	6.2824	5.90928	6.30046	6.17424	6.66808	6.57375	6.72133								viral	15	15	15	24.3	24.3	24.3	90.365	0	205.85	15418000000	157	sp|P06477|GH_HHV11	sp|P06477|GH_HHV11			Envelope glycoprotein H	Envelope	gH
7.79466	7.60076	7.77138	7.72436	7.15237	7.54419	7.4685	7.25682	7.26183	6.99247	7.0773	7.31887	6.84961	6.3618	6.5264	6.97654								viral	4	4	4	16	16	16	37.572	0	169.49	16351000000	82	sp|P68331|GK_HHV11	sp|P68331|GK_HHV11			Envelope glycoprotein K	Envelope	gK
8.05484	7.92211	8.08491	7.97469	8.87865	8.95662	8.95374	8.94482	8.94249	8.94952	8.93053	8.9599	8.91651	8.94756	8.9896	9.10737								viral	66	66	66	80.1	80.1	80.1	120.55	0	323.31	1422500000000	4252	sp|P10221|ITP_HHV11	sp|P10221|ITP_HHV11			Inner tegument protein	Inner tegument	UL37
7.7512	7.72348	7.69114	7.71031	8.98477	8.99934	9.04018	8.96728	8.82218	8.97706	8.99004	8.95373	8.96456	8.98243	9.03442	9.01461								viral	153	153	153	57.8	57.8	57.8	335.86	0	323.31	3929100000000	9264	sp|P10220|LTP_HHV11	sp|P10220|LTP_HHV11			Large tegument protein deneddylase	Inner tegument	UL36
8.3922	8.41574	8.37892	8.25422	8.77329	8.74814	8.80585	8.87969	8.95362	8.85414	8.77513	8.78413	8.79545	8.85701	8.95465	9.03354								viral	21	21	21	49.3	49.3	49.3	52.834	0	323.31	426390000000	1025	sp|P04413|US03_HHV11	sp|P04413|US03_HHV11			Serine/threonine-protein kinase US3	Inner tegument	US3
6.96225	7.11031	7.27656	7.02672	7.251	7.44478	7.45165	7.36601	7.01684	6.86093	7.25192	7.10186	7.27983	7.48527	7.28107	7.59273								viral	5	5	5	46.6	46.6	46.6	17.757	0	8.6333	3565000000	42	sp|P04487|RNB_HHV11	sp|P04487|RNB_HHV11			Accessory factor US11	Major tegument	US11
8.73113	8.69042	8.78799	8.78044	9.36143	9.44867	9.44614	9.50182	9.48115	9.53613	9.4206	9.44727	9.50538	9.50638	9.52448	9.46594								viral	50	50	50	72.3	72.3	72.3	78.24	0	323.31	3225300000000	6607	sp|P10230|TEG1_HHV11	sp|P10230|TEG1_HHV11			Tegument protein UL46	Major tegument	VP11/12
9.17214	8.96993	9.16364	9.0977	9.48458	9.63416	9.75708	9.63331	9.5841	9.54866	9.57374	9.56408	9.76637	9.74909	9.80747	9.82675								viral	59	59	59	84.8	84.8	84.8	73.816	0	323.31	5964500000000	8061	sp|P10231|TEG5_HHV11;tr|A0A1U8C8T2|A0A1U8C8T2_MESAU	sp|P10231|TEG5_HHV11			Tegument protein UL47	Major tegument	VP13/14
9.20461	9.00334	9.17621	9.1179	9.61691	9.6755	9.77053	9.7016	9.71508	9.67239	9.61187	9.56163	9.66845	9.63881	9.6849	9.75072								viral	26	26	26	65.7	65.7	65.7	54.345	0	323.31	3220300000000	4222	sp|P06492|VP16_HHV11	sp|P06492|VP16_HHV11			Tegument protein VP16	Major tegument	VP16
9.01916	9.03465	9.14531	8.91556	9.67802	9.77097	9.92304	9.7343	9.84275	9.66078	9.75072	9.82269	9.80751	9.73842	9.74985	9.89595								viral	30	30	30	83.4	83.4	83.4	32.254	0	323.31	2838200000000	4522	sp|P10233|VP22_HHV11	sp|P10233|VP22_HHV11			Tegument protein VP22	Major tegument	VP22
5.33073	5.25052	4.99091	5.08895	6.5576	6.61554	6.7432	6.68543	6.79133	6.45906	6.42864	6.72867	6.61455	6.61331	6.5701	6.72658								viral	1	1	1	21.6	21.6	21.6	9.7929	0	17.105	539100000	15	sp|P03170|ICP47_HHV11	sp|P03170|ICP47_HHV11			ICP47 protein	Other	ICP47
7.88107	7.85781	8.04146	7.95928	8.41112	8.50297	8.32707	8.5167	8.4577	8.50402	8.4203	8.30643	8.51228	8.47825	8.51063	8.51057								viral	22	22	22	59.8	59.8	59.8	55.252	0	323.31	195530000000	794	sp|P10238|ICP27_HHV11	sp|P10238|ICP27_HHV11			mRNA export factor	Other	UL54
6.52337	6.00072	6.48097	6.45838	6.71866	6.95494	6.91842	6.92199	7.01037	6.78813	6.4268	6.46457	6.83011	6.71661	6.71143	6.96217								viral	2	2	2	9.8	9.8	9.8	33.953	0	48.999	3336200000	62	sp|P10215|NEC1_HHV11	sp|P10215|NEC1_HHV11			Nuclear egress protein 1 UL31	Other	UL31
7.4737	7.50614	7.63011	7.0918	8.22778	8.50142	8.7337	8.49008	8.60891	8.46363	8.43787	8.44959	8.49004	8.48195	8.56586	8.70733								viral	6	6	6	41.1	41.1	41.1	21.183	0	323.31	61263000000	266	sp|P10240|UL56_HHV11	sp|P10240|UL56_HHV11			Protein UL56 (membrane domain)	Other	UL56
7.25186	7.29207	7.25937	7.08435	7.6289	7.89087	7.73801	7.87377	7.80502	7.7473	7.63897	7.69299	7.60526	7.67866	7.6766	7.7051								viral	6	6	6	16.9	16.9	16.9	46.524	0	24.501	23973000000	125	sp|P04485|ICP22_HHV11	sp|P04485|ICP22_HHV11			Transcriptional regulator ICP22	Other	ICP22
8.26832	8.1671	8.40438	8.30496	8.42032	8.53239	8.5804	8.5775	8.489	8.37478	8.40989	8.37425	8.46664	8.57732	8.67873	8.69209								viral	15	15	15	41.6	41.6	41.6	40.442	0	323.31	170380000000	628	sp|P10200|CEP2_HHV11	sp|P10200|CEP2_HHV11			Cytoplasmic envelopment protein 2	Other tegument	UL16
7.18014	6.98667	7.26031	6.59598	8.95122	9.00749	9.1987	9.03167	8.95566	9.02832	8.9025	8.9661	8.89293	8.9385	8.85707	9.02265								viral	37	37	37	59	59	59	78.456	0	323.31	900270000000	1980	sp|P08393|ICP0_HHV11	sp|P08393|ICP0_HHV11			E3 ubiquitin-protein ligase ICP0	Other tegument	ICP0
8.39869	8.27141	8.52985	8.362	9.04357	9.02883	9.12526	9.02051	8.96377	9.04985	9.01568	9.00688	9.03863	9.05323	9.05017	9.11917								viral	75	75	75	72.6	72.6	72.6	132.84	0	323.31	2392600000000	5683	sp|P08392|ICP4_HHV11	sp|P08392|ICP4_HHV11			Major viral transcription factor ICP4	Other tegument	ICP4
8.03339	7.96779	8.14573	7.90907	8.22201	8.42965	8.62222	8.43905	8.39043	8.37804	8.31488	8.38383	8.28895	8.2268	8.29811	8.46544								viral	15	15	15	56.6	56.6	56.6	23.933	0	323.31	99769000000	486	sp|P04291|TEG3_HHV11	sp|P04291|TEG3_HHV11			Tegument protein UL14	Other tegument	UL14
8.324	8.12682	8.48587	8.18945	8.70478	8.69031	8.9472	8.7185	8.86858	8.67474	8.73135	8.74069	8.59505	8.744	8.72716	8.93275								viral	30	30	30	66.2	66.2	66.2	57.641	0	323.31	553390000000	1793	sp|P10205|TEG4_HHV11	sp|P10205|TEG4_HHV11			Tegument protein UL21	Other tegument	UL21
8.13963	7.90876	8.04016	7.96231	8.38355	8.44077	8.7116	8.60129	8.50395	8.46237	8.40241	8.44965	8.45104	8.45918	8.48239	8.59544								viral	11	11	11	58.2	58.2	58.2	25.47	0	323.31	140960000000	570	sp|P10235|TEG7_HHV11	sp|P10235|TEG7_HHV11			Tegument protein UL51	Other tegument	UL51
8.31461	8.17137	8.23119	8.21864	8.46498	8.68856	8.85043	8.73314	8.72663	8.47939	8.65862	8.54263	8.52557	8.60441	8.68372	8.77093								viral	17	17	17	69.9	69.9	69.9	34.055	0	323.31	267740000000	1057	sp|P06486|US10_HHV11	sp|P06486|US10_HHV11			Virion protein US10	Other tegument	US10
8.64127	8.41941	8.35657	8.52488	8.78138	8.91238	9.00547	9.02538	8.9378	8.97501	8.88185	8.90059	8.95873	8.86097	9.00879	9.04659								viral	23	23	23	76.8	76.8	76.8	39.127	0	323.31	646550000000	1807	sp|P10234|DUT_HHV11	sp|P10234|DUT_HHV11			Deoxyuridine 5'-triphosphate nucleotidohydrolase	Tegument with enzymatic activity	UL50
7.51521	7.43198	7.61177	7.47072	7.88372	7.97652	7.8386	8.00876	7.9822	7.83722	7.97673	7.805	7.9021	7.97561	8.03615	7.902								viral	16	16	16	55	55	55	57.196	0	323.31	73381000000	547	sp|P04290|UL13_HHV11	sp|P04290|UL13_HHV11			Serine/threonine-protein kinase UL13	Tegument with enzymatic activity	UL13
8.3018	8.18479	8.37349	8.37331	8.68291	8.80844	8.86844	8.79411	8.81274	8.65992	8.75635	8.72633	8.76491	8.79343	8.86863	8.85335								viral	29	29	29	63.2	63.2	63.2	54.917	0	323.31	579190000000	1612	sp|P10225|SHUT_HHV11	sp|P10225|SHUT_HHV11			Virion host shutoff protein	Tegument with enzymatic activity	UL41
9.86784	9.86784	9.86784	9.86784	9.86784	9.86784	9.86784	9.86784	9.86784	9.86784	9.86784	9.86784	9.86784	9.86784	9.86784	9.86784								viral	83	83	83	73.9	73.9	73.9	149.08	0	323.31	18921000000000	21439	sp|P06491|MCP_HHV11	sp|P06491|MCP_HHV11			Major capsid protein VP5	Capsid	VP5
8.50848	8.32211	8.37705	8.42227	8.36693	8.4926	8.68414	8.63872	8.4533	8.529	8.45653	8.39782	8.36515	8.31721	8.297	8.42398								viral	20	20	20	41.4	41.4	41.4	66.47	0	323.31	270000000000	1291	sp|P10210|SCAF_HHV11	sp|P10210|SCAF_HHV11			Scaffold protein	Capsid	VP21 / VP22a / VP24
9.38732	9.33274	9.20179	9.34775	9.17338	9.38192	9.3932	9.37434	9.31461	9.4209	9.26265	9.25181	9.28971	9.27713	9.38849	9.34079								viral	25	25	25	61.3	61.3	61.3	50.263	0	323.31	1689500000000	2830	sp|P32888|TRX1_HHV11	sp|P32888|TRX1_HHV11			Triplex capsid protein 1 VP19c	Capsid	VP19c
9.59823	9.41759	9.66234	9.54203	9.43362	9.4856	9.693	9.58958	9.63566	9.43951	9.32936	9.58053	9.4895	9.411	9.49271	9.55354								viral	25	25	25	84.9	84.9	84.9	34.27	0	323.31	2598400000000	3886	sp|P10202|TRX2_HHV11	sp|P10202|TRX2_HHV11			Triplex capsid protein 2 VP23	Capsid	VP23
9.30096	9.12276	9.23331	9.38548	9.31735	9.64492	9.67822	9.56951	9.69302	9.58648	9.57817	9.63226	9.56435	9.45957	9.51397	9.64691								viral	9	9	9	91.1	91.1	91.1	12.096	0	323.31	636430000000	863	sp|P10219|SCP_HHV11	sp|P10219|SCP_HHV11			Small capsomere-interacting protein VP26	Capsid associated	VP26
7.37193	7.26708	6.30828	5.28518	7.42982	7.81691	6.29126	6.11114	7.96129	6.40277	6.39493	7.43808	6.09743	6.0248	7.12414	6.2804								viral	3	3	3	23.8	23.8	23.8	14.437	0.0021545	2.9227	4000500000	6	sp|P10217|TRM2_HHV11	sp|P10217|TRM2_HHV11			Tripartite terminase subunit 2	Capsid associated	TRM2
5.02578	5.25007	4.85078	5.93923	5.00395	4.52554	5.67951	4.92575	6.31138	6.01307	5.39541	6.07926	5.69301	5.7149	4.47509	6.36631								viral	8	8	8	13.3	13.3	13.3	80.922	0	10.921	900390000	20	sp|P04295|TRM3_HHV11	sp|P04295|TRM3_HHV11			Tripartite terminase subunit 3	Capsid associated	TRM3
5.51782	5.58472	5.60963	5.16604	5.39419	5.57744	5.94418	5.16777	4.88474	4.87597	5.66181	5.26549	5.49176	5.73978	5.6199	5.37355								viral	7	7	7	7.9	7.9	7.9	136.42	0	24.178	2705900000	17	sp|P04293|DPOL_HHV11	sp|P04293|DPOL_HHV11			DNA polymerase catalytic subunit	DNA replication	UL30
7.53161	7.5479	7.16767	7.29896	6.96093	7.3116	7.17056	7.24969	7.24576	6.90202	7.17135	7.21506	7.30369	7.14219	7.19195	7.28449								viral	11	11	11	32.2	32.2	32.2	51.159	0	276.84	15564000000	240	sp|P10226|PAP_HHV11	sp|P10226|PAP_HHV11			DNA polymerase processivity factor	DNA replication	UL42
7.14204	6.80379	7.04363	6.74819	7.72468	7.24678	7.1066	7.74288	6.95687	6.60252	7.17833	6.97022	7.06093	7.03361	7.03834	6.94357								viral	23	23	23	35.3	35.3	35.3	98.714	0	134.96	40713000000	330	sp|P10189|HELI_HHV11	sp|P10189|HELI_HHV11			DNA replication helicase	DNA replication	HELI
7.17595	6.66618	6.96203	6.92892	7.05304	7.29932	7.44535	7.35506	7.04892	7.29289	7.20205	7.1139	7.20167	7.21541	7.28917	7.4961								viral	30	30	30	29.8	29.8	29.8	128.35	0	106.33	45780000000	420	sp|P04296|DNBI_HHV11	sp|P04296|DNBI_HHV11			Major DNA-binding protein	DNA replication	ICP8
8.16819	8.06821	8.07353	8.09006	8.03938	8.11315	8.29445	8.09764	8.15691	8.03593	8.02883	8.02393	8.06812	8.16182	8.20787	8.28022								viral	50	50	50	59.4	59.4	59.4	124.05	0	323.31	306400000000	1949	sp|P08543|RIR1_HHV11	sp|P08543|RIR1_HHV11			Ribonucleoside-diphosphate reductase large subunit	DNA replication	RIR1
7.47032	6.86636	7.31272	7.40226	7.15294	7.28233	7.40913	7.31886	6.99485	7.09222	7.12545	7.11165	7.41423	7.31532	7.22847	7.4276								viral	10	10	10	36.8	36.8	36.8	38.019	0	212.73	16063000000	217	sp|P10224|RIR2_HHV11	sp|P10224|RIR2_HHV11			Ribonucleoside-diphosphate reductase small subunit	DNA replication	RIR2
7.62259	7.67887	7.40831	7.68908	7.28963	7.68657	7.45973	7.60341	7.27407	7.55391	7.62271	7.40425	7.73968	7.6708	7.72345	7.6809								viral	10	10	10	39.8	39.8	39.8	36.328	0	37.267	33754000000	142	sp|P10186|UNG_HHV11	sp|P10186|UNG_HHV11			Uracil-DNA glycosylase	DNA replication	UL2
7.18215	5.03336	6.78654	6.52247	5.41564	7.76902	5.20956	7.48866	7.35166	7.65454	7.02234	6.54007	7.63844	7.66375	7.56611	7.87335								viral	2	2	2	11.3	11.3	11.3	25.238	0.0021759	3.0195	5280300000	23	sp|P06484|GG_HHV11	sp|P06484|GG_HHV11			Envelope glycoprotein G	Envelope	gG
7.94362	8.02494	8.03423	7.88734	7.78574	7.91796	8.13923	7.94527	8.19475	8.03444	7.65208	7.79902	7.96205	8.26117	8.17264	8.1755								viral	9	9	9	40.8	40.8	40.8	41.369	0	323.31	51860000000	265	sp|P06487|GI_HHV11	sp|P06487|GI_HHV11			Envelope glycoprotein I	Envelope	gI
8.61689	8.48376	8.61477	8.60785	8.64331	8.89323	8.99246	8.75129	8.45176	8.40048	8.51061	8.47206	8.74527	8.83707	8.87513	8.88268								viral	7	7	7	27.5	27.5	27.5	51.392	0	323.31	243930000000	798	sp|P04288|GM_HHV11	sp|P04288|GM_HHV11			Envelope glycoprotein M	Envelope	gM
8.21701	7.84257	7.49357	7.82067	7.49745	7.79024	7.39484	7.64259	4.91247	7.23416	7.37651	7.50289	7.37111	7.51449	7.26265	7.49984								viral	3	3	3	27.9	27.9	27.9	18.18	0	170.35	13560000000	67	sp|P10229|EV45_HHV11	sp|P10229|EV45_HHV11			Envelope protein UL45	Envelope	UL45
7.74501	5.97864	6.0928	4.801	7.80461	7.92064	8.3482	8.08695	8.42023	8.31855	7.87353	7.91305	8.26231	7.90332	8.13214	8.41031								viral	2	2	2	47.8	47.8	47.8	10.027	0	323.31	8220200000	64	sp|P06481|US9_HHV11	sp|P06481|US9_HHV11			Envelope protein US9	Envelope	US9
7.45268	7.18587	7.10589	7.43839	7.0239	7.54845	7.7362	7.70246	7.5249	7.18692	7.50228	7.25897	7.3088	7.59017	7.47975	7.69316								viral	7	7	7	34.2	34.2	34.2	29.79	0	121.17	18771000000	148	sp|P10218|NEC2_HHV11	sp|P10218|NEC2_HHV11			Nuclear egress protein 2 UL34	Other	UL34
6.71705	6.56058	7.08845	5.47021	6.34236	6.95417	6.68685	6.92183	6.92786	6.17716	6.40814	6.40846	6.65727	6.57455	7.1104	6.57102								viral	3	3	3	13.4	13.4	13.4	29.476	0	7.7816	3521200000	47	sp|P10208|UL24_HHV11	sp|P10208|UL24_HHV11			Protein UL24 (nuclear protein)	Other	UL24
8.1856	7.83763	8.16105	8.0114	8.03053	8.12816	8.34286	8.06892	8.13178	7.86938	8.12757	8.0798	8.11551	7.98393	8.0423	8.1763								viral	12	12	11	48	48	45.6	33.059	0	323.31	94183000000	560	sp|P10191|CEP1_HHV11	sp|P10191|CEP1_HHV11			Cytoplasmic envelopment protein 1	Other tegument	UL7
8.86538	8.74857	8.95426	8.76439	8.91769	9.04649	8.99538	9.04876	9.02502	8.91214	8.95909	8.92293	8.92467	8.91145	8.97411	9.04739								viral	15	15	15	59.5	59.5	59.5	32.47	0	323.31	550120000000	1524	sp|P06485|US02_HHV11	sp|P06485|US02_HHV11			Protein US2	Other tegument	US2
7.87014	7.29576	7.81271	7.5263	7.58993	7.87519	7.97801	7.94741	8.03266	7.76729	7.80036	7.92814	7.71716	7.80116	7.92689	7.97184								viral	7	7	7	41.9	41.9	41.9	20.492	0	266.84	26793000000	177	sp|P10239|TEG6_HHV11	sp|P10239|TEG6_HHV11			Tegument protein UL55	Other tegument	UL55
7.84013	7.59789	7.80798	7.76409	7.67984	7.88432	8.13673	7.83653	7.93901	7.64053	7.68679	7.81086	7.79531	7.7542	7.92236	7.73048								viral	10	10	10	37.2	37.2	37.2	40.972	0	323.31	43923000000	345	sp|P03176|KITH_HHV11	sp|P03176|KITH_HHV11			Thymidine kinase UL23	Tegument with enzymatic activity	TK
